# Supplementary material for: The long-distance OPT3 movement is selective between herbaceous and woody plants as shown using Malus and Arabidopsis thaliana plants
Source: Research Square preprint supplement (doi:10.21203/rs.3.rs-91864/v1), 2020-10-16
Supplement: Supplementary file 1 [file 3ac936584593343cd0c85985.xlsx]

## Sheet: Construction Primers
At5'UTR F	CGTCGACCCCGGGGGTACCGTTCCTTTTTCTTTTTCCTTTTTACC
At5'UTR R	TTCTCCGCGTCCATTTTCTTTCTTCTTCTGAAGTACCAG
Atcds F	AGAAGAAGAAAGAAAATGGACGCGGAGAAGGCTAC
Atcds R	CAATTCTGCTGAGCTTAGAAAACGGGACAGCCTTTGG
At3'UTR F	GTCCCGTTTTCTAAGCTCAGCAGAATTGATTAGATTCAA
At3'UTR R	CGCCAGGAGAGTTGTTGATTCAGAATTCGCAAAGCATCTGCAGATCAACTATAT
Md5'UTR F	CGTCGACCCCGGGGGTACCGATACTTAGTCCACTCTGAAAGAGA
Md5'UTR R	TGAAACAAAGTTGAAAGCTCTCT
Mdcds F	CGTCGACCCCGGGGGTACCGATACTTAGTCCACTCTGAAAGAGA
Mdcds R	ATGTCTTGGTGTCCACTATTTTTTGGCTATTTAAAAAACTGGACATCCTTCAAC
Md3'UTR F	ATAGCCAAAAAATAGTGGAC
Md3'UTR R	CGCCAGGAGAGTTGTTGATTCAGAATTCGAGATTAAATTGATTCTTATATAATT
MdOPT3 fragment for pTRV2 construction			ATGGCGTCCAATAACCAAAGGGACCCAGAGAAGGGGCCTAACGGCACTAA
			AGGCACTAACGGCGCCGGCGACGATTACCCACATCACGATTTTCCAGAAT
			CGGACGGTCACGAGCGATGCAAAATAGAAGAGGTGGCGCTGGTGGTGCCG
			GAGACCGACGACCCGACGTTGCCGGTGATGACATTCAGGGCGTGGTTCTT
			GGGGCTGACGTCGTGCACTCTCCTAATCTTCCTGAACACCTTCTTCAGCT
			TCCGCACTCAGCCGCTGGCAATCTCCGCCATCCTCATGCAGATTATTACG

## Sheet: qPCR Primers
MDP0000264834 F	TGAACTTTCCGATGGGCAGCGTAAT
MDP0000264834 R	TAACGGCACTAAAGGCACTAACGGC
MDP0000132036 F	CCAGAGAAGGCGCCAAAAGGCACTA
MDP0000132036 R	AGGCATCACCCCCACCGTAAGAAAT
ACTIN F（Malus domestica)	TGGCATATACTCTGGAGGCT
ACTIN R (Malus domestica)	TGGTGAGGCTCTATTCCAAC
IRT1 F (Malus domestica)	TGACAAGGGAGAAAACGGAGAC
IRT1 R (Malus domestica)	AACAACTGAATGGACAATGATACCC
FRO2 F (Malus domestica）	TCAACAACCAAAGGGCAAAAAAA
FRO2 R (Malus domestica）	AAGGCAATGAACATCACCAGGAAAG
FIT1 F (Malus domestica)	GGGAAACCATCAAGGAGGTCATA
FIT1 R (Malus domestica)	AGCCATTCATCATAAGGTCAGGA
ACTIN F（Arabidopsis)	AGCTGTTCTCTCCTTGTACGCCAGTGGTCG
ACTIN R（Arabidopsis)	GAAACATTTTCTGTGAACGATTCCTGGACC
OPT3 F (Arabidopsis)	AGCATTCAAGACATATGCGACATCGA
OPT3 R (Arabidopsis)	AGAGGGCAGTGGTCTACTTCAGT
IRT1 F (Arabidopsis)	ATGGCACTCGTGGATCTTCT
IRT1 R (Arabidopsis)	GTTAAGCCCATTTGGCGATA
FRO2 F (Arabidopsis）	AACAAACGAGAGTAAACCAATTTAATAGTAG
FRO2 R (Arabidopsis）	ATATCCAATAGATACAATAACAAAGACCGT
FIT1 F (Arabidopsis)	CACCATGGAAGGAAGAGTCAACGCTCT
FIT1 R (Arabidopsis)	AGTAAATGACTTGATGAATTCAAAACCTTGAT

## Sheet: Clone Primers
Full Length CDS F	CCAAGCAACCACCACRGACGGACACAT
Full Length CDS R	TTCCCTTCCTCCWTAACTACGACGATA
5’ RACE primer 1	GTATTTATGTCCAGTAGAAGTGAAC
5’ RACE primer 2	AGGCACCAACACCAAGTCCATT
5’ RACE primer 3	CCGTTAGTGCCTTTAGTGCCGTTAG
3’ RACE RT primer	CCAGTGAGCAGAGTGACGAGGACTCGAGCTCAAGCTTTTTTTTTTTTTTTTTT
3’ RACE primer 1	CCAGTGAGCAGAGTGACG
3’ RACE primer 2	GAGGACTCGAGCTCAAGC
Gene specific primer 1	CCTCCTATTCTTCGCCTTGC
Gene specific primer 2	ATCATTGTCCTCTGGCGACA
