# Supplementary material for: The long-distance OPT3 movement is selective between herbaceous and woody plants as shown using Malus and Arabidopsis thaliana plants
Source: Research Square preprint supplement (doi:10.21203/rs.3.rs-91864/v1), 2020-10-16
Supplement: Supplementary file 2 [file 7d02c75f07502c5c084b8036.xlsx]

## Sheet: DEGs in mobile mRNA
Table S1. Identification of total mobile mRNA DEGs in response to Fe treatment
Md/Mx root-to-leaf	Md/Mx +24 h r1	Md/Mx +24 h r2	Md/Mx +24 h r3	Md/Mx +24 h L1	Md/Mx +24 h L2	Md/Mx +24 h L3	Md/Mx -24 h r1	Md/Mx -24 h r2	Md/Mx -24 h r3	Md/Mx -24 h L1	Md/Mx -24 h L2	Md/Mx -24 h L3	COG_class	COG_class_annotation	GO_annotation	KEGG_annotation	KOG_class	KOG_class_annotation	Swissprot_annotation	eggNOG_class	eggNOG_class_annotation	nr_annotation
MD16G1160700	1576.97	1418.36	1947.22	2860.86	1171.1	2088.03	1539.03	1833.24	2101.6	925.82	1119.39	1784.99	--	--	Biological Process: defense response (GO:0006952);; Biological Process: response to biotic stimulus (GO:0009607);;	--	--	--	Major allergen Mal d 1 OS=Malus domestica OX=3750 PE=1 SV=3	S	Function unknown	major allergen Mal d 1 [Malus domestica]
MD11G1109200	502.231	807.049	1210.54	33.5355	30.9964	13.5545	651.725	1509.83	478.033	12.5925	9.20064	15.4825	--	--	Molecular Function: copper ion binding (GO:0005507);;	--	--	--	Metallothionein-like protein type 2 OS=Actinidia deliciosa OX=3627 GN=pKIWI504 PE=2 SV=1	S	Function unknown	metallothionein protein, partial [Malus domestica]
MD14G1189300	292.774	260.675	110.68	20.8888	15.7511	24.3136	402.43	311.977	477.175	26.2478	22.1878	21.6517	--	--	Molecular Function: DNA binding (GO:0003677);; Molecular Function: chromatin binding (GO:0003682);;	--	--	--	Transcription factor MYB1R1 OS=Solanum tuberosum OX=4113 PE=2 SV=1	K	Transcription	transcription factor MYB1R1-like [Malus domestica]
MD05G1106800	596.463	874.955	728.58	516.644	370.242	501.333	395.687	390.154	338.949	428.44	265.151	317.513	--	--	Biological Process: response to stress (GO:0006950);; Biological Process: response to water (GO:0009415);;	--	--	--	Dehydrin COR47 OS=Arabidopsis thaliana OX=3702 GN=COR47 PE=1 SV=2	--	--	dehydrin COR47-like [Malus domestica]
MD14G1215200	112.272	71.2773	21.4442	32.7284	11.1567	23.1417	138.236	106.243	135.086	22.8381	22.5941	34.6219	--	--	--	--	[K]	Transcription	--	S	Function unknown	PREDICTED: uncharacterized protein LOC103400734 [Malus domestica]
MD15G1199200	59.3218	48.2712	16.7858	48.6098	35.3797	43.9965	64.777	87.1176	63.1392	14.3431	15.5658	9.60232	--	--	Cellular Component: nucleus (GO:0005634);; Biological Process: regulation of transcription, DNA-templated (GO:0006355);; Biological Process: regulation of translation (GO:0006417);; Biological Process: response to light stimulus (GO:0009416);; Cellular Component: plastid (GO:0009536);; Biological Process: auxin-activated signaling pathway (GO:0009734);; Molecular Function: protein dimerization ac…	K14484|0|mdm:103434164|K14484 auxin-responsive protein IAA | (RefSeq) auxin-responsive protein IAA16	--	--	Auxin-responsive protein IAA16 OS=Arabidopsis thaliana OX=3702 GN=IAA16 PE=1 SV=1	K	Transcription	auxin-responsive protein IAA16 [Malus domestica]
MD17G1110500	56.4418	51.9474	38.5124	22.3778	12.6178	19.7529	60.6459	66.9563	66.6886	29.5245	30.4127	34.7709	--	--	--	--	--	--	--	S	Function unknown	PREDICTED: uncharacterized protein LOC103429653 isoform X2 [Malus domestica]
MD06G1055800	77.3446	54.2599	19.2572	28.2207	11.5947	15.5109	58.0483	85.3068	59.6917	10.5033	11.7485	13.9207	--	--	--	--	--	--	UV-B-induced protein At3g17800, chloroplastic OS=Arabidopsis thaliana OX=3702 GN=At3g17800 PE=2 SV=1	S	Function unknown	PREDICTED: UV-B-induced protein At3g17800, chloroplastic-like [Malus domestica]
MD15G1151500	20.6866	57.0085	14.1188	20.0454	7.72497	17.7949	44.0952	88.4589	23.2631	12.6796	9.78966	9.37468	[L]	Replication, recombination and repair	--	--	--	--	Jacalin-related lectin 19 OS=Arabidopsis thaliana OX=3702 GN=JAL19 PE=2 SV=1	S	Function unknown	PREDICTED: jacalin-related lectin 19-like [Malus domestica]
MD01G1134700	22.7379	18.8996	5.97386	9.4182	10.4546	8.85941	39.605	33.1701	37.3817	15.9646	14.5978	14.6543	--	--	--	--	--	--	F-box protein At2g16365 OS=Arabidopsis thaliana OX=3702 GN=At2g16365 PE=2 SV=2	S	Function unknown	PREDICTED: uncharacterized protein LOC103440385 [Malus domestica]
MD10G1266800	31.8953	37.9199	28.0717	25.6617	19.5979	23.639	30.5415	38.8297	23.7718	15.1219	17.0198	10.6187	[V]	Defense mechanisms	Molecular Function: carboxylic ester hydrolase activity (GO:0004091);; Cellular Component: cytoplasmic vesicle (GO:0016023);; Molecular Function: S-formylglutathione hydrolase activity (GO:0018738);; Biological Process: formaldehyde catabolic process (GO:0046294);; Cellular Component: apoplast (GO:0048046);;	K01070|0|mdm:103454483|K01070 S-formylglutathione hydrolase [EC:3.1.2.12] | (RefSeq) S-formylglutathione hydrolase	[R]	General function prediction only	S-formylglutathione hydrolase OS=Arabidopsis thaliana OX=3702 GN=SFGH PE=1 SV=2	S	Function unknown	PREDICTED: S-formylglutathione hydrolase isoform X1 [Malus domestica]
MD02G1069600	31.9383	30.3573	16.3697	11.2042	8.96136	13.7657	29.1267	25.2424	24.9037	14.0442	13.0987	10.273	--	--	--	--	--	--	Tobamovirus multiplication protein 1 OS=Nicotiana tabacum OX=4097 GN=TOM1 PE=1 SV=1	S	Function unknown	PREDICTED: tobamovirus multiplication protein 1 [Malus domestica]
MD10G1072800	33.0551	42.2651	32.8783	0.759771	1.36909	0.338139	25.8023	52.6989	19.2438	0.394815	0.07306	0	--	--	--	--	--	--	--	S	Function unknown	PREDICTED: uncharacterized protein LOC103955039 [Pyrus x bretschneideri]
MD06G1238300	19.1998	14.4579	11.8398	10.0926	6.3199	9.98653	23.7919	16.822	16.4677	15.0429	11.251	10.6732	--	--	--	K14972|0|mdm:103429764|K14972 PAX-interacting protein 1 | (RefSeq) mediator of RNA polymerase II transcription subunit 15a-like	--	--	Mediator of RNA polymerase II transcription subunit 15a OS=Arabidopsis thaliana OX=3702 GN=MED15A PE=1 SV=1	--	--	PREDICTED: mediator of RNA polymerase II transcription subunit 15a-like isoform X1 [Pyrus x bretschneideri]
MD10G1156700	17.8787	34.098	58.1057	33.3543	25.9112	34.059	22.1079	35.5683	23.7952	30.1459	31.2133	27.1316	[M]	Cell wall/membrane/envelope biogenesis	Molecular Function: glycogenin glucosyltransferase activity (GO:0008466);; Molecular Function: intramolecular transferase activity (GO:0016866);; Biological Process: cellulose biosynthetic process (GO:0030244);;	K13379|0|mdm:103424567|K13379 reversibly glycosylated polypeptide / UDP-arabinopyranose mutase [EC:2.4.1.- 5.4.99.30] | (RefSeq) alpha-1,4-glucan-protein synthase [UDP-forming]	--	--	Probable UDP-arabinopyranose mutase 1 OS=Pisum sativum OX=3888 GN=UPTG PE=1 SV=1	O	Posttranslational modification, protein turnover, chaperones	PREDICTED: alpha-1,4-glucan-protein synthase [UDP-forming] [Malus domestica]
MD01G1173400	24.2824	23.505	39.6815	30.8436	13.299	23.0841	18.9381	30.3311	18.1292	24.9905	34.0414	37.5588	[J]	Translation, ribosomal structure and biogenesis	--	K02998|0|mdm:103412154|K02998 small subunit ribosomal protein SAe | (RefSeq) 40S ribosomal protein SA-like	[J]	Translation, ribosomal structure and biogenesis	40S ribosomal protein SA OS=Cicer arietinum OX=3827 GN=RAP40 PE=2 SV=1	J	Translation, ribosomal structure and biogenesis	PREDICTED: 40S ribosomal protein SA-like [Malus domestica]
MD03G1032700	11.3006	15.0933	14.0156	18.9623	9.70878	14.2169	18.7001	16.4257	24.0625	12.5296	19.5609	14.2818	--	--	Molecular Function: DNA binding (GO:0003677);; Molecular Function: chromatin binding (GO:0003682);; Molecular Function: zinc ion binding (GO:0008270);;	--	--	--	Transcription factor MYBS3 OS=Oryza sativa subsp. japonica OX=39947 GN=MYBS3 PE=2 SV=1	K	Transcription	uncharacterized protein LOC103443746 [Malus domestica]
MD03G1271600	10.9424	9.7782	17.7272	0.377489	0.548222	0.174869	17.033	14.0788	13.2378	0.634282	0.592875	0.350088	[R]	General function prediction only	--	--	[C]	Energy production and conversion	Perakine reductase OS=Rauvolfia serpentina OX=4060 GN=PR PE=1 SV=1	C	Energy production and conversion	PREDICTED: perakine reductase-like [Pyrus x bretschneideri]
MD07G1294000	15.9095	13.759	22.8716	9.04449	4.43872	8.95488	16.8944	17.8706	19.6609	15.0527	13.0198	15.7447	[E]	Amino acid transport and metabolism	Molecular Function: obsolete gamma-glutamyltransferase activity (GO:0003840);; Cellular Component: vacuole (GO:0005773);; Biological Process: glutathione catabolic process (GO:0006751);; Molecular Function: glutathione gamma-glutamylcysteinyltransferase activity (GO:0016756);;	K18592|0|mdm:103449889|K18592 gamma-glutamyltranspeptidase / glutathione hydrolase / leukotriene-C4 hydrolase [EC:2.3.2.2 3.4.19.13 3.4.19.14] | (RefSeq) gamma-glutamyltranspeptidase 3	[E]	Amino acid transport and metabolism	Glutathione hydrolase 3 OS=Arabidopsis thaliana OX=3702 GN=GGT3 PE=2 SV=1	E	Amino acid transport and metabolism	PREDICTED: gamma-glutamyltranspeptidase 3 [Malus domestica]
MD17G1156300	11.8178	11.3824	11.0942	25.3501	17.4553	29.8684	16.7995	22.4585	15.7417	22.6979	23.2489	16.3893	--	--	--	--	--	--	--	S	Function unknown	PREDICTED: uncharacterized protein LOC103436318 [Malus domestica]
MD04G1225100	21.8825	77.1851	139.594	3.07672	10.9182	6.87903	15.8051	27.5634	19.2496	1.28301	2.08424	1.41486	--	--	Molecular Function: GTPase activity (GO:0003924);; Molecular Function: structural constituent of cytoskeleton (GO:0005200);; Molecular Function: GTP binding (GO:0005525);; Cellular Component: cytoplasm (GO:0005737);; Cellular Component: microtubule (GO:0005874);; Biological Process: obsolete GTP catabolic process (GO:0006184);; Biological Process: microtubule-based process (GO:0007017);; Biologic…	K07374|0|mdm:103436316|K07374 tubulin alpha | (RefSeq) tubulin alpha chain	[Z]	Cytoskeleton	Tubulin alpha chain OS=Prunus dulcis OX=3755 GN=TUBA PE=2 SV=1	Z	Cytoskeleton	PREDICTED: tubulin alpha chain [Elaeis guineensis]
MD07G1051300	14.4896	15.5862	20.803	7.75531	5.40814	7.84461	15.4381	13.8023	15.5104	11.2425	8.84964	9.90046	--	--	Molecular Function: thiol oxidase activity (GO:0016972);; Biological Process: cell redox homeostasis (GO:0045454);; Biological Process: oxidation-reduction process (GO:0055114);;	K10758|0|mdm:103423735|K10758 thiol oxidase [EC:1.8.3.2] | (RefSeq) sulfhydryl oxidase 2-like	[D]	Cell cycle control, cell division, chromosome partitioning	Sulfhydryl oxidase 2 OS=Arabidopsis thaliana OX=3702 GN=QSOX2 PE=2 SV=2	O	Posttranslational modification, protein turnover, chaperones	PREDICTED: sulfhydryl oxidase 2-like isoform X2 [Malus domestica]
MD01G1213900	17.7794	19.5058	22.5317	21.1008	12.6866	14.1256	14.2654	14.9948	13.0409	12.2192	11.9732	10.0888	--	--	Molecular Function: structural constituent of ribosome (GO:0003735);; Cellular Component: ribosome (GO:0005840);; Biological Process: translational elongation (GO:0006414);;	K02943|6.37591e-36|mdm:103405686|K02943 large subunit ribosomal protein LP2 | (RefSeq) 60S acidic ribosomal protein P2B-like	[J]	Translation, ribosomal structure and biogenesis	60S acidic ribosomal protein P2 OS=Parthenium argentatum OX=35935 PE=3 SV=1	J	Translation, ribosomal structure and biogenesis	PREDICTED: 60S acidic ribosomal protein P2B-like [Malus domestica]
MD05G1335600	8.51353	6.53934	9.93613	2.66653	2.59511	2.22476	13.7826	11.331	10.8918	2.03262	2.09949	1.69509	--	--	Molecular Function: structural constituent of ribosome (GO:0003735);; Cellular Component: ribosome (GO:0005840);; Biological Process: translation (GO:0006412);;	K02934|2.91995e-139|mdm:103442228|K02934 large subunit ribosomal protein L6e | (RefSeq) 60S ribosomal protein L6-3-like	[J]	Translation, ribosomal structure and biogenesis	60S ribosomal protein L6-3 OS=Arabidopsis thaliana OX=3702 GN=RPL6C PE=2 SV=1	J	Translation, ribosomal structure and biogenesis	PREDICTED: 60S ribosomal protein L6-3-like [Malus domestica]
MD07G1249700	13.3862	5.26757	7.75069	16.3616	11.2794	15.651	13.3484	7.93049	14.7002	18.3035	20.5439	11.0989	[L]	Replication, recombination and repair	Cellular Component: ubiquitin ligase complex (GO:0000151);; Molecular Function: ubiquitin-protein transferase activity (GO:0004842);; Biological Process: protein ubiquitination (GO:0016567);;	--	[S]	Function unknown	U-box domain-containing protein 14 OS=Arabidopsis thaliana OX=3702 GN=PUB14 PE=1 SV=1	S	Function unknown	PREDICTED: U-box domain-containing protein 14 [Malus domestica]
MD05G1248300	12.9784	7.04233	6.36792	32.1897	13.1535	30.603	13.1154	8.02669	13.0673	34.7812	42.272	41.1586	--	--	Cellular Component: integral component of membrane (GO:0016021);;	--	[E]	Amino acid transport and metabolism	GABA transporter 1 OS=Arabidopsis thaliana OX=3702 GN=GAT1 PE=1 SV=1	E	Amino acid transport and metabolism	PREDICTED: GABA transporter 1-like [Pyrus x bretschneideri]
MD11G1196300	10.2888	14.5395	18.726	11.5914	7.25507	11.0706	13.0021	12.4502	12.843	18.7391	12.7934	14.576	--	--	--	--	--	--	--	S	Function unknown	PREDICTED: uncharacterized protein LOC103964371 isoform X1 [Pyrus x bretschneideri]
MD11G1269500	12.8429	11.1671	9.43918	8.04791	7.57027	9.92617	11.9839	10.2452	15.56	20.1842	14.3932	15.7734	--	--	--	--	[O]	Posttranslational modification, protein turnover, chaperones	E3 ubiquitin-protein ligase At4g11680 OS=Arabidopsis thaliana OX=3702 GN=At4g11680 PE=2 SV=1	O	Posttranslational modification, protein turnover, chaperones	PREDICTED: E3 ubiquitin-protein ligase At1g63170-like [Malus domestica]
MD02G1143900	12.0742	18.8468	15.3687	67.0453	28.6294	58.6567	11.9109	21.2475	13.2357	54.2296	68.9748	66.3782	--	--	--	K19042|0|mdm:103435422|K19042 E3 ubiquitin-protein ligase BOI and related proteins [EC:2.3.2.27] | (RefSeq) probable BOI-related E3 ubiquitin-protein ligase 3	[O]	Posttranslational modification, protein turnover, chaperones	Probable BOI-related E3 ubiquitin-protein ligase 3 OS=Arabidopsis thaliana OX=3702 GN=BRG3 PE=1 SV=1	S	Function unknown	PREDICTED: probable BOI-related E3 ubiquitin-protein ligase 3 [Malus domestica]
MD10G1124200	6.7554	2.38665	2.22519	6.87577	3.75165	3.27177	11.8411	10.6504	10.3776	10.0408	7.25353	6.70484	--	--	--	--	[K]	Transcription	GATA transcription factor 1 OS=Arabidopsis thaliana OX=3702 GN=GATA1 PE=2 SV=2	K	Transcription	PREDICTED: GATA transcription factor 1-like [Malus domestica]
MD01G1113800	9.95363	11.4236	7.25239	5.0307	9.39197	5.37203	11.5419	13.1507	4.99076	5.89296	8.68521	5.90927	--	--	Molecular Function: zinc ion binding (GO:0008270);;	--	--	--	--	S	Function unknown	PREDICTED: uncharacterized protein LOC103420049 isoform X1 [Malus domestica]
MD16G1101100	9.67339	10.6981	6.52124	11.96	8.68028	7.88737	11.1819	8.30649	11.2227	9.04564	6.1671	12.8677	--	--	--	--	--	--	Polyadenylate-binding protein-interacting protein 5 OS=Arabidopsis thaliana OX=3702 GN=CID5 PE=2 SV=1	S	Function unknown	PREDICTED: polyadenylate-binding protein-interacting protein 6-like [Malus domestica]
MD00G1060400	14.8943	13.1901	10.4497	3.61572	2.42356	4.50775	10.233	7.51126	14.9547	2.46068	2.99443	2.31386	--	--	Cellular Component: mitochondrial inner membrane (GO:0005743);; Biological Process: glycolytic process (GO:0006096);; Biological Process: protein targeting to vacuole (GO:0006623);; Biological Process: mitochondrial pyruvate transport (GO:0006850);; Biological Process: aerobic respiration (GO:0009060);; Biological Process: response to cadmium ion (GO:0046686);;	--	[S]	Function unknown	Mitochondrial pyruvate carrier 4 OS=Arabidopsis thaliana OX=3702 GN=MPC4 PE=3 SV=1	S	Function unknown	PREDICTED: mitochondrial pyruvate carrier 4-like [Malus domestica]
MD17G1110200	9.71451	9.37218	7.51698	11.945	9.01855	12.7665	10.2324	11.2522	9.18333	8.38486	9.13979	7.13701	[M]	Cell wall/membrane/envelope biogenesis	Cellular Component: cytoplasm (GO:0005737);; Molecular Function: 3-deoxy-manno-octulosonate cytidylyltransferase activity (GO:0008690);; Biological Process: lipopolysaccharide biosynthetic process (GO:0009103);;	K00979|0|mdm:103413289|K00979 3-deoxy-manno-octulosonate cytidylyltransferase (CMP-KDO synthetase) [EC:2.7.7.38] | (RefSeq) 3-deoxy-manno-octulosonate cytidylyltransferase, mitochondrial	--	--	3-deoxy-manno-octulosonate cytidylyltransferase, mitochondrial OS=Arabidopsis thaliana OX=3702 GN=KDSB PE=1 SV=1	M	Cell wall/membrane/envelope biogenesis	PREDICTED: 3-deoxy-manno-octulosonate cytidylyltransferase, mitochondrial-like [Malus domestica]
MD15G1080800	8.97801	14.8843	14.6083	7.87753	5.09016	11.0002	9.75681	10.2091	10.9408	10.4655	11.1013	15.7067	[L]	Replication, recombination and repair	--	K10706|0|mdm:103439081|K10706 senataxin [EC:3.6.4.-] | (RefSeq) uncharacterized LOC103439081	[A]	RNA processing and modification	Probable helicase MAGATAMA 3 OS=Arabidopsis thaliana OX=3702 GN=MAA3 PE=2 SV=1	L	Replication, recombination and repair	PREDICTED: uncharacterized protein LOC103439081 [Malus domestica]
MD13G1195400	6.86393	10.5449	5.00364	5.14749	4.8069	4.43209	9.7445	8.95886	13.1858	9.3427	6.73022	7.05105	--	--	--	--	--	--	--	S	Function unknown	PREDICTED: uncharacterized protein LOC103456377 [Malus domestica]
MD17G1210700	7.5022	2.95241	3.1565	10.7642	3.87252	9.53737	9.20378	5.14378	15.1408	25.0467	14.7722	21.1539	--	--	--	--	--	--	Scarecrow-like protein 3 OS=Arabidopsis thaliana OX=3702 GN=SCL3 PE=1 SV=1	K	Transcription	PREDICTED: scarecrow-like protein 3 [Malus domestica]
MD10G1091000	8.88223	8.96696	12.0782	8.46691	4.08066	9.28812	9.18895	8.55533	9.37618	14.3685	13.2276	14.4513	--	--	Molecular Function: metal ion binding (GO:0046872);;	K14816|6.04952e-173|mdm:103441346|K14816 pre-60S factor REI1 | (RefSeq) cytoplasmic 60S subunit biogenesis factor REI1 homolog 1-like	[R]	General function prediction only	Cytoplasmic 60S subunit biogenesis factor REI1 homolog 2 OS=Arabidopsis thaliana OX=3702 GN=REIL2 PE=1 SV=1	S	Function unknown	PREDICTED: cytoplasmic 60S subunit biogenesis factor REI1 homolog 1-like [Pyrus x bretschneideri]
MD16G1234900	6.16234	2.27396	6.1001	26.7508	19.3512	27.9141	8.44086	7.03544	8.31786	32.0471	43.8131	38.3887	--	--	--	--	--	--	U-box domain-containing protein 35 OS=Arabidopsis thaliana OX=3702 GN=PUB35 PE=2 SV=2	T	Signal transduction mechanisms	PREDICTED: U-box domain-containing protein 35 isoform X1 [Malus domestica]
MD00G1201800	5.9518	1.48236	2.72422	3.7375	2.02269	2.33511	7.90787	7.54727	10.4662	4.16184	4.24467	5.8034	[G]	Carbohydrate transport and metabolism	Biological Process: carbohydrate transport (GO:0008643);; Molecular Function: symporter activity (GO:0015293);; Cellular Component: integral component of membrane (GO:0016021);; Molecular Function: substrate-specific transmembrane transporter activity (GO:0022891);; Molecular Function: 2-alkenal reductase [NAD(P)] activity (GO:0032440);; Biological Process: transmembrane transport (GO:0055085);; …	--	[R]	General function prediction only	Hexose carrier protein HEX6 OS=Ricinus communis OX=3988 GN=HEX6 PE=2 SV=1	G	Carbohydrate transport and metabolism	PREDICTED: hexose carrier protein HEX6-like [Pyrus x bretschneideri]
MD06G1228500	8.70805	7.31218	6.16534	33.4001	15.9195	22.7487	7.8977	10.8114	7.27336	31.4737	31.7013	32.985	[E]	Amino acid transport and metabolism	Molecular Function: 3-isopropylmalate dehydratase activity (GO:0003861);; Biological Process: leucine biosynthetic process (GO:0009098);; Cellular Component: 3-isopropylmalate dehydratase complex (GO:0009316);;	K01704|1.54812e-132|mdm:103437102|K01704 3-isopropylmalate/(R)-2-methylmalate dehydratase small subunit [EC:4.2.1.33 4.2.1.35] | (RefSeq) 3-isopropylmalate dehydratase small subunit 3-like	[E]	Amino acid transport and metabolism	3-isopropylmalate dehydratase small subunit 3 OS=Arabidopsis thaliana OX=3702 GN=At2g43090 PE=1 SV=1	E	Amino acid transport and metabolism	PREDICTED: 3-isopropylmalate dehydratase small subunit 3-like [Malus domestica]
MD16G1175900	7.52428	9.0457	10.4526	4.34744	2.84659	3.84911	7.80044	8.73601	8.42989	8.97328	8.77326	7.91113	--	--	--	--	--	--	--	S	Function unknown	PREDICTED: uncharacterized protein LOC103401295 [Malus domestica]
MD11G1244700	6.788	5.95896	6.51236	13.8121	12.4227	11.2859	7.68727	6.05169	7.41499	7.01629	9.16176	4.39175	[K]	Transcription	--	K19613|1.57978e-164|mdm:103400759|K19613 leucine-rich repeat protein SHOC2 | (RefSeq) putative disease resistance protein RGA3	--	--	Putative disease resistance protein RGA4 OS=Solanum bulbocastanum OX=147425 GN=RGA4 PE=2 SV=1	S	Function unknown	PREDICTED: putative disease resistance protein RGA3 [Malus domestica]
MD15G1115700	8.64089	3.5385	6.54438	5.69228	3.03505	6.59293	7.59241	7.7126	8.01017	12.3637	10.377	10.814	[T]	Signal transduction mechanisms	Molecular Function: protein serine/threonine kinase activity (GO:0004674);; Molecular Function: ATP binding (GO:0005524);; Biological Process: protein phosphorylation (GO:0006468);;	K04733|8.06139e-142|mdm:103406369|K04733 interleukin-1 receptor-associated kinase 4 [EC:2.7.11.1] | (RefSeq) protein kinase APK1A, chloroplastic-like	[T]	Signal transduction mechanisms	Receptor-like cytoplasmic kinase 176 OS=Oryza sativa subsp. japonica OX=39947 GN=RLCK176 PE=1 SV=1	T	Signal transduction mechanisms	PREDICTED: protein kinase APK1A, chloroplastic-like [Malus domestica]
MD02G1317900	8.77279	10.122	24.5127	23.3625	48.7103	38.4367	7.50972	8.90908	4.93873	30.6907	33.4042	14.9438	[M]	Cell wall/membrane/envelope biogenesis	Molecular Function: nucleotide binding (GO:0000166);; Biological Process: negative regulation of flavonoid biosynthetic process (GO:0009964);; Molecular Function: anthocyanidin reductase activity (GO:0033729);; Biological Process: cellular metabolic process (GO:0044237);; Molecular Function: coenzyme binding (GO:0050662);; Biological Process: oxidation-reduction process (GO:0055114);;	K08695|0|mdm:103434638|K08695 anthocyanidin reductase [EC:1.3.1.77] | (RefSeq) ANR2a, ANR2b; anthocyanidin reductase	[V]	Defense mechanisms	Anthocyanidin reductase ((2S)-flavan-3-ol-forming) OS=Vitis vinifera OX=29760 GN=ANR PE=3 SV=1	M	Cell wall/membrane/envelope biogenesis	anthocyanidin reductase [Malus domestica]
MD13G1170000	5.58885	5.48528	7.86616	5.7896	3.77421	8.00952	6.86006	6.55988	7.53269	6.88068	7.01657	7.6007	--	--	Molecular Function: zinc ion binding (GO:0008270);;	K19042|0|mdm:103455959|K19042 E3 ubiquitin-protein ligase BOI and related proteins [EC:2.3.2.27] | (RefSeq) probable BOI-related E3 ubiquitin-protein ligase 2	[O]	Posttranslational modification, protein turnover, chaperones	BOI-related E3 ubiquitin-protein ligase 1 OS=Arabidopsis thaliana OX=3702 GN=BRG1 PE=1 SV=1	S	Function unknown	PREDICTED: probable BOI-related E3 ubiquitin-protein ligase 2 [Malus domestica]
MD11G1185700	6.78753	7.26216	2.31586	5.52879	2.65345	4.39962	6.76867	3.33394	4.20951	4.7328	4.20764	4.29415	--	--	--	K05302|0|mdm:103431763|K05302 N-lysine methyltransferase SETD6 [EC:2.1.1.-] | (RefSeq) N-lysine methyltransferase setd6-like	[R]	General function prediction only	--	S	Function unknown	PREDICTED: N-lysine methyltransferase setd6-like [Malus domestica]
MD07G1308400	8.18979	9.5425	6.83554	8.36672	5.3865	10.3724	6.70172	7.31991	8.33563	18.3086	11.3413	12.9165	[R]	General function prediction only	--	K00737|0|mdm:103403060|K00737 beta-1,4-mannosyl-glycoprotein beta-1,4-N-acetylglucosaminyltransferase [EC:2.4.1.144] | (RefSeq) uncharacterized LOC103403060	--	--	--	S	Function unknown	PREDICTED: uncharacterized protein LOC103403060 [Malus domestica]
MD05G1106900	8.25865	9.52067	8.25752	1.51544	1.33605	0.719219	6.6889	8.03327	5.71911	0.381843	0.742752	0.363774	--	--	--	--	--	--	DUF724 domain-containing protein 3 OS=Arabidopsis thaliana OX=3702 GN=DUF3 PE=1 SV=1	S	Function unknown	PREDICTED: uncharacterized protein LOC103952782 isoform X2 [Pyrus x bretschneideri]
MD14G1235300	4.17862	5.41191	5.90052	6.81588	6.99746	6.08128	6.45857	11.3217	5.32393	4.2225	4.33813	3.0541	--	--	Biological Process: iron ion transport (GO:0006826);; Cellular Component: chloroplast envelope (GO:0009941);; Cellular Component: integral component of membrane (GO:0016021);;	K15111|0|mdm:103402170|K15111 solute carrier family 25 (mitochondrial S-adenosylmethionine transporter), member 26 | (RefSeq) protein MITOFERRINLIKE 1, chloroplastic-like	[C]	Energy production and conversion	Protein MITOFERRINLIKE 1, chloroplastic OS=Arabidopsis thaliana OX=3702 GN=MFL1 PE=2 SV=1	S	Function unknown	PREDICTED: protein MITOFERRINLIKE 1, chloroplastic-like [Malus domestica]
MD00G1030500	8.60194	21.9516	11.9653	3.17375	4.99762	5.64221	5.6802	7.32425	4.45155	6.65472	4.6792	5.03215	--	--	--	--	[O]	Posttranslational modification, protein turnover, chaperones	Ubiquitin carboxyl-terminal hydrolase 12 OS=Arabidopsis thaliana OX=3702 GN=UBP12 PE=1 SV=2	O	Posttranslational modification, protein turnover, chaperones	PREDICTED: MATH domain and coiled-coil domain-containing protein At3g58270-like [Malus domestica]
MD05G1220500	3.4035	13.1454	13.9539	0.138994	0.400585	0.190718	5.65403	13.4412	1.70557	0.055879	0.077857	0	--	--	Molecular Function: aspartic-type endopeptidase activity (GO:0004190);; Biological Process: proteolysis (GO:0006508);;	--	[O]	Posttranslational modification, protein turnover, chaperones	Aspartyl protease AED3 OS=Arabidopsis thaliana OX=3702 GN=AED3 PE=1 SV=1	O	Posttranslational modification, protein turnover, chaperones	PREDICTED: aspartyl protease AED3-like [Malus domestica]
MD05G1280300	4.03379	4.98561	4.34379	15.0669	14.8618	21.2731	5.32826	8.60179	7.74409	7.4619	9.4661	5.72173	[J]	Translation, ribosomal structure and biogenesis	Molecular Function: structural constituent of ribosome (GO:0003735);; Cellular Component: ribosome (GO:0005840);; Biological Process: translation (GO:0006412);; Cellular Component: chloroplast stroma (GO:0009570);; Cellular Component: thylakoid (GO:0009579);; Biological Process: embryo development ending in seed dormancy (GO:0009793);; Cellular Component: chloroplast envelope (GO:0009941);; Biolo…	K02871|7.61731e-62|pxb:103965399|K02871 large subunit ribosomal protein L13 | (RefSeq) 50S ribosomal protein L13, chloroplastic	[J]	Translation, ribosomal structure and biogenesis	50S ribosomal protein L13, chloroplastic OS=Arabidopsis thaliana OX=3702 GN=RPL13 PE=2 SV=1	J	Translation, ribosomal structure and biogenesis	PREDICTED: 50S ribosomal protein L13, chloroplastic [Pyrus x bretschneideri]
Apple_newGene_104807	9.55336	5.51369	3.15469	5.30286	2.1108	3.63601	5.17676	6.01164	3.75184	16.0546	13.4415	15.8432	--	--	--	--	--	--	Methyl-CpG-binding domain-containing protein 10 OS=Arabidopsis thaliana OX=3702 GN=MBD10 PE=1 SV=1	S	Function unknown	PREDICTED: methyl-CpG-binding domain-containing protein 11 [Malus domestica]
MD09G1096900	2.73216	3.14776	2.8358	1.14772	1.8071	1.35684	4.68774	2.90688	2.49118	1.93476	1.5767	1.53128	--	--	--	--	--	--	--	S	Function unknown	PREDICTED: uncharacterized protein LOC103432698 isoform X1 [Malus domestica]
MD12G1165800	3.0982	3.05641	0.154494	3.81098	4.36308	3.61753	5.57043	5.14542	6.7701	0.312773	0.584196	0.020708	[P]	Inorganic ion transport and metabolism	Biological Process: calcium ion transport (GO:0006816);; Molecular Function: calcium:proton antiporter activity (GO:0015369);; Cellular Component: integral component of membrane (GO:0016021);; Biological Process: transmembrane transport (GO:0055085);;	K07300|0|mdm:103450620|K07300 Ca2+:H+ antiporter | (RefSeq) vacuolar cation/proton exchanger 3-like	[P]	Inorganic ion transport and metabolism	Vacuolar cation/proton exchanger 3 OS=Arabidopsis thaliana OX=3702 GN=CAX3 PE=1 SV=1	P	Inorganic ion transport and metabolism	PREDICTED: vacuolar cation/proton exchanger 3-like [Malus domestica]
MD11G1161900	2.2503	4.18255	1.65233	32.4516	20.7562	39.1699	4.64274	10.4089	9.16676	47.6777	34.9418	37.036	[R]	General function prediction only	--	--	[R]	General function prediction only	--	S	Function unknown	PREDICTED: uncharacterized protein LOC103455619 isoform X1 [Malus domestica]
MD09G1203200	6.09778	20.9339	13.1869	5.82694	4.9616	5.2668	4.40292	15.2962	3.88096	2.17139	3.25913	1.65004	--	--	--	--	--	--	O-fucosyltransferase 39 OS=Arabidopsis thaliana OX=3702 GN=OFUT39 PE=2 SV=1	S	Function unknown	PREDICTED: uncharacterized protein At1g04910-like isoform X1 [Malus domestica]
MD02G1023800	4.87256	3.66164	1.70633	0.266912	0.165316	0	4.06119	2.89492	0.619684	0	0	0	[H]	Coenzyme transport and metabolism	Molecular Function: methionine adenosyltransferase activity (GO:0004478);; Molecular Function: ATP binding (GO:0005524);; Cellular Component: cytoplasm (GO:0005737);; Biological Process: S-adenosylmethionine biosynthetic process (GO:0006556);; Biological Process: one-carbon metabolic process (GO:0006730);; Molecular Function: metal ion binding (GO:0046872);;	K00789|2.63102e-69|mdm:103436288|K00789 S-adenosylmethionine synthetase [EC:2.5.1.6] | (RefSeq) S-adenosylmethionine synthase 4-like	[H]	Coenzyme transport and metabolism	S-adenosylmethionine synthase 2 OS=Catharanthus roseus OX=4058 GN=SAMS2 PE=1 SV=1	H	Coenzyme transport and metabolism	PREDICTED: S-adenosylmethionine synthase 4-like [Malus domestica]
MD04G1100400	3.52344	3.31703	1.55711	4.69084	3.46796	5.38561	3.95994	4.59721	4.72577	3.05559	3.99403	3.80357	--	--	--	K15032|0|mdm:103432464|K15032 mTERF domain-containing protein, mitochondrial | (RefSeq) transcription termination factor MTERF4, chloroplastic	[KR]	--	Transcription termination factor MTERF4, chloroplastic OS=Arabidopsis thaliana OX=3702 GN=MTERF4 PE=1 SV=1	S	Function unknown	PREDICTED: transcription termination factor MTERF4, chloroplastic [Malus domestica]
MD05G1019200	5.50555	7.23819	2.77426	34.1296	16.1545	25.7535	3.9009	5.2512	2.97081	15.397	14.3879	13.9665	[T]	Signal transduction mechanisms	--	K00898|1.61615e-120|pxb:103950319|K00898 pyruvate dehydrogenase kinase 2/3/4 [EC:2.7.11.2] | (RefSeq) pyruvate dehydrogenase (acetyl-transferring) kinase, mitochondrial-like	[T]	Signal transduction mechanisms	[Pyruvate dehydrogenase (acetyl-transferring)] kinase, mitochondrial OS=Arabidopsis thaliana OX=3702 GN=PDK PE=1 SV=1	T	Signal transduction mechanisms	PREDICTED: pyruvate dehydrogenase (acetyl-transferring) kinase, mitochondrial-like isoform X2 [Malus domestica]
MD08G1099300	4.2342	5.97324	12.5345	4.95603	2.65865	5.07074	3.53671	5.96242	5.51048	18.7501	18.4662	16.6036	[O]	Posttranslational modification, protein turnover, chaperones	--	--	[O]	Posttranslational modification, protein turnover, chaperones	DnaJ protein P58IPK homolog A OS=Oryza sativa subsp. japonica OX=39947 GN=P58A PE=1 SV=1	O	Posttranslational modification, protein turnover, chaperones	PREDICTED: dnaJ homolog subfamily B member 7-like isoform X1 [Malus domestica]
MD10G1198000	4.55258	4.15398	1.95473	4.23173	2.54053	2.92671	3.15679	4.28625	3.63407	3.36037	1.92876	2.06818	--	--	--	--	[S]	Function unknown	--	S	Function unknown	PREDICTED: uncharacterized protein LOC103419769 [Malus domestica]
MD08G1131000	3.5583	4.98792	5.94453	2.56164	1.51591	1.82091	3.12263	6.83686	3.91858	3.93061	3.11401	2.92705	--	--	--	--	--	--	O-fucosyltransferase 20 OS=Arabidopsis thaliana OX=3702 GN=OFUT20 PE=1 SV=1	S	Function unknown	PREDICTED: uncharacterized protein At1g04910-like [Malus domestica]
MD12G1097800	4.5628	3.32944	1.33781	1.46033	1.43677	2.20194	3.10976	2.18964	5.69264	2.43984	1.49343	1.69443	--	--	--	K03671|1.23941e-17|pxb:103932424|K03671 thioredoxin 1 | (RefSeq) thioredoxin O2, mitochondrial-like	--	--	--	--	--	PREDICTED: uncharacterized protein LOC103411662 [Malus domestica]
MD15G1364900	1.38652	15.2451	3.39111	4.796	4.81064	3.39454	2.93674	6.36472	0.244654	0.87723	2.53705	0.97552	--	--	--	--	--	--	--	--	--	PREDICTED: uncharacterized protein LOC103439886 [Malus domestica]
MD11G1081900	3.25266	2.78202	1.65631	2.72038	3.04125	3.85502	2.79563	6.8146	2.03719	1.46297	2.32896	1.1091	[C]	Energy production and conversion	--	--	--	--	Hsp70-Hsp90 organizing protein 2 OS=Arabidopsis thaliana OX=3702 GN=HOP2 PE=1 SV=1	S	Function unknown	PREDICTED: sperm-associated antigen 1-like [Pyrus x bretschneideri]
MD16G1179500	2.48346	2.58044	2.53389	0.801033	0.708292	0.843653	2.70835	3.68301	2.5906	0.680737	1.14107	1.23915	--	--	--	K17362|1.21912e-117|mdm:103436662|K17362 acyl-coenzyme A thioesterase 13 [EC:3.1.2.-] | (RefSeq) acyl-coenzyme A thioesterase 13-like	[R]	General function prediction only	--	Q	Secondary metabolites biosynthesis, transport and catabolism	PREDICTED: acyl-coenzyme A thioesterase 13-like [Malus domestica]
MD15G1374000	3.73273	12.6977	5.36524	1.78724	1.81147	0.12512	2.6591	1.40993	1.0336	0.202152	0.161698	0	--	--	--	--	--	--	--	--	--	PREDICTED: translation initiation factor IF-2-like [Malus domestica]
MD07G1250500	5.09236	2.05629	1.26916	1.65876	1.16402	1.27384	2.61485	2.009	3.38225	1.03972	1.01611	1.04765	--	--	--	--	--	--	Cyclic phosphodiesterase OS=Arabidopsis thaliana OX=3702 GN=At4g18930 PE=1 SV=1	S	Function unknown	PREDICTED: F-box/kelch-repeat protein At3g06240-like isoform X1 [Pyrus x bretschneideri]
MD09G1267500	2.35399	1.43643	2.04643	4.00924	1.93632	4.21947	2.37086	2.25418	3.86079	8.75371	6.73369	9.21069	--	--	--	--	--	--	--	S	Function unknown	PREDICTED: uncharacterized protein LOC103945928 [Pyrus x bretschneideri]
MD10G1265500	2.16035	2.09757	1.9671	0.787415	1.04634	0.446946	2.28901	3.26103	0.673088	0.344267	0.65136	0	--	--	--	--	--	--	Cysteine-rich repeat secretory protein 3 OS=Arabidopsis thaliana OX=3702 GN=CRRSP3 PE=1 SV=1	U	Intracellular trafficking, secretion, and vesicular transport	PREDICTED: cysteine-rich repeat secretory protein 56-like [Malus domestica]
MD12G1136500	2.36025	2.05341	1.17576	0.778956	0.478361	0.398592	2.26443	2.68403	1.16665	0.709319	0.51352	0.891497	--	--	--	K13174|5.22929e-76|mdm:103421133|K13174 THO complex subunit 5 | (RefSeq) THO complex subunit 5B-like	[S]	Function unknown	THO complex subunit 5B OS=Arabidopsis thaliana OX=3702 GN=THO5B PE=1 SV=1	U	Intracellular trafficking, secretion, and vesicular transport	PREDICTED: LOW QUALITY PROTEIN: THO complex subunit 5B-like [Malus domestica]
MD15G1342000	2.20728	5.00008	5.0343	0.150826	0.437706	0.302798	2.08069	2.06354	1.234	0.171809	0.304644	0.120105	[T]	Signal transduction mechanisms	--	--	--	--	Protein STRUBBELIG-RECEPTOR FAMILY 8 OS=Arabidopsis thaliana OX=3702 GN=SRF8 PE=2 SV=1	T	Signal transduction mechanisms	PREDICTED: protein STRUBBELIG-RECEPTOR FAMILY 8-like [Malus domestica]
MD01G1103500	0.996901	10.5167	4.92864	0	0	0	2.05848	3.14353	0.150269	0	0	0	--	--	--	--	--	--	Lipid transfer-like protein VAS OS=Arabidopsis thaliana OX=3702 GN=VAS PE=2 SV=1	U	Intracellular trafficking, secretion, and vesicular transport	PREDICTED: lipid transfer-like protein VAS [Malus domestica]
MD08G1173600	1.63057	6.20474	7.7606	0.994063	1.31696	2.04205	2.02754	4.57838	1.74872	2.51904	2.39675	2.28512	--	--	--	--	--	--	--	S	Function unknown	PREDICTED: uncharacterized protein LOC103943640 [Pyrus x bretschneideri]
MD15G1419800	4.20354	3.20921	4.06578	0.363845	0.390295	0.390588	2.0124	3.66209	1.35594	0.773126	0.35981	0.435013	--	--	--	--	--	--	--	--	--	PREDICTED: uncharacterized protein LOC108173532 [Malus domestica]
MD10G1098500	2.72111	2.79125	2.17956	3.62987	3.14218	2.23702	2.00894	3.04399	1.30316	2.6759	4.26179	2.42747	--	--	Cellular Component: membrane (GO:0016020);;	--	[S]	Function unknown	Protein FATTY ACID EXPORT 2, chloroplastic OS=Arabidopsis thaliana OX=3702 GN=FAX2 PE=2 SV=1	S	Function unknown	PREDICTED: protein FATTY ACID EXPORT 2, chloroplastic-like [Malus domestica]
MD13G1235500	2.15127	1.73351	0.860387	3.22063	3.1765	5.92255	1.83299	1.66127	1.22073	4.60199	5.04674	3.9016	[I]	Lipid transport and metabolism	Molecular Function: carboxylic ester hydrolase activity (GO:0004091);; Biological Process: metabolic process (GO:0008152);; Molecular Function: retinyl-palmitate esterase activity (GO:0050253);; Molecular Function: methyl indole-3-acetate esterase activity (GO:0080030);; Molecular Function: methyl salicylate esterase activity (GO:0080031);; Molecular Function: methyl jasmonate esterase activity (…	--	[V]	Defense mechanisms	Probable carboxylesterase 7 OS=Arabidopsis thaliana OX=3702 GN=CXE7 PE=2 SV=1	I	Lipid transport and metabolism	PREDICTED: probable carboxylesterase 7 [Malus domestica]
MD07G1002900	5.34809	3.07279	4.55036	4.20233	2.65637	2.39216	1.80597	2.33086	2.06677	2.8881	2.89097	1.18984	--	--	--	--	--	--	--	S	Function unknown	PREDICTED: uncharacterized protein LOC103440014 [Malus domestica]
MD13G1249800	1.48738	0.92968	1.53954	0.815503	0.681971	1.12867	1.78874	1.7632	1.00769	1.34149	1.64696	1.05124	--	--	--	--	--	--	AT-rich interactive domain-containing protein 1 OS=Arabidopsis thaliana OX=3702 GN=ARID1 PE=2 SV=1	K	Transcription	PREDICTED: AT-rich interactive domain-containing protein 1-like isoform X1 [Malus domestica]
MD09G1178200	1.74769	1.23261	2.39688	2.39497	1.6119	1.44851	1.78305	2.56506	4.76505	1.79574	2.9152	2.84371	[M]	Cell wall/membrane/envelope biogenesis	Molecular Function: protein serine/threonine kinase activity (GO:0004674);; Molecular Function: non-membrane spanning protein tyrosine kinase activity (GO:0004715);; Molecular Function: ATP binding (GO:0005524);; Biological Process: protein phosphorylation (GO:0006468);;	K04733|0|mdm:103445764|K04733 interleukin-1 receptor-associated kinase 4 [EC:2.7.11.1] | (RefSeq) putative serine/threonine-protein kinase	[T]	Signal transduction mechanisms	Cold-responsive protein kinase 1 OS=Arabidopsis thaliana OX=3702 GN=CRPK1 PE=1 SV=1	T	Signal transduction mechanisms	PREDICTED: putative serine/threonine-protein kinase isoform X1 [Malus domestica]
MD02G1234700	2.33474	2.12764	1.23672	0.763147	0.347839	0.892618	1.78167	3.09254	1.42101	0.618611	0.680253	0.565397	[K]	Transcription	Molecular Function: nucleotidyltransferase activity (GO:0016779);;	K10908|0|mdm:103456353|K10908 DNA-directed RNA polymerase, mitochondrial [EC:2.7.7.6] | (RefSeq) DNA-directed RNA polymerase 3, chloroplastic	[KL]	--	DNA-directed RNA polymerase 3, chloroplastic OS=Nicotiana sylvestris OX=4096 GN=RPOT3 PE=2 SV=1	K	Transcription	PREDICTED: LOW QUALITY PROTEIN: DNA-directed RNA polymerase 3, chloroplastic [Malus domestica]
MD03G1252200	0.490524	1.00558	0.602852	0.968405	0.513747	1.05009	1.7244	1.35435	0.479024	0.56665	0.937775	0.898359	--	--	--	--	--	--	--	--	--	PREDICTED: uncharacterized protein LOC108171998 isoform X1 [Malus domestica]
MD03G1217900	1.23954	0.743525	0.883067	1.31356	1.83467	2.49928	1.6268	2.21151	0.909753	3.71669	3.37604	1.636	--	--	--	--	--	--	--	--	--	PREDICTED: uncharacterized protein LOC103418326 [Malus domestica]
MD02G1116300	1.06606	2.12681	1.10315	2.40805	1.94565	1.16452	1.5941	1.87764	0.992377	0.534371	0.635657	1.19547	--	--	--	--	--	--	O-fucosyltransferase 7 OS=Arabidopsis thaliana OX=3702 GN=OFUT7 PE=2 SV=1	S	Function unknown	PREDICTED: uncharacterized protein At1g04910-like isoform X1 [Malus domestica]
MD13G1030300	3.23716	3.73806	3.78298	2.87798	2.00505	1.30305	1.50693	2.56399	4.39076	1.42067	3.27559	0.952807	[M]	Cell wall/membrane/envelope biogenesis	--	--	--	--	Protein TRIGALACTOSYLDIACYLGLYCEROL 1, chloroplastic OS=Arabidopsis thaliana OX=3702 GN=TGD1 PE=1 SV=1	Q	Secondary metabolites biosynthesis, transport and catabolism	PREDICTED: protein TRIGALACTOSYLDIACYLGLYCEROL 1, chloroplastic-like isoform X1 [Malus domestica]
MD08G1136600	1.45285	6.34946	50.4993	107.509	283.628	228.818	1.43257	10.9161	3.09844	139.489	184.464	70.0888	[Q]	Secondary metabolites biosynthesis, transport and catabolism	Biological Process: biosynthetic process (GO:0009058);; Molecular Function: naringenin-chalcone synthase activity (GO:0016210);;	K00660|0|pxb:103959489|K00660 chalcone synthase [EC:2.3.1.74] | (RefSeq) chalcone synthase-like	--	--	Polyketide synthase 1 OS=Rubus idaeus OX=32247 GN=PKS1 PE=1 SV=1	Q	Secondary metabolites biosynthesis, transport and catabolism	chalcone synthase [Malus domestica]
MD06G1229600	1.0748	1.19683	1.3021	6.76118	4.1363	6.36303	1.22342	1.15707	1.21274	3.32415	3.51742	3.89887	[G]	Carbohydrate transport and metabolism	--	--	--	--	Probable starch synthase 4, chloroplastic/amyloplastic OS=Arabidopsis thaliana OX=3702 GN=SS4 PE=1 SV=1	G	Carbohydrate transport and metabolism	PREDICTED: probable starch synthase 4, chloroplastic/amyloplastic [Malus domestica]
MD02G1120900	0.398146	1.6633	0.699769	0.493776	0.578148	1.01348	1.20643	1.35322	0.99053	0.378008	0.161201	0.30567	[R]	General function prediction only	Molecular Function: nucleotide binding (GO:0000166);; Biological Process: double-strand break repair via homologous recombination (GO:0000724);; Molecular Function: protein binding (GO:0005515);; Cellular Component: nucleus (GO:0005634);; Biological Process: nucleosome assembly (GO:0006334);; Biological Process: cell proliferation (GO:0008283);; Biological Process: pollen development (GO:0009555)…	K10751|2.05673e-87|mdm:103416160|K10751 chromatin assembly factor 1 subunit B | (RefSeq) chromatin assembly factor 1 subunit FAS2-like	[BL]	--	Chromatin assembly factor 1 subunit FAS2 OS=Arabidopsis thaliana OX=3702 GN=FAS2 PE=1 SV=1	S	Function unknown	PREDICTED: chromatin assembly factor 1 subunit FAS2-like isoform X2 [Malus domestica]
MD12G1164100	2.68533	9.60656	5.59288	0.29176	0.75418	0.737342	1.07573	4.53711	0.328607	0.316364	0.632411	0.238941	--	--	--	--	--	--	--	S	Function unknown	PREDICTED: uncharacterized protein LOC103455361 [Malus domestica]
MD13G1200700	1.66404	3.72033	1.67741	0.425688	0.752493	0.164328	0.922036	4.10249	0.693821	0	0	0	--	--	--	--	--	--	Protein MARD1 OS=Arabidopsis thaliana OX=3702 GN=MARD1 PE=2 SV=2	S	Function unknown	PREDICTED: protein MARD1-like [Malus domestica]
MD03G1072600	2.70523	1.59861	0.394888	1.78686	1.18022	1.75605	0.739389	2.32536	0.777638	2.13622	1.93261	1.59424	[T]	Signal transduction mechanisms	--	K08269|0|mdm:103433104|K08269 serine/threonine-protein kinase ULK/ATG1 [EC:2.7.11.1] | (RefSeq) serine/threonine-protein kinase ATG1t-like	[OUT]	--	Serine/threonine-protein kinase ATG1t OS=Arabidopsis thaliana OX=3702 GN=At1g49180 PE=2 SV=1	T	Signal transduction mechanisms	PREDICTED: serine/threonine-protein kinase ATG1t-like [Malus domestica]
MD02G1227800	3.66725	3.08675	2.14338	0.737985	1.99908	3.19487	0.594633	3.24945	4.20649	1.31333	1.92965	2.16438	--	--	--	--	--	--	Basic leucine zipper 23 OS=Arabidopsis thaliana OX=3702 GN=BZIP23 PE=2 SV=1	K	Transcription	PREDICTED: basic leucine zipper 23-like [Pyrus x bretschneideri]
MD04G1228600	0.830605	0.589378	0.135298	0.258795	0.231236	0.354321	0.462717	1.14507	0.776434	0.35391	0.189745	0.154579	--	--	--	--	[R]	General function prediction only	Retrovirus-related Pol polyprotein from transposon RE1 OS=Arabidopsis thaliana OX=3702 GN=RE1 PE=2 SV=1	--	--	PREDICTED: uncharacterized protein LOC103417107 [Malus domestica]
MD17G1056400	0.591187	0.19808	0.365062	0.422394	0.133342	0.067533	0.381469	0.651187	0.11623	0.424522	0.201017	0.204406	--	--	--	--	--	--	--	S	Function unknown	PREDICTED: uncharacterized protein LOC103956999 isoform X2 [Pyrus x bretschneideri]
MD03G1216500	1.3717	1.86098	0.979493	1.84554	1.59704	1.44325	0.285225	1.06828	0.682212	0.202745	0.654179	0.591533	--	--	--	--	--	--	--	S	Function unknown	PREDICTED: uncharacterized protein LOC103435832 [Malus domestica]
MD15G1402100	0.189093	3.98396	2.52546	0.20797	1.06457	0.523683	0.190489	0.422652	0.025977	0.052776	0.201634	0.017694	--	--	--	--	[U]	Intracellular trafficking, secretion, and vesicular transport	Vesicle-associated protein 2-2 OS=Arabidopsis thaliana OX=3702 GN=PVA22 PE=1 SV=1	U	Intracellular trafficking, secretion, and vesicular transport	PREDICTED: vesicle-associated protein 2-2-like [Malus domestica]
MD10G1195600	0.039105	0.030225	0.032939	0.019096	0.020973	0.053966	0.035791	0.059236	0.045086	0.021402	0.033984	0.027092	[O]	Posttranslational modification, protein turnover, chaperones	--	--	[T]	Signal transduction mechanisms	RHOMBOID-like protein 1 OS=Arabidopsis thaliana OX=3702 GN=RBL1 PE=2 SV=1	S	Function unknown	PREDICTED: RHOMBOID-like protein 1 isoform X2 [Malus domestica]
MD00G1093000	0	0	0.350155	0.036005	0.036645	0	0.016042	0.02734	0	0.031836	0	0.046218	--	--	Molecular Function: phospholipase A2 activity (GO:0004623);; Cellular Component: vacuole (GO:0005773);; Cellular Component: Golgi apparatus (GO:0005794);; Biological Process: phospholipid metabolic process (GO:0006644);; Biological Process: lipid catabolic process (GO:0016042);;	K01047|2.38791e-111|pxb:103939520|K01047 secretory phospholipase A2 [EC:3.1.1.4] | (RefSeq) phospholipase A2-alpha-like	--	--	Phospholipase A2-alpha OS=Arabidopsis thaliana OX=3702 GN=PLA2-ALPHA PE=1 SV=1	I	Lipid transport and metabolism	PREDICTED: phospholipase A2-alpha-like isoform X2 [Pyrus x bretschneideri]
MD05G1081400	0.222183	1.29281	0.740324	1.54528	1.60114	1.87048	0	0	0	0.429954	0.829061	0.327875	--	--	--	--	--	--	--	S	Function unknown	hypothetical protein PRUPE_6G274600 [Prunus persica]
MD09G1020500	0	0.582015	0.625914	0	0.601394	0.591094	0	0.484902	0.813933	0	0	0	--	--	--	--	--	--	--	S	Function unknown	PREDICTED: uncharacterized protein LOC103406088 [Malus domestica]
Md/Mb root-to-leaf	Md/Mb +24 h r1	Md/Mb +24 h r2	Md/Mb +24 h r3	Md/Mb +24 h L1	Md/Mb +24 h L2	Md/Mb +24 h L3	Md/Mb -24 h r1	Md/Mb -24 h r2	Md/Mb -24 h r3	Md/Mb -24 h L1	Md/Mb -24 h L2	Md/Mb -24 h L3	COG_class	COG_class_annotation	GO_annotation	KEGG_annotation	KOG_class	KOG_class_annotation	Swissprot_annotation	eggNOG_class	eggNOG_class_annotation	nr_annotation
MD02G1177700	133.745	194.138	101.807	487.405	279.796	495.815	95.1038	99.7187	148.239	746.991	751.129	638.373	[O]	Posttranslational modification, protein turnover, chaperones	Biological Process: proteolysis (GO:0006508);; Molecular Function: cysteine-type peptidase activity (GO:0008234);; Molecular Function: 2-alkenal reductase [NAD(P)] activity (GO:0032440);; Biological Process: oxidation-reduction process (GO:0055114);;	--	[O]	Posttranslational modification, protein turnover, chaperones	Probable cysteine protease RD21C OS=Arabidopsis thaliana OX=3702 GN=RD21C PE=1 SV=1	O	Posttranslational modification, protein turnover, chaperones	PREDICTED: cysteine proteinase COT44-like [Malus domestica]
MD05G1341800	103.89	77.7842	132.303	0.451527	0.689389	0.852347	78.9439	103.006	104.69	0.669546	1.04483	1.48715	[GI]	--	Molecular Function: enzyme inhibitor activity (GO:0004857);; Cellular Component: cell wall (GO:0005618);; Cellular Component: plasma membrane (GO:0005886);; Molecular Function: pectinesterase activity (GO:0030599);; Biological Process: cell wall modification (GO:0042545);; Biological Process: negative regulation of catalytic activity (GO:0043086);; Molecular Function: aspartyl esterase activity (…	K01051|0|mdm:103434528|K01051 pectinesterase [EC:3.1.1.11] | (RefSeq) pectinesterase	--	--	Pectinesterase/pectinesterase inhibitor OS=Ficus pumila var. awkeotsang OX=204231 PE=1 SV=1	G	Carbohydrate transport and metabolism	PREDICTED: pectinesterase [Malus domestica]
MD10G1084500	86.74	87.15	77.5322	62.208	59.5299	89.9119	76.0403	95.7735	81.4872	81.8254	73.7928	57.5082	--	--	Molecular Function: protein domain specific binding (GO:0019904);;	K06630|0|mdm:103449800|K06630 14-3-3 protein epsilon | (RefSeq) 14-3-3-like protein 16R	[O]	Posttranslational modification, protein turnover, chaperones	14-3-3 protein 6 OS=Solanum lycopersicum OX=4081 GN=TFT6 PE=2 SV=2	T	Signal transduction mechanisms	PREDICTED: 14-3-3-like protein 16R [Malus domestica]
MD02G1044400	57.6299	34.6468	73.7398	5.22864	7.60204	8.04303	64.22	84.3489	62.8763	6.2585	6.9705	9.62087	[S]	Function unknown	--	--	--	--	Protein CONTINUOUS VASCULAR RING 1 OS=Arabidopsis thaliana OX=3702 GN=COV1 PE=1 SV=2	S	Function unknown	PREDICTED: protein LIKE COV 1-like [Pyrus x bretschneideri]
MD11G1311200	67.8882	74.6979	70.5178	34.0114	31.2393	32.7763	58.4772	63.8308	69.3527	30.599	35.3734	33.8217	--	--	--	--	--	--	--	--	--	PREDICTED: uncharacterized protein LOC103413369 [Malus domestica]
MD10G1276900	53.7923	83.818	64.5869	40.1727	30.2944	46.1898	45.8697	58.6566	85.0482	30.8763	40.147	28.7961	[J]	Translation, ribosomal structure and biogenesis	Biological Process: RNA methylation (GO:0001510);; Molecular Function: structural constituent of ribosome (GO:0003735);; Cellular Component: nucleolus (GO:0005730);; Cellular Component: vacuole (GO:0005773);; Cellular Component: Golgi apparatus (GO:0005794);; Biological Process: translation (GO:0006412);; Cellular Component: plasmodesma (GO:0009506);; Cellular Component: chloroplast (GO:0009507);…	K02868|3.15736e-115|pxb:103944071|K02868 large subunit ribosomal protein L11e | (RefSeq) 60S ribosomal protein L11-1	[J]	Translation, ribosomal structure and biogenesis	60S ribosomal protein L11-1 OS=Arabidopsis thaliana OX=3702 GN=RPL11A PE=2 SV=2	J	Translation, ribosomal structure and biogenesis	PREDICTED: 60S ribosomal protein L11-1 [Malus domestica]
MD09G1254300	57.8717	38.9818	57.9118	15.5811	17.142	21.1908	59.5204	39.4781	51.9309	13.4661	15.9222	18.2047	--	--	--	--	--	--	Probable S-adenosylmethionine-dependent methyltransferase At5g38100 OS=Arabidopsis thaliana OX=3702 GN=At5g38100 PE=2 SV=1	S	Function unknown	PREDICTED: probable S-adenosylmethionine-dependent methyltransferase At5g38100 [Malus domestica]
MD07G1184300	32.7045	26.5025	41.0636	7.51013	13.3575	15.0601	44.9755	45.3726	34.4765	11.013	7.26685	8.7177	--	--	--	K12896|4.50044e-87|mdm:103434525|K12896 splicing factor, arginine/serine-rich 7 | (RefSeq) serine/arginine-rich splicing factor RS2Z33-like	[A]	RNA processing and modification	Serine/arginine-rich splicing factor RS2Z33 OS=Arabidopsis thaliana OX=3702 GN=RS2Z33 PE=1 SV=1	S	Function unknown	PREDICTED: serine/arginine-rich splicing factor RS2Z33-like isoform X1 [Malus domestica]
MD09G1202100	38.4782	37.1017	46.7328	13.9612	21.0045	16.7089	49.9502	40.583	27.8807	15.7689	16.2434	17.6338	[A]	RNA processing and modification	--	K14376|0|mdm:103443740|K14376 poly(A) polymerase [EC:2.7.7.19] | (RefSeq) nuclear poly(A) polymerase 4-like	[A]	RNA processing and modification	Nuclear poly(A) polymerase 4 OS=Arabidopsis thaliana OX=3702 GN=PAPS4 PE=1 SV=1	A	RNA processing and modification	PREDICTED: nuclear poly(A) polymerase 4-like isoform X1 [Malus domestica]
MD11G1132800	37.5442	44.6154	34.3397	31.0099	43.4271	51.1484	30.734	36.8155	41.7066	35.1945	42.7876	40.2608	--	--	--	K09481|1.26956e-35|mdm:103418826|K09481 protein transport protein SEC61 subunit beta | (RefSeq) protein transport protein Sec61 subunit beta-like	[O]	Posttranslational modification, protein turnover, chaperones	Protein transport protein Sec61 subunit beta OS=Arabidopsis thaliana OX=3702 GN=At2g45070 PE=1 SV=1	U	Intracellular trafficking, secretion, and vesicular transport	PREDICTED: protein transport protein Sec61 subunit beta-like [Malus domestica]
MD09G1197500	35.5578	23.428	43.3449	18.3024	15.8853	16.564	33.0264	36.5954	28.4552	13.161	14.5452	17.4378	[L]	Replication, recombination and repair	--	--	--	--	Jacalin-related lectin 19 OS=Arabidopsis thaliana OX=3702 GN=JAL19 PE=2 SV=1	S	Function unknown	PREDICTED: jacalin-related lectin 19-like [Malus domestica]
MD06G1160300	28.6569	20.7443	30.3269	9.68608	14.2778	17.4605	43.2246	26.9942	19.9785	9.95785	8.52341	9.18508	--	--	--	--	[T]	Signal transduction mechanisms	Eukaryotic translation initiation factor isoform 4G-1 OS=Arabidopsis thaliana OX=3702 GN=EIF(ISO)4G1 PE=1 SV=1	S	Function unknown	PREDICTED: programmed cell death protein 4 [Malus domestica]
MD02G1016700	20.8815	24.5449	29.5941	39.4023	35.5183	32.7071	18.3418	21.5963	47.6568	23.9031	35.5732	35.9036	--	--	--	--	--	--	--	S	Function unknown	PREDICTED: uncharacterized protein LOC103447424 [Malus domestica]
MD03G1228200	28.6012	21.3861	23.8067	9.23746	7.45779	8.84327	32.3889	30.3607	20.6774	9.50747	11.935	8.58535	--	--	Molecular Function: acetylglucosaminyltransferase activity (GO:0008375);; Cellular Component: membrane (GO:0016020);; Molecular Function: protein xylosyltransferase activity (GO:0030158);;	--	[G]	Carbohydrate transport and metabolism	Beta-glucuronosyltransferase GlcAT14A OS=Arabidopsis thaliana OX=3702 GN=GLCAT14A PE=2 SV=1	S	Function unknown	PREDICTED: beta-glucuronosyltransferase GlcAT14A-like [Malus domestica]
MD07G1118700	28.0592	21.5871	30.4188	12.7588	18.2981	13.6205	26.7902	26.1178	22.1079	10.6569	13.3659	15.3012	--	--	--	--	--	--	Protein GRAVITROPIC IN THE LIGHT 1 OS=Arabidopsis thaliana OX=3702 GN=GIL1 PE=2 SV=1	S	Function unknown	PREDICTED: uncharacterized protein LOC103436085 [Malus domestica]
MD09G1079400	34.6405	18.442	27.3641	3.42165	5.97732	2.1089	15.7291	19.0126	33.7134	1.53747	3.21035	5.52991	--	--	Molecular Function: protein serine/threonine kinase activity (GO:0004674);; Molecular Function: ATP binding (GO:0005524);; Biological Process: protein phosphorylation (GO:0006468);; Cellular Component: integral component of membrane (GO:0016021);; Molecular Function: 2-alkenal reductase [NAD(P)] activity (GO:0032440);; Biological Process: oxidation-reduction process (GO:0055114);;	--	--	--	Protein NSP-INTERACTING KINASE 1 OS=Arabidopsis thaliana OX=3702 GN=NIK1 PE=1 SV=1	T	Signal transduction mechanisms	PREDICTED: protein NSP-INTERACTING KINASE 1-like [Malus domestica]
MD15G1417700	25.0578	40.5089	21.1479	24.3471	18.8007	16.1251	26.548	20.6327	18.9979	19.3567	24.0192	18.1579	--	--	--	--	[R]	General function prediction only	Tubby-like F-box protein 8 OS=Oryza sativa subsp. japonica OX=39947 GN=TULP8 PE=2 SV=1	S	Function unknown	tubby-like F-box protein 8 [Malus domestica]
MD11G1001600	28.0175	71.3387	15.7699	34.8265	20.8701	40.8606	19.6261	15.8562	28.6826	30.5096	32.6072	39.324	[T]	Signal transduction mechanisms	--	K00873|9.38581e-133|mdm:103429773|K00873 pyruvate kinase [EC:2.7.1.40] | (RefSeq) pyruvate kinase, cytosolic isozyme	[G]	Carbohydrate transport and metabolism	Pyruvate kinase, cytosolic isozyme OS=Nicotiana tabacum OX=4097 PE=2 SV=1	G	Carbohydrate transport and metabolism	PREDICTED: pyruvate kinase, cytosolic isozyme [Malus domestica]
MD06G1193800	22.3509	20.4124	16.9559	9.39625	11.3642	11.2285	15.0476	20.765	26.46	8.6705	12.2358	10.7168	[C]	Energy production and conversion	--	K00026|0|mdm:103437822|K00026 malate dehydrogenase [EC:1.1.1.37] | (RefSeq) malate dehydrogenase, chloroplastic	[C]	Energy production and conversion	Malate dehydrogenase, chloroplastic OS=Arabidopsis thaliana OX=3702 GN=At3g47520 PE=1 SV=1	C	Energy production and conversion	PREDICTED: malate dehydrogenase, chloroplastic [Malus domestica]
MD10G1318600	14.7968	12.8826	17.9667	14.7172	11.0867	12.4404	18.8875	22.3063	19.1248	12.3811	18.7321	14.5941	--	--	--	--	--	--	Tobamovirus multiplication protein 1 OS=Nicotiana tabacum OX=4097 GN=TOM1 PE=1 SV=1	S	Function unknown	PREDICTED: tobamovirus multiplication protein 1 [Malus domestica]
MD09G1202700	31.8358	16.1365	21.3957	7.31651	12.6387	14.174	16.341	13.8519	26.4533	5.55953	5.76531	13.7332	--	--	--	--	--	--	--	S	Function unknown	PREDICTED: uncharacterized protein LOC103934518 isoform X1 [Pyrus x bretschneideri]
MD13G1285100	13.2617	29.6643	1.61602	725.77	178.632	450.931	2.38898	3.86643	47.5408	353.952	616.727	821.052	[Q]	Secondary metabolites biosynthesis, transport and catabolism	Biological Process: biosynthetic process (GO:0009058);; Molecular Function: naringenin-chalcone synthase activity (GO:0016210);;	K00660|0|pxb:103959489|K00660 chalcone synthase [EC:2.3.1.74] | (RefSeq) chalcone synthase-like	--	--	Polyketide synthase 1 OS=Rubus idaeus OX=32247 GN=PKS1 PE=1 SV=1	Q	Secondary metabolites biosynthesis, transport and catabolism	chalcone synthase [Malus domestica]
MD10G1042200	21.9484	15.5988	9.40638	7.48174	13.5325	7.44501	17.1799	17.9369	16.0862	14.055	16.7236	18.1354	[R]	General function prediction only	Molecular Function: oxidoreductase activity (GO:0016491);; Biological Process: oxidation-reduction process (GO:0055114);;	--	[GQ]	--	Uncharacterized oxidoreductase At4g09670 OS=Arabidopsis thaliana OX=3702 GN=At4g09670 PE=1 SV=1	S	Function unknown	PREDICTED: uncharacterized oxidoreductase At4g09670 [Pyrus x bretschneideri]
MD14G1157800	16.9741	37.0394	15.4769	9.36047	10.2537	10.3345	19.687	14.079	15.6307	12.6615	9.86211	10.4933	--	--	Cellular Component: exocyst (GO:0000145);; Cellular Component: cytosol (GO:0005829);; Cellular Component: plasma membrane (GO:0005886);; Biological Process: vesicle docking involved in exocytosis (GO:0006904);; Biological Process: response to high light intensity (GO:0009644);; Biological Process: response to hydrogen peroxide (GO:0042542);;	K07195|0|mdm:103454965|K07195 exocyst complex component 7 | (RefSeq) exocyst complex component EXO70B1-like	[U]	Intracellular trafficking, secretion, and vesicular transport	Exocyst complex component EXO70A1 OS=Arabidopsis thaliana OX=3702 GN=EXO70A1 PE=1 SV=1	S	Function unknown	PREDICTED: exocyst complex component EXO70B1-like [Malus domestica]
MD06G1203100	15.0383	17.1822	18.5705	8.19162	11.4742	9.84422	18.2674	17.2374	13.6943	7.61697	11.3947	8.90117	--	--	--	--	--	--	--	S	Function unknown	PREDICTED: uncharacterized protein LOC103937834 isoform X1 [Pyrus x bretschneideri]
MD03G1287200	19.1438	13.7101	19.3406	4.37646	4.63124	5.69554	15.5416	17.7826	15.0298	4.42588	5.11146	6.90623	[T]	Signal transduction mechanisms	Biological Process: response to stress (GO:0006950);;	--	--	--	Universal stress protein A-like protein OS=Arabidopsis thaliana OX=3702 GN=At3g01520 PE=1 SV=2	T	Signal transduction mechanisms	PREDICTED: universal stress protein PHOS34-like isoform X1 [Malus domestica]
MD16G1058700	5.90933	3.08886	8.6056	1.26175	2.31472	1.68078	18.3092	8.99418	16.2474	0.354528	1.73925	3.91306	--	--	--	--	--	--	Protein BIG GRAIN 1-like E OS=Arabidopsis thaliana OX=3702 GN=At1g69160 PE=2 SV=1	S	Function unknown	PREDICTED: protein BIG GRAIN 1-like E [Malus domestica]
MD09G1046600	16.968	12.3188	15.8092	3.13236	3.5545	3.6967	15.3211	14.0808	13.5594	2.39976	4.48614	3.56469	[T]	Signal transduction mechanisms	--	K04733|0|mdm:103421494|K04733 interleukin-1 receptor-associated kinase 4 [EC:2.7.11.1] | (RefSeq) probable receptor-like protein kinase At5g15080	[T]	Signal transduction mechanisms	Probable serine/threonine-protein kinase PIX7 OS=Arabidopsis thaliana OX=3702 GN=PIX7 PE=1 SV=1	T	Signal transduction mechanisms	PREDICTED: probable receptor-like protein kinase At5g15080 [Malus domestica]
MD10G1327900	12.1577	7.77819	13.0484	102.246	92.6817	100.218	12.459	12.8194	14.664	67.8004	91.2063	124.812	--	--	Molecular Function: structural molecule activity (GO:0005198);; Cellular Component: chloroplast (GO:0009507);; Molecular Function: 2-alkenal reductase [NAD(P)] activity (GO:0032440);; Biological Process: oxidation-reduction process (GO:0055114);;	--	--	--	Plastid-lipid-associated protein, chloroplastic OS=Citrus unshiu OX=55188 GN=PAP PE=2 SV=1	S	Function unknown	PREDICTED: plastid-lipid-associated protein, chloroplastic-like [Malus domestica]
MD07G1000400	14.0332	9.97031	13.4141	5.43435	7.11122	5.60059	13.9022	13.0526	10.4655	4.71872	6.12419	6.02245	--	--	Cellular Component: cytoplasm (GO:0005737);; Biological Process: proteolysis (GO:0006508);; Biological Process: autophagy (GO:0006914);; Molecular Function: cysteine-type peptidase activity (GO:0008234);; Biological Process: protein transport (GO:0015031);;	K08342|0|mdm:103409907|K08342 cysteine protease ATG4 [EC:3.4.22.-] | (RefSeq) cysteine protease ATG4-like	[ZU]	--	Cysteine protease ATG4 OS=Medicago truncatula OX=3880 GN=ATG4 PE=3 SV=1	O	Posttranslational modification, protein turnover, chaperones	PREDICTED: cysteine protease ATG4-like isoform X2 [Malus domestica]
MD17G1214100	13.0751	14.8017	14.7333	10.9098	10.9658	11.4406	13.0754	13.0903	9.71487	9.98226	10.588	7.38169	--	--	Molecular Function: nucleic acid binding (GO:0003676);;	--	[L]	Replication, recombination and repair	Zinc finger BED domain-containing protein DAYSLEEPER OS=Arabidopsis thaliana OX=3702 GN=HAT PE=1 SV=1	S	Function unknown	PREDICTED: zinc finger BED domain-containing protein DAYSLEEPER-like [Pyrus x bretschneideri]
MD07G1051200	6.85537	7.10776	11.792	2.79099	5.19835	3.78986	14.1419	11.8389	7.47705	1.46278	2.80363	3.92335	--	--	--	--	--	--	Protein TIC 214 OS=Ceratophyllum demersum OX=4428 GN=TIC214 PE=3 SV=1	--	--	PREDICTED: uncharacterized protein LOC103438639 [Malus domestica]
MD01G1103500	14.6287	18.4627	14.4397	15.8766	15.7224	18.377	14.1047	6.90536	12.3865	15.4781	17.4802	9.47177	[L]	Replication, recombination and repair	Cellular Component: ubiquitin ligase complex (GO:0000151);; Molecular Function: ubiquitin-protein transferase activity (GO:0004842);; Biological Process: protein ubiquitination (GO:0016567);;	--	[S]	Function unknown	U-box domain-containing protein 14 OS=Arabidopsis thaliana OX=3702 GN=PUB14 PE=1 SV=1	S	Function unknown	PREDICTED: U-box domain-containing protein 14 [Malus domestica]
MD08G1168200	11.2035	16.7216	12.8104	4.97813	6.08087	4.50925	11.0267	12.5286	8.90861	4.88575	6.18133	5.56415	[K]	Transcription	--	K18758|0|mdm:103448111|K18758 DIS3-like exonuclease 2 [EC:3.1.13.-] | (RefSeq) DIS3-like exonuclease 2	[J]	Translation, ribosomal structure and biogenesis	DIS3-like exonuclease 2 OS=Arabidopsis thaliana OX=3702 GN=SOV PE=1 SV=1	K	Transcription	PREDICTED: DIS3-like exonuclease 2 isoform X2 [Malus domestica]
MD15G1115600	12.4869	14.1399	14.7969	13.6562	12.0862	19.0775	13.6623	6.8015	11.6364	14.5384	14.5055	10.0243	--	--	--	--	[K]	Transcription	Transcription elongation factor TFIIS OS=Arabidopsis thaliana OX=3702 GN=TFIIS PE=1 SV=1	S	Function unknown	PREDICTED: uncharacterized protein LOC103456146 [Malus domestica]
MD15G1435100	11.675	9.77331	12.4048	1.40549	4.22652	4.72073	8.2463	12.2051	11.0451	2.96102	4.27801	5.93424	--	--	--	--	--	--	--	S	Function unknown	PREDICTED: uncharacterized protein LOC103944980 [Pyrus x bretschneideri]
MD04G1116400	17.9349	14.8205	12.032	7.06298	8.48139	9.60686	9.54478	7.84229	10.1083	9.73616	8.04892	6.52651	[P]	Inorganic ion transport and metabolism	Molecular Function: ATP binding (GO:0005524);; Biological Process: cation transport (GO:0006812);; Cellular Component: integral component of membrane (GO:0016021);; Molecular Function: cation-transporting ATPase activity (GO:0019829);; Molecular Function: metal ion binding (GO:0046872);;	K01537|0|mdm:103433354|K01537 Ca2+-transporting ATPase [EC:3.6.3.8] | (RefSeq) calcium-transporting ATPase 1, endoplasmic reticulum-type-like	[P]	Inorganic ion transport and metabolism	Calcium-transporting ATPase 4, endoplasmic reticulum-type OS=Arabidopsis thaliana OX=3702 GN=ECA4 PE=2 SV=2	P	Inorganic ion transport and metabolism	PREDICTED: calcium-transporting ATPase 1, endoplasmic reticulum-type-like [Malus domestica]
MD07G1238800	10.3193	4.64717	4.47077	1.86066	1.69906	0.935761	6.4204	5.77852	14.1207	0.333942	0.63896	1.35085	[QV]	--	--	K20661|0|mdm:103439561|K20661 cytochrome P450 family 714 subfamily A polypeptide 1 | (RefSeq) cytochrome P450 714A1-like	[QI]	--	Cytochrome P450 714A1 OS=Arabidopsis thaliana OX=3702 GN=CYP714A1 PE=2 SV=1	Q	Secondary metabolites biosynthesis, transport and catabolism	PREDICTED: cytochrome P450 714A1-like [Malus domestica]
MD05G1251300	10.0167	12.3192	7.59607	10.8163	11.9001	10.4336	6.32578	8.05663	11.7229	10.0044	12.7491	9.9884	[O]	Posttranslational modification, protein turnover, chaperones	Molecular Function: threonine-type endopeptidase activity (GO:0004298);; Cellular Component: nucleus (GO:0005634);; Biological Process: ubiquitin-dependent protein catabolic process (GO:0006511);; Biological Process: response to zinc ion (GO:0010043);; Cellular Component: proteasome core complex, alpha-subunit complex (GO:0019773);; Cellular Component: cytosolic ribosome (GO:0022626);; Biological…	K02726|4.50611e-171|pxb:103945158|K02726 20S proteasome subunit alpha 2 [EC:3.4.25.1] | (RefSeq) proteasome subunit alpha type-2-B	[O]	Posttranslational modification, protein turnover, chaperones	Proteasome subunit alpha type-2-B OS=Arabidopsis thaliana OX=3702 GN=PAB2 PE=1 SV=1	O	Posttranslational modification, protein turnover, chaperones	PREDICTED: proteasome subunit alpha type-2-B [Malus domestica]
MD12G1165800	1.19849	0.141665	2.07168	4.18795	13.8875	5.31762	4.06912	4.36562	1.89618	0.435709	3.12567	1.44643	[P]	Inorganic ion transport and metabolism	Biological Process: calcium ion transport (GO:0006816);; Molecular Function: calcium:proton antiporter activity (GO:0015369);; Cellular Component: integral component of membrane (GO:0016021);; Biological Process: transmembrane transport (GO:0055085);;	K07300|0|mdm:103450620|K07300 Ca2+:H+ antiporter | (RefSeq) vacuolar cation/proton exchanger 3-like	[P]	Inorganic ion transport and metabolism	Vacuolar cation/proton exchanger 3 OS=Arabidopsis thaliana OX=3702 GN=CAX3 PE=1 SV=1	P	Inorganic ion transport and metabolism	PREDICTED: vacuolar cation/proton exchanger 3-like [Malus domestica]
MD07G1011300	5.40146	4.59819	5.43621	0.505849	0.692282	0.707907	5.66711	8.7716	10.1976	0.206729	0.192192	1.20999	--	--	--	K08064|2.62406e-169|pxb:103945884|K08064 nuclear transcription factor Y, alpha | (RefSeq) nuclear transcription factor Y subunit A-1-like	[K]	Transcription	Nuclear transcription factor Y subunit A-7 OS=Arabidopsis thaliana OX=3702 GN=NFYA7 PE=1 SV=1	K	Transcription	PREDICTED: nuclear transcription factor Y subunit A-1-like isoform X1 [Pyrus x bretschneideri]
MD10G1238800	2.08796	2.81526	5.14895	221.406	360.793	164.783	4.88102	5.3772	14.1811	46.6772	147.429	322.363	--	--	Cellular Component: photosystem I reaction center (GO:0009538);; Biological Process: photosynthesis (GO:0015979);;	K02694|3.46134e-166|mdm:103446065|K02694 photosystem I subunit III | (RefSeq) photosystem I reaction center subunit III, chloroplastic	--	--	Photosystem I reaction center subunit III, chloroplastic OS=Arabidopsis thaliana OX=3702 GN=PSAF PE=1 SV=1	S	Function unknown	PREDICTED: photosystem I reaction center subunit III, chloroplastic [Malus domestica]
MD08G1108800	7.01059	4.84091	7.05895	6.9414	6.31454	6.72962	8.21595	9.18596	6.58582	4.25342	5.63749	7.12402	[J]	Translation, ribosomal structure and biogenesis	Molecular Function: ATP binding (GO:0005524);; Cellular Component: mitochondrion (GO:0005739);; Biological Process: regulation of translational fidelity (GO:0006450);; Cellular Component: chloroplast (GO:0009507);; Cellular Component: glutamyl-tRNA(Gln) amidotransferase complex (GO:0030956);; Biological Process: mitochondrial translation (GO:0032543);; Molecular Function: glutaminyl-tRNA synthase…	K02435|2.07853e-76|pxb:103959519|K02435 aspartyl-tRNA(Asn)/glutamyl-tRNA(Gln) amidotransferase subunit C [EC:6.3.5.6 6.3.5.7] | (RefSeq) glutamyl-tRNA(Gln) amidotransferase subunit C, chloroplastic/mitochondrial-like	[YU]	--	Glutamyl-tRNA(Gln) amidotransferase subunit C, chloroplastic/mitochondrial OS=Vitis vinifera OX=29760 GN=GATC PE=3 SV=1	U	Intracellular trafficking, secretion, and vesicular transport	PREDICTED: glutamyl-tRNA(Gln) amidotransferase subunit C, chloroplastic/mitochondrial-like [Pyrus x bretschneideri]
MD07G1133800	9.95717	17.659	7.84396	8.17746	6.80438	5.9159	8.30098	8.3162	7.19593	5.79278	6.76354	4.62457	--	--	--	--	--	--	--	S	Function unknown	PREDICTED: uncharacterized protein LOC103439220 [Malus domestica]
MD09G1239500	9.48468	8.70854	9.03785	4.71131	5.55881	6.24202	7.21187	6.63353	7.53413	3.22594	5.04764	5.54765	--	--	Biological Process: endocytosis (GO:0006897);; Cellular Component: membrane (GO:0016020);;	K20069|2.75656e-152|mdm:103444420|K20069 adaptin ear-binding coat-associated protein 1/2 | (RefSeq) uncharacterized protein At1g03900-like	[S]	Function unknown	Uncharacterized protein At1g03900 OS=Arabidopsis thaliana OX=3702 GN=At1g03900 PE=2 SV=1	S	Function unknown	PREDICTED: uncharacterized protein At1g03900-like [Malus domestica]
MD13G1070900	11.9344	8.7531	14.4969	5.90898	6.66633	3.26612	5.41371	7.02312	6.7905	1.20753	3.00513	4.38784	--	--	--	--	--	--	Myb family transcription factor PHL8 OS=Arabidopsis thaliana OX=3702 GN=PHL8 PE=2 SV=1	K	Transcription	PREDICTED: uncharacterized protein LOC103451811 [Malus domestica]
MD16G1065800	6.27882	7.18372	5.51853	5.51421	6.38605	4.51063	3.75319	5.93944	9.30273	3.55279	5.18915	8.73223	--	--	--	--	--	--	Uncharacterized protein At5g01610 OS=Arabidopsis thaliana OX=3702 GN=At5g01610 PE=1 SV=1	S	Function unknown	PREDICTED: uncharacterized protein At5g01610 [Malus domestica]
MD10G1287900	6.23065	5.61762	4.08169	2.22996	3.66702	1.73468	3.55465	4.16437	11.2727	1.90551	2.99958	3.6638	--	--	Molecular Function: DNA binding (GO:0003677);; Cellular Component: nucleus (GO:0005634);; Biological Process: regulation of transcription, DNA-templated (GO:0006355);; Biological Process: response to hormone (GO:0009725);;	K14486|0|mdm:103446364|K14486 auxin response factor | (RefSeq) ARF3; auxin response factor 3	--	--	Auxin response factor 3 OS=Arabidopsis thaliana OX=3702 GN=ARF3 PE=1 SV=2	K	Transcription	auxin response factor 3 [Malus domestica]
MD11G1034800	5.31661	3.44193	5.64208	2.13306	2.63281	2.5263	7.42806	5.37489	5.35414	1.75799	2.99508	2.37588	--	--	--	--	[T]	Signal transduction mechanisms	Oligopeptide transporter 5 OS=Arabidopsis thaliana OX=3702 GN=OPT5 PE=2 SV=1	S	Function unknown	PREDICTED: oligopeptide transporter 1-like [Pyrus x bretschneideri]
MD03G1164600	3.7992	2.91868	5.15936	2.3305	4.45758	3.13403	6.50495	5.72493	5.2764	1.28477	1.89524	3.95129	--	--	--	--	--	--	F-box protein At2g32560 OS=Arabidopsis thaliana OX=3702 GN=At2g32560 PE=2 SV=1	S	Function unknown	PREDICTED: F-box protein At2g26850-like [Pyrus x bretschneideri]
MD11G1151200	5.04833	3.82752	6.49765	66.8324	81.3351	55.8343	4.52285	6.97795	5.2242	33.9645	51.5532	73.5108	[G]	Carbohydrate transport and metabolism	--	K01188|0|mdm:103448033|K01188 beta-glucosidase [EC:3.2.1.21] | (RefSeq) beta-glucosidase 11-like	[G]	Carbohydrate transport and metabolism	Beta-glucosidase 11 OS=Arabidopsis thaliana OX=3702 GN=BGLU11 PE=2 SV=2	G	Carbohydrate transport and metabolism	PREDICTED: beta-glucosidase 11-like isoform X1 [Malus domestica]
MD09G1024300	5.96478	2.77696	4.62281	0.882825	0.766981	0.940829	3.42606	9.57022	2.90697	0.450761	1.43545	1.41645	[C]	Energy production and conversion	--	--	--	--	--	S	Function unknown	PREDICTED: altered inheritance of mitochondria protein 32-like isoform X2 [Pyrus x bretschneideri]
MD02G1194600	14.6058	7.79687	9.44136	3.15081	4.88906	3.07216	3.56769	4.05346	8.23597	0.709039	1.98876	4.16738	[K]	Transcription	Molecular Function: protein serine/threonine kinase activity (GO:0004674);; Molecular Function: ATP binding (GO:0005524);; Biological Process: protein phosphorylation (GO:0006468);; Cellular Component: integral component of membrane (GO:0016021);;	--	--	--	Leucine-rich repeat receptor-like serine/threonine-protein kinase BAM1 OS=Arabidopsis thaliana OX=3702 GN=BAM1 PE=1 SV=1	S	Function unknown	PREDICTED: leucine-rich repeat receptor-like serine/threonine-protein kinase BAM1 [Malus domestica]
MD16G1101500	6.67125	6.28067	7.30674	6.36048	8.92517	9.41231	3.358	6.05538	5.75684	7.6324	11.2762	8.96991	[Q]	Secondary metabolites biosynthesis, transport and catabolism	Molecular Function: oxidoreductase activity (GO:0016491);; Biological Process: oxidation-reduction process (GO:0055114);;	--	[R]	General function prediction only	Non-functional NADPH-dependent codeinone reductase 2 OS=Papaver somniferum OX=3469 GN=COR2 PE=1 SV=1	S	Function unknown	PREDICTED: non-functional NADPH-dependent codeinone reductase 2-like [Malus domestica]
MD17G1156300	14.3968	3.05998	7.07327	0.139822	0.194108	0	3.86785	4.1474	5.256	0	0	0	[H]	Coenzyme transport and metabolism	Molecular Function: methionine adenosyltransferase activity (GO:0004478);; Molecular Function: ATP binding (GO:0005524);; Cellular Component: cytoplasm (GO:0005737);; Biological Process: S-adenosylmethionine biosynthetic process (GO:0006556);; Biological Process: one-carbon metabolic process (GO:0006730);; Molecular Function: metal ion binding (GO:0046872);;	K00789|2.63102e-69|mdm:103436288|K00789 S-adenosylmethionine synthetase [EC:2.5.1.6] | (RefSeq) S-adenosylmethionine synthase 4-like	[H]	Coenzyme transport and metabolism	S-adenosylmethionine synthase 2 OS=Catharanthus roseus OX=4058 GN=SAMS2 PE=1 SV=1	H	Coenzyme transport and metabolism	PREDICTED: S-adenosylmethionine synthase 4-like [Malus domestica]
MD02G1182500	2.13256	0.450892	4.49394	23.7016	36.5347	26.0265	4.494	4.30111	3.63697	12.5477	24.2637	30.9414	--	--	--	--	--	--	BTB/POZ domain-containing protein SR1IP1 OS=Arabidopsis thaliana OX=3702 GN=SR1IP1 PE=1 SV=2	S	Function unknown	PREDICTED: BTB/POZ domain-containing protein At5g67385-like [Malus domestica]
MD12G1036800	4.3392	3.16603	4.4314	5.67956	9.70624	6.19592	3.65853	3.94179	3.63246	6.64543	5.22528	5.24852	[O]	Posttranslational modification, protein turnover, chaperones	Molecular Function: electron carrier activity (GO:0009055);; Cellular Component: chloroplast thylakoid membrane (GO:0009535);; Cellular Component: chloroplast envelope (GO:0009941);; Molecular Function: protein disulfide oxidoreductase activity (GO:0015035);; Biological Process: photosynthesis, light reaction (GO:0019684);; Biological Process: regulation of protein dephosphorylation (GO:0035304);…	--	--	--	--	S	Function unknown	PREDICTED: uncharacterized protein LOC103423192 [Malus domestica]
MD11G1022800	2.54316	2.29092	2.33966	3.06501	3.77184	1.37438	2.4362	2.65733	4.61696	0.891417	2.53924	5.87042	[R]	General function prediction only	Molecular Function: nucleotide binding (GO:0000166);; Cellular Component: cytosol (GO:0005829);; Molecular Function: oxidoreductase activity (GO:0016491);; Biological Process: oxidation-reduction process (GO:0055114);;	--	[R]	General function prediction only	--	S	Function unknown	PREDICTED: uncharacterized protein LOC103422579 isoform X1 [Malus domestica]
MD05G1312400	4.42765	2.52007	4.57523	0	2.56535	0	2.09686	3.48889	4.08942	0	0	0	--	--	--	--	--	--	Dof zinc finger protein DOF1.4 OS=Arabidopsis thaliana OX=3702 GN=DOF1.4 PE=2 SV=1	S	Function unknown	PREDICTED: dof zinc finger protein DOF1.4-like [Malus domestica]
MD14G1122000	3.39843	3.74661	4.07681	2.23181	3.98955	2.70961	2.70721	3.1699	3.29764	1.61837	2.96613	3.38707	--	--	Biological Process: amino acid transmembrane transport (GO:0003333);; Cellular Component: plasma membrane (GO:0005886);; Molecular Function: amino acid transmembrane transporter activity (GO:0015171);; Biological Process: proline transport (GO:0015824);; Cellular Component: integral component of membrane (GO:0016021);;	--	[E]	Amino acid transport and metabolism	Probable GABA transporter 2 OS=Arabidopsis thaliana OX=3702 GN=At5g41800 PE=1 SV=1	E	Amino acid transport and metabolism	PREDICTED: probable GABA transporter 2 [Pyrus x bretschneideri]
MD02G1106000	2.00016	2.46911	2.3424	3.83635	2.68582	3.44188	2.69928	3.86007	2.52224	2.7041	3.18728	4.10563	--	--	Cellular Component: membrane (GO:0016020);;	--	[S]	Function unknown	Protein FATTY ACID EXPORT 2, chloroplastic OS=Arabidopsis thaliana OX=3702 GN=FAX2 PE=2 SV=1	S	Function unknown	PREDICTED: protein FATTY ACID EXPORT 2, chloroplastic-like [Malus domestica]
MD08G1077300	3.45596	1.54977	2.77767	13.7191	14.0849	11.8168	3.56176	1.96598	3.49705	6.50744	8.37293	16.2902	--	--	Biological Process: cellular process (GO:0009987);;	--	--	--	--	S	Function unknown	PREDICTED: uncharacterized protein LOC103443114 [Malus domestica]
MD06G1174300	2.52751	4.69693	5.05412	0.705172	2.08501	3.95357	1.04026	2.51947	4.9773	1.68223	1.32906	0.676973	[J]	Translation, ribosomal structure and biogenesis	Cellular Component: exosome (RNase complex) (GO:0000178);; Molecular Function: RNA binding (GO:0003723);;	K03681|3.56065e-166|mdm:103428292|K03681 exosome complex component RRP40 | (RefSeq) putative exosome complex component rrp40	[J]	Translation, ribosomal structure and biogenesis	--	J	Translation, ribosomal structure and biogenesis	PREDICTED: LOW QUALITY PROTEIN: putative exosome complex component rrp40 [Malus domestica]
MD02G1155000	1.98687	4.04724	1.08709	6.98325	6.97079	7.84253	3.11527	1.76672	3.59755	7.2439	19.3883	16.1273	--	--	--	K20858|0|mdm:103401919|K20858 calcium uniporter protein, mitochondrial | (RefSeq) calcium uniporter protein 2, mitochondrial	[R]	General function prediction only	Calcium uniporter protein 2, mitochondrial OS=Arabidopsis thaliana OX=3702 GN=At2g23790 PE=2 SV=1	S	Function unknown	PREDICTED: calcium uniporter protein 2, mitochondrial [Malus domestica]
MD03G1169200	2.01451	1.80339	2.46976	17.461	20.8858	15.9778	2.9171	2.97793	2.5291	10.1297	16.3166	26.8468	[R]	General function prediction only	Molecular Function: nucleotide binding (GO:0000166);; Molecular Function: 3-beta-hydroxy-delta5-steroid dehydrogenase activity (GO:0003854);; Biological Process: steroid biosynthetic process (GO:0006694);; Cellular Component: chloroplast stroma (GO:0009570);; Cellular Component: chloroplast envelope (GO:0009941);; Biological Process: oxidation-reduction process (GO:0055114);;	--	[G]	Carbohydrate transport and metabolism	Sanguinarine reductase OS=Eschscholzia californica OX=3467 GN=SARED1 PE=1 SV=1	GM	--	PREDICTED: sanguinarine reductase-like [Pyrus x bretschneideri]
MD06G1208300	3.00065	8.73571	2.11194	11.1782	4.60561	6.71895	2.07765	1.93803	3.997	7.26688	12.3015	11.4819	[G]	Carbohydrate transport and metabolism	Cellular Component: phosphopyruvate hydratase complex (GO:0000015);; Molecular Function: magnesium ion binding (GO:0000287);; Molecular Function: phosphopyruvate hydratase activity (GO:0004634);; Biological Process: glycolytic process (GO:0006096);;	K01689|0|mdm:103437941|K01689 enolase [EC:4.2.1.11] | (RefSeq) enolase 1, chloroplastic-like	[G]	Carbohydrate transport and metabolism	Enolase 1, chloroplastic OS=Arabidopsis thaliana OX=3702 GN=ENO1 PE=1 SV=1	G	Carbohydrate transport and metabolism	PREDICTED: enolase 1, chloroplastic-like [Malus domestica]
MD03G1028000	3.08456	2.65058	3.25963	0.078433	0.290785	0.20984	2.71153	2.16613	2.8698	0.200613	0	0.255449	--	--	--	--	--	--	F-box/kelch-repeat protein At3g06240 OS=Arabidopsis thaliana OX=3702 GN=At3g06240 PE=2 SV=1	S	Function unknown	PREDICTED: F-box/kelch-repeat protein At3g06240-like [Pyrus x bretschneideri]
MD12G1145700	2.43752	1.37547	2.34136	3.61709	5.17582	3.33869	3.2956	2.33415	1.97547	1.88881	3.57512	7.35586	--	--	--	--	--	--	--	S	Function unknown	PREDICTED: uncharacterized protein LOC103450258 [Malus domestica]
MD08G1123400	1.90226	0.991135	2.36236	0.708227	1.36476	0.704527	3.28096	2.14638	1.43814	0.689376	0.572893	0.362839	--	--	Molecular Function: transferase activity, transferring hexosyl groups (GO:0016758);;	--	[GMW]	--	Glycosyltransferase family protein 64 C3 OS=Arabidopsis thaliana OX=3702 GN=At1g80290 PE=2 SV=1	S	Function unknown	PREDICTED: glycosyltransferase family protein 64 C3-like [Malus domestica]
MD03G1269000	3.05557	2.41335	2.7786	2.1584	2.36849	1.33647	2.51759	1.99117	2.3131	1.88187	2.12997	1.77881	--	--	--	--	--	--	Mediator of RNA polymerase II transcription subunit 33A OS=Arabidopsis thaliana OX=3702 GN=MED33A PE=1 SV=1	S	Function unknown	PREDICTED: mediator of RNA polymerase II transcription subunit 33B-like [Malus domestica]
MD15G1161200	2.56826	3.17141	1.76202	4.24983	3.74483	6.00112	2.45055	1.73397	2.30692	9.2202	8.43754	6.04612	--	--	--	--	--	--	--	S	Function unknown	PREDICTED: uncharacterized protein LOC103431394 [Malus domestica]
MD02G1036500	1.01395	0.904957	0.769784	2.03136	2.32385	2.58344	1.07789	2.22648	3.07465	2.07921	3.48944	2.68879	--	--	--	--	--	--	--	S	Function unknown	PREDICTED: uncharacterized protein LOC103448342 [Malus domestica]
MD17G1050800	1.47998	2.65675	1.26034	2.88935	3.34067	3.18501	1.97906	1.7306	2.0936	2.65896	2.47701	3.94305	--	--	--	--	--	--	--	S	Function unknown	PREDICTED: uncharacterized protein LOC103404439 [Malus domestica]
MD16G1141000	0.985522	0.48304	2.10553	2.5152	2.20286	2.19722	1.71815	2.17474	1.62787	0.988485	1.95392	2.61938	[S]	Function unknown	--	--	--	--	--	S	Function unknown	PREDICTED: uncharacterized protein LOC103950437 [Pyrus x bretschneideri]
MD00G1089600	1.59618	1.50546	1.46197	1.7435	2.35557	1.437	0.556801	1.26332	3.58619	0.971782	1.91522	3.00208	--	--	--	K08472|0|mdm:103448665|K08472 mlo protein | (RefSeq) MLO-like protein 11	--	--	MLO-like protein 11 OS=Arabidopsis thaliana OX=3702 GN=MLO11 PE=2 SV=1	D	Cell cycle control, cell division, chromosome partitioning	PREDICTED: MLO-like protein 11 isoform X2 [Malus domestica]
MD15G1002400	1.53129	1.37748	2.00191	1.75653	1.27442	0.783519	1.67908	1.38007	2.1685	0.313223	0.728665	1.41204	--	--	--	--	--	--	O-fucosyltransferase 16 OS=Arabidopsis thaliana OX=3702 GN=OFUT16 PE=2 SV=1	S	Function unknown	PREDICTED: uncharacterized protein At1g04910-like [Malus domestica]
MD08G1012000	0.760407	0.861509	1.43369	2.1518	3.71526	3.81641	1.65847	1.13828	1.52235	1.22145	4.16739	2.74852	--	--	--	--	[Z]	Cytoskeleton	--	Z	Cytoskeleton	PREDICTED: uncharacterized protein LOC103440251 isoform X2 [Malus domestica]
MD11G1140600	1.21497	0.974497	1.40989	0.232178	0.525655	0.386427	0.651406	0.333869	2.56642	0.288128	0.182135	0.447094	--	--	--	--	[K]	Transcription	BEL1-like homeodomain protein 8 OS=Arabidopsis thaliana OX=3702 GN=BLH8 PE=1 SV=1	K	Transcription	PREDICTED: BEL1-like homeodomain protein 9 isoform X2 [Malus domestica]
MD09G1110300	0.260404	4.25358	0.173618	8.48766	4.46552	1.329	0.169787	1.17986	1.82797	0.682134	4.09205	1.52377	--	--	--	--	--	--	5&apos;-adenylylsulfate reductase 1, chloroplastic OS=Arabidopsis thaliana OX=3702 GN=APR1 PE=1 SV=2	P	Inorganic ion transport and metabolism	PREDICTED: 5&apos;-adenylylsulfate reductase 1, chloroplastic-like [Malus domestica]
MD05G1052400	1.22496	0.099204	0.538758	0.352721	1.97389	0.685714	1.3561	0.670209	1.08814	0	0.23221	1.14284	--	--	--	K14488|7.76326e-59|pxb:103938999|K14488 SAUR family protein | (RefSeq) indole-3-acetic acid-induced protein ARG7-like	--	--	Indole-3-acetic acid-induced protein ARG7 OS=Vigna radiata var. radiata OX=3916 GN=ARG7 PE=2 SV=1	S	Function unknown	PREDICTED: indole-3-acetic acid-induced protein ARG7-like [Pyrus x bretschneideri]
MD09G1051700	0.472962	0.774814	0.770265	0.37388	1.75093	0.342738	1.01472	0.993205	1.01177	0.31185	0.648524	0.56024	--	--	Molecular Function: metalloendopeptidase activity (GO:0004222);; Molecular Function: ATP binding (GO:0005524);; Biological Process: proteolysis (GO:0006508);; Molecular Function: microtubule-severing ATPase activity (GO:0008568);; Cellular Component: membrane (GO:0016020);; Biological Process: protein catabolic process (GO:0030163);; Biological Process: cell division (GO:0051301);;	--	[R]	General function prediction only	Pentatricopeptide repeat-containing protein At2g36730 OS=Arabidopsis thaliana OX=3702 GN=PCMP-E44 PE=3 SV=1	S	Function unknown	PREDICTED: LOW QUALITY PROTEIN: ATP-dependent zinc metalloprotease FTSH 6, chloroplastic [Malus domestica]
MD14G1060200	1.95955	0.785751	2.12332	1.71909	4.31688	0.933442	0.952394	0.888237	1.16401	0.123875	0.635808	1.01294	--	--	Molecular Function: DNA binding (GO:0003677);; Cellular Component: nucleus (GO:0005634);;	--	--	--	Squamosa promoter-binding-like protein 14 OS=Oryza sativa subsp. japonica OX=39947 GN=SPL14 PE=2 SV=1	K	Transcription	PREDICTED: squamosa promoter-binding-like protein 9 [Malus domestica]
MD10G1288900	0	0.306414	0.973428	0.213712	0	0.241076	0.87996	1.21924	0.753963	0	0	0.788691	--	--	--	--	[R]	General function prediction only	Pentatricopeptide repeat-containing protein At5g46100 OS=Arabidopsis thaliana OX=3702 GN=At5g46100 PE=2 SV=1	S	Function unknown	PREDICTED: pentatricopeptide repeat-containing protein At5g46100 [Malus domestica]
MD04G1005000	0.746675	0.228713	0.960972	4.40563	5.35533	3.04699	0.377777	0.985	1.03156	1.32471	3.60317	4.76952	--	--	--	--	--	--	Protein disulfide isomerase pTAC5, chloroplastic OS=Arabidopsis thaliana OX=3702 GN=PTAC5 PE=1 SV=1	S	Function unknown	PREDICTED: uncharacterized protein LOC103443498 isoform X4 [Malus domestica]
MD05G1019700	1.27384	0.893363	1.87965	0.483425	0.775752	0.596778	0.326412	0.850556	1.00121	0.166313	0.956456	0.456426	[K]	Transcription	--	--	--	--	Disease resistance-like protein DSC1 OS=Arabidopsis thaliana OX=3702 GN=DSC1 PE=1 SV=1	S	Function unknown	PREDICTED: TMV resistance protein N-like [Malus domestica]
MD13G1004200	1.47208	1.51937	0.365135	2.56773	2.20162	1.83111	0.366112	0.020523	1.77468	3.53359	1.6003	1.42443	[E]	Amino acid transport and metabolism	Molecular Function: serine-type carboxypeptidase activity (GO:0004185);; Biological Process: proteolysis (GO:0006508);;	K16297|0|mdm:103425597|K16297 serine carboxypeptidase-like clade II [EC:3.4.16.-] | (RefSeq) serine carboxypeptidase-like 34	[OE]	--	Serine carboxypeptidase-like 34 OS=Arabidopsis thaliana OX=3702 GN=SCPL34 PE=2 SV=2	E	Amino acid transport and metabolism	PREDICTED: serine carboxypeptidase-like 34 [Malus domestica]
MD15G1206700	0.076418	0.225911	0.438146	15.3349	30.2424	23.5204	0.050276	0.368694	1.47174	8.71293	11.5629	23.0876	--	--	Molecular Function: transcription factor activity, sequence-specific DNA binding (GO:0003700);; Biological Process: regulation of transcription, DNA-templated (GO:0006355);; Molecular Function: zinc ion binding (GO:0008270);; Molecular Function: sequence-specific DNA binding (GO:0043565);;	--	[K]	Transcription	Putative GATA transcription factor 22 OS=Arabidopsis thaliana OX=3702 GN=GATA22 PE=3 SV=1	K	Transcription	transcription factor GATA-5 [Malus domestica]
MD12G1204000	0.434039	0.615391	0.220662	2.82779	2.52498	2.47829	0.595952	0.698377	0.542722	1.25338	2.96148	2.93786	[O]	Posttranslational modification, protein turnover, chaperones	Biological Process: protein peptidyl-prolyl isomerization (GO:0000413);; Molecular Function: peptidyl-prolyl cis-trans isomerase activity (GO:0003755);; Biological Process: protein folding (GO:0006457);;	K12733|1.06327e-81|mdm:103413940|K12733 peptidyl-prolyl cis-trans isomerase-like 1 [EC:5.2.1.8] | (RefSeq) peptidyl-prolyl cis-trans isomerase CYP18-2-like	[O]	Posttranslational modification, protein turnover, chaperones	Peptidyl-prolyl cis-trans isomerase CYP18-2 OS=Arabidopsis thaliana OX=3702 GN=CYP18-2 PE=2 SV=1	O	Posttranslational modification, protein turnover, chaperones	PREDICTED: peptidyl-prolyl cis-trans isomerase CYP18-2-like [Malus domestica]
Apple_newGene_90361	0.678154	0.346473	0.752294	0.746967	1.14613	0.833104	0.792327	0.570591	0.359516	0.852153	1.21101	0.806117	--	--	--	--	--	--	--	--	--	PREDICTED: uncharacterized protein LOC103449565 [Malus domestica]
MD11G1285100	0.229531	0.454054	0.356903	17.6472	24.802	15.7317	0.137412	0.231358	1.1363	6.46845	13.4591	24.9641	[M]	Cell wall/membrane/envelope biogenesis	Molecular Function: catalytic activity (GO:0003824);; Biological Process: rRNA processing (GO:0006364);; Molecular Function: poly(U) RNA binding (GO:0008266);; Cellular Component: thylakoid (GO:0009579);; Cellular Component: chloroplast envelope (GO:0009941);; Cellular Component: plastoglobule (GO:0010287);; Cellular Component: apoplast (GO:0048046);; Molecular Function: coenzyme binding (GO:0050…	--	--	--	Chloroplast stem-loop binding protein of 41 kDa a, chloroplastic OS=Arabidopsis thaliana OX=3702 GN=CSP41A PE=1 SV=1	S	Function unknown	PREDICTED: chloroplast stem-loop binding protein of 41 kDa a, chloroplastic [Malus domestica]
MD04G1150900	0.320945	0.332856	0.229727	1.69341	2.92561	2.72845	0.391926	0.338874	0.426319	1.78777	2.97532	5.0892	--	--	--	--	--	--	--	S	Function unknown	PREDICTED: endochitinase A-like [Malus domestica]
MD15G1419800	0	0.161976	0.498517	0	0	0	0	0.75162	0.309683	0.332024	0	0.232705	--	--	Cellular Component: plasma membrane (GO:0005886);;	--	--	--	--	S	Function unknown	PREDICTED: uncharacterized protein LOC103402303 [Malus domestica]
MD01G1056400	0.581621	0	1.27057	1.38871	0	0	1.0584	0	0	0.887799	0.976478	1.33362	--	--	--	--	--	--	--	S	Function unknown	hypothetical protein PRUPE_2G167200 [Prunus persica]
MD14G1002400	0.024477	0	0.222814	0.430216	2.19411	1.16594	0.200574	0.157395	0.697301	0.246358	1.66518	1.71035	--	--	Biological Process: carbohydrate metabolic process (GO:0005975);; Biological Process: cellular metabolic process (GO:0044237);; Cellular Component: intracellular part (GO:0044424);; Biological Process: single-organism metabolic process (GO:0044710);;	--	--	--	Protein NDH-DEPENDENT CYCLIC ELECTRON FLOW 5 OS=Arabidopsis thaliana OX=3702 GN=NDF5 PE=2 SV=1	S	Function unknown	PREDICTED: protein NDH-DEPENDENT CYCLIC ELECTRON FLOW 5 [Malus domestica]
MD01G1094500	0.604272	0.0665	0.314899	0.374196	0.323838	1.45011	0.349932	0.487264	0.201686	0.18612	0.403693	0.188785	--	--	--	--	--	--	NAC domain-containing protein 14 OS=Arabidopsis thaliana OX=3702 GN=NAC014 PE=2 SV=1	--	--	PREDICTED: NAC domain-containing protein 14-like [Malus domestica]
MD07G1003800	0.240213	1.13176	0.056287	4.44531	2.91828	0.418844	0.798675	0.067742	0.137342	1.13746	4.43585	2.57793	--	--	--	--	--	--	O-fucosyltransferase 20 OS=Arabidopsis thaliana OX=3702 GN=OFUT20 PE=1 SV=1	S	Function unknown	PREDICTED: uncharacterized protein At1g04910-like [Malus domestica]
MD17G1275100	0.914186	0.400005	0.66112	0.406823	0.647582	0.594352	0.226758	0.364161	0.40263	0.20859	0.330485	0.614154	--	--	--	K14498|2.25122e-07|mdm:103422052|K14498 serine/threonine-protein kinase SRK2 [EC:2.7.11.1] | (RefSeq) serine/threonine-protein kinase SAPK2-like	[T]	Signal transduction mechanisms	Serine/threonine-protein kinase SAPK1 OS=Oryza sativa subsp. japonica OX=39947 GN=SAPK1 PE=1 SV=1	T	Signal transduction mechanisms	hypothetical protein EUTSA_v10018818mg [Eutrema salsugineum]
MD15G1083400	0.193594	0	0.270037	24.651	36.653	29.3022	0.113237	0.190181	0.479549	8.44586	15.1055	38.3365	--	--	Biological Process: rRNA processing (GO:0006364);; Cellular Component: chloroplast thylakoid membrane (GO:0009535);; Biological Process: photosynthesis, light harvesting in photosystem I (GO:0009768);; Cellular Component: photosystem I antenna complex (GO:0009782);; Biological Process: thylakoid membrane organization (GO:0010027);; Biological Process: photosystem II assembly (GO:0010207);; Cellul…	K08911|8.18136e-162|mdm:103455968|K08911 light-harvesting complex I chlorophyll a/b binding protein 5 | (RefSeq) photosystem I chlorophyll a/b-binding protein 5, chloroplastic	--	--	Photosystem I chlorophyll a/b-binding protein 5, chloroplastic OS=Arabidopsis thaliana OX=3702 GN=LHCA5 PE=1 SV=1	S	Function unknown	PREDICTED: photosystem I chlorophyll a/b-binding protein 5, chloroplastic [Malus domestica]
MD10G1300700	0	0.241879	0.484687	5.57107	7.74993	5.38377	0	0.424662	0.35489	7.59206	7.61734	5.22965	--	--	--	K08341|4.83176e-159|mdm:103446456|K08341 GABA(A) receptor-associated protein | (RefSeq) uncharacterized LOC103446456	[Z]	Cytoskeleton	Autophagy-related protein 8C OS=Oryza sativa subsp. japonica OX=39947 GN=ATG8C PE=2 SV=1	U	Intracellular trafficking, secretion, and vesicular transport	PREDICTED: uncharacterized protein LOC103446456 [Malus domestica]
MD16G1230800	0	0	0.217949	3.41975	5.08391	4.52072	0	0.257162	0.475839	2.31213	2.48862	4.84495	--	--	--	--	--	--	--	S	Function unknown	PREDICTED: uncharacterized protein LOC103405349 [Malus domestica]
MD10G1141400	0.066572	0.105942	0	0.759657	0.834226	0.12722	0.249924	0.221325	0.027976	0.00197	0.579107	0.379249	[K]	Transcription	--	--	--	--	Disease resistance-like protein DSC1 OS=Arabidopsis thaliana OX=3702 GN=DSC1 PE=1 SV=1	S	Function unknown	PREDICTED: TMV resistance protein N-like isoform X2 [Malus domestica]
MD06G1012400	0.208208	0.331869	0	0.502847	1.85658	0.41442	0.131148	0	0.247428	0.359916	0.145767	1.60471	--	--	Cellular Component: plastid (GO:0009536);; Cellular Component: intracellular ribonucleoprotein complex (GO:0030529);;	K02878|4.89834e-10|vvi:7498627|K02878 large subunit ribosomal protein L16 | (RefSeq) rpl16, ViviM_p062; ribosomal protein L16	[J]	Translation, ribosomal structure and biogenesis	60S ribosomal protein L16, mitochondrial OS=Arabidopsis thaliana OX=3702 GN=RPL16 PE=2 SV=3	J	Translation, ribosomal structure and biogenesis	hypothetical protein AEK19_MT0891 (mitochondrion) [Utricularia reniformis]
MD06G1031800	0	0	0	4.73639	9.15103	4.35412	0	0	0.376514	1.02712	4.44095	11.2965	--	--	Biological Process: malate transport (GO:0015743);;	--	--	--	--	S	Function unknown	PREDICTED: uncharacterized protein LOC103436880 [Malus domestica]
MD13G1235500	0.087658	0.139582	0	0	0.459264	0	0.023859	0.12303	0.16076	0	0.033018	0	--	--	Molecular Function: phospholipase A2 activity (GO:0004623);; Cellular Component: vacuole (GO:0005773);; Cellular Component: Golgi apparatus (GO:0005794);; Biological Process: phospholipid metabolic process (GO:0006644);; Biological Process: lipid catabolic process (GO:0016042);;	K01047|2.38791e-111|pxb:103939520|K01047 secretory phospholipase A2 [EC:3.1.1.4] | (RefSeq) phospholipase A2-alpha-like	--	--	Phospholipase A2-alpha OS=Arabidopsis thaliana OX=3702 GN=PLA2-ALPHA PE=1 SV=1	I	Lipid transport and metabolism	PREDICTED: phospholipase A2-alpha-like isoform X2 [Pyrus x bretschneideri]
MD06G1192900	0	0	0	4.74304	14.8901	6.28454	0.027647	0.028513	0.18851	0.424639	4.92348	11.0664	--	--	Molecular Function: DNA binding (GO:0003677);; Molecular Function: chromatin binding (GO:0003682);;	K09422|0|mdm:103437817|K09422 myb proto-oncogene protein, plant | (RefSeq) MYB31; myb-related protein 306-like	[K]	Transcription	Myb-related protein 306 OS=Antirrhinum majus OX=4151 GN=MYB306 PE=2 SV=1	K	Transcription	myb-related protein 306-like [Malus domestica]
MD10G1148300	0.021848	0	0.009842	8.41322	11.9687	6.01	0.009076	0.021157	0.108487	2.53446	5.00028	11.0996	[I]	Lipid transport and metabolism	--	--	[R]	General function prediction only	--	S	Function unknown	PREDICTED: uncharacterized hydrolase YNR064C [Malus domestica]
MD12G1142500	0	0	0.032322	1.40496	2.25636	1.5089	0	0	0.135801	0.452712	0.991692	1.76451	--	--	Molecular Function: DNA binding (GO:0003677);; Molecular Function: chromatin binding (GO:0003682);;	K09422|0|mdm:103450230|K09422 myb proto-oncogene protein, plant | (RefSeq) transcription factor AS1-like	[K]	Transcription	Transcription factor AS1 OS=Arabidopsis thaliana OX=3702 GN=AS1 PE=1 SV=1	K	Transcription	PREDICTED: transcription factor AS1-like [Malus domestica]
MD07G1163500	0.127904	0.020484	0.062126	0.186723	1.01328	0.529031	0.034987	0.059176	0.017579	0.183891	0.511048	1.18959	--	--	--	--	[K]	Transcription	Uncharacterized calcium-binding protein At1g02270 OS=Arabidopsis thaliana OX=3702 GN=At1g02270 PE=2 SV=2	A	RNA processing and modification	PREDICTED: uncharacterized calcium-binding protein At1g02270-like [Malus domestica]
MD02G1120900	0	0	0	0	0	0	0	0	0	0	0	0	--	--	--	--	--	--	--	--	--	PREDICTED: protein trichome birefringence-like [Pyrus x bretschneideri]
MD05G1251200	0	0	0	1.54055	3.46553	1.62761	0	0	0	0.081397	0.660237	1.97101	--	--	--	--	[R]	General function prediction only	Pentatricopeptide repeat-containing protein At2g35130 OS=Arabidopsis thaliana OX=3702 GN=At2g35130 PE=3 SV=1	S	Function unknown	PREDICTED: pentatricopeptide repeat-containing protein At2g35130 isoform X2 [Malus domestica]
Md/Mx leaf-to-root	Md/Mx +24 h r1	Md/Mx +24 h r2	Md/Mx +24 h r3	Md/Mx +24 h L1	Md/Mx +24 h L2	Md/Mx +24 h L3	Md/Mx -24 h r1	Md/Mx -24 h r2	Md/Mx -24 h r3	Md/Mx -24 h L1	Md/Mx -24 h L2	Md/Mx -24 h L3	COG_class	COG_class_annotation	GO_annotation	KEGG_annotation	KOG_class	KOG_class_annotation	Swissprot_annotation	eggNOG_class	eggNOG_class_annotation	nr_annotation
MD15G1372600	55.9186	128.435	451.082	275.01	268.903	350.318	48.3802	82.1911	117.022	281.367	510.128	327.088	[E]	Amino acid transport and metabolism	Molecular Function: 3-deoxy-7-phosphoheptulonate synthase activity (GO:0003849);; Biological Process: aromatic amino acid family biosynthetic process (GO:0009073);; Cellular Component: plastid (GO:0009536);; Biological Process: response to wounding (GO:0009611);; Biological Process: systemic acquired resistance (GO:0009627);; Biological Process: coumarin biosynthetic process (GO:0009805);; Cellul…	K01626|0|mdm:103436360|K01626 3-deoxy-7-phosphoheptulonate synthase [EC:2.5.1.54] | (RefSeq) phospho-2-dehydro-3-deoxyheptonate aldolase 1, chloroplastic-like	--	--	Phospho-2-dehydro-3-deoxyheptonate aldolase 1, chloroplastic OS=Nicotiana tabacum OX=4097 GN=DHAPS-1 PE=2 SV=1	E	Amino acid transport and metabolism	PREDICTED: phospho-2-dehydro-3-deoxyheptonate aldolase 1, chloroplastic-like [Malus domestica]
MD07G1007300	0.21589	0.175616	0.131929	91.8252	45.3906	0.195377	0.189728	0.15755	0.197811	0.275177	116.175	0.279505	--	--	Molecular Function: metal ion binding (GO:0046872);;	--	[R]	General function prediction only	Zinc finger A20 and AN1 domain-containing stress-associated protein 5 OS=Arabidopsis thaliana OX=3702 GN=SAP5 PE=2 SV=1	S	Function unknown	PREDICTED: zinc finger A20 and AN1 domain-containing stress-associated protein 5-like [Malus domestica]
MD11G1139800	23.0542	19.9084	27.1171	82.2698	36.5446	88.616	30.65	27.535	67.5073	169.64	143.825	195.438	[R]	General function prediction only	Molecular Function: zinc ion binding (GO:0008270);;	--	--	--	E3 ubiquitin-protein ligase WAV3 OS=Arabidopsis thaliana OX=3702 GN=WAV3 PE=1 SV=1	S	Function unknown	PREDICTED: uncharacterized protein LOC103447901 isoform X2 [Malus domestica]
MD07G1177000	43.0738	40.9004	64.1929	68.9952	44.1051	68.4047	44.8175	27.9832	46.393	100.573	107.809	94.0562	--	--	--	--	--	--	--	S	Function unknown	PREDICTED: uncharacterized protein LOC103444809 isoform X1 [Malus domestica]
MD11G1144800	171.467	136.785	72.5248	47.7222	27.1558	38.5756	171.388	174.207	153.772	42.86	36.6429	38.6723	[O]	Posttranslational modification, protein turnover, chaperones	Molecular Function: acid-amino acid ligase activity (GO:0016881);;	K10575|7.4798e-98|pxb:103944946|K10575 ubiquitin-conjugating enzyme E2 G1 [EC:2.3.2.23] | (RefSeq) ubiquitin-conjugating enzyme E2 7	[O]	Posttranslational modification, protein turnover, chaperones	Ubiquitin-conjugating enzyme E2 7 OS=Arabidopsis thaliana OX=3702 GN=UBC7 PE=1 SV=1	O	Posttranslational modification, protein turnover, chaperones	PREDICTED: ubiquitin-conjugating enzyme E2 7 [Malus domestica]
MD17G1223100	7.76768	8.13644	49.2597	46.6595	28.3953	49.2063	8.36279	9.31106	50.1174	57.3518	90.7469	92.1829	--	--	--	--	--	--	Probable WRKY transcription factor 40 OS=Arabidopsis thaliana OX=3702 GN=WRKY40 PE=1 SV=1	K	Transcription	PREDICTED: probable WRKY transcription factor 40 [Malus domestica]
MD06G1034600	52.7365	64.4567	107.264	43.9112	26.9047	54.425	58.6657	59.3325	65.0325	56.3859	67.4566	66.7258	--	--	Molecular Function: GTPase activator activity (GO:0008060);; Molecular Function: zinc ion binding (GO:0008270);; Biological Process: regulation of GTPase activity (GO:0032312);;	K12493|0|mdm:103436900|K12493 ADP-ribosylation factor GTPase-activating protein 2/3 | (RefSeq) probable ADP-ribosylation factor GTPase-activating protein AGD9	[T]	Signal transduction mechanisms	Probable ADP-ribosylation factor GTPase-activating protein AGD9 OS=Arabidopsis thaliana OX=3702 GN=AGD9 PE=1 SV=1	U	Intracellular trafficking, secretion, and vesicular transport	PREDICTED: probable ADP-ribosylation factor GTPase-activating protein AGD9 [Malus domestica]
MD00G1167000	0.540068	0.973207	1.10182	39.1798	32.6127	42.2994	0.474409	1.97465	0.899707	42.4241	50.5151	34.7921	[QV]	--	--	--	[Q]	Secondary metabolites biosynthesis, transport and catabolism	Cytochrome P450 71A1 OS=Persea americana OX=3435 GN=CYP71A1 PE=1 SV=2	Q	Secondary metabolites biosynthesis, transport and catabolism	PREDICTED: cytochrome P450 71A1-like [Malus domestica]
MD01G1226300	72.7211	74.2295	49.4293	37.1068	23.7442	23.4383	54.3661	81.3494	45.6064	35.6434	20.5918	22.2685	[G]	Carbohydrate transport and metabolism	Biological Process: defense response to oomycetes (GO:0002229);; Cellular Component: peroxisome (GO:0005777);; Cellular Component: plasma membrane (GO:0005886);; Biological Process: pentose-phosphate shunt (GO:0006098);; Cellular Component: chloroplast stroma (GO:0009570);; Molecular Function: 6-phosphogluconolactonase activity (GO:0017057);; Biological Process: defense response to bacterium (GO:…	K01057|0|pxb:103943378|K01057 6-phosphogluconolactonase [EC:3.1.1.31] | (RefSeq) probable 6-phosphogluconolactonase 4, chloroplastic	[G]	Carbohydrate transport and metabolism	Probable 6-phosphogluconolactonase 4, chloroplastic OS=Oryza sativa subsp. indica OX=39946 GN=OsI_031067 PE=3 SV=2	G	Carbohydrate transport and metabolism	PREDICTED: probable 6-phosphogluconolactonase 4, chloroplastic [Pyrus x bretschneideri]
MD16G1078300	33.1295	32.0286	50.5971	36.2508	33.4638	35.0459	34.3265	35.1627	32.6004	47.1978	52.5623	48.365	--	--	Cellular Component: cell wall (GO:0005618);; Cellular Component: nucleolus (GO:0005730);; Cellular Component: mitochondrial outer membrane (GO:0005741);; Cellular Component: vacuole (GO:0005773);; Cellular Component: plasma membrane (GO:0005886);; Molecular Function: voltage-gated anion channel activity (GO:0008308);; Cellular Component: chloroplast envelope (GO:0009941);; Biological Process: def…	K15040|0|mdm:103402924|K15040 voltage-dependent anion channel protein 2 | (RefSeq) mitochondrial outer membrane protein porin of 36 kDa	[P]	Inorganic ion transport and metabolism	Mitochondrial outer membrane protein porin of 36 kDa OS=Solanum tuberosum OX=4113 PE=1 SV=2	U	Intracellular trafficking, secretion, and vesicular transport	PREDICTED: mitochondrial outer membrane protein porin of 36 kDa [Malus domestica]
MD15G1288600	53.736	23.8564	21.2805	35.9471	25.8194	21.8081	80.617	97.3442	66.4146	28.4671	32.9452	26.8266	--	--	Molecular Function: DNA binding (GO:0003677);; Molecular Function: chromatin binding (GO:0003682);;	K09422|0|mdm:103401412|K09422 myb proto-oncogene protein, plant | (RefSeq) MYB6; transcription factor MYB44-like	[K]	Transcription	Transcription factor MYB73 OS=Arabidopsis thaliana OX=3702 GN=MYB73 PE=1 SV=1	K	Transcription	transcription factor MYB44-like [Malus domestica]
MD08G1217000	65.5833	51.2133	53.2081	30.6434	17.4281	27.0928	70.6877	59.3636	65.5974	25.7929	24.1071	27.2225	--	--	--	--	--	--	--	--	--	PREDICTED: uncharacterized protein LOC103406108 [Malus domestica]
MD14G1077300	31.8953	37.9199	28.0717	25.6617	19.5979	23.639	30.5415	38.8297	23.7718	15.1219	17.0198	10.6187	[V]	Defense mechanisms	Molecular Function: carboxylic ester hydrolase activity (GO:0004091);; Cellular Component: cytoplasmic vesicle (GO:0016023);; Molecular Function: S-formylglutathione hydrolase activity (GO:0018738);; Biological Process: formaldehyde catabolic process (GO:0046294);; Cellular Component: apoplast (GO:0048046);;	K01070|0|mdm:103454483|K01070 S-formylglutathione hydrolase [EC:3.1.2.12] | (RefSeq) S-formylglutathione hydrolase	[R]	General function prediction only	S-formylglutathione hydrolase OS=Arabidopsis thaliana OX=3702 GN=SFGH PE=1 SV=2	S	Function unknown	PREDICTED: S-formylglutathione hydrolase isoform X1 [Malus domestica]
MD15G1236100	26.3066	25.6271	9.30999	25.0591	12.0792	14.8109	26.9938	26.0471	27.6335	20.2167	11.6103	10.1189	--	--	Cellular Component: cytoplasm (GO:0005737);;	--	[BK]	--	--	S	Function unknown	PREDICTED: ganglioside-induced differentiation-associated-protein 2-like [Malus domestica]
MD06G1086400	33.6227	29.072	20.6175	24.7972	27.1521	25.3405	32.1002	37.0545	28.1947	24.918	26.7431	22.513	[E]	Amino acid transport and metabolism	Cellular Component: mitochondrion (GO:0005739);; Cellular Component: vacuole (GO:0005773);; Cellular Component: cytosol (GO:0005829);; Cellular Component: plasma membrane (GO:0005886);; Biological Process: proteolysis (GO:0006508);; Molecular Function: metallopeptidase activity (GO:0008237);; Molecular Function: zinc ion binding (GO:0008270);; Cellular Component: chloroplast stroma (GO:0009570);;…	K01256|0|mdm:103454768|K01256 aminopeptidase N [EC:3.4.11.2] | (RefSeq) puromycin-sensitive aminopeptidase	[EO]	--	Puromycin-sensitive aminopeptidase OS=Arabidopsis thaliana OX=3702 GN=MPA1 PE=2 SV=1	E	Amino acid transport and metabolism	puromycin-sensitive aminopeptidase isoform X1 [Herrania umbratica]
MD15G1170900	1.94317	1.00042	0.275604	24.7953	16.5271	23.7131	3.29465	4.04318	3.79939	16.7792	16.0339	11.2701	--	--	Biological Process: pentose-phosphate shunt (GO:0006098);; Biological Process: rRNA processing (GO:0006364);; Biological Process: unsaturated fatty acid biosynthetic process (GO:0006636);; Biological Process: response to cold (GO:0009409);; Cellular Component: chloroplast thylakoid membrane (GO:0009535);; Cellular Component: chloroplast thylakoid lumen (GO:0009543);; Cellular Component: chloropla…	--	--	--	Thylakoid lumenal 16.5 kDa protein, chloroplastic OS=Arabidopsis thaliana OX=3702 GN=At4g02530 PE=1 SV=3	S	Function unknown	PREDICTED: thylakoid lumenal 16.5 kDa protein, chloroplastic-like [Malus domestica]
MD09G1004400	26.101	24.3452	56.6044	23.2682	11.9599	27.0368	33.7942	26.7464	39.3151	25.5543	43.9399	45.4442	--	--	--	K15102|0|mdm:103442088|K15102 solute carrier family 25 (mitochondrial phosphate transporter), member 3 | (RefSeq) mitochondrial phosphate carrier protein 3, mitochondrial-like	[C]	Energy production and conversion	Mitochondrial phosphate carrier protein 3, mitochondrial OS=Arabidopsis thaliana OX=3702 GN=MPT3 PE=1 SV=1	S	Function unknown	PREDICTED: mitochondrial phosphate carrier protein 3, mitochondrial-like [Malus domestica]
MD00G1051300	20.9106	24.147	24.8253	22.0528	14.1283	27.4849	25.3641	22.3769	26.9682	55.395	38.6831	52.7541	[P]	Inorganic ion transport and metabolism	Biological Process: sodium ion transport (GO:0006814);; Biological Process: regulation of pH (GO:0006885);; Molecular Function: sodium:proton antiporter activity (GO:0015385);; Cellular Component: integral component of membrane (GO:0016021);; Biological Process: transmembrane transport (GO:0055085);;	--	[P]	Inorganic ion transport and metabolism	Sodium/hydrogen exchanger 2 OS=Arabidopsis thaliana OX=3702 GN=NHX2 PE=2 SV=2	P	Inorganic ion transport and metabolism	PREDICTED: sodium/hydrogen exchanger 2-like [Malus domestica]
MD01G1177200	5.31359	5.25931	5.71209	22.0495	12.3962	12.854	8.39256	16.0252	26.3998	14.6119	16.0242	18.6713	--	--	Molecular Function: DNA binding (GO:0003677);; Molecular Function: transcription factor activity, sequence-specific DNA binding (GO:0003700);; Cellular Component: nucleus (GO:0005634);; Biological Process: regulation of transcription, DNA-templated (GO:0006355);;	--	--	--	Ethylene-responsive transcription factor ERF106 OS=Arabidopsis thaliana OX=3702 GN=ERF106 PE=2 SV=1	K	Transcription	AP2 domain class transcription factor [Malus domestica]
MD14G1132800	15.4119	16.2661	17.8328	19.4097	12.0839	17.1921	12.4971	15.2925	9.81851	25.2944	18.9463	22.7717	--	--	Cellular Component: proteasome regulatory particle (GO:0005838);; Biological Process: proteolysis (GO:0006508);;	K03031|6.2636e-174|mdm:103400669|K03031 26S proteasome regulatory subunit N12 | (RefSeq) 26S proteasome non-ATPase regulatory subunit 8 homolog A	[O]	Posttranslational modification, protein turnover, chaperones	26S proteasome non-ATPase regulatory subunit 8 homolog A OS=Arabidopsis thaliana OX=3702 GN=RPN12A PE=1 SV=1	O	Posttranslational modification, protein turnover, chaperones	PREDICTED: 26S proteasome non-ATPase regulatory subunit 8 homolog A [Malus domestica]
MD04G1138400	12.6967	20.4437	17.4075	19.1609	15.4773	15.7897	8.26473	24.6396	7.87208	2.25694	2.29955	1.63238	[S]	Function unknown	--	K20929|0|mdm:103423394|K20929 glyoxal/methylglyoxal oxidase [EC:1.2.3.15] | (RefSeq) aldehyde oxidase GLOX	--	--	Aldehyde oxidase GLOX OS=Vitis pseudoreticulata OX=231512 GN=GLOX PE=2 SV=1	S	Function unknown	PREDICTED: LOW QUALITY PROTEIN: aldehyde oxidase GLOX [Malus domestica]
MD15G1193400	30.373	19.407	22.4654	17.7192	13.7578	14.2972	38.7777	28.1715	40.4414	16.8602	17.1443	24.4546	[G]	Carbohydrate transport and metabolism	Biological Process: carbohydrate transport (GO:0008643);; Cellular Component: integral component of membrane (GO:0016021);; Molecular Function: substrate-specific transmembrane transporter activity (GO:0022891);; Molecular Function: 2-alkenal reductase [NAD(P)] activity (GO:0032440);; Biological Process: transmembrane transport (GO:0055085);; Biological Process: oxidation-reduction process (GO:00…	--	[R]	General function prediction only	Sugar transport protein 14 OS=Arabidopsis thaliana OX=3702 GN=STP14 PE=2 SV=2	G	Carbohydrate transport and metabolism	PREDICTED: sugar transport protein 14-like [Malus domestica]
MD07G1288800	17.2442	4.01171	11.3986	16.0391	8.98362	16.5121	17.3957	15.045	16.102	12.668	11.2352	17.3247	[T]	Signal transduction mechanisms	Molecular Function: calcium-dependent protein serine/threonine phosphatase activity (GO:0004723);; Molecular Function: calcium ion binding (GO:0005509);; Biological Process: detection of calcium ion (GO:0005513);; Cellular Component: cytoplasm (GO:0005737);; Cellular Component: calcineurin complex (GO:0005955);; Biological Process: stomatal movement (GO:0010118);; Biological Process: calcium-medi…	K06268|1.15345e-152|mdm:103439871|K06268 serine/threonine-protein phosphatase 2B regulatory subunit | (RefSeq) calcineurin B-like protein 4	[T]	Signal transduction mechanisms	Calcineurin B-like protein 4 OS=Arabidopsis thaliana OX=3702 GN=CBL4 PE=1 SV=3	DTZ	--	PREDICTED: calcineurin B-like protein 4 isoform X2 [Malus domestica]
MD12G1260900	15.226	15.445	16.8822	15.4882	13.4326	23.0383	9.61891	12.436	9.74761	12.681	14.0507	9.88948	[QR]	--	Molecular Function: nucleotide binding (GO:0000166);; Molecular Function: zinc ion binding (GO:0008270);; Molecular Function: 2-alkenal reductase [NAD(P)] activity (GO:0032440);; Biological Process: oxidation-reduction process (GO:0055114);;	--	[R]	General function prediction only	2-alkenal reductase (NADP(+)-dependent) OS=Nicotiana tabacum OX=4097 GN=DBR PE=1 SV=1	S	Function unknown	2-alkenal reductase (NADP(+)-dependent) [Prunus persica]
MD07G1229400	18.2914	13.4155	18.4984	14.724	8.01165	14.3725	14.0733	15.656	12.7301	21.7385	17.6866	18.0579	--	--	Biological Process: mRNA export from nucleus (GO:0006406);; Biological Process: protein import into nucleus (GO:0006606);;	K14840|0|mdm:103432886|K14840 nucleolar protein 53 | (RefSeq) uncharacterized protein At2g40430	[R]	General function prediction only	Ribosome biogenesis protein NOP53 OS=Arabidopsis thaliana OX=3702 GN=At2g40430 PE=1 SV=2	S	Function unknown	PREDICTED: uncharacterized protein At2g40430 [Malus domestica]
MD09G1052000	6.03895	6.19501	4.37536	12.981	9.90556	15.4814	5.81948	7.41487	4.30816	13.3711	12.4587	11.1862	[G]	Carbohydrate transport and metabolism	Biological Process: biosynthetic process (GO:0009058);; Molecular Function: transferase activity, transferring glycosyl groups (GO:0016757);;	K00703|0|mdm:103429037|K00703 starch synthase [EC:2.4.1.21] | (RefSeq) granule-bound starch synthase 2, chloroplastic/amyloplastic-like	--	--	Starch synthase 2, chloroplastic/amyloplastic OS=Arabidopsis thaliana OX=3702 GN=SS2 PE=1 SV=1	G	Carbohydrate transport and metabolism	PREDICTED: granule-bound starch synthase 2, chloroplastic/amyloplastic-like [Malus domestica]
MD03G1004400	20.5495	37.8794	47.7336	12.5601	11.2876	10.8319	24.4644	26.8612	17.1016	8.96412	8.50242	6.45625	--	--	Molecular Function: GTPase activity (GO:0003924);; Molecular Function: structural constituent of cytoskeleton (GO:0005200);; Molecular Function: GTP binding (GO:0005525);; Cellular Component: cell wall (GO:0005618);; Cellular Component: cytosol (GO:0005829);; Cellular Component: microtubule (GO:0005874);; Cellular Component: plasma membrane (GO:0005886);; Biological Process: obsolete GTP cataboli…	K07374|0|mdm:103414895|K07374 tubulin alpha | (RefSeq) tubulin alpha-3 chain	[Z]	Cytoskeleton	Tubulin alpha-3 chain OS=Eleusine indica OX=29674 GN=TUBA3 PE=2 SV=1	Z	Cytoskeleton	PREDICTED: tubulin alpha-3 chain [Malus domestica]
MD04G1121200	30.5998	32.8038	29.4721	12.4746	8.75304	15.1257	27.82	26.2987	30.0715	13.9607	15.7444	13.1398	--	--	--	--	--	--	--	S	Function unknown	PREDICTED: uncharacterized protein LOC103427563 [Malus domestica]
MD08G1136600	9.67339	10.6981	6.52124	11.96	8.68028	7.88737	11.1819	8.30649	11.2227	9.04564	6.1671	12.8677	--	--	--	--	--	--	Polyadenylate-binding protein-interacting protein 5 OS=Arabidopsis thaliana OX=3702 GN=CID5 PE=2 SV=1	S	Function unknown	PREDICTED: polyadenylate-binding protein-interacting protein 6-like [Malus domestica]
MD15G1188600	23.1038	19.7795	14.9734	11.6905	6.72339	8.59952	24.7815	25.6303	25.3438	11.541	12.1998	12.0892	--	--	--	--	[T]	Signal transduction mechanisms	Probable ADP-ribosylation factor GTPase-activating protein AGD14 OS=Arabidopsis thaliana OX=3702 GN=AGD14 PE=1 SV=2	U	Intracellular trafficking, secretion, and vesicular transport	PREDICTED: probable ADP-ribosylation factor GTPase-activating protein AGD14 [Pyrus x bretschneideri]
MD09G1227700	53.6459	14.5216	21.8732	11.6298	3.97128	11.6489	32.7077	23.4953	39.712	14.543	13.1729	22.4834	--	--	--	--	--	--	--	S	Function unknown	PREDICTED: uncharacterized protein LOC103443996 [Malus domestica]
MD17G1003300	23.1218	21.9863	28.8715	11.4694	5.1045	7.64745	31.8573	29.7441	34.0167	11.0057	13.9508	14.3539	[I]	Lipid transport and metabolism	--	K01895|0|mdm:103416930|K01895 acetyl-CoA synthetase [EC:6.2.1.1] | (RefSeq) acetyl-coenzyme A synthetase, chloroplastic/glyoxysomal-like	[I]	Lipid transport and metabolism	Acetyl-coenzyme A synthetase, chloroplastic/glyoxysomal OS=Arabidopsis thaliana OX=3702 GN=ACS PE=1 SV=1	I	Lipid transport and metabolism	PREDICTED: acetyl-coenzyme A synthetase, chloroplastic/glyoxysomal-like isoform X1 [Malus domestica]
MD09G1248700	15.9755	28.7841	14.0343	11.4562	5.22022	14.9475	14.7784	20.6241	12.1396	11.2737	9.29576	12.0918	--	--	--	K10666|1.04816e-165|mdm:103429372|K10666 E3 ubiquitin-protein ligase RNF5 [EC:2.3.2.27] | (RefSeq) E3 ubiquitin-protein ligase RMA1H1-like	[O]	Posttranslational modification, protein turnover, chaperones	E3 ubiquitin-protein ligase RMA1H1 OS=Capsicum annuum OX=4072 GN=RMA1H1 PE=1 SV=1	O	Posttranslational modification, protein turnover, chaperones	PREDICTED: E3 ubiquitin-protein ligase RMA1H1-like [Malus domestica]
MD13G1212500	5.86812	5.96727	5.6732	9.98021	9.35646	10.702	10.8498	6.66971	9.68769	7.2391	8.19638	7.52077	[C]	Energy production and conversion	Biological Process: leucine catabolic process (GO:0006552);; Molecular Function: electron carrier activity (GO:0009055);; Biological Process: chlorophyll catabolic process (GO:0015996);; Biological Process: methylglyoxal catabolic process to D-lactate via S-lactoyl-glutathione (GO:0019243);;	K03521|1.40175e-179|mdm:103453422|K03521 electron transfer flavoprotein beta subunit | (RefSeq) electron transfer flavoprotein subunit beta, mitochondrial	[C]	Energy production and conversion	Electron transfer flavoprotein subunit beta, mitochondrial OS=Arabidopsis thaliana OX=3702 GN=ETFB PE=1 SV=1	C	Energy production and conversion	PREDICTED: electron transfer flavoprotein subunit beta, mitochondrial [Malus domestica]
MD03G1018500	22.5367	39.4743	17.8531	9.507	10.3856	11.5075	32.9526	38.3736	24.9256	4.88623	8.45455	7.60209	[R]	General function prediction only	--	K07018|2.11705e-152|mdm:103415828|K07018 uncharacterized protein | (RefSeq) uncharacterized protein RP471	--	--	--	S	Function unknown	PREDICTED: uncharacterized protein RP471 [Malus domestica]
MD05G1249400	1.40561	2.16923	0.746807	9.48367	5.65086	5.82212	0.93261	1.32115	0.229245	3.57737	3.47592	3.26031	[J]	Translation, ribosomal structure and biogenesis	Cellular Component: mitochondrion (GO:0005739);;	--	--	--	--	S	Function unknown	PREDICTED: LOW QUALITY PROTEIN: uncharacterized protein LOC103435300 [Malus domestica]
MD11G1285100	0.033118	0.169163	0.055935	9.12613	12.2246	13.1676	0.067048	0.230209	0.087172	5.36641	4.14444	1.90166	[M]	Cell wall/membrane/envelope biogenesis	Molecular Function: catalytic activity (GO:0003824);; Biological Process: rRNA processing (GO:0006364);; Molecular Function: poly(U) RNA binding (GO:0008266);; Cellular Component: thylakoid (GO:0009579);; Cellular Component: chloroplast envelope (GO:0009941);; Cellular Component: plastoglobule (GO:0010287);; Cellular Component: apoplast (GO:0048046);; Molecular Function: coenzyme binding (GO:0050…	--	--	--	Chloroplast stem-loop binding protein of 41 kDa a, chloroplastic OS=Arabidopsis thaliana OX=3702 GN=CSP41A PE=1 SV=1	S	Function unknown	PREDICTED: chloroplast stem-loop binding protein of 41 kDa a, chloroplastic [Malus domestica]
MD09G1292500	26.6328	24.9242	14.9544	8.86649	6.41066	10.5979	27.2544	29.7178	27.1064	10.4926	11.3697	11.3152	[T]	Signal transduction mechanisms	Molecular Function: protein serine/threonine kinase activity (GO:0004674);; Molecular Function: ATP binding (GO:0005524);; Biological Process: protein phosphorylation (GO:0006468);;	K13436|0|pxb:103953081|K13436 pto-interacting protein 1 [EC:2.7.11.1] | (RefSeq) pto-interacting protein 1-like	[T]	Signal transduction mechanisms	Probable receptor-like protein kinase At2g47060 OS=Arabidopsis thaliana OX=3702 GN=At2g47060 PE=1 SV=1	T	Signal transduction mechanisms	PREDICTED: pto-interacting protein 1-like [Pyrus x bretschneideri]
MD13G1175700	15.4355	11.8334	6.3137	8.86359	5.17641	7.12519	15.9515	14.4363	9.08039	6.55709	8.23083	4.8255	[J]	Translation, ribosomal structure and biogenesis	--	K12900|3.68301e-57|mdm:103453006|K12900 FUS-interacting serine-arginine-rich protein 1 | (RefSeq) serine/arginine-rich SC35-like splicing factor SCL28	[R]	General function prediction only	Serine/arginine-rich SC35-like splicing factor SCL28 OS=Arabidopsis thaliana OX=3702 GN=SCL28 PE=1 SV=1	S	Function unknown	PREDICTED: serine/arginine-rich SC35-like splicing factor SCL28 isoform X1 [Malus domestica]
MD12G1165800	3.0982	3.05641	0.154494	3.81098	4.36308	3.61753	5.57043	5.14542	6.7701	0.312773	0.584196	0.020708	[P]	Inorganic ion transport and metabolism	Biological Process: calcium ion transport (GO:0006816);; Molecular Function: calcium:proton antiporter activity (GO:0015369);; Cellular Component: integral component of membrane (GO:0016021);; Biological Process: transmembrane transport (GO:0055085);;	K07300|0|mdm:103450620|K07300 Ca2+:H+ antiporter | (RefSeq) vacuolar cation/proton exchanger 3-like	[P]	Inorganic ion transport and metabolism	Vacuolar cation/proton exchanger 3 OS=Arabidopsis thaliana OX=3702 GN=CAX3 PE=1 SV=1	P	Inorganic ion transport and metabolism	PREDICTED: vacuolar cation/proton exchanger 3-like [Malus domestica]
MD02G1173500	0.04692	0.785402	0.800405	7.97664	2.32735	0.259307	1.03019	0.72927	0.248304	0	0	0.49832	--	--	--	--	--	--	Protein RALF-like 34 OS=Arabidopsis thaliana OX=3702 GN=RALFL34 PE=2 SV=1	S	Function unknown	PREDICTED: protein RALF-like 34 [Pyrus x bretschneideri]
MD05G1115200	8.11661	5.24613	7.14113	7.30874	5.06955	5.65109	6.97583	6.95556	6.46276	10.0777	6.90941	8.35382	[G]	Carbohydrate transport and metabolism	--	--	--	--	Probable alkaline/neutral invertase B OS=Arabidopsis thaliana OX=3702 GN=INVB PE=1 SV=1	S	Function unknown	PREDICTED: probable alkaline/neutral invertase B [Malus domestica]
MD16G1047300	37.196	29.1064	7.68416	6.89346	4.53619	6.08566	33.0657	27.7162	32.3098	4.49959	3.87732	7.05896	--	--	Molecular Function: binding (GO:0005488);;	--	--	--	Transcription factor HHO3 OS=Arabidopsis thaliana OX=3702 GN=HHO3 PE=2 SV=1	K	Transcription	PREDICTED: uncharacterized protein LOC103402722 [Malus domestica]
MD11G1272700	14.6081	16.0873	13.219	6.77704	5.42594	6.9475	19.9606	18.7159	19.3272	7.57909	6.95509	9.22043	[M]	Cell wall/membrane/envelope biogenesis	Biological Process: MAPK cascade (GO:0000165);; Molecular Function: MAP kinase activity (GO:0004707);; Molecular Function: ATP binding (GO:0005524);; Cellular Component: cytoplasm (GO:0005737);; Biological Process: protein phosphorylation (GO:0006468);; Biological Process: cortical microtubule organization (GO:0043622);;	--	[T]	Signal transduction mechanisms	Mitogen-activated protein kinase 19 OS=Arabidopsis thaliana OX=3702 GN=MPK19 PE=2 SV=2	T	Signal transduction mechanisms	PREDICTED: mitogen-activated protein kinase 19-like isoform X1 [Pyrus x bretschneideri]
MD02G1003500	11.8053	45.2802	4.21353	6.53087	3.1523	11.0536	4.37852	4.61263	7.52055	8.37255	4.42181	7.10604	--	--	Molecular Function: transcription cofactor activity (GO:0003712);; Molecular Function: histone acetyltransferase activity (GO:0004402);; Molecular Function: calmodulin binding (GO:0005516);; Cellular Component: nucleus (GO:0005634);; Biological Process: regulation of transcription, DNA-templated (GO:0006355);; Molecular Function: zinc ion binding (GO:0008270);; Biological Process: embryo sac deve…	--	[K]	Transcription	BTB/POZ and TAZ domain-containing protein 3 OS=Arabidopsis thaliana OX=3702 GN=BT3 PE=1 SV=2	S	Function unknown	PREDICTED: BTB/POZ and TAZ domain-containing protein 3-like [Malus domestica]
MD12G1240800	9.05496	11.1784	18.9635	6.37185	4.62215	7.67126	13.6781	11.1155	15.5071	7.85815	8.82829	7.2759	--	--	--	--	--	--	--	S	Function unknown	PREDICTED: uncharacterized protein LOC103954415 [Pyrus x bretschneideri]
MD05G1169300	12.9382	17.1492	50.4055	6.34839	4.63049	7.40179	10.8857	10.7863	24.8231	5.0159	4.48397	4.51905	[H]	Coenzyme transport and metabolism	--	K01495|0|mdm:103435873|K01495 GTP cyclohydrolase I [EC:3.5.4.16] | (RefSeq) GTP cyclohydrolase 1	[H]	Coenzyme transport and metabolism	GTP cyclohydrolase 1 OS=Solanum lycopersicum OX=4081 GN=GCH1 PE=1 SV=1	H	Coenzyme transport and metabolism	PREDICTED: GTP cyclohydrolase 1 [Malus domestica]
MD01G1235500	13.9548	13.4819	13.0389	6.25165	4.50493	7.29172	14.0439	14.7987	14.4815	14.042	11.1432	11.2487	[G]	Carbohydrate transport and metabolism	Cellular Component: integral component of membrane (GO:0016021);; Molecular Function: substrate-specific transmembrane transporter activity (GO:0022891);; Biological Process: transmembrane transport (GO:0055085);;	--	[R]	General function prediction only	D-xylose-proton symporter-like 2 OS=Arabidopsis thaliana OX=3702 GN=At5g17010 PE=1 SV=1	G	Carbohydrate transport and metabolism	PREDICTED: D-xylose-proton symporter-like 2 [Malus domestica]
MD15G1361000	7.20146	6.28316	6.10569	5.53197	7.71242	5.37352	6.5754	8.4808	4.89392	4.84064	6.49956	2.37268	--	--	--	--	--	--	--	--	--	PREDICTED: sodium/potassium/calcium exchanger 1-like [Malus domestica]
MD10G1179600	12.6962	12.2777	16.4859	5.4541	3.5319	7.24311	13.1738	10.4734	11.9893	5.55459	6.74029	5.87056	[C]	Energy production and conversion	Molecular Function: succinate-CoA ligase (GDP-forming) activity (GO:0004776);; Molecular Function: copper ion binding (GO:0005507);; Molecular Function: ATP binding (GO:0005524);; Biological Process: gluconeogenesis (GO:0006094);; Biological Process: glycolytic process (GO:0006096);; Biological Process: ubiquitin-dependent protein catabolic process (GO:0006511);; Biological Process: response to s…	K01900|0|mdm:103445597|K01900 succinyl-CoA synthetase beta subunit [EC:6.2.1.4 6.2.1.5] | (RefSeq) succinyl-CoA ligase [ADP-forming] subunit beta, mitochondrial	[C]	Energy production and conversion	Succinate--CoA ligase [ADP-forming] subunit beta, mitochondrial OS=Arabidopsis thaliana OX=3702 GN=At2g20420 PE=1 SV=1	C	Energy production and conversion	PREDICTED: succinyl-CoA ligase [ADP-forming] subunit beta, mitochondrial [Malus domestica]
MD09G1287000	2.81718	1.58433	3.23316	5.25928	4.22024	4.72789	2.58296	2.59945	2.80351	4.64091	3.0058	3.22746	[S]	Function unknown	--	--	--	--	--	S	Function unknown	PREDICTED: uncharacterized protein LOC103953104 [Pyrus x bretschneideri]
MD08G1227000	1.84263	2.39041	1.01659	4.98232	1.86994	4.15426	1.64815	2.00088	4.03637	3.1244	3.5755	3.17934	[R]	General function prediction only	--	K13414|0|mdm:103416359|K13414 mitogen-activated protein kinase kinase kinase 1 [EC:2.7.11.25] | (RefSeq) mitogen-activated protein kinase kinase kinase 1-like	[T]	Signal transduction mechanisms	Mitogen-activated protein kinase kinase kinase 1 OS=Arabidopsis thaliana OX=3702 GN=MEKK1 PE=1 SV=2	T	Signal transduction mechanisms	PREDICTED: LOW QUALITY PROTEIN: mitogen-activated protein kinase kinase kinase 1-like [Malus domestica]
MD03G1229900	8.85873	8.16964	7.76732	4.86979	2.7145	3.74578	12.1966	10.8996	8.75973	3.66197	3.99489	2.03363	--	--	--	--	--	--	Uncharacterized GPI-anchored protein At1g61900 OS=Arabidopsis thaliana OX=3702 GN=At1g61900 PE=1 SV=1	S	Function unknown	PREDICTED: uncharacterized GPI-anchored protein At1g61900-like [Pyrus x bretschneideri]
MD15G1232300	6.66097	8.71954	2.58754	4.69519	3.1452	3.34569	9.80265	8.59638	5.5693	7.65126	4.97394	9.07427	--	--	Molecular Function: nucleotide binding (GO:0000166);; Molecular Function: RNA binding (GO:0003723);; Cellular Component: intracellular ribonucleoprotein complex (GO:0030529);;	K12898|0|mdm:103431544|K12898 heterogeneous nuclear ribonucleoprotein F/H | (RefSeq) heterogeneous nuclear ribonucleoprotein F-like	[A]	RNA processing and modification	--	S	Function unknown	PREDICTED: heterogeneous nuclear ribonucleoprotein H2 isoform X1 [Malus domestica]
MD03G1090000	5.56479	5.15663	3.39439	4.55474	3.11794	3.50133	4.1111	6.00731	5.5758	4.66351	4.89327	4.05165	--	--	--	--	[I]	Lipid transport and metabolism	Oxysterol-binding protein-related protein 3C OS=Arabidopsis thaliana OX=3702 GN=ORP3C PE=2 SV=1	S	Function unknown	PREDICTED: oxysterol-binding protein-related protein 3C isoform X1 [Malus domestica]
MD04G1079400	4.16822	3.21999	2.10835	4.08168	2.98264	4.41094	3.7011	2.32711	2.90627	4.12277	4.64238	2.89871	[J]	Translation, ribosomal structure and biogenesis	Molecular Function: translation release factor activity (GO:0003747);; Biological Process: translational termination (GO:0006415);;	K15033|7.94955e-156|mdm:103408295|K15033 peptidyl-tRNA hydrolase ICT1 [EC:3.1.1.29] | (RefSeq) peptidyl-tRNA hydrolase ICT1, mitochondrial-like	[J]	Translation, ribosomal structure and biogenesis	--	J	Translation, ribosomal structure and biogenesis	PREDICTED: peptidyl-tRNA hydrolase ICT1, mitochondrial-like isoform X1 [Malus domestica]
MD04G1079600	4.55573	7.23994	5.42253	3.88356	3.05167	3.10548	6.93687	7.75416	7.34193	2.94363	4.46366	2.09182	[K]	Transcription	Molecular Function: protein kinase activity (GO:0004672);; Molecular Function: ATP binding (GO:0005524);; Biological Process: protein phosphorylation (GO:0006468);; Cellular Component: integral component of membrane (GO:0016021);; Molecular Function: 2-alkenal reductase [NAD(P)] activity (GO:0032440);; Biological Process: oxidation-reduction process (GO:0055114);;	--	--	--	Probable LRR receptor-like serine/threonine-protein kinase IRK OS=Arabidopsis thaliana OX=3702 GN=IRK PE=1 SV=1	T	Signal transduction mechanisms	PREDICTED: probable leucine-rich repeat receptor-like protein kinase At5g63930 [Malus domestica]
MD15G1324500	1.31503	2.58344	2.5487	3.83012	2.55903	3.22744	1.69421	2.57479	1.75541	5.14843	2.75148	1.95889	--	--	--	--	--	--	DNA oxidative demethylase ALKBH2 OS=Arabidopsis thaliana OX=3702 GN=ALKBH2 PE=2 SV=2	S	Function unknown	PREDICTED: uncharacterized protein LOC103930467 [Pyrus x bretschneideri]
MD14G1185100	1.12234	1.51335	2.22558	3.77423	3.66322	3.18246	1.62989	3.60747	2.36176	1.48182	1.79364	1.03768	--	--	--	--	--	--	--	S	Function unknown	PREDICTED: LOW QUALITY PROTEIN: uncharacterized protein LOC103455248 [Malus domestica]
MD16G1177600	11.9253	11.4299	7.96587	3.76107	2.86502	4.54696	9.41215	8.81147	12.0896	8.6021	8.18602	7.76516	--	--	Biological Process: cell morphogenesis (GO:0000902);; Biological Process: epidermal cell differentiation (GO:0009913);; Biological Process: positive regulation of organelle organization (GO:0010638);; Biological Process: cellular macromolecule biosynthetic process (GO:0034645);; Biological Process: cell wall biogenesis (GO:0042546);; Biological Process: xylan metabolic process (GO:0045491);; Biol…	--	--	--	Squamosa promoter-binding-like protein 7 OS=Arabidopsis thaliana OX=3702 GN=SPL7 PE=1 SV=2	S	Function unknown	PREDICTED: squamosa promoter-binding-like protein 7 [Malus domestica]
MD05G1251000	10.883	9.41636	38.4207	3.54305	2.78988	3.56654	13.8765	4.22107	13.4702	3.32769	2.26426	3.0464	[E]	Amino acid transport and metabolism	Molecular Function: ATP binding (GO:0005524);; Cellular Component: glycine cleavage complex (GO:0005960);; Biological Process: glycine decarboxylation via glycine cleavage system (GO:0019464);;	K02437|9.01591e-102|pxb:103945156|K02437 glycine cleavage system H protein | (RefSeq) glycine cleavage system H protein 2, mitochondrial	[E]	Amino acid transport and metabolism	Glycine cleavage system H protein 2, mitochondrial OS=Arabidopsis thaliana OX=3702 GN=GDH2 PE=2 SV=1	E	Amino acid transport and metabolism	PREDICTED: glycine cleavage system H protein 2, mitochondrial [Pyrus x bretschneideri]
MD11G1180800	4.95711	9.39049	10.9703	3.41907	4.12141	4.63385	5.84556	8.0877	6.83707	4.70634	5.43761	5.05679	[P]	Inorganic ion transport and metabolism	--	--	--	--	--	S	Function unknown	PREDICTED: uncharacterized protein LOC101297333 [Fragaria vesca subsp. vesca]
MD17G1097500	3.06813	3.0457	4.08112	3.26153	2.24779	3.70655	3.96687	3.38865	3.10069	3.88496	3.38139	3.06423	--	--	--	K20855|0|mdm:103404820|K20855 beta-1,3-galactosyltransferase 1/2/3/4/5/7/8 [EC:2.4.1.-] | (RefSeq) probable beta-1,3-galactosyltransferase 2	[G]	Carbohydrate transport and metabolism	Probable beta-1,3-galactosyltransferase 2 OS=Arabidopsis thaliana OX=3702 GN=B3GALT2 PE=2 SV=1	S	Function unknown	PREDICTED: probable beta-1,3-galactosyltransferase 2 isoform X1 [Malus domestica]
MD14G1082900	2.3162	2.02143	3.29125	3.08999	3.75148	2.89064	3.50192	2.73239	3.39509	5.39102	6.15907	6.43832	--	--	--	--	--	--	Calmodulin binding protein PICBP OS=Arabidopsis thaliana OX=3702 GN=PICBP PE=2 SV=1	S	Function unknown	PREDICTED: uncharacterized protein LOC103415050 [Malus domestica]
MD07G1189500	11.6882	36.9704	31.6597	2.9402	3.73926	3.16473	7.13382	10.0461	5.91195	0.766494	1.14971	0.177665	[R]	General function prediction only	Molecular Function: glutathione dehydrogenase (ascorbate) activity (GO:0045174);; Biological Process: oxidation-reduction process (GO:0055114);;	--	[P]	Inorganic ion transport and metabolism	Glutathione S-transferase DHAR2 OS=Arabidopsis thaliana OX=3702 GN=DHAR2 PE=1 SV=1	O	Posttranslational modification, protein turnover, chaperones	PREDICTED: glutathione S-transferase DHAR2-like [Pyrus x bretschneideri]
MD07G1054600	2.84847	1.95927	3.29858	2.86202	2.13628	4.15303	2.17687	3.01706	2.47829	3.70937	4.73617	6.19451	--	--	--	K12190|0|mdm:103418492|K12190 ESCRT-II complex subunit VPS36 | (RefSeq) vacuolar protein sorting-associated protein 36-like	[U]	Intracellular trafficking, secretion, and vesicular transport	Vacuolar protein sorting-associated protein 36 OS=Arabidopsis thaliana OX=3702 GN=VPS36 PE=1 SV=1	U	Intracellular trafficking, secretion, and vesicular transport	PREDICTED: vacuolar protein sorting-associated protein 36-like [Malus domestica]
MD11G1251400	0.240213	0	0.064843	2.58514	1.0372	1.14943	0.07123	0.158811	0.909871	2.59506	1.44702	3.16209	[V]	Defense mechanisms	--	K03327|0|mdm:103448706|K03327 multidrug resistance protein, MATE family | (RefSeq) protein DETOXIFICATION 19-like	[R]	General function prediction only	Protein DETOXIFICATION 19 OS=Arabidopsis thaliana OX=3702 GN=DTX19 PE=2 SV=1	V	Defense mechanisms	PREDICTED: LOW QUALITY PROTEIN: protein DETOXIFICATION 19-like [Malus domestica]
MD14G1064600	2.05165	6.07227	6.10689	2.31962	2.99163	3.06664	3.31196	9.27567	3.34036	1.28298	1.06841	0.721722	--	--	--	--	--	--	--	S	Function unknown	PREDICTED: uncharacterized protein LOC103936952 [Pyrus x bretschneideri]
MD02G1081200	8.1502	8.47792	13.6782	1.93075	1.00904	1.34983	10.715	13.0046	11.8527	0.664508	1.40505	0.842791	--	--	--	--	--	--	UPF0481 protein At3g47200 OS=Arabidopsis thaliana OX=3702 GN=At3g47200 PE=2 SV=1	--	--	PREDICTED: UPF0481 protein At3g47200-like [Malus domestica]
MD03G1294400	0.143181	0.606648	0.822097	1.828	1.31637	1.61176	0.367135	0.458867	0.094401	0.341106	0.690095	0.036115	--	--	--	--	--	--	Protein trichome birefringence-like 6 OS=Arabidopsis thaliana OX=3702 GN=TBL6 PE=2 SV=1	S	Function unknown	PREDICTED: protein trichome birefringence-like 6 [Malus domestica]
MD04G1083700	4.7222	4.15175	3.76757	1.73243	1.83516	1.61004	4.30087	3.86558	3.87718	1.7623	2.85887	2.21516	[J]	Translation, ribosomal structure and biogenesis	Molecular Function: RNA binding (GO:0003723);;	K07575|4.19014e-105|pxb:103930601|K07575 PUA domain protein | (RefSeq) malignant T-cell-amplified sequence 1 homolog	[J]	Translation, ribosomal structure and biogenesis	--	J	Translation, ribosomal structure and biogenesis	PREDICTED: malignant T-cell-amplified sequence 1 homolog [Pyrus x bretschneideri]
MD03G1048800	40.198	38.4243	30.869	1.72327	2.24494	3.50094	32.8359	20.1516	29.822	3.92511	3.43263	2.66941	[K]	Transcription	--	--	--	--	Probable LRR receptor-like serine/threonine-protein kinase At1g06840 OS=Arabidopsis thaliana OX=3702 GN=At1g06840 PE=2 SV=2	T	Signal transduction mechanisms	PREDICTED: probable LRR receptor-like serine/threonine-protein kinase At1g06840 isoform X2 [Pyrus x bretschneideri]
MD05G1306400	0.448793	0.077147	0.067998	1.65951	0.871755	1.01947	0.243424	0.242856	0.618492	2.89883	1.12022	2.00442	[ET]	--	--	K05387|0|mdm:103435090|K05387 glutamate receptor, ionotropic, plant | (RefSeq) glutamate receptor 2.7-like	[PET]	--	Glutamate receptor 2.5 OS=Arabidopsis thaliana OX=3702 GN=GLR2.5 PE=2 SV=2	S	Function unknown	PREDICTED: glutamate receptor 2.7-like [Malus domestica]
MD10G1259600	3.67593	2.59116	1.64025	1.59835	2.15741	2.33736	3.1138	4.03619	2.45731	0.723409	1.59702	0.040787	--	--	--	--	--	--	F-box protein At5g46170 OS=Arabidopsis thaliana OX=3702 GN=At5g46170 PE=2 SV=1	S	Function unknown	PREDICTED: F-box protein At5g46170-like [Malus domestica]
MD12G1045600	1.30379	1.14319	0.292066	1.50182	1.40784	1.38522	0.974761	0.772873	0.364395	2.14786	1.88237	2.00461	[Q]	Secondary metabolites biosynthesis, transport and catabolism	Biological Process: etioplast organization (GO:0009662);; Biological Process: carotenoid biosynthetic process (GO:0016117);; Molecular Function: carotenoid isomerase activity (GO:0046608);;	K09835|7.79089e-153|mdm:103423243|K09835 prolycopene isomerase [EC:5.2.1.13] | (RefSeq) prolycopene isomerase, chloroplastic-like	[H]	Coenzyme transport and metabolism	Prolycopene isomerase, chloroplastic OS=Arabidopsis thaliana OX=3702 GN=CRTISO PE=1 SV=2	Q	Secondary metabolites biosynthesis, transport and catabolism	PREDICTED: LOW QUALITY PROTEIN: prolycopene isomerase, chloroplastic-like [Malus domestica]
MD02G1299800	2.14727	3.02516	3.0662	1.45068	0.502221	2.79345	5.65927	3.86146	6.98039	2.28515	2.05061	1.66988	[M]	Cell wall/membrane/envelope biogenesis	--	--	--	--	Acyl-CoA--sterol O-acyltransferase 1 OS=Arabidopsis thaliana OX=3702 GN=ASAT1 PE=1 SV=1	S	Function unknown	PREDICTED: acyl-CoA--sterol O-acyltransferase 1-like [Malus domestica]
MD15G1164600	0.968516	1.4591	1.99133	1.44413	0.890949	1.3785	1.41102	0.78511	0.745392	1.63819	2.17689	1.51998	[T]	Signal transduction mechanisms	Molecular Function: voltage-gated chloride channel activity (GO:0005247);; Cellular Component: intracellular (GO:0005622);; Biological Process: chloride transport (GO:0006821);; Cellular Component: integral component of membrane (GO:0016021);; Molecular Function: adenyl nucleotide binding (GO:0030554);; Biological Process: transmembrane transport (GO:0055085);;	K05016|0|mdm:103400064|K05016 chloride channel 7 | (RefSeq) putative chloride channel-like protein CLC-g	[P]	Inorganic ion transport and metabolism	Putative chloride channel-like protein CLC-g OS=Arabidopsis thaliana OX=3702 GN=CLC-G PE=1 SV=2	P	Inorganic ion transport and metabolism	PREDICTED: putative chloride channel-like protein CLC-g [Malus domestica]
MD00G1187200	193.817	556.967	195.622	1.3875	1.39106	0.797746	140.332	171.792	188.112	5.13675	13.9432	3.47219	--	--	Biological Process: lipid transport (GO:0006869);; Molecular Function: lipid binding (GO:0008289);;	--	--	--	Non-specific lipid-transfer protein 8 OS=Arabidopsis thaliana OX=3702 GN=LTP8 PE=3 SV=1	U	Intracellular trafficking, secretion, and vesicular transport	PREDICTED: non-specific lipid-transfer protein 8-like [Malus domestica]
MD02G1222400	1.14673	1.59854	0.98972	1.26931	0.519082	1.49313	1.25812	1.20939	1.38267	5.63884	1.68475	3.57334	[T]	Signal transduction mechanisms	Molecular Function: protein serine/threonine kinase activity (GO:0004674);; Molecular Function: ATP binding (GO:0005524);; Biological Process: protein phosphorylation (GO:0006468);;	--	[T]	Signal transduction mechanisms	Probable serine/threonine-protein kinase PBL19 OS=Arabidopsis thaliana OX=3702 GN=PBL19 PE=1 SV=1	T	Signal transduction mechanisms	PREDICTED: probable receptor-like protein kinase At5g47070 [Malus domestica]
MD03G1215600	17.6849	17.7556	9.12149	1.2526	0.547816	1.4283	23.4413	24.1301	12.6364	0.516929	0.380098	0.460514	--	--	--	--	--	--	--	S	Function unknown	PREDICTED: uncharacterized protein LOC103429520 [Malus domestica]
MD06G1017100	2.93124	2.98451	3.09329	1.15427	0.878865	1.47196	2.9282	2.97331	3.46187	0.756678	0.45508	0.136234	--	--	--	--	--	--	--	S	Function unknown	PREDICTED: uncharacterized protein LOC103436796 [Malus domestica]
MD13G1017000	1.54196	5.8685	10.2327	1.11789	1.55344	1.4999	2.10235	4.83256	1.43777	1.18251	1.77884	0.585831	[T]	Signal transduction mechanisms	Molecular Function: phosphorelay sensor kinase activity (GO:0000155);; Molecular Function: phosphorelay response regulator activity (GO:0000156);; Biological Process: phosphorelay signal transduction system (GO:0000160);; Molecular Function: ATP binding (GO:0005524);; Biological Process: regulation of transcription, DNA-templated (GO:0006355);; Cellular Component: membrane (GO:0016020);; Biologic…	K14489|0|mdm:103451518|K14489 arabidopsis histidine kinase 2/3/4 (cytokinin receptor) [EC:2.7.13.3] | (RefSeq) CHK4a; histidine kinase 4	[T]	Signal transduction mechanisms	Histidine kinase 4 OS=Arabidopsis thaliana OX=3702 GN=AHK4 PE=1 SV=1	T	Signal transduction mechanisms	PREDICTED: histidine kinase 4 [Malus domestica]
MD09G1192000	3.34284	3.46994	3.53418	1.11639	1.01278	0.709835	3.40295	3.60293	4.28819	1.27027	0.898186	0.796738	--	--	Cellular Component: nucleus (GO:0005634);; Biological Process: nucleosome assembly (GO:0006334);;	K11279|4.30966e-160|pper:PRUPE_ppa006998mg|K11279 nucleosome assembly protein 1-like 1 | (RefSeq) hypothetical protein	[BD]	--	Nucleosome assembly protein 1;2 OS=Oryza sativa subsp. japonica OX=39947 GN=NAP1;2 PE=2 SV=1	S	Function unknown	nucleosome assembly protein 1;4 isoform X1 [Prunus persica]
MD06G1188400	1.04175	3.66912	2.82232	1.01104	0.165904	0.51482	1.46977	1.97237	1.88028	0.086294	0.148288	0.207632	--	--	--	--	--	--	Protein QUIRKY OS=Arabidopsis thaliana OX=3702 GN=QKY PE=2 SV=1	S	Function unknown	PREDICTED: protein QUIRKY [Malus domestica]
MD02G1267300	4.68046	1.70145	2.02601	1.00421	0	0	2.70036	1.98674	0	0	0	3.45595	[V]	Defense mechanisms	Molecular Function: binding (GO:0005488);; Molecular Function: methyltransferase activity (GO:0008168);; Biological Process: histone methylation (GO:0016571);; Cellular Component: intracellular organelle (GO:0043229);;	K11420|0|mdm:103409193|K11420 euchromatic histone-lysine N-methyltransferase [EC:2.1.1.43] | (RefSeq) histone-lysine N-methyltransferase, H3 lysine-9 specific SUVH1-like	[BK]	--	Histone-lysine N-methyltransferase, H3 lysine-9 specific SUVH1 OS=Arabidopsis thaliana OX=3702 GN=SUVH1 PE=2 SV=1	S	Function unknown	PREDICTED: histone-lysine N-methyltransferase, H3 lysine-9 specific SUVH1-like [Malus domestica]
MD02G1267000	2.12547	1.02234	0.067854	0.984963	0.391505	0.399953	0.935414	1.73912	1.84181	1.1254	1.45985	0.582706	[G]	Carbohydrate transport and metabolism	--	--	[R]	General function prediction only	Protein ZINC INDUCED FACILITATOR-LIKE 1 OS=Arabidopsis thaliana OX=3702 GN=ZIFL1 PE=2 SV=1	G	Carbohydrate transport and metabolism	PREDICTED: protein ZINC INDUCED FACILITATOR-LIKE 1-like isoform X1 [Malus domestica]
MD13G1280800	0.315779	2.77671	1.58219	0.84024	0.612206	0.835082	0.266183	1.27194	0.212189	0.318085	1.2129	0.412232	[G]	Carbohydrate transport and metabolism	Molecular Function: zinc ion binding (GO:0008270);; Biological Process: lignin biosynthetic process (GO:0009809);; Molecular Function: cinnamyl-alcohol dehydrogenase activity (GO:0045551);; Cellular Component: apoplast (GO:0048046);; Biological Process: oxidation-reduction process (GO:0055114);;	K00083|0|mdm:103425234|K00083 cinnamyl-alcohol dehydrogenase [EC:1.1.1.195] | (RefSeq) probable mannitol dehydrogenase	[Q]	Secondary metabolites biosynthesis, transport and catabolism	Probable cinnamyl alcohol dehydrogenase 9 OS=Arabidopsis thaliana OX=3702 GN=CAD9 PE=2 SV=2	C	Energy production and conversion	PREDICTED: probable mannitol dehydrogenase [Malus domestica]
MD10G1034400	0.00626	1.07293	0.00075	0.814485	0.399541	0.058375	0.975437	0.513224	1.49281	0.094327	1.30135	0	--	--	--	--	--	--	TMV resistance protein N OS=Nicotiana glutinosa OX=35889 GN=N PE=1 SV=1	S	Function unknown	PREDICTED: TMV resistance protein N-like isoform X1 [Malus domestica]
MD10G1211100	3.55436	3.87189	2.64784	0.775376	0.962824	2.05432	3.45655	4.17718	3.92492	1.28433	0.497954	1.03916	--	--	--	K17822|0|mdm:103445879|K17822 DCN1-like protein 1/2 | (RefSeq) DCN1-like protein 1	[S]	Function unknown	--	S	Function unknown	PREDICTED: DCN1-like protein 1 [Malus domestica]
Apple_newGene_81814	0.267141	0.118042	0.206744	0.677523	0.106856	0.687996	0.923821	0.141213	0.771394	2.26227	1.63114	5.01231	--	--	--	--	[R]	General function prediction only	Retrovirus-related Pol polyprotein from transposon TNT 1-94 OS=Nicotiana tabacum OX=4097 PE=2 SV=1	L	Replication, recombination and repair	uncharacterized protein LOC110755101 [Prunus avium]
MD12G1191700	0.494231	1.68199	1.4408	0.645942	0.507694	0.611484	0.860932	0.589577	0.81869	0.550028	0.467046	0.272247	--	--	--	--	--	--	--	S	Function unknown	PREDICTED: flocculation protein FLO11-like [Malus domestica]
MD05G1309700	1.61116	5.10314	4.25917	0.623023	0.273262	0.518559	1.83325	2.96829	3.50178	0.634324	0.638177	0.31658	--	--	Molecular Function: DNA binding (GO:0003677);; Molecular Function: protein kinase activity (GO:0004672);; Molecular Function: ATP binding (GO:0005524);; Biological Process: regulation of transcription, DNA-templated (GO:0006355);; Biological Process: protein phosphorylation (GO:0006468);; Biological Process: ethylene biosynthetic process (GO:0009693);;	--	--	--	NAC domain-containing protein 73 OS=Arabidopsis thaliana OX=3702 GN=NAC073 PE=2 SV=1	S	Function unknown	PREDICTED: NAC domain-containing protein 73 [Malus domestica]
MD12G1103000	0.566366	1.46494	2.0505	0.608509	0.290856	0.315738	1.09127	0.979493	0.939077	0.226927	0.310977	0.144921	--	--	--	--	--	--	--	S	Function unknown	PREDICTED: uncharacterized protein LOC103933506 [Pyrus x bretschneideri]
MD13G1163500	2.35549	2.48957	2.87635	0.60676	0.956366	0.732898	2.12493	2.35546	1.74002	0.430231	0.978899	1.16607	--	--	--	--	[R]	General function prediction only	Peptidyl-prolyl cis-trans isomerase FKBP62 OS=Arabidopsis thaliana OX=3702 GN=FKBP62 PE=1 SV=2	S	Function unknown	PREDICTED: nucleoporin nup189 [Pyrus x bretschneideri]
MD00G1104700	1.88637	7.9095	3.23581	0.572036	1.22345	1.32771	0	9.61787	2.06244	0.137613	0	0.24351	--	--	Molecular Function: DNA binding (GO:0003677);; Molecular Function: chromatin binding (GO:0003682);;	K09422|0|mdm:103439463|K09422 myb proto-oncogene protein, plant | (RefSeq) MYB19, MdMYBB; protein ODORANT1-like	[K]	Transcription	Protein ODORANT1 OS=Petunia hybrida OX=4102 GN=ODO1 PE=2 SV=1	K	Transcription	protein ODORANT1-like [Malus domestica]
MD06G1152600	0	0	0	0.454398	0	0.305289	0	0.976461	0	0.2141	0	0	--	--	--	K07739|4.40163e-29|mdm:103408381|K07739 elongator complex protein 3 [EC:2.3.1.48] | (RefSeq) elongator complex protein 3-like	[BK]	--	Elongator complex protein 3 OS=Oryza sativa subsp. japonica OX=39947 GN=ELP3 PE=2 SV=2	BK	--	PREDICTED: elongator complex protein 3-like [Malus domestica]
MD07G1201200	1.98454	3.33668	2.77033	0.417849	0.175976	0.368906	2.30237	4.05276	3.38146	0.271988	0.02212	0	--	--	--	--	--	--	--	S	Function unknown	unknown [Lotus japonicus]
MD08G1237600	0.050301	0.418082	0.077153	0.368719	0.100073	0.003596	0.131035	0.012122	0.093338	2.1e-05	0.000601	6.8e-05	[E]	Amino acid transport and metabolism	Molecular Function: serine-type carboxypeptidase activity (GO:0004185);; Biological Process: proteolysis (GO:0006508);;	K16297|5.04904e-134|mdm:103441946|K16297 serine carboxypeptidase-like clade II [EC:3.4.16.-] | (RefSeq) serine carboxypeptidase-like 45	[OE]	--	Serine carboxypeptidase-like 45 OS=Arabidopsis thaliana OX=3702 GN=SCPL45 PE=2 SV=1	E	Amino acid transport and metabolism	PREDICTED: serine carboxypeptidase-like 45 [Malus domestica]
MD06G1097000	10.2256	15.8067	8.72106	0.360346	0.373065	0.591371	5.54361	5.74633	11.0644	0.335628	0.360701	0.182474	[T]	Signal transduction mechanisms	--	--	[P]	Inorganic ion transport and metabolism	Cation/H(+) antiporter 18 OS=Arabidopsis thaliana OX=3702 GN=CHX18 PE=2 SV=1	P	Inorganic ion transport and metabolism	PREDICTED: cation/H(+) antiporter 18 [Malus domestica]
MD08G1148200	0.460159	1.08926	0.894321	0.295286	0.441475	0	3.8e-05	0.005339	0.647641	0.199202	0	0.408398	--	--	--	--	[R]	General function prediction only	Pentatricopeptide repeat-containing protein At4g21065 OS=Arabidopsis thaliana OX=3702 GN=PCMP-H28 PE=2 SV=2	S	Function unknown	PREDICTED: pentatricopeptide repeat-containing protein At4g21065-like [Malus domestica]
MD06G1218500	1.45846	0.376178	0.528327	0.292333	0.021299	0.315167	2.49909	0.236464	1.44198	0.3446	0.158131	0.790277	--	--	--	--	[T]	Signal transduction mechanisms	LEAF RUST 10 DISEASE-RESISTANCE LOCUS RECEPTOR-LIKE PROTEIN KINASE-like 2.1 OS=Arabidopsis thaliana OX=3702 GN=LRK10L-2.1 PE=3 SV=1	T	Signal transduction mechanisms	PREDICTED: LEAF RUST 10 DISEASE-RESISTANCE LOCUS RECEPTOR-LIKE PROTEIN KINASE-like 2.1 [Malus domestica]
MD03G1268200	1.87993	0.956702	0.048122	0.251337	0.361248	0	4.22733	0.080078	0.744368	0	0.960669	0	--	--	--	--	--	--	Protein WHAT&apos;S THIS FACTOR 1 homolog OS=Arabidopsis thaliana OX=3702 GN=At4g01037 PE=3 SV=1	S	Function unknown	PREDICTED: protein ROOT PRIMORDIUM DEFECTIVE 1 [Malus domestica]
MD09G1271000	0.465644	1.39318	1.73661	0.241018	0.442443	0.060143	0.620424	1.48818	0.451897	0.048125	0	0	--	--	--	--	--	--	Cysteine-rich repeat secretory protein 60 OS=Arabidopsis thaliana OX=3702 GN=CRRSP60 PE=1 SV=1	U	Intracellular trafficking, secretion, and vesicular transport	PREDICTED: cysteine-rich repeat secretory protein 60-like [Pyrus x bretschneideri]
MD15G1415200	12.8334	15.7871	9.7952	0.191987	0.374588	0.058629	11.5335	8.76231	16.49	2.73679	0.966439	0.894559	[N]	Cell motility	--	--	--	--	Cellulose synthase-like protein G2 OS=Arabidopsis thaliana OX=3702 GN=CSLG2 PE=2 SV=1	M	Cell wall/membrane/envelope biogenesis	PREDICTED: cellulose synthase-like protein G2 isoform X2 [Malus domestica]
MD05G1042300	0.201219	2.4056	2.28603	0.174678	0.355919	0.087742	0.060509	0.698524	0.200594	0.025673	0.120219	0	--	--	--	--	--	--	--	S	Function unknown	PREDICTED: uncharacterized protein LOC103443871 [Malus domestica]
MD10G1205500	0.760824	0.428094	0.762387	0.168684	0.101933	0.14877	0.669515	1.10284	0.35956	0.040355	0.140238	0.090533	--	--	--	K20403|5.09294e-35|mdm:103435407|K20403 TELO2-interacting protein 1 | (RefSeq) uncharacterized LOC103435407	[S]	Function unknown	--	S	Function unknown	PREDICTED: uncharacterized protein LOC103435407 [Malus domestica]
MD01G1178700	0.388256	0.037882	0.123451	0.146521	0.25647	0.074184	0.230076	0.070918	0.135082	0.005411	0.005245	0.075131	[K]	Transcription	--	--	[R]	General function prediction only	Receptor-like protein EIX2 OS=Solanum lycopersicum OX=4081 GN=EIX2 PE=1 SV=2	S	Function unknown	PREDICTED: leucine-rich repeat receptor protein kinase MSP1-like [Malus domestica]
MD00G1112400	1.15262	0.391087	1.46603	0.139542	0.191202	0.284086	4.04206	1.87706	1.7349	0	0.086951	0.126366	--	--	Biological Process: regulation of transcription, DNA-templated (GO:0006355);;	--	--	--	Scarecrow-like protein 32 OS=Arabidopsis thaliana OX=3702 GN=SCL32 PE=1 SV=1	S	Function unknown	PREDICTED: scarecrow-like protein 32 [Malus domestica]
MD15G1173800	14.185	21.6174	8.41141	0.132707	0.159174	0	18.9876	64.9245	16.7267	0.231984	0.397962	0.201261	[E]	Amino acid transport and metabolism	--	K14638|0|mdm:103415744|K14638 solute carrier family 15 (peptide/histidine transporter), member 3/4 | (RefSeq) protein NRT1/ PTR FAMILY 6.2-like	[E]	Amino acid transport and metabolism	Protein NRT1/ PTR FAMILY 6.2 OS=Arabidopsis thaliana OX=3702 GN=NPF6.2 PE=1 SV=1	E	Amino acid transport and metabolism	PREDICTED: protein NRT1/ PTR FAMILY 6.2-like [Malus domestica]
MD01G1045500	10.6875	5.44629	5.36881	0.127828	0.028871	0.215666	11.5611	9.92028	8.02781	1.66666	0.247731	0.460226	--	--	--	--	--	--	Transcription factor bHLH93 OS=Arabidopsis thaliana OX=3702 GN=BHLH93 PE=1 SV=1	K	Transcription	PREDICTED: transcription factor bHLH93 [Malus domestica]
MD03G1076400	0.996743	4.69563	5.11568	0.122717	1.07742	1.23356	0.383085	1.44952	0.483561	0.362586	0.054659	0	[DPM]	--	Molecular Function: copper ion binding (GO:0005507);; Molecular Function: L-ascorbate oxidase activity (GO:0008447);; Biological Process: plant-type secondary cell wall biogenesis (GO:0009834);; Biological Process: lignin catabolic process (GO:0046274);; Cellular Component: apoplast (GO:0048046);; Molecular Function: hydroquinone:oxygen oxidoreductase activity (GO:0052716);; Biological Process: o…	K05909|0|mdm:103427122|K05909 laccase [EC:1.10.3.2] | (RefSeq) laccase-4-like	[Q]	Secondary metabolites biosynthesis, transport and catabolism	Laccase-4 OS=Arabidopsis thaliana OX=3702 GN=IRX12 PE=2 SV=2	Q	Secondary metabolites biosynthesis, transport and catabolism	PREDICTED: laccase-4 [Malus domestica]
MD15G1049700	0.706917	5.97171	5.42895	0.119801	0.367529	0.443672	0.202853	0.625744	0.268393	0	0	0	--	--	--	--	--	--	--	S	Function unknown	PREDICTED: uncharacterized protein LOC103455775 [Malus domestica]
MD12G1161000	0.865179	20.0263	19.7542	0.106201	1.34991	1.52486	0.138509	1.09876	0.067151	0.035266	0.037946	0.014823	[P]	Inorganic ion transport and metabolism	Molecular Function: copper ion binding (GO:0005507);; Biological Process: plant-type secondary cell wall biogenesis (GO:0009834);; Biological Process: lignin catabolic process (GO:0046274);; Cellular Component: apoplast (GO:0048046);; Molecular Function: hydroquinone:oxygen oxidoreductase activity (GO:0052716);; Biological Process: oxidation-reduction process (GO:0055114);;	K05909|0|mdm:103450543|K05909 laccase [EC:1.10.3.2] | (RefSeq) laccase-4-like	[Q]	Secondary metabolites biosynthesis, transport and catabolism	Laccase-4 OS=Arabidopsis thaliana OX=3702 GN=IRX12 PE=2 SV=2	Q	Secondary metabolites biosynthesis, transport and catabolism	PREDICTED: laccase-4-like [Malus domestica]
MD12G1185700	1.15861	4.481	3.2192	0.09658	0.211401	0.089919	0.557632	2.06696	0.357507	0.071547	0	0.086793	--	--	--	--	--	--	Transcription repressor OFP2 OS=Arabidopsis thaliana OX=3702 GN=OFP2 PE=1 SV=1	S	Function unknown	PREDICTED: transcription repressor OFP2-like [Malus domestica]
MD15G1061100	75.3762	50.083	21.3697	0.088274	0.155135	0.218008	66.1413	15.0925	47.0177	0.619266	0.216031	0.375057	--	--	Biological Process: dephosphorylation (GO:0016311);; Molecular Function: pyrophosphatase activity (GO:0016462);; Molecular Function: phosphatase activity (GO:0016791);;	K13248|0|mdm:103424640|K13248 pyridoxal phosphate phosphatase PHOSPHO2 [EC:3.1.3.74] | (RefSeq) inorganic pyrophosphatase 2-like	[R]	General function prediction only	Inorganic pyrophosphatase 2 OS=Arabidopsis thaliana OX=3702 GN=At1g17710 PE=2 SV=1	S	Function unknown	PREDICTED: inorganic pyrophosphatase 2-like [Malus domestica]
MD15G1077100	2.4345	4.96849	3.65278	0.083394	0.038468	0	0.874018	1.4054	0.488331	0	0.061506	0.059858	--	--	Cellular Component: nucleus (GO:0005634);;	K14505|0|mdm:103424674|K14505 cyclin D3, plant | (RefSeq) cyclin-D3-1-like	[D]	Cell cycle control, cell division, chromosome partitioning	Cyclin-D3-1 OS=Arabidopsis thaliana OX=3702 GN=CYCD3-1 PE=1 SV=3	D	Cell cycle control, cell division, chromosome partitioning	PREDICTED: cyclin-D3-1-like [Malus domestica]
MD17G1174800	2.58718	1.37083	2.62811	0.080567	0.036397	0.206365	2.33017	1.00722	3.22817	0.181982	0.0984	0.033488	--	--	--	--	--	--	--	S	Function unknown	PREDICTED: uncharacterized protein LOC103934096 isoform X2 [Pyrus x bretschneideri]
MD12G1017400	2.03029	2.76122	5.13569	0.052235	0.0253	0	2.90723	6.35021	2.58969	0.079639	0	0	[H]	Coenzyme transport and metabolism	--	K05928|0|pxb:103942764|K05928 tocopherol O-methyltransferase [EC:2.1.1.95] | (RefSeq) tocopherol O-methyltransferase, chloroplastic-like	[IR]	--	Tocopherol O-methyltransferase, chloroplastic OS=Arabidopsis thaliana OX=3702 GN=VTE4 PE=1 SV=2	S	Function unknown	PREDICTED: tocopherol O-methyltransferase, chloroplastic-like [Pyrus x bretschneideri]
MD07G1010600	1.82305	7.35437	5.37794	0.049709	0	0.026899	0.615224	1.86381	0.923964	0	0	0	--	--	--	--	--	--	--	S	Function unknown	PREDICTED: uncharacterized protein LOC103438399 [Malus domestica]
MD17G1007400	0.745944	2.05808	1.41001	0.041496	0	0	0.310631	1.2682	0.77522	0	0.034563	0	--	--	--	--	--	--	Transcription factor ICE1 OS=Arabidopsis thaliana OX=3702 GN=SCRM PE=1 SV=1	K	Transcription	PREDICTED: transcription factor ICE1-like [Malus domestica]
MD10G1033100	0.050938	0.005226	0.029116	0.038158	0.099609	0.009164	0.006151	0.00554	0.060946	0.071448	0.194483	0.06078	--	--	--	--	[U]	Intracellular trafficking, secretion, and vesicular transport	Histone-lysine N-methyltransferase ASHH1 OS=Arabidopsis thaliana OX=3702 GN=ASHH1 PE=1 SV=1	S	Function unknown	PREDICTED: histone-lysine N-methyltransferase ASHH1-like [Malus domestica]
MD16G1184300	0.236944	0.811449	2.97029	0.035559	0.076751	0.029313	0.13505	0.650345	0.068976	0	0.020133	0.013437	--	--	Biological Process: metal ion transport (GO:0030001);; Molecular Function: metal ion binding (GO:0046872);;	--	[P]	Inorganic ion transport and metabolism	Heavy metal-associated isoprenylated plant protein 32 OS=Arabidopsis thaliana OX=3702 GN=HIPP32 PE=2 SV=1	S	Function unknown	PREDICTED: keratin, type I cytoskeletal 9-like [Malus domestica]
MD03G1219500	19.8475	0.765456	7.65767	0.012636	7.10063	0.000193	6.31271	1.89962	13.0449	0.004437	7.24411	0.000616	--	--	--	--	--	--	--	S	Function unknown	PREDICTED: uncharacterized protein LOC103430154 [Malus domestica]
MD01G1197200	1.98752	3.55691	12.714	0.011086	0.020957	0.035873	1.26068	12.4462	2.65737	0	0.04234	0	--	--	--	--	--	--	F-box protein PP2-A13 OS=Arabidopsis thaliana OX=3702 GN=PP2A13 PE=1 SV=1	S	Function unknown	PREDICTED: F-box protein PP2-A13-like [Malus domestica]
MD07G1282100	3.82328	1.06998	3.88162	0	0.010308	0.021712	4.99908	4.19862	4.37394	0.055923	0	0	[V]	Defense mechanisms	--	--	--	--	S-type anion channel SLAH3 OS=Arabidopsis thaliana OX=3702 GN=SLAH3 PE=1 SV=1	P	Inorganic ion transport and metabolism	PREDICTED: S-type anion channel SLAH2-like [Malus domestica]
MD17G1056100	3.8513	7.54148	10.0396	0	0.02536	0	2.62903	4.41305	3.4208	0	0	0.065354	--	--	--	--	--	--	Phenolic glucoside malonyltransferase 2 OS=Arabidopsis thaliana OX=3702 GN=PMAT2 PE=1 SV=1	S	Function unknown	PREDICTED: phenolic glucoside malonyltransferase 2-like [Malus domestica]
MD11G1115800	1.96765	2.50853	8.21764	0	0.083958	0.095969	2.07308	4.33589	6.21222	0.22062	0.096925	0.107203	--	--	--	--	--	--	Dirigent protein 10 OS=Arabidopsis thaliana OX=3702 GN=DIR10 PE=2 SV=1	S	Function unknown	PREDICTED: dirigent protein 25-like [Malus domestica]
MD07G1110600	1.00493	1.41103	2.40484	0	0	0	1.64255	4.49452	0.680193	0	0	0	[Q]	Secondary metabolites biosynthesis, transport and catabolism	--	K17912|0|pxb:103962245|K17912 9-cis-beta-carotene 9',10'-cleaving dioxygenase [EC:1.13.11.68] | (RefSeq) carotenoid cleavage dioxygenase 7, chloroplastic	[Q]	Secondary metabolites biosynthesis, transport and catabolism	Carotenoid cleavage dioxygenase 7, chloroplastic OS=Arabidopsis thaliana OX=3702 GN=CCD7 PE=1 SV=1	Q	Secondary metabolites biosynthesis, transport and catabolism	carotenoid cleavage dioxygenase 7 [Malus domestica]
MD04G1168400	0.550017	0.097245	1.51947	0	0	0.026158	1.22776	1.50821	11.1669	0.183334	0	0.366414	[IQR]	--	Molecular Function: 3-oxoacyl-[acyl-carrier-protein] reductase (NADPH) activity (GO:0004316);; Biological Process: oxidation-reduction process (GO:0055114);;	--	[R]	General function prediction only	Short-chain dehydrogenase reductase 2a OS=Arabidopsis thaliana OX=3702 GN=SDR2a PE=3 SV=1	S	Function unknown	PREDICTED: short-chain dehydrogenase reductase 2a-like [Malus domestica]
MD07G1180500	0.023619	0.068664	0.555712	0	0	0	0.02145	0.372575	0.033996	0	0	0	--	--	--	K14638|0|mdm:103410254|K14638 solute carrier family 15 (peptide/histidine transporter), member 3/4 | (RefSeq) protein NRT1/ PTR FAMILY 2.6-like	[E]	Amino acid transport and metabolism	Protein NRT1/ PTR FAMILY 2.6 OS=Arabidopsis thaliana OX=3702 GN=NPF2.6 PE=2 SV=1	E	Amino acid transport and metabolism	PREDICTED: protein NRT1/ PTR FAMILY 2.6-like [Malus domestica]
MD10G1146500	0.165429	0.10326	0.121643	0	0	0	0.346449	0.348955	0.058494	0	0	0	--	--	--	--	--	--	UPF0481 protein At3g47200 OS=Arabidopsis thaliana OX=3702 GN=At3g47200 PE=2 SV=1	S	Function unknown	PREDICTED: UPF0481 protein At3g47200-like [Malus domestica]
MD03G1022700	0.249615	0.922304	1.46582	0	0	0.046059	0.301079	0.547361	0.379221	0	0	0	--	--	Biological Process: regulation of cell cycle (GO:0051726);;	K05868|0|pxb:103967832|K05868 cyclin B | (RefSeq) G2/mitotic-specific cyclin S13-7-like	[D]	Cell cycle control, cell division, chromosome partitioning	G2/mitotic-specific cyclin-2 OS=Antirrhinum majus OX=4151 PE=2 SV=1	D	Cell cycle control, cell division, chromosome partitioning	PREDICTED: G2/mitotic-specific cyclin S13-7-like [Pyrus x bretschneideri]
MD15G1220700	0.094829	0.264276	0.127674	0	0.088687	0.177757	0.125988	0.537912	0.146461	0.046459	0	0.150667	[J]	Translation, ribosomal structure and biogenesis	--	K13201|1.56549e-31|mdm:103406958|K13201 nucleolysin TIA-1/TIAR | (RefSeq) oligouridylate-binding protein 1-like	[R]	General function prediction only	Oligouridylate-binding protein 1 OS=Nicotiana plumbaginifolia OX=4092 GN=UBP1 PE=2 SV=1	S	Function unknown	PREDICTED: oligouridylate-binding protein 1-like, partial [Malus domestica]
MD12G1263700	0	0.25481	0	0	0	0.095179	0.087205	0	0	0.264623	0.277004	0.291702	--	--	--	K14786|0|mdm:103451156|K14786 protein KRI1 | (RefSeq) protein KRI1 homolog	[J]	Translation, ribosomal structure and biogenesis	--	S	Function unknown	PREDICTED: protein kri1-like isoform X2 [Pyrus x bretschneideri]
Md/Mb leaf-to-root	Md/Mb +24 h r1	Md/Mb +24 h r2	Md/Mb +24 h r3	Md/Mb +24 h L1	Md/Mb +24 h L2	Md/Mb +24 h L3	Md/Mb -24 h r1	Md/Mb -24 h r2	Md/Mb -24 h r3	Md/Mb -24 h L1	Md/Mb -24 h L2	Md/Mb -24 h L3	COG_class	COG_class_annotation	GO_annotation	KEGG_annotation	KOG_class	KOG_class_annotation	Swissprot_annotation	eggNOG_class	eggNOG_class_annotation	nr_annotation
MD14G1212100	51.7301	63.7506	60.3061	12287	12281.7	12255.9	99.0716	104.326	165.826	5959.72	6805.5	9499.78	[J]	Translation, ribosomal structure and biogenesis	Molecular Function: nucleotide binding (GO:0000166);; Molecular Function: nucleic acid binding (GO:0003676);;	K12741|2.62822e-111|mdm:103455425|K12741 heterogeneous nuclear ribonucleoprotein A1/A3 | (RefSeq) glycine-rich RNA-binding protein 4, mitochondrial-like	[R]	General function prediction only	Glycine-rich RNA-binding protein 3, mitochondrial OS=Arabidopsis thaliana OX=3702 GN=RBG3 PE=1 SV=1	S	Function unknown	PREDICTED: glycine-rich RNA-binding protein 4, mitochondrial-like [Malus domestica]
MD09G1235700	13.8649	19.1647	24.0616	1565.02	1517.3	1047.83	23.8666	22.5103	43.6045	548.449	770.501	1197.46	--	--	--	--	--	--	--	--	--	PREDICTED: cytochrome P450 716B1-like [Malus domestica]
MD16G1160700	2843.89	1034.56	1894.39	973.111	1213.31	1427.21	2667.86	2181.5	2145.86	777.122	948.492	1384.78	--	--	Biological Process: defense response (GO:0006952);; Biological Process: response to biotic stimulus (GO:0009607);;	--	--	--	Major allergen Mal d 1 OS=Malus domestica OX=3750 PE=1 SV=3	S	Function unknown	major allergen Mal d 1 [Malus domestica]
MD09G1146300	35.5366	9.42496	51.0065	465.332	695.805	514.901	57.4467	69.7743	73.0275	171.825	354.267	695.702	--	--	Molecular Function: calcium ion binding (GO:0005509);; Molecular Function: poly(U) RNA binding (GO:0008266);; Cellular Component: chloroplast thylakoid membrane (GO:0009535);; Cellular Component: chloroplast stroma (GO:0009570);; Cellular Component: photosystem II oxygen evolving complex (GO:0009654);; Cellular Component: chloroplast envelope (GO:0009941);; Biological Process: photosynthesis (GO:…	K02717|7.7197e-178|mdm:103443153|K02717 photosystem II oxygen-evolving enhancer protein 2 | (RefSeq) oxygen-evolving enhancer protein 2, chloroplastic-like	--	--	Oxygen-evolving enhancer protein 2, chloroplastic OS=Cucumis sativus OX=3659 GN=PSBP PE=2 SV=1	S	Function unknown	PREDICTED: oxygen-evolving enhancer protein 2, chloroplastic-like [Malus domestica]
MD07G1175900	0.740468	1.84503	3.23499	204.776	320.198	138.132	1.11007	2.84852	9.12436	41.1773	117.484	247.865	[F]	Nucleotide transport and metabolism	Molecular Function: CTP synthase activity (GO:0003883);; Biological Process: pyrimidine nucleotide biosynthetic process (GO:0006221);;	K01937|0|mdm:103432642|K01937 CTP synthase [EC:6.3.4.2] | (RefSeq) CTP synthase	[F]	Nucleotide transport and metabolism	--	F	Nucleotide transport and metabolism	PREDICTED: CTP synthase isoform X1 [Malus domestica]
MD10G1321500	0.569681	0.392926	1.72114	186.027	199.287	160.218	1.91512	3.31144	4.28395	69.5379	128.334	210.598	--	--	--	--	--	--	--	--	--	PREDICTED: uncharacterized protein LOC103402133 [Malus domestica]
MD16G1103000	23.9174	16.9028	28.6104	133.079	146.949	80.4747	20.0478	22.934	23.4614	39.8255	89.6325	175.112	--	--	--	--	--	--	Transcription factor bHLH147 OS=Arabidopsis thaliana OX=3702 GN=BHLH147 PE=1 SV=1	K	Transcription	PREDICTED: transcription factor bHLH149-like [Malus domestica]
MD15G1353800	31.419	49.9899	16.2723	131.97	44.8606	83.1297	14.6054	20.3637	72.8497	94.1747	122.483	167.05	[Q]	Secondary metabolites biosynthesis, transport and catabolism	Molecular Function: flavonol synthase activity (GO:0045431);; Biological Process: flavonol biosynthetic process (GO:0051555);; Biological Process: oxidation-reduction process (GO:0055114);;	K05278|0|pmum:103332906|K05278 flavonol synthase [EC:1.14.11.23] | (RefSeq) flavonol synthase/flavanone 3-hydroxylase-like	[QR]	--	Flavonol synthase/flavanone 3-hydroxylase OS=Citrus unshiu OX=55188 GN=FLS PE=1 SV=1	S	Function unknown	flavonol synthase/flavanone 3-hydroxylase-like [Prunus avium]
MD12G1195300	89.4889	137.253	78.4793	129.874	73.0913	103.575	59.4355	80.2007	127.895	133.771	137.79	75.9172	[G]	Carbohydrate transport and metabolism	Molecular Function: phosphoglycerate mutase activity (GO:0004619);; Cellular Component: cytoplasm (GO:0005737);; Biological Process: glycolytic process (GO:0006096);; Biological Process: response to stress (GO:0006950);; Molecular Function: manganese ion binding (GO:0030145);;	K15633|0|mdm:103450793|K15633 2,3-bisphosphoglycerate-independent phosphoglycerate mutase [EC:5.4.2.12] | (RefSeq) 2,3-bisphosphoglycerate-independent phosphoglycerate mutase	[G]	Carbohydrate transport and metabolism	2,3-bisphosphoglycerate-independent phosphoglycerate mutase OS=Mesembryanthemum crystallinum OX=3544 GN=PGM1 PE=2 SV=1	G	Carbohydrate transport and metabolism	PREDICTED: 2,3-bisphosphoglycerate-independent phosphoglycerate mutase [Malus domestica]
MD03G1173600	59.8792	89.4737	77.2195	87.0515	83.6892	121.58	66.2339	85.5535	94.6247	80.3313	82.7782	73.6489	[J]	Translation, ribosomal structure and biogenesis	Molecular Function: RNA binding (GO:0003723);; Molecular Function: structural constituent of ribosome (GO:0003735);; Biological Process: translation (GO:0006412);; Cellular Component: small ribosomal subunit (GO:0015935);;	K02981|6.61672e-167|mdm:103431729|K02981 small subunit ribosomal protein S2e | (RefSeq) 40S ribosomal protein S2-4-like	[J]	Translation, ribosomal structure and biogenesis	40S ribosomal protein S2-4 OS=Arabidopsis thaliana OX=3702 GN=RPS2D PE=2 SV=1	J	Translation, ribosomal structure and biogenesis	PREDICTED: 40S ribosomal protein S2-4-like [Malus domestica]
MD09G1108800	46.9517	42.6102	33.9141	81.1133	62.4422	100.283	34.4612	40.3671	38.4699	135.373	114.506	64.7477	--	--	Molecular Function: transcription cofactor activity (GO:0003712);; Molecular Function: histone acetyltransferase activity (GO:0004402);; Cellular Component: nucleus (GO:0005634);; Biological Process: regulation of transcription, DNA-templated (GO:0006355);; Molecular Function: zinc ion binding (GO:0008270);; Biological Process: histone acetylation (GO:0016573);;	K10523|0|mdm:103424463|K10523 speckle-type POZ protein | (RefSeq) BTB/POZ and TAZ domain-containing protein 1-like	[K]	Transcription	BTB/POZ and TAZ domain-containing protein 2 OS=Arabidopsis thaliana OX=3702 GN=BT2 PE=1 SV=1	S	Function unknown	PREDICTED: BTB/POZ and TAZ domain-containing protein 1-like [Pyrus x bretschneideri]
MD17G1270700	72.8409	86.2878	45.2956	78.9363	45.4836	71.6549	44.6152	42.3536	46.7973	83.1278	74.0675	48.2604	[C]	Energy production and conversion	Molecular Function: magnesium ion binding (GO:0000287);; Molecular Function: isocitrate dehydrogenase (NADP+) activity (GO:0004450);; Molecular Function: copper ion binding (GO:0005507);; Cellular Component: peroxisome (GO:0005777);; Cellular Component: plasma membrane (GO:0005886);; Biological Process: tricarboxylic acid cycle (GO:0006099);; Biological Process: isocitrate metabolic process (GO:0…	K00031|0|pxb:103959913|K00031 isocitrate dehydrogenase [EC:1.1.1.42] | (RefSeq) isocitrate dehydrogenase [NADP]	[C]	Energy production and conversion	Isocitrate dehydrogenase [NADP], chloroplastic (Fragment) OS=Medicago sativa OX=3879 PE=2 SV=1	C	Energy production and conversion	PREDICTED: isocitrate dehydrogenase [NADP] [Pyrus x bretschneideri]
MD10G1331100	57.9782	45.3471	44.9428	77.9648	35.2606	55.2781	41.2903	39.8699	56.8786	52.0741	70.4164	51.9719	[Q]	Secondary metabolites biosynthesis, transport and catabolism	Molecular Function: fumarylacetoacetase activity (GO:0004334);; Biological Process: aromatic amino acid family metabolic process (GO:0009072);;	K01555|0|mdm:103422481|K01555 fumarylacetoacetase [EC:3.7.1.2] | (RefSeq) fumarylacetoacetase-like	[G]	Carbohydrate transport and metabolism	Fumarylacetoacetase OS=Arabidopsis thaliana OX=3702 GN=FAH PE=1 SV=1	Q	Secondary metabolites biosynthesis, transport and catabolism	PREDICTED: LOW QUALITY PROTEIN: fumarylacetoacetase-like [Malus domestica]
MD02G1154400	14.4822	12.8073	12.6914	59.1202	49.1665	71.2762	13.8901	11.9504	17.0433	89.5529	72.2335	63.2431	--	--	--	--	--	--	Protein GLUTAMINE DUMPER 5 OS=Arabidopsis thaliana OX=3702 GN=GDU5 PE=2 SV=2	U	Intracellular trafficking, secretion, and vesicular transport	PREDICTED: protein GLUTAMINE DUMPER 5-like [Malus domestica]
MD01G1087400	9.07472	8.00678	7.29464	56.9572	26.4442	47.9441	3.80233	3.77162	6.45449	68.7466	65.3552	37.7815	--	--	--	--	--	--	Wall-associated receptor kinase-like 2 OS=Arabidopsis thaliana OX=3702 GN=WAKL2 PE=2 SV=1	T	Signal transduction mechanisms	PREDICTED: LOW QUALITY PROTEIN: wall-associated receptor kinase-like 22 [Malus domestica]
MD17G1281200	34.53	12.4758	39.0408	32.5262	52.0094	122.113	64.039	42.1815	22.8477	53.4931	30.5871	15.0681	[C]	Energy production and conversion	Biological Process: metabolic process (GO:0008152);; Molecular Function: 4 iron, 4 sulfur cluster binding (GO:0051539);;	K01681|0|mdm:103442605|K01681 aconitate hydratase [EC:4.2.1.3] | (RefSeq) aconitate hydratase, cytoplasmic	[AJ]	--	Aconitate hydratase 3, mitochondrial OS=Arabidopsis thaliana OX=3702 GN=ACO3 PE=1 SV=2	C	Energy production and conversion	PREDICTED: aconitate hydratase, cytoplasmic [Malus domestica]
MD11G1132800	37.5442	44.6154	34.3397	31.0099	43.4271	51.1484	30.734	36.8155	41.7066	35.1945	42.7876	40.2608	--	--	--	K09481|1.26956e-35|mdm:103418826|K09481 protein transport protein SEC61 subunit beta | (RefSeq) protein transport protein Sec61 subunit beta-like	[O]	Posttranslational modification, protein turnover, chaperones	Protein transport protein Sec61 subunit beta OS=Arabidopsis thaliana OX=3702 GN=At2g45070 PE=1 SV=1	U	Intracellular trafficking, secretion, and vesicular transport	PREDICTED: protein transport protein Sec61 subunit beta-like [Malus domestica]
MD16G1176100	45.201	32.6013	36.7253	29.9803	22.652	36.5381	40.6932	36.4774	49.9186	27.3835	34.0934	29.847	[IQ]	--	--	--	[CIQ]	--	Acyl carrier protein 1, chloroplastic OS=Casuarina glauca OX=3522 GN=ACP1 PE=2 SV=1	I	Lipid transport and metabolism	PREDICTED: acyl carrier protein 1, chloroplastic-like isoform X2 [Malus domestica]
MD04G1081000	52.1213	37.8506	34.4505	28.7849	21.9341	35.5966	28.1894	24.8116	31.1771	44.3762	32.5683	25.2085	[S]	Function unknown	Molecular Function: ATP binding (GO:0005524);; Biological Process: obsolete ATP catabolic process (GO:0006200);; Cellular Component: membrane (GO:0016020);; Molecular Function: ATPase activity, coupled to transmembrane movement of substances (GO:0042626);;	--	[Q]	Secondary metabolites biosynthesis, transport and catabolism	ABC transporter G family member 14 OS=Arabidopsis thaliana OX=3702 GN=ABCG14 PE=2 SV=1	V	Defense mechanisms	PREDICTED: ABC transporter G family member 14-like isoform X2 [Malus domestica]
MD14G1167000	14.9133	20.2403	13.7165	21.3219	18.0541	38.2891	30.6029	17.5488	20.0399	44.7859	41.6705	29.1811	[M]	Cell wall/membrane/envelope biogenesis	--	--	--	--	--	S	Function unknown	PREDICTED: polyvinylalcohol dehydrogenase-like [Malus domestica]
MD10G1191500	18.1923	12.0056	13.3796	21.2047	16.6164	21.967	12.8192	15.6383	20.8768	14.4374	16.3828	15.9463	--	--	--	--	[O]	Posttranslational modification, protein turnover, chaperones	E3 ubiquitin-protein ligase At4g11680 OS=Arabidopsis thaliana OX=3702 GN=At4g11680 PE=2 SV=1	O	Posttranslational modification, protein turnover, chaperones	PREDICTED: E3 ubiquitin-protein ligase At1g63170 isoform X2 [Malus domestica]
MD03G1028600	30.6345	25.4325	24.0241	20.0749	16.9489	18.2409	23.5009	19.7226	29.0302	22.3045	27.312	17.9137	[U]	Intracellular trafficking, secretion, and vesicular transport	Cellular Component: nucleus (GO:0005634);; Biological Process: toxin catabolic process (GO:0009407);; Biological Process: response to ethylene (GO:0009723);; Biological Process: abscisic acid-activated signaling pathway (GO:0009738);; Biological Process: response to cyclopentenone (GO:0010583);; Biological Process: methylglyoxal catabolic process to D-lactate via S-lactoyl-glutathione (GO:0019243…	--	--	--	--	U	Intracellular trafficking, secretion, and vesicular transport	PREDICTED: uncharacterized protein LOC103405949 [Malus domestica]
MD13G1090800	5.56721	5.7099	6.90765	18.9236	12.8154	31.931	8.64336	10.2377	7.63572	56.8418	12.5493	14.9914	--	--	--	--	--	--	--	S	Function unknown	PREDICTED: protein E6 [Malus domestica]
MD15G1013500	1.89633	0.87944	2.19302	18.7311	27.4648	23.1291	1.63424	2.27418	2.6858	10.0327	13.9202	25.4003	--	--	Molecular Function: catalytic activity (GO:0003824);; Biological Process: metabolic process (GO:0008152);;	--	--	--	--	S	Function unknown	PREDICTED: uncharacterized protein LOC103945150 [Pyrus x bretschneideri]
MD17G1191600	25.7252	19.8156	28.6127	18.6684	24.3343	19.0679	20.5064	3.36583	29.8859	3.1081	19.7837	19.9965	[T]	Signal transduction mechanisms	Molecular Function: phosphoprotein phosphatase activity (GO:0004721);;	K04382|0|pxb:103950907|K04382 serine/threonine-protein phosphatase 2A catalytic subunit [EC:3.1.3.16] | (RefSeq) serine/threonine-protein phosphatase PP2A catalytic subunit	[T]	Signal transduction mechanisms	Serine/threonine-protein phosphatase PP2A catalytic subunit OS=Hevea brasiliensis OX=3981 GN=PP2A PE=2 SV=1	T	Signal transduction mechanisms	PREDICTED: serine/threonine-protein phosphatase PP2A catalytic subunit [Malus domestica]
MD01G1208300	26.0461	35.4664	14.4099	18.5358	15.6508	17.5147	12.9615	16.0821	15.0924	26.1494	28.3521	23.3162	[G]	Carbohydrate transport and metabolism	Biological Process: glycogen biosynthetic process (GO:0005978);; Molecular Function: glucose-1-phosphate adenylyltransferase activity (GO:0008878);; Cellular Component: chloroplast (GO:0009507);; Biological Process: starch biosynthetic process (GO:0019252);;	K00975|0|mdm:103440384|K00975 glucose-1-phosphate adenylyltransferase [EC:2.7.7.27] | (RefSeq) glucose-1-phosphate adenylyltransferase large subunit 1-like	[M]	Cell wall/membrane/envelope biogenesis	Glucose-1-phosphate adenylyltransferase large subunit 1 (Fragment) OS=Solanum tuberosum OX=4113 GN=AGPS1 PE=1 SV=1	G	Carbohydrate transport and metabolism	PREDICTED: glucose-1-phosphate adenylyltransferase large subunit 1-like isoform X2 [Malus domestica]
MD16G1083300	8.56108	10.1363	4.19608	17.3589	32.3682	23.0772	5.06358	4.11434	7.90863	13.1764	21.3687	48.3386	--	--	Biological Process: defense response (GO:0006952);; Biological Process: response to biotic stimulus (GO:0009607);;	--	--	--	Major allergen Pru av 1 OS=Prunus avium OX=42229 GN=PRUA1 PE=1 SV=1	S	Function unknown	major allergen Mal d 1.03B [Malus domestica]
MD13G1160700	13.2352	80.9539	15.6156	16.7772	6.44262	8.33582	17.3496	20.017	29.1551	14.4448	13.9916	4.25749	[CE]	--	Molecular Function: magnesium ion binding (GO:0000287);; Molecular Function: isocitrate dehydrogenase (NAD+) activity (GO:0004449);; Biological Process: tricarboxylic acid cycle (GO:0006099);; Molecular Function: NAD binding (GO:0051287);;	K00030|0|mdm:103433221|K00030 isocitrate dehydrogenase (NAD+) [EC:1.1.1.41] | (RefSeq) isocitrate dehydrogenase [NAD] catalytic subunit 5, mitochondrial-like	[E]	Amino acid transport and metabolism	Isocitrate dehydrogenase [NAD] catalytic subunit 5, mitochondrial OS=Arabidopsis thaliana OX=3702 GN=IDH5 PE=1 SV=1	E	Amino acid transport and metabolism	PREDICTED: isocitrate dehydrogenase [NAD] catalytic subunit 5, mitochondrial-like [Malus domestica]
MD11G1009200	0	0.113822	0.121302	16.6959	7.09791	8.61905	0	0	1.12561	7.50476	10.2715	20.0696	[G]	Carbohydrate transport and metabolism	--	K01227|0|mdm:103427489|K01227 mannosyl-glycoprotein endo-beta-N-acetylglucosaminidase [EC:3.2.1.96] | (RefSeq) cytosolic endo-beta-N-acetylglucosaminidase 1-like	[R]	General function prediction only	Cytosolic endo-beta-N-acetylglucosaminidase 1 OS=Arabidopsis thaliana OX=3702 GN=ENGASE1 PE=1 SV=1	G	Carbohydrate transport and metabolism	PREDICTED: cytosolic endo-beta-N-acetylglucosaminidase 1-like [Malus domestica]
MD14G1160000	17.0379	20.4974	18.1419	15.6812	10.3031	17.1612	11.8677	14.6064	19.2515	13.8691	13.7437	8.433	[E]	Amino acid transport and metabolism	--	K14272|0|mdm:103403075|K14272 glutamate--glyoxylate aminotransferase [EC:2.6.1.4 2.6.1.2 2.6.1.44] | (RefSeq) glutamate--glyoxylate aminotransferase 2	[E]	Amino acid transport and metabolism	Glutamate--glyoxylate aminotransferase 2 OS=Arabidopsis thaliana OX=3702 GN=GGAT2 PE=1 SV=1	E	Amino acid transport and metabolism	PREDICTED: glutamate--glyoxylate aminotransferase 2 [Malus domestica]
MD01G1227200	25.2229	26.062	21.4177	12.7896	11.2437	14.7453	18.8241	17.3523	21.3716	16.4762	18.001	15.8896	--	--	Cellular Component: microtubule associated complex (GO:0005875);; Biological Process: microtubule-based process (GO:0007017);;	K10418|2.25932e-82|mdm:103452887|K10418 dynein light chain LC8-type | (RefSeq) dynein light chain 2, cytoplasmic-like	[Z]	Cytoskeleton	Dynein 8 kDa light chain, flagellar outer arm OS=Chlamydomonas reinhardtii OX=3055 PE=1 SV=1	S	Function unknown	PREDICTED: dynein light chain 2, cytoplasmic-like [Malus domestica]
MD03G1194700	18.2802	16.1039	22.9302	12.3563	10.6287	10.9439	14.9992	20.4896	23.8177	8.58678	13.8904	12.5545	--	--	--	--	--	--	RPM1-interacting protein 4 OS=Arabidopsis thaliana OX=3702 GN=RIN4 PE=1 SV=1	S	Function unknown	PREDICTED: uncharacterized protein LOC103967858 isoform X2 [Pyrus x bretschneideri]
MD16G1000400	78.0505	104.604	75.7334	12.312	20.4339	12.36	29.1546	46.603	68.7813	4.4037	12.2266	16.047	[C]	Energy production and conversion	Molecular Function: UDP-N-acetylmuramate dehydrogenase activity (GO:0008762);; Molecular Function: flavin adenine dinucleotide binding (GO:0050660);; Biological Process: oxidation-reduction process (GO:0055114);;	K09828|0|mdm:103403411|K09828 Delta24-sterol reductase [EC:1.3.1.72 1.3.1.-] | (RefSeq) delta(24)-sterol reductase-like	[R]	General function prediction only	Delta(24)-sterol reductase OS=Pisum sativum OX=3888 GN=DIM PE=1 SV=1	C	Energy production and conversion	PREDICTED: delta(24)-sterol reductase-like [Malus domestica]
MD04G1096100	14.0619	14.5692	15.3166	11.8845	9.42955	12.3997	14.3264	12.4414	14.3549	13.1593	11.1458	12.7799	--	--	Cellular Component: mitochondrial membrane (GO:0031966);;	K18182|5.51656e-84|mdm:103406263|K18182 cytochrome c oxidase assembly protein subunit 16 | (RefSeq) uncharacterized LOC103406263	[Z]	Cytoskeleton	--	S	Function unknown	PREDICTED: uncharacterized protein LOC103406263 [Malus domestica]
MD09G1082100	0.469843	0.857121	0.038544	11.8269	8.0576	6.71566	0.068205	0.188777	2.03977	7.68105	15.9341	24.1126	[O]	Posttranslational modification, protein turnover, chaperones	--	K01411|0|mdm:103418044|K01411 nardilysin [EC:3.4.24.61] | (RefSeq) nardilysin-like	[O]	Posttranslational modification, protein turnover, chaperones	Nardilysin-like OS=Arabidopsis thaliana OX=3702 GN=At1g06900 PE=2 SV=1	O	Posttranslational modification, protein turnover, chaperones	PREDICTED: nardilysin-like [Malus domestica]
MD10G1324500	7.06192	3.95783	1.93245	11.7524	5.62711	11.557	2.36108	1.54757	3.06061	28.3595	16.236	9.79535	--	--	--	K19476|0|pxb:103947127|K19476 vacuolar protein sorting-associated protein IST1 | (RefSeq) IST1 homolog	[Z]	Cytoskeleton	--	S	Function unknown	PREDICTED: IST1 homolog [Pyrus x bretschneideri]
MD17G1198000	17.519	16.1644	17.3499	10.8288	10.3708	7.08481	15.7983	17.5281	18.5207	7.23629	9.12064	10.5116	[T]	Signal transduction mechanisms	Molecular Function: protein serine/threonine kinase activity (GO:0004674);; Molecular Function: calcium ion binding (GO:0005509);; Molecular Function: ATP binding (GO:0005524);; Biological Process: protein phosphorylation (GO:0006468);;	--	[T]	Signal transduction mechanisms	CDPK-related kinase 4 OS=Arabidopsis thaliana OX=3702 GN=CRK4 PE=1 SV=1	T	Signal transduction mechanisms	PREDICTED: CDPK-related kinase 4-like [Malus domestica]
MD13G1075900	19.6845	12.9683	20.7431	10.6555	15.8568	14.3393	20.9799	20.4116	13.6567	7.84764	10.53	10.0043	[T]	Signal transduction mechanisms	--	--	[MOT]	--	F-box protein At1g70590 OS=Arabidopsis thaliana OX=3702 GN=At1g70590 PE=2 SV=1	S	Function unknown	PREDICTED: F-box protein At1g70590-like [Malus domestica]
MD10G1046000	26.8792	22.9336	20.9228	9.75547	11.2207	9.26727	17.7637	17.2372	19.2919	7.37334	9.47318	9.4692	--	--	--	K13947|0|mdm:103455629|K13947 auxin efflux carrier family | (RefSeq) PIN1; probable auxin efflux carrier component 1c	--	--	Auxin efflux carrier component 1 OS=Arabidopsis thaliana OX=3702 GN=PIN1 PE=1 SV=1	U	Intracellular trafficking, secretion, and vesicular transport	PREDICTED: probable auxin efflux carrier component 1c [Malus domestica]
MD03G1273500	6.34173	14.9856	3.56712	9.67865	5.70748	8.00268	6.15554	4.39621	5.15842	6.29776	6.14588	4.81607	[GI]	--	Molecular Function: enzyme inhibitor activity (GO:0004857);; Cellular Component: cell wall (GO:0005618);; Molecular Function: pectinesterase activity (GO:0030599);; Biological Process: cell wall modification (GO:0042545);; Biological Process: negative regulation of catalytic activity (GO:0043086);; Molecular Function: aspartyl esterase activity (GO:0045330);; Biological Process: pectin catabolic …	--	--	--	Probable pectinesterase/pectinesterase inhibitor 34 OS=Arabidopsis thaliana OX=3702 GN=PME34 PE=2 SV=1	G	Carbohydrate transport and metabolism	PREDICTED: probable pectinesterase/pectinesterase inhibitor 34 [Malus domestica]
MD03G1205000	42.9925	33.936	48.811	9.20847	13.5527	9.3308	31.2623	37.7749	35.0305	5.60437	6.90262	6.47708	[H]	Coenzyme transport and metabolism	Biological Process: lignin biosynthetic process (GO:0009809);; Biological Process: methylation (GO:0032259);; Molecular Function: protein dimerization activity (GO:0046983);; Molecular Function: caffeate O-methyltransferase activity (GO:0047763);;	K13066|0|mdm:103439958|K13066 caffeic acid 3-O-methyltransferase [EC:2.1.1.68] | (RefSeq) caffeic acid 3-O-methyltransferase-like	[R]	General function prediction only	Caffeic acid 3-O-methyltransferase OS=Prunus dulcis OX=3755 GN=COMT1 PE=2 SV=1	S	Function unknown	PREDICTED: caffeic acid 3-O-methyltransferase-like [Malus domestica]
MD11G1290500	7.11757	16.9854	5.56253	8.78235	13.2268	10.4933	12.9817	13.9081	12.7265	6.2359	7.70792	8.95118	--	--	--	--	--	--	--	S	Function unknown	PREDICTED: uncharacterized protein LOC103445080 [Malus domestica]
MD07G1115600	13.7987	10.6476	11.1085	8.67611	8.30114	14.3537	11.8993	9.64316	8.45489	8.15662	7.92357	7.07379	[H]	Coenzyme transport and metabolism	Biological Process: isoprenoid biosynthetic process (GO:0008299);; Molecular Function: transferase activity (GO:0016740);;	K13789|0|mdm:103418313|K13789 geranylgeranyl diphosphate synthase, type II [EC:2.5.1.1 2.5.1.10 2.5.1.29] | (RefSeq) geranylgeranyl pyrophosphate synthase, chloroplastic-like	[H]	Coenzyme transport and metabolism	Geranylgeranyl pyrophosphate synthase, chloroplastic OS=Hevea brasiliensis OX=3981 GN=GGPS PE=1 SV=1	H	Coenzyme transport and metabolism	PREDICTED: geranylgeranyl pyrophosphate synthase, chloroplastic-like [Malus domestica]
MD00G1136300	13.8611	33.2132	14.4862	8.62125	0.315523	0.010326	13.668	13.0013	14.8317	0.000524	27.9364	10.3343	[K]	Transcription	--	--	--	--	TMV resistance protein N OS=Nicotiana glutinosa OX=35889 GN=N PE=1 SV=1	S	Function unknown	PREDICTED: TMV resistance protein N-like isoform X2 [Pyrus x bretschneideri]
MD15G1377600	14.6259	24.7036	10.9733	8.56061	1.01399	5.68983	14.1985	12.7844	9.43415	26.6364	21.0084	5.27454	--	--	--	--	[O]	Posttranslational modification, protein turnover, chaperones	E3 ubiquitin-protein ligase AIRP2 OS=Arabidopsis thaliana OX=3702 GN=AIRP2 PE=1 SV=1	S	Function unknown	PREDICTED: uncharacterized protein LOC103418839 isoform X1 [Malus domestica]
MD13G1040800	9.0967	5.52318	8.01951	8.41459	7.0804	7.29299	7.84631	7.63874	6.89658	7.08866	8.50527	5.55683	--	--	Cellular Component: plasma membrane (GO:0005886);; Molecular Function: kinase activity (GO:0016301);; Biological Process: root hair cell differentiation (GO:0048765);;	--	--	--	Probable LRR receptor-like serine/threonine-protein kinase At4g29180 OS=Arabidopsis thaliana OX=3702 GN=At4g29180 PE=2 SV=2	T	Signal transduction mechanisms	Mitogen-activated protein kinase kinase kinase [Trema orientalis]
MD17G1275400	17.4805	14.2955	13.7129	8.33624	7.94648	6.83244	18.5737	11.4906	9.76751	7.09783	10.3689	9.73458	--	--	Cellular Component: integral component of membrane (GO:0016021);;	K13519|0|pxb:103954096|K13519 lysophospholipid acyltransferase [EC:2.3.1.51 2.3.1.23 2.3.1.-] | (RefSeq) lysophospholipid acyltransferase 1-like	[S]	Function unknown	Lysophospholipid acyltransferase 1 OS=Arabidopsis thaliana OX=3702 GN=LPLAT1 PE=1 SV=1	I	Lipid transport and metabolism	PREDICTED: lysophospholipid acyltransferase 1-like [Pyrus x bretschneideri]
MD13G1166300	21.6375	11.6596	19.6944	7.55652	8.09537	6.22694	24.1315	24.3282	22.0083	5.46695	8.16859	10.1686	--	--	--	K11982|2.04866e-151|mdm:103405455|K11982 E3 ubiquitin-protein ligase RNF115/126 [EC:2.3.2.27] | (RefSeq) probable E3 ubiquitin-protein ligase RHC1A	[O]	Posttranslational modification, protein turnover, chaperones	Probable E3 ubiquitin-protein ligase RHC1A OS=Arabidopsis thaliana OX=3702 GN=RHC1A PE=2 SV=1	O	Posttranslational modification, protein turnover, chaperones	PREDICTED: probable E3 ubiquitin-protein ligase RHC1A isoform X2 [Malus domestica]
MD14G1203600	14.6273	14.4238	16.8421	6.97374	9.21148	6.26611	10.4648	12.4163	17.5969	1.24955	3.13767	5.00497	--	--	Cellular Component: chloroplast (GO:0009507);; Biological Process: photosynthesis, light harvesting (GO:0009765);; Cellular Component: membrane (GO:0016020);; Molecular Function: metal ion binding (GO:0046872);;	K08913|2.88915e-178|mdm:103405001|K08913 light-harvesting complex II chlorophyll a/b binding protein 2 | (RefSeq) chlorophyll a-b binding protein 151, chloroplastic-like	--	--	Chlorophyll a-b binding protein 151, chloroplastic OS=Gossypium hirsutum OX=3635 GN=CAB-151 PE=2 SV=2	J	Translation, ribosomal structure and biogenesis	PREDICTED: chlorophyll a-b binding protein 151, chloroplastic-like [Malus domestica]
MD14G1070700	9.73738	8.49918	6.42234	6.83007	9.07919	7.38577	11.5064	4.64381	6.29875	6.9344	5.77453	3.11843	--	--	--	--	--	--	--	S	Function unknown	PREDICTED: uncharacterized protein LOC103403519 [Malus domestica]
MD12G1204600	0	5.4057	25.4888	6.75631	10.87	3.34675	55.5383	18.8137	0	10.8784	9.76079	8.07518	[J]	Translation, ribosomal structure and biogenesis	--	K13210|0|pxb:103967991|K13210 far upstream element-binding protein | (RefSeq) far upstream element-binding protein 2-like	[A]	RNA processing and modification	Protein BTR1 OS=Arabidopsis thaliana OX=3702 GN=BTR1 PE=1 SV=1	S	Function unknown	PREDICTED: far upstream element-binding protein 2-like isoform X1 [Pyrus x bretschneideri]
MD12G1165800	1.19849	0.141665	2.07168	4.18795	13.8875	5.31762	4.06912	4.36562	1.89618	0.435709	3.12567	1.44643	[P]	Inorganic ion transport and metabolism	Biological Process: calcium ion transport (GO:0006816);; Molecular Function: calcium:proton antiporter activity (GO:0015369);; Cellular Component: integral component of membrane (GO:0016021);; Biological Process: transmembrane transport (GO:0055085);;	K07300|0|mdm:103450620|K07300 Ca2+:H+ antiporter | (RefSeq) vacuolar cation/proton exchanger 3-like	[P]	Inorganic ion transport and metabolism	Vacuolar cation/proton exchanger 3 OS=Arabidopsis thaliana OX=3702 GN=CAX3 PE=1 SV=1	P	Inorganic ion transport and metabolism	PREDICTED: vacuolar cation/proton exchanger 3-like [Malus domestica]
MD06G1073000	16.1489	12.1833	17.5683	6.56065	6.1165	7.65297	16.6638	17.0421	15.5192	7.89277	8.32294	9.10945	[GR]	--	Molecular Function: riboflavin kinase activity (GO:0008531);; Biological Process: riboflavin biosynthetic process (GO:0009231);; Molecular Function: hydrolase activity (GO:0016787);;	K20884|0|mdm:103429479|K20884 riboflavin kinase / FMN hydrolase [EC:2.7.1.26 3.1.3.102] | (RefSeq) bifunctional riboflavin kinase/FMN phosphatase-like	[H]	Coenzyme transport and metabolism	Bifunctional riboflavin kinase/FMN phosphatase OS=Arabidopsis thaliana OX=3702 GN=FHY PE=1 SV=1	S	Function unknown	PREDICTED: bifunctional riboflavin kinase/FMN phosphatase-like [Malus domestica]
MD16G1248400	0.227938	0.234899	0.490857	6.01924	8.00023	3.52211	0.696999	0.324217	0.535608	1.64753	4.67518	11.4145	--	--	--	--	--	--	WRKY transcription factor 6 OS=Arabidopsis thaliana OX=3702 GN=WRKY6 PE=1 SV=1	K	Transcription	PREDICTED: probable WRKY transcription factor 31 [Malus domestica]
MD08G1243000	0.468247	0.596194	0.38683	5.8923	5.95238	10.4019	0.13899	0.201306	0.941881	7.942	8.17508	7.00385	--	--	--	--	[TZ]	--	Formin-like protein 1 OS=Oryza sativa subsp. japonica OX=39947 GN=FH1 PE=2 SV=1	U	Intracellular trafficking, secretion, and vesicular transport	PREDICTED: formin-like protein 2 [Pyrus x bretschneideri]
MD13G1102600	12.1784	7.2175	10.9206	5.09917	8.3041	5.75509	19.1089	21.8971	17.8709	5.27797	9.35199	7.68027	[R]	General function prediction only	Molecular Function: GTP binding (GO:0005525);; Cellular Component: endoplasmic reticulum (GO:0005783);; Cellular Component: Golgi apparatus (GO:0005794);; Biological Process: intracellular protein transport (GO:0006886);; Biological Process: vesicle-mediated transport (GO:0016192);;	K07953|6.20222e-113|mdm:103449219|K07953 GTP-binding protein SAR1 [EC:3.6.5.-] | (RefSeq) GTP-binding protein SAR1B	[U]	Intracellular trafficking, secretion, and vesicular transport	GTP-binding protein SAR1A OS=Arabidopsis thaliana OX=3702 GN=SAR1A PE=2 SV=1	U	Intracellular trafficking, secretion, and vesicular transport	PREDICTED: GTP-binding protein SAR1B [Malus domestica]
MD13G1148200	2.85254	8.70879	4.56409	5.02851	2.74021	7.71798	6.53353	6.26205	3.08349	14.5673	11.8142	5.57595	--	--	--	--	[K]	Transcription	--	K	Transcription	PREDICTED: uncharacterized protein LOC103408591 [Malus domestica]
MD17G1034300	5.4089	4.99177	3.60602	4.92261	5.84151	6.81336	2.65896	2.8738	2.57401	5.15869	4.72735	3.87744	[T]	Signal transduction mechanisms	--	--	[M]	Cell wall/membrane/envelope biogenesis	Probable E3 ubiquitin-protein ligase XBOS32 OS=Oryza sativa subsp. japonica OX=39947 GN=XBOS32 PE=2 SV=2	S	Function unknown	PREDICTED: tankyrase-2-like [Malus domestica]
MD14G1236300	25.0313	11.5761	20.0267	4.61522	2.32839	2.87599	10.6568	11.9163	11.7529	1.43143	2.94875	5.5229	--	--	--	--	[U]	Intracellular trafficking, secretion, and vesicular transport	Outer envelope pore protein 16-3, chloroplastic/mitochondrial OS=Arabidopsis thaliana OX=3702 GN=OEP163 PE=1 SV=1	O	Posttranslational modification, protein turnover, chaperones	PREDICTED: outer envelope pore protein 16-3, chloroplastic/mitochondrial-like [Malus domestica]
MD07G1302200	5.29289	4.79284	3.40412	4.47608	4.01916	5.92818	2.94984	3.70923	4.11052	4.93329	6.37113	6.56994	--	--	--	--	[O]	Posttranslational modification, protein turnover, chaperones	Ubiquitin carboxyl-terminal hydrolase 12 OS=Arabidopsis thaliana OX=3702 GN=UBP12 PE=1 SV=2	O	Posttranslational modification, protein turnover, chaperones	PREDICTED: MATH domain and coiled-coil domain-containing protein At3g58270-like [Malus domestica]
MD08G1030900	14.5455	14.3962	10.922	4.3123	3.53072	4.70569	15.469	13.2614	12.8159	4.49711	3.763	3.5078	--	--	--	--	[R]	General function prediction only	--	S	Function unknown	PREDICTED: putative lipase YOR059C [Malus domestica]
MD06G1149700	7.7234	15.5006	12.3844	4.30597	11.9061	5.32556	6.93585	6.97142	11.4795	1.95822	3.73631	4.18388	--	--	--	--	--	--	GLABRA2 expression modulator OS=Arabidopsis thaliana OX=3702 GN=GEM PE=1 SV=1	S	Function unknown	PREDICTED: GLABRA2 expression modulator-like isoform X1 [Malus domestica]
MD15G1151300	2.22098	0.678221	1.83202	4.20704	6.4929	4.39263	3.27466	1.61254	1.23929	2.57039	3.8995	3.53244	--	--	--	K14332|6.48467e-97|mdm:103424798|K14332 photosystem I subunit PsaO | (RefSeq) photosystem I subunit O	--	--	Photosystem I subunit O OS=Arabidopsis thaliana OX=3702 GN=PSAO PE=1 SV=1	S	Function unknown	PREDICTED: photosystem I subunit O isoform X2 [Malus domestica]
MD01G1161200	6.14365	5.64896	6.07747	4.16365	3.40569	4.18201	6.57975	6.20981	4.3191	4.78452	5.32567	2.72172	--	--	Molecular Function: structural molecule activity (GO:0005198);;	--	[U]	Intracellular trafficking, secretion, and vesicular transport	Vesicle-associated protein 1-2 OS=Arabidopsis thaliana OX=3702 GN=PVA12 PE=1 SV=1	U	Intracellular trafficking, secretion, and vesicular transport	PREDICTED: vesicle-associated protein 1-2 [Malus domestica]
MD01G1107500	14.1851	7.80109	16.6059	4.10453	1.49435	3.07587	18.4534	17.4253	9.30874	1.84547	3.3868	1.9162	--	--	--	K12160|2.48817e-67|pxb:103951409|K12160 small ubiquitin-related modifier | (RefSeq) small ubiquitin-related modifier 1	[O]	Posttranslational modification, protein turnover, chaperones	Small ubiquitin-related modifier 2 OS=Arabidopsis thaliana OX=3702 GN=SUMO2 PE=1 SV=1	O	Posttranslational modification, protein turnover, chaperones	PREDICTED: small ubiquitin-related modifier 1 [Malus domestica]
MD02G1255000	7.13791	8.16996	10.2065	3.88753	6.08924	4.88115	8.98114	8.55273	8.23992	3.62311	4.44764	5.37871	--	--	--	--	--	--	--	S	Function unknown	PREDICTED: uncharacterized protein LOC103441150 [Malus domestica]
MD14G1141600	0.544611	0.219943	1.69966	3.85517	2.26889	3.34898	0.73355	1.41799	0.524266	3.26018	4.41351	7.49386	--	--	Biological Process: rRNA processing (GO:0006364);; Cellular Component: chloroplast thylakoid membrane (GO:0009535);; Cellular Component: photosystem I reaction center (GO:0009538);; Biological Process: plastid organization (GO:0009657);; Cellular Component: chloroplast envelope (GO:0009941);; Biological Process: photosystem II assembly (GO:0010207);; Cellular Component: plastoglobule (GO:0010287)…	K02699|3.76955e-135|mdm:103419531|K02699 photosystem I subunit XI | (RefSeq) photosystem I reaction center subunit XI, chloroplastic-like	--	--	Photosystem I reaction center subunit XI, chloroplastic OS=Arabidopsis thaliana OX=3702 GN=PSAL PE=1 SV=2	C	Energy production and conversion	PREDICTED: photosystem I reaction center subunit XI, chloroplastic-like [Malus domestica]
MD03G1277600	0.74528	0.499071	0.273705	3.82784	5.84347	3.65889	0.367091	0.226663	0.273571	3.83492	3.56765	4.30112	--	--	--	K16189|0|mdm:103405139|K16189 phytochrome-interacting factor 4 | (RefSeq) transcription factor PIF4-like	--	--	Transcription factor PIF5 OS=Arabidopsis thaliana OX=3702 GN=PIF5 PE=1 SV=1	K	Transcription	PREDICTED: transcription factor PIF4-like [Malus domestica]
MD07G1051300	6.65916	21.067	8.16646	3.49849	8.67468	4.25025	7.76346	5.90817	5.0222	3.39022	5.50851	7.72946	--	--	--	--	--	--	--	--	--	PREDICTED: classical arabinogalactan protein 4-like [Malus domestica]
MD11G1151400	0.573909	0.396877	0.494447	3.36706	2.46765	2.53892	0.2312	0.052433	0.814061	2.33492	4.82857	5.2515	--	--	Molecular Function: heat shock protein binding (GO:0031072);; Molecular Function: unfolded protein binding (GO:0051082);;	--	--	--	Protein SPA, chloroplastic OS=Solanum lycopersicum OX=4081 GN=SPA PE=2 SV=1	S	Function unknown	PREDICTED: protein SPA, chloroplastic [Malus domestica]
MD12G1201600	7.28813	1.47161	6.45554	3.29804	4.25241	3.56208	6.59226	1.83258	1.45555	2.33443	4.36258	3.33618	--	--	--	--	[S]	Function unknown	UNC93-like protein 2 OS=Arabidopsis thaliana OX=3702 GN=At1g18010 PE=2 SV=2	S	Function unknown	PREDICTED: UNC93-like protein 1 [Malus domestica]
MD14G1186300	3.75783	2.85493	2.87599	3.13035	1.54767	1.14929	1.65241	3.66897	2.89657	0.174267	1.34192	2.15805	--	--	--	K10523|0|pxb:103947551|K10523 speckle-type POZ protein | (RefSeq) BTB/POZ and MATH domain-containing protein 2-like	[DR]	--	BTB/POZ and MATH domain-containing protein 2 OS=Arabidopsis thaliana OX=3702 GN=BPM2 PE=1 SV=1	S	Function unknown	PREDICTED: BTB/POZ and MATH domain-containing protein 2-like isoform X1 [Pyrus x bretschneideri]
MD16G1167200	5.32061	4.80153	5.15318	3.0646	4.15271	3.89733	7.70242	4.48403	4.18248	2.24745	3.26636	3.06063	[O]	Posttranslational modification, protein turnover, chaperones	Molecular Function: transferase activity (GO:0016740);;	K00799|4.20486e-132|pmum:103319593|K00799 glutathione S-transferase [EC:2.5.1.18] | (RefSeq) glutathione transferase GST 23-like	[O]	Posttranslational modification, protein turnover, chaperones	Glutathione transferase GST 23 OS=Zea mays OX=4577 PE=2 SV=1	O	Posttranslational modification, protein turnover, chaperones	glutathione transferase GST 23-like [Prunus avium]
MD09G1214900	5.99299	6.15018	6.71527	2.86838	3.09708	3.06553	4.95321	4.23763	3.2485	2.79066	2.68422	2.44727	[R]	General function prediction only	--	K18801|3.36692e-180|mdm:103431726|K18801 glucuronoxylan 4-O-methyltransferase [EC:2.1.1.112] | (RefSeq) glucuronoxylan 4-O-methyltransferase 3-like	--	--	Glucuronoxylan 4-O-methyltransferase 3 OS=Arabidopsis thaliana OX=3702 GN=GXM3 PE=1 SV=1	S	Function unknown	PREDICTED: glucuronoxylan 4-O-methyltransferase 3-like [Malus domestica]
MD05G1020200	7.39567	6.51595	6.51253	2.7235	3.07881	3.91513	6.10554	3.77042	5.70518	3.75645	3.31925	3.18144	--	--	Molecular Function: binding (GO:0005488);;	--	--	--	Protein DCL, chloroplastic OS=Solanum lycopersicum OX=4081 GN=DCL PE=2 SV=1	S	Function unknown	PREDICTED: protein DCL, chloroplastic [Malus domestica]
MD05G1165500	5.8983	1.96129	11.3991	2.44882	3.46843	2.7813	13.4198	16.3518	5.99851	3.57847	4.49535	3.71428	[G]	Carbohydrate transport and metabolism	--	K08145|0|mdm:103420941|K08145 MFS transporter, SP family, solute carrier family 2 (facilitated glucose transporter), member 8 | (RefSeq) sugar transporter ERD6-like 6	[R]	General function prediction only	Sugar transporter ERD6-like 6 OS=Arabidopsis thaliana OX=3702 GN=At1g75220 PE=1 SV=1	G	Carbohydrate transport and metabolism	PREDICTED: sugar transporter ERD6-like 6 [Malus domestica]
MD05G1192500	6.99543	4.64053	7.89235	2.42329	1.5798	2.53525	6.28313	4.88028	5.87876	2.68934	3.2848	2.37731	--	--	--	K13648|0|mdm:103405701|K13648 alpha-1,4-galacturonosyltransferase [EC:2.4.1.43] | (RefSeq) polygalacturonate 4-alpha-galacturonosyltransferase	--	--	Polygalacturonate 4-alpha-galacturonosyltransferase OS=Arabidopsis thaliana OX=3702 GN=GAUT1 PE=1 SV=1	M	Cell wall/membrane/envelope biogenesis	PREDICTED: polygalacturonate 4-alpha-galacturonosyltransferase [Malus domestica]
MD03G1164600	3.7992	2.91868	5.15936	2.3305	4.45758	3.13403	6.50495	5.72493	5.2764	1.28477	1.89524	3.95129	[O]	Posttranslational modification, protein turnover, chaperones	--	K16290|0|mdm:103412131|K16290 xylem cysteine proteinase [EC:3.4.22.-] | (RefSeq) cysteine protease XCP1-like	[O]	Posttranslational modification, protein turnover, chaperones	Cysteine protease XCP1 OS=Arabidopsis thaliana OX=3702 GN=XCP1 PE=1 SV=1	O	Posttranslational modification, protein turnover, chaperones	PREDICTED: cysteine protease XCP1-like [Malus domestica]
MD10G1233600	4.49795	3.54876	6.66189	2.21569	2.00066	1.78461	6.39721	6.637	8.69934	1.83626	2.62599	3.54512	[J]	Translation, ribosomal structure and biogenesis	Molecular Function: translation elongation factor activity (GO:0003746);; Molecular Function: GTPase activity (GO:0003924);; Molecular Function: GTP binding (GO:0005525);; Cellular Component: intracellular (GO:0005622);; Biological Process: obsolete GTP catabolic process (GO:0006184);; Biological Process: translational elongation (GO:0006414);;	K02355|0|mdm:103433085|K02355 elongation factor G | (RefSeq) elongation factor G-2, chloroplastic	[J]	Translation, ribosomal structure and biogenesis	Elongation factor G-2, chloroplastic OS=Glycine max OX=3847 GN=fusA2 PE=3 SV=1	J	Translation, ribosomal structure and biogenesis	PREDICTED: elongation factor G-2, chloroplastic [Malus domestica]
MD16G1089700	2.40622	2.04651	3.30251	2.15581	2.50747	2.02392	1.14686	1.91751	2.24029	1.50456	2.04279	1.55114	[E]	Amino acid transport and metabolism	Molecular Function: transporter activity (GO:0005215);; Biological Process: oligopeptide transport (GO:0006857);; Cellular Component: integral component of membrane (GO:0016021);;	--	[E]	Amino acid transport and metabolism	Protein NRT1/ PTR FAMILY 6.3 OS=Arabidopsis thaliana OX=3702 GN=NPF6.3 PE=1 SV=1	E	Amino acid transport and metabolism	PREDICTED: LOW QUALITY PROTEIN: protein NRT1/ PTR FAMILY 6.3-like [Malus domestica]
MD00G1101700	3.58888	2.82432	3.23901	2.15274	2.75242	1.7312	3.90395	2.922	2.94601	1.94197	1.09571	1.4993	--	--	--	--	[D]	Cell cycle control, cell division, chromosome partitioning	--	L	Replication, recombination and repair	PREDICTED: uncharacterized protein LOC103430676 isoform X2 [Malus domestica]
MD10G1072000	14.0681	10.0351	13.4686	2.04439	3.64661	4.39396	11.8192	10.056	14.0646	2.84841	4.44405	5.09031	[F]	Nucleotide transport and metabolism	Molecular Function: adenylate kinase activity (GO:0004017);; Molecular Function: copper ion binding (GO:0005507);; Molecular Function: ATP binding (GO:0005524);; Cellular Component: mitochondrion (GO:0005739);; Cellular Component: plasma membrane (GO:0005886);; Biological Process: purine nucleotide metabolic process (GO:0006163);; Biological Process: response to cadmium ion (GO:0046686);; Biologi…	K00939|0|mdm:103431108|K00939 adenylate kinase [EC:2.7.4.3] | (RefSeq) adenylate kinase 4	[F]	Nucleotide transport and metabolism	Adenylate kinase 4 OS=Oryza sativa subsp. japonica OX=39947 GN=ADK-B PE=2 SV=1	F	Nucleotide transport and metabolism	PREDICTED: adenylate kinase 4-like [Malus domestica]
MD03G1071600	11.2969	8.64943	11.7499	2.0381	2.35042	2.04197	16.106	12.3249	12.4173	1.28914	1.19509	1.13905	--	--	Biological Process: glucuronoxylan metabolic process (GO:0010413);; Biological Process: xylan biosynthetic process (GO:0045492);; Biological Process: response to other organism (GO:0051707);;	--	--	--	Thaumatin-like protein OS=Arabidopsis thaliana OX=3702 GN=At1g18250 PE=2 SV=2	S	Function unknown	PREDICTED: thaumatin-like protein [Malus domestica]
MD10G1239600	9.47011	8.82089	9.04658	2.0232	3.2404	3.60758	9.88618	12.3525	9.39393	3.04363	4.4183	3.24153	[I]	Lipid transport and metabolism	Molecular Function: iron ion binding (GO:0005506);; Biological Process: fatty acid biosynthetic process (GO:0006633);; Cellular Component: integral component of membrane (GO:0016021);; Molecular Function: oxidoreductase activity (GO:0016491);; Biological Process: oxidation-reduction process (GO:0055114);;	K15746|0|mdm:103406562|K15746 beta-carotene 3-hydroxylase [EC:1.14.13.129] | (RefSeq) beta-carotene hydroxylase 2, chloroplastic-like	--	--	Beta-carotene hydroxylase 2, chloroplastic (Fragment) OS=Capsicum annuum OX=4072 GN=CA2 PE=2 SV=1	S	Function unknown	PREDICTED: beta-carotene hydroxylase 2, chloroplastic-like [Malus domestica]
MD01G1032700	12.9118	18.0229	8.47162	1.87141	0.526958	1.75201	4.91786	4.23496	5.7768	4.59465	2.58898	2.49561	[E]	Amino acid transport and metabolism	--	K08776|0|pxb:103927510|K08776 puromycin-sensitive aminopeptidase [EC:3.4.11.-] | (RefSeq) aminopeptidase M1-like	[EO]	--	Aminopeptidase M1 OS=Arabidopsis thaliana OX=3702 GN=APM1 PE=1 SV=1	E	Amino acid transport and metabolism	PREDICTED: aminopeptidase M1-like [Pyrus x bretschneideri]
MD16G1171400	4.70482	1.77438	4.86601	1.78578	2.77995	2.04911	3.97432	5.59704	6.61941	1.85586	2.3838	3.37083	--	--	Molecular Function: Rho GDP-dissociation inhibitor activity (GO:0005094);; Cellular Component: cytoplasm (GO:0005737);;	K12462|1.34551e-154|mdm:103419930|K12462 Rho GDP-dissociation inhibitor | (RefSeq) rho GDP-dissociation inhibitor 1-like	[T]	Signal transduction mechanisms	Rho GDP-dissociation inhibitor 1 OS=Arabidopsis thaliana OX=3702 GN=GDI1 PE=1 SV=1	O	Posttranslational modification, protein turnover, chaperones	PREDICTED: rho GDP-dissociation inhibitor 1-like [Malus domestica]
MD16G1160400	2.62138	5.83832	0.193399	1.40658	5.9635	12.8052	5.68066	5.79946	7.03606	10.8719	5.18767	2.25948	--	--	Molecular Function: binding (GO:0005488);; Biological Process: response to hormone (GO:0009725);; Biological Process: response to oxygen-containing compound (GO:1901700);;	K09422|0|mdm:103452656|K09422 myb proto-oncogene protein, plant | (RefSeq) transcription factor MYB108-like	[K]	Transcription	Transcription factor MYB108 OS=Arabidopsis thaliana OX=3702 GN=MYB108 PE=1 SV=1	K	Transcription	PREDICTED: transcription factor MYB108-like [Malus domestica]
MD04G1149700	0.739387	0.412501	0	1.39457	3.04391	1.49644	1.31621	2.07687	0.381975	0.852846	1.82902	1.68699	--	--	--	--	--	--	Dof zinc finger protein DOF1.2 OS=Arabidopsis thaliana OX=3702 GN=DOF1.2 PE=2 SV=1	S	Function unknown	PREDICTED: dof zinc finger protein DOF3.5 [Malus domestica]
MD08G1049400	30.3195	15.9406	23.8351	1.27804	2.18394	2.15286	14.0601	15.439	28.6276	1.22205	0.92025	1.54699	--	--	--	--	--	--	--	--	--	PREDICTED: uncharacterized protein LOC103423804 [Malus domestica]
MD02G1107500	2.00601	2.28713	2.31317	1.22454	2.00016	0.888561	2.48508	2.04524	2.55163	0.644997	1.19503	1.04476	--	--	--	--	--	--	Arabinogalactan protein 20 OS=Arabidopsis thaliana OX=3702 GN=AGP20 PE=1 SV=1	S	Function unknown	hypothetical protein PRUPE_7G215700 [Prunus persica]
MD00G1030400	1.16803	1.51032	1.6969	1.17838	0	1.70396	1.88662	0.630723	1.79743	1.03049	0.547658	0.67515	[C]	Energy production and conversion	Biological Process: ATP synthesis coupled proton transport (GO:0015986);; Cellular Component: proton-transporting ATP synthase complex, catalytic core F(1) (GO:0045261);; Molecular Function: proton-transporting ATP synthase activity, rotational mechanism (GO:0046933);; Molecular Function: proton-transporting ATPase activity, rotational mechanism (GO:0046961);;	K02115|0|mdm:103446721|K02115 F-type H+-transporting ATPase subunit gamma | (RefSeq) ATP synthase gamma chain, chloroplastic	[C]	Energy production and conversion	ATP synthase gamma chain, chloroplastic OS=Nicotiana tabacum OX=4097 GN=ATPC PE=1 SV=1	C	Energy production and conversion	PREDICTED: ATP synthase gamma chain, chloroplastic [Malus domestica]
MD09G1241900	8.70869	17.4242	3.21578	1.12985	1.81044	0.277512	0.707812	0.636449	28.1618	1.10395	4.13591	7.78179	--	--	Molecular Function: galactoside 2-alpha-L-fucosyltransferase activity (GO:0008107);; Cellular Component: membrane (GO:0016020);; Biological Process: fucosylation (GO:0036065);; Biological Process: cell wall biogenesis (GO:0042546);;	K13681|0|mdm:103455371|K13681 xyloglucan fucosyltransferase [EC:2.4.1.-] | (RefSeq) galactoside 2-alpha-L-fucosyltransferase-like	--	--	Galactoside 2-alpha-L-fucosyltransferase OS=Pisum sativum OX=3888 GN=FT1 PE=2 SV=1	O	Posttranslational modification, protein turnover, chaperones	PREDICTED: galactoside 2-alpha-L-fucosyltransferase-like [Malus domestica]
MD11G1242400	5.77546	12.7198	2.94786	1.05818	8.93936	2.53895	1.92827	2.96837	9.2654	0.289472	0.571785	3.64748	--	--	--	--	[S]	Function unknown	Probable magnesium transporter NIPA8 OS=Arabidopsis thaliana OX=3702 GN=At3g26670 PE=2 SV=1	S	Function unknown	PREDICTED: probable magnesium transporter NIPA8 [Malus domestica]
MD05G1300300	1.71867	0.914526	1.33462	0.98853	1.279	2.11423	1.71032	0.686315	1.2997	1.21874	1.4872	1.04834	[M]	Cell wall/membrane/envelope biogenesis	--	K04733|0|pmum:103324572|K04733 interleukin-1 receptor-associated kinase 4 [EC:2.7.11.1] | (RefSeq) cysteine-rich receptor-like protein kinase 29	--	--	Cysteine-rich receptor-like protein kinase 8 OS=Arabidopsis thaliana OX=3702 GN=CRK8 PE=3 SV=2	T	Signal transduction mechanisms	PREDICTED: putative receptor-like protein kinase At4g00960 isoform X3 [Pyrus x bretschneideri]
MD03G1052300	3.28206	3.29467	4.321	0.890586	1.43351	1.45046	3.2321	3.08693	3.37107	0.6817	0.838515	0.914824	[H]	Coenzyme transport and metabolism	Molecular Function: pantothenate kinase activity (GO:0004594);; Molecular Function: ATP binding (GO:0005524);; Biological Process: coenzyme A biosynthetic process (GO:0015937);; Biological Process: phosphorylation (GO:0016310);;	K09680|0|mdm:103451979|K09680 type II pantothenate kinase [EC:2.7.1.33] | (RefSeq) pantothenate kinase 1	[H]	Coenzyme transport and metabolism	Pantothenate kinase 1 OS=Arabidopsis thaliana OX=3702 GN=PANK1 PE=2 SV=2	H	Coenzyme transport and metabolism	PREDICTED: LOW QUALITY PROTEIN: pantothenate kinase 1 [Malus domestica]
MD08G1224000	10.4469	7.18081	10.9183	0.868883	2.20447	2.11467	9.21972	11.7005	11.9605	1.18097	1.37109	1.37542	--	--	--	--	--	--	--	S	Function unknown	PREDICTED: uncharacterized protein LOC103962421 [Pyrus x bretschneideri]
MD08G1229600	2.27351	3.20087	2.76788	0.814119	0.285169	0.715298	1.31317	1.30549	1.78036	0.279662	0.862105	0.867177	--	--	Molecular Function: DNA binding (GO:0003677);; Molecular Function: chromatin binding (GO:0003682);; Molecular Function: zinc ion binding (GO:0008270);; Biological Process: response to abiotic stimulus (GO:0009628);; Biological Process: response to hormone (GO:0009725);; Biological Process: response to lipid (GO:0033993);; Biological Process: response to oxygen-containing compound (GO:1901700);;	--	--	--	Transcription factor KUA1 OS=Arabidopsis thaliana OX=3702 GN=KUA1 PE=1 SV=1	K	Transcription	PREDICTED: transcription factor MYB1R1 [Malus domestica]
MD11G1315700	29.7421	22.2354	33.344	0.605441	0.845905	20.7195	29.2037	33.1721	32.8911	13.6544	0.694506	0.948194	--	--	--	--	--	--	--	--	--	PREDICTED: non-specific lipid-transfer protein-like protein At2g13820 isoform X2 [Malus domestica]
MD09G1147100	0.049545	0.087965	0.059824	0.595231	0.118128	0.28898	0.056692	0.041862	0.231441	0.525899	0.752026	0.633715	--	--	Biological Process: cytokinesis (GO:0000910);; Molecular Function: SNAP receptor activity (GO:0005484);; Cellular Component: plasma membrane (GO:0005886);; Biological Process: membrane fusion (GO:0006944);; Molecular Function: protein transporter activity (GO:0008565);; Cellular Component: cell plate (GO:0009504);; Biological Process: protein transport (GO:0015031);; Biological Process: vesicle-m…	K08494|3.38521e-171|pxb:103966888|K08494 novel plant SNARE | (RefSeq) novel plant SNARE 11-like	--	--	Novel plant SNARE 11 OS=Arabidopsis thaliana OX=3702 GN=NPSN11 PE=1 SV=2	U	Intracellular trafficking, secretion, and vesicular transport	PREDICTED: novel plant SNARE 11-like [Malus domestica]
MD13G1177000	23.789	21.9174	21.9277	0.509654	2.27451	0.745233	13.3723	13.6565	31.1741	0.017194	0.492689	0.481582	--	--	--	--	--	--	Protein DMP2 OS=Arabidopsis thaliana OX=3702 GN=DMP2 PE=2 SV=1	S	Function unknown	PREDICTED: uncharacterized protein LOC103453018 [Malus domestica]
MD02G1003800	0.760522	1.34864	1.73126	0.491395	0.445291	0.639783	0.372861	1.29061	2.54056	0.873091	1.2813	1.49455	[C]	Energy production and conversion	--	K00128|0|mdm:103451955|K00128 aldehyde dehydrogenase (NAD+) [EC:1.2.1.3] | (RefSeq) aldehyde dehydrogenase family 2 member B7, mitochondrial-like	[C]	Energy production and conversion	Aldehyde dehydrogenase family 2 member B7, mitochondrial OS=Arabidopsis thaliana OX=3702 GN=ALDH2B7 PE=1 SV=2	C	Energy production and conversion	PREDICTED: aldehyde dehydrogenase family 2 member B7, mitochondrial-like [Malus domestica]
MD02G1112600	1.38715	0.355966	2.5073	0.48703	0.124174	0.416971	4.60176	1.56677	0.858051	0.29347	0.217751	0.10489	--	--	Cellular Component: integral component of membrane (GO:0016021);;	--	[E]	Amino acid transport and metabolism	Amino acid transporter AVT6C OS=Arabidopsis thaliana OX=3702 GN=AVT6C PE=2 SV=1	E	Amino acid transport and metabolism	PREDICTED: LOW QUALITY PROTEIN: sodium-coupled neutral amino acid transporter 3-like [Malus domestica]
MD06G1181200	1.09356	1.31967	0.550852	0.46748	0	0.351933	0.872881	0.53168	1.22898	0	1.28909	0.877946	--	--	--	--	--	--	F-box protein At2g32560 OS=Arabidopsis thaliana OX=3702 GN=At2g32560 PE=2 SV=1	S	Function unknown	PREDICTED: F-box protein At2g26850-like [Pyrus x bretschneideri]
MD07G1300900	44.4177	59.5916	37.5959	0.460343	0.789038	0.099027	66.8187	48.5146	84.6182	0.073072	0.535823	0.256033	[O]	Posttranslational modification, protein turnover, chaperones	--	--	[O]	Posttranslational modification, protein turnover, chaperones	Oryzain alpha chain OS=Oryza sativa subsp. japonica OX=39947 GN=Os04g0650000 PE=1 SV=2	O	Posttranslational modification, protein turnover, chaperones	PREDICTED: low-temperature-induced cysteine proteinase-like [Malus domestica]
MD05G1211600	0.373179	1.82373	0.403997	0.295226	0.438768	0.646337	0.510963	0.348399	0.310596	0.052157	0.224866	0.253354	[K]	Transcription	--	--	--	--	Protein SUPPRESSOR OF npr1-1, CONSTITUTIVE 1 OS=Arabidopsis thaliana OX=3702 GN=SNC1 PE=1 SV=5	S	Function unknown	PREDICTED: protein SUPPRESSOR OF npr1-1, CONSTITUTIVE 1-like [Pyrus x bretschneideri]
MD16G1088200	2.27418	1.75021	1.60202	0.240224	0	0.230835	1.02959	0.355214	1.44471	0.074942	0.449645	0.897004	--	--	--	--	--	--	Protein MLN51 homolog OS=Arabidopsis thaliana OX=3702 GN=MLN51 PE=1 SV=1	S	Function unknown	PREDICTED: uncharacterized protein LOC103436773 isoform X2 [Malus domestica]
MD05G1214000	0.819867	0.158428	0.68915	0.202713	0.453109	0.376362	0.932249	0.617804	0.77228	0.178434	0.262384	0.669396	--	--	--	--	--	--	--	S	Function unknown	PREDICTED: uncharacterized protein LOC103433702 [Malus domestica]
MD15G1311400	1.05456	1.53786	0.936795	0.144565	0.124862	0.126253	0.475613	0.914989	1.53804	0.014431	0.13646	0.161443	[Q]	Secondary metabolites biosynthesis, transport and catabolism	--	K15397|0|mdm:103427677|K15397 3-ketoacyl-CoA synthase [EC:2.3.1.199] | (RefSeq) 3-ketoacyl-CoA synthase 1-like	--	--	3-ketoacyl-CoA synthase 1 OS=Arabidopsis thaliana OX=3702 GN=KCS1 PE=1 SV=1	I	Lipid transport and metabolism	PREDICTED: 3-ketoacyl-CoA synthase 1-like [Malus domestica]
MD01G1026200	1.64461	2.47629	2.08137	0.087992	0.886883	0.902303	1.21384	1.35013	2.36434	0.2154	0.413566	1.07275	[DZ]	--	--	--	--	--	PH, RCC1 and FYVE domains-containing protein 1 OS=Arabidopsis thaliana OX=3702 GN=PRAF1 PE=1 SV=1	DZ	--	PREDICTED: uncharacterized protein LOC103402168 isoform X1 [Malus domestica]
MD03G1242900	0.462614	0.93187	0.091455	0.086991	0.158662	0.040555	0.050255	0.015182	1.36262	0.092284	0.171257	0.074426	--	--	Cellular Component: plasma membrane (GO:0005886);; Cellular Component: integral component of membrane (GO:0016021);;	--	--	--	CASP-like protein 5B3 OS=Arabidopsis thaliana OX=3702 GN=At3g23200 PE=2 SV=1	S	Function unknown	PREDICTED: CASP-like protein 5B3 isoform X1 [Malus domestica]
MD09G1048700	47.3109	25.9058	27.9027	0.068768	0.124259	0.173529	25.6686	25.2466	34.0148	0.211523	0.188167	0.021818	--	--	Cellular Component: chloroplast (GO:0009507);; Cellular Component: photosystem II (GO:0009523);; Biological Process: photosynthetic electron transport in photosystem II (GO:0009772);; Cellular Component: integral component of membrane (GO:0016021);; Molecular Function: electron transporter, transferring electrons within the cyclic electron transport pathway of photosynthesis activity (GO:0045156)…	K02706|2.47953e-63|crb:CARUB_v10001685mg|K02706 photosystem II P680 reaction center D2 protein [EC:1.10.3.9] | (RefSeq) hypothetical protein	--	--	Photosystem II D2 protein OS=Cucumis sativus OX=3659 GN=psbD PE=3 SV=1	C	Energy production and conversion	PsbD, partial (chloroplast) [Byrsonima crassifolia]
MD03G1067900	0.793578	1.0817	0.560988	0.049268	0.397739	0.069234	0.289037	1.22742	0.931749	0	0	0.344065	[L]	Replication, recombination and repair	--	K12119|0|mdm:103425741|K12119 cryptochrome 2 | (RefSeq) cryptochrome-1-like	[LT]	--	Cryptochrome-2 OS=Arabidopsis thaliana OX=3702 GN=CRY2 PE=1 SV=2	L	Replication, recombination and repair	PREDICTED: LOW QUALITY PROTEIN: cryptochrome-1-like [Malus domestica]
MD15G1419600	2.74916	1.88242	2.1922	0.045938	0	0.023137	2.19114	2.84051	2.04897	0.038942	0.080459	0.04285	[O]	Posttranslational modification, protein turnover, chaperones	--	--	--	--	Subtilisin-like protease SBT2.2 OS=Arabidopsis thaliana OX=3702 GN=SBT2.2 PE=3 SV=1	O	Posttranslational modification, protein turnover, chaperones	PREDICTED: subtilisin-like protease SBT2.2 isoform X1 [Malus domestica]
MD05G1317700	0	0.235313	0.116037	0.036422	0.002548	0.10411	0.161501	0.3038	0	0.096794	0.04813	0.047742	--	--	--	K08907|8.57113e-180|pper:PRUPE_ppa010511mg|K08907 light-harvesting complex I chlorophyll a/b binding protein 1 | (RefSeq) hypothetical protein	--	--	Chlorophyll a-b binding protein 6A, chloroplastic OS=Solanum lycopersicum OX=4081 GN=CAB6A PE=2 SV=1	O	Posttranslational modification, protein turnover, chaperones	chlorophyll a-b binding protein 6, chloroplastic [Prunus persica]
MD16G1217800	2.75519	1.90549	4.00748	0.022803	0	0	2.39175	3.09847	3.81824	0	0	0	--	--	Molecular Function: zinc ion binding (GO:0008270);;	--	[R]	General function prediction only	Zinc finger AN1 and C2H2 domain-containing stress-associated protein 11 OS=Arabidopsis thaliana OX=3702 GN=SAP11 PE=2 SV=1	S	Function unknown	PREDICTED: zinc finger AN1 and C2H2 domain-containing stress-associated protein 11-like [Pyrus x bretschneideri]
MD05G1317600	6.65373	5.77795	9.86195	0.009912	1.65355	0.004264	11.7062	8.79042	0.001726	1.32795	5.1e-05	0.124771	--	--	Molecular Function: peptide-N4-(N-acetyl-beta-glucosaminyl)asparagine amidase activity (GO:0000224);;	--	--	--	Peptide-N4-(N-acetyl-beta-glucosaminyl)asparagine amidase A OS=Prunus dulcis OX=3755 PE=1 SV=2	S	Function unknown	PREDICTED: peptide-N4-(N-acetyl-beta-glucosaminyl)asparagine amidase A-like [Malus domestica]
MD02G1070700	9.20226	4.79011	10.0114	0.008239	0.023981	0.059268	7.56714	8.93171	7.9078	0	0.022064	0.033822	--	--	--	K03109|5.95125e-72|mdm:103417112|K03109 signal recognition particle subunit SRP9 | (RefSeq) signal recognition particle 9 kDa protein	[U]	Intracellular trafficking, secretion, and vesicular transport	Signal recognition particle 9 kDa protein OS=Arabidopsis thaliana OX=3702 GN=SRP9 PE=3 SV=1	U	Intracellular trafficking, secretion, and vesicular transport	PREDICTED: signal recognition particle 9 kDa protein [Malus domestica]
MD14G1217300	0.534759	0.275725	0.073383	0	0.070986	0.062966	0	0.07631	1.47633	0	0.03999	0.305287	--	--	--	K08592|0|mdm:103425651|K08592 sentrin-specific protease 1 [EC:3.4.22.68] | (RefSeq) ubiquitin-like-specific protease ESD4	[O]	Posttranslational modification, protein turnover, chaperones	Ubiquitin-like-specific protease ESD4 OS=Arabidopsis thaliana OX=3702 GN=ESD4 PE=1 SV=1	O	Posttranslational modification, protein turnover, chaperones	PREDICTED: ubiquitin-like-specific protease ESD4 [Malus domestica]
MD15G1235000	0.160999	0.697492	0.103114	0	0	0	0	0	0.363374	0	0	0	[O]	Posttranslational modification, protein turnover, chaperones	Molecular Function: serine-type endopeptidase activity (GO:0004252);; Biological Process: proteolysis (GO:0006508);; Molecular Function: identical protein binding (GO:0042802);; Biological Process: negative regulation of catalytic activity (GO:0043086);;	--	--	--	Subtilisin-like protease SBT5.3 OS=Arabidopsis thaliana OX=3702 GN=AIR3 PE=2 SV=1	O	Posttranslational modification, protein turnover, chaperones	PREDICTED: subtilisin-like protease SBT5.4 [Malus domestica]
MD02G1200900	0.128066	0.291012	0.025594	0	0.155228	0	0	0.277739	0.570178	0	0	0.031413	--	--	Molecular Function: calcium ion binding (GO:0005509);; Molecular Function: calcium-dependent phospholipid binding (GO:0005544);;	K17099|0|pxb:103956236|K17099 annexin A13 | (RefSeq) annexin A13-like	[U]	Intracellular trafficking, secretion, and vesicular transport	Annexin D8 OS=Arabidopsis thaliana OX=3702 GN=ANNAT8 PE=2 SV=2	S	Function unknown	PREDICTED: annexin A13-like [Pyrus x bretschneideri]
MD07G1225400	0.306659	0.626548	0.301114	0	0.152819	0.079665	0.122685	0.299071	1.04508	0	0.024859	0.196808	[G]	Carbohydrate transport and metabolism	--	--	--	--	--	S	Function unknown	PREDICTED: uncharacterized protein LOC103402994 isoform X1 [Malus domestica]
MD05G1011500	0.786698	0	0	0	0.456464	0.294003	0.525931	0	0.147499	0	0	0.21273	--	--	--	--	--	--	Probable WRKY transcription factor 9 OS=Arabidopsis thaliana OX=3702 GN=WRKY9 PE=2 SV=1	K	Transcription	PREDICTED: probable WRKY transcription factor 9 [Pyrus x bretschneideri]
MD05G1323600	0	0.108376	0	0	0.109053	0	0.104888	0	0.123534	0.07484	0.286395	0.27345	--	--	--	--	--	--	--	S	Function unknown	PREDICTED: uncharacterized protein LOC103932017 [Pyrus x bretschneideri]
MD02G1080400	0.296576	0	0	0	0.607908	1.24437	0.125447	0	0.975058	0	0	0	[K]	Transcription	--	--	[R]	General function prediction only	Receptor-like protein EIX2 OS=Solanum lycopersicum OX=4081 GN=EIX2 PE=1 SV=2	S	Function unknown	PREDICTED: probable LRR receptor-like serine/threonine-protein kinase At4g36180 [Malus domestica]
MD06G1081100	0.544029	0.324452	0	0	0	0.030438	0	0.031852	0.242074	0	0.012822	0	--	--	--	--	--	--	--	--	--	PREDICTED: serine/threonine-protein phosphatase 7 long form homolog [Pyrus x bretschneideri]
MD04G1126400	0	0.228659	0.055181	0	0	0	0	0	0.666002	0.026857	0	0	[H]	Coenzyme transport and metabolism	--	K00278|0|mdm:103404573|K00278 L-aspartate oxidase [EC:1.4.3.16] | (RefSeq) L-aspartate oxidase, chloroplastic	[C]	Energy production and conversion	L-aspartate oxidase, chloroplastic OS=Arabidopsis thaliana OX=3702 GN=AO PE=1 SV=1	H	Coenzyme transport and metabolism	PREDICTED: L-aspartate oxidase, chloroplastic [Malus domestica]
MD14G1217700	0.882862	0.730674	1.08492	0	0	0	0.436969	0.420846	0	0	0	0	--	--	--	--	[S]	Function unknown	--	S	Function unknown	PREDICTED: uncharacterized protein LOC103409221 isoform X2 [Malus domestica]
MD12G1251400	0	0	0	0	0	0	0	0	0	0	0	0	[E]	Amino acid transport and metabolism	Biological Process: cellular process (GO:0009987);;	--	[E]	Amino acid transport and metabolism	FACT complex subunit SPT16 OS=Zea mays OX=4577 GN=SPT16 PE=2 SV=1	K	Transcription	PREDICTED: FACT complex subunit SPT16-like [Malus domestica]
MD02G1160700	0	0	0	0	0	0	0	0	8.56663	0	0	0	--	--	Biological Process: defense response (GO:0006952);; Biological Process: response to biotic stimulus (GO:0009607);;	--	--	--	Major allergen Pru ar 1 OS=Prunus armeniaca OX=36596 PE=1 SV=1	S	Function unknown	major allergen Mal d 1-like [Malus domestica]
Md/Mx root-to-leaf	Md/Mx +3 d r1	Md/Mx +3 d r2	Md/Mx +3 d r3	Md/Mx +3 d L1	Md/Mx +3 d L2	Md/Mx +3 d L3	Md/Mx -3 d r1	Md/Mx -3 d r2	Md/Mx -3 d r3	Md/Mx -3 d L1	Md/Mx -3 d L2	Md/Mx -3 d L3	COG_class	COG_class_annotation	GO_annotation	KEGG_annotation	KOG_class	KOG_class_annotation	Swissprot_annotation	eggNOG_class	eggNOG_class_annotation	nr_annotation
MD15G1416600	2.65311	6.49833	1.84477	92.1526	539.831	602.81	7.54079	4.06286	1.51794	26.5668	91.0915	814.902	--	--	Cellular Component: photosystem I (GO:0009522);; Biological Process: photosynthesis (GO:0015979);; Molecular Function: chlorophyll binding (GO:0016168);;	K08905|2.27758e-106|mdm:103417553|K08905 photosystem I subunit V | (RefSeq) photosystem I reaction center subunit V, chloroplastic	--	--	Photosystem I reaction center subunit V, chloroplastic OS=Arabidopsis thaliana OX=3702 GN=PSAG PE=1 SV=1	I	Lipid transport and metabolism	PREDICTED: photosystem I reaction center subunit V, chloroplastic [Malus domestica]
MD10G1154500	6.81776	15.588	381.241	71.8349	55.5181	77.6457	8.70371	8.45781	778.683	24.8387	60.4239	91.1844	[C]	Energy production and conversion	Molecular Function: iron ion binding (GO:0005506);; Molecular Function: electron carrier activity (GO:0009055);; Molecular Function: heme binding (GO:0020037);; Molecular Function: molybdenum ion binding (GO:0030151);; Biological Process: nitrate assimilation (GO:0042128);; Molecular Function: molybdopterin cofactor binding (GO:0043546);; Molecular Function: oxidoreductase activity, acting on oth…	K10534|0|mdm:103416192|K10534 nitrate reductase (NAD(P)H) [EC:1.7.1.1 1.7.1.2 1.7.1.3] | (RefSeq) nitrate reductase [NADH]-like	[C]	Energy production and conversion	Nitrate reductase [NADH] OS=Cucurbita maxima OX=3661 PE=2 SV=1	CI	--	nitrate reductase [Malus hupehensis]
MD08G1124400	89.0471	92.3169	15.0289	51.575	14.2534	9.53677	311.258	108.26	15.5214	107.204	46.2878	10.9725	[G]	Carbohydrate transport and metabolism	--	K12446|0|mdm:103441214|K12446 L-arabinokinase [EC:2.7.1.46] | (RefSeq) L-arabinokinase-like	[G]	Carbohydrate transport and metabolism	L-arabinokinase OS=Arabidopsis thaliana OX=3702 GN=ARA1 PE=1 SV=1	G	Carbohydrate transport and metabolism	PREDICTED: L-arabinokinase-like isoform X2 [Malus domestica]
MD15G1141900	85.1157	114.191	180.065	65.4104	66.8338	54.6042	67.8293	83.4342	169.732	57.7101	70.8414	60.7064	--	--	Molecular Function: Rab GDP-dissociation inhibitor activity (GO:0005093);; Biological Process: protein transport (GO:0015031);;	K17255|0|mdm:103456321|K17255 Rab GDP dissociation inhibitor | (RefSeq) guanosine nucleotide diphosphate dissociation inhibitor 2	[O]	Posttranslational modification, protein turnover, chaperones	Guanosine nucleotide diphosphate dissociation inhibitor 1 OS=Arabidopsis thaliana OX=3702 GN=GDI1 PE=1 SV=1	O	Posttranslational modification, protein turnover, chaperones	PREDICTED: guanosine nucleotide diphosphate dissociation inhibitor 2 [Malus domestica]
MD15G1199200	76.8393	31.0859	4.19203	14.7523	14.05	4.91758	208.508	85.0997	9.71797	61.9351	16.7997	10.0688	--	--	--	--	[K]	Transcription	--	S	Function unknown	PREDICTED: uncharacterized protein LOC103400734 [Malus domestica]
MD04G1225100	45.6183	40.9432	45.9029	26.1999	31.655	59.4315	87.3612	72.4882	36.0832	15.1254	18.1303	69.9415	--	--	Cellular Component: nucleus (GO:0005634);; Biological Process: regulation of transcription, DNA-templated (GO:0006355);; Biological Process: regulation of translation (GO:0006417);; Biological Process: response to light stimulus (GO:0009416);; Cellular Component: plastid (GO:0009536);; Biological Process: auxin-activated signaling pathway (GO:0009734);; Molecular Function: protein dimerization ac…	K14484|0|mdm:103434164|K14484 auxin-responsive protein IAA | (RefSeq) auxin-responsive protein IAA16	--	--	Auxin-responsive protein IAA16 OS=Arabidopsis thaliana OX=3702 GN=IAA16 PE=1 SV=1	K	Transcription	auxin-responsive protein IAA16 [Malus domestica]
MD15G1302900	71.5701	35.9486	45.3086	8.89485	9.71524	20.4223	61.1021	67.9134	64.125	3.80461	7.49647	20.1952	--	--	Molecular Function: transcription factor activity, sequence-specific DNA binding (GO:0003700);; Cellular Component: nucleus (GO:0005634);; Biological Process: regulation of transcription, DNA-templated (GO:0006355);; Molecular Function: sequence-specific DNA binding (GO:0043565);;	K09338|6.19463e-159|pxb:103945728|K09338 homeobox-leucine zipper protein | (RefSeq) homeobox-leucine zipper protein HAT22-like	[K]	Transcription	Homeobox-leucine zipper protein HAT22 OS=Arabidopsis thaliana OX=3702 GN=HAT22 PE=1 SV=1	K	Transcription	PREDICTED: homeobox-leucine zipper protein HAT22-like [Pyrus x bretschneideri]
MD09G1207400	76.4946	82.4606	57.4684	0.852372	12.4428	8.4575	61.1183	54.9208	50.396	0.641942	0.724246	8.42317	[G]	Carbohydrate transport and metabolism	Molecular Function: transporter activity (GO:0005215);; Biological Process: transport (GO:0006810);; Cellular Component: integral component of membrane (GO:0016021);;	K09873|5.38433e-145|mdm:103411652|K09873 aquaporin TIP | (RefSeq) aquaporin TIP2-1-like	[G]	Carbohydrate transport and metabolism	Aquaporin TIP2-1 OS=Arabidopsis thaliana OX=3702 GN=TIP2-1 PE=1 SV=2	G	Carbohydrate transport and metabolism	PREDICTED: aquaporin TIP2-1-like [Malus domestica]
MD14G1049000	85.3295	80.3201	20.3949	35.4891	53.9221	63.4435	88.9777	57.7239	13.0908	37.7355	31.82	33.1461	--	--	Molecular Function: DNA binding (GO:0003677);; Molecular Function: chromatin binding (GO:0003682);;	K09422|0|mdm:103401412|K09422 myb proto-oncogene protein, plant | (RefSeq) MYB6; transcription factor MYB44-like	[K]	Transcription	Transcription factor MYB73 OS=Arabidopsis thaliana OX=3702 GN=MYB73 PE=1 SV=1	K	Transcription	transcription factor MYB44-like [Malus domestica]
MD15G1288600	38.0704	31.827	40.538	11.1913	11.5103	20.6502	20.0521	34.3336	46.0909	7.77421	18.1358	17.576	[T]	Signal transduction mechanisms	Molecular Function: calmodulin-dependent protein kinase activity (GO:0004683);; Molecular Function: ATP binding (GO:0005524);; Biological Process: protein phosphorylation (GO:0006468);; Biological Process: signal transduction (GO:0007165);;	K12761|0|mdm:103412774|K12761 carbon catabolite-derepressing protein kinase [EC:2.7.11.1] | (RefSeq) CIPK21; CBL-interacting serine/threonine-protein kinase 11-like	[T]	Signal transduction mechanisms	CBL-interacting serine/threonine-protein kinase 11 OS=Arabidopsis thaliana OX=3702 GN=CIPK11 PE=1 SV=1	T	Signal transduction mechanisms	CBL-interacting serine/threonine-protein kinase 11-like [Malus domestica]
MD01G1108200	23.9979	47.5708	42.202	32.9406	17.1668	10.5354	22.1049	27.7243	48.4753	49.7435	35.5935	18.1739	[J]	Translation, ribosomal structure and biogenesis	--	K02998|0|mdm:103412154|K02998 small subunit ribosomal protein SAe | (RefSeq) 40S ribosomal protein SA-like	[J]	Translation, ribosomal structure and biogenesis	40S ribosomal protein SA OS=Cicer arietinum OX=3827 GN=RAP40 PE=2 SV=1	J	Translation, ribosomal structure and biogenesis	PREDICTED: 40S ribosomal protein SA-like [Malus domestica]
MD08G1099600	41.1203	28.8778	24.8667	34.7281	17.6979	11.1778	30.4252	40.9971	21.624	33.7638	31.3793	12.7121	[G]	Carbohydrate transport and metabolism	Biological Process: carbohydrate metabolic process (GO:0005975);; Molecular Function: intramolecular transferase activity, phosphotransferases (GO:0016868);;	--	[G]	Carbohydrate transport and metabolism	--	G	Carbohydrate transport and metabolism	PREDICTED: phosphoglucomutase isoform X1 [Malus domestica]
MD02G1278900	33.8361	22.8528	32.2527	9.18312	12.7905	20.7869	16.6391	35.9405	32.7947	7.18932	10.1477	19.5127	[P]	Inorganic ion transport and metabolism	--	K01537|0|mdm:103455902|K01537 Ca2+-transporting ATPase [EC:3.6.3.8] | (RefSeq) calcium-transporting ATPase 1, chloroplastic-like	[P]	Inorganic ion transport and metabolism	Calcium-transporting ATPase 1 OS=Arabidopsis thaliana OX=3702 GN=ACA1 PE=1 SV=3	P	Inorganic ion transport and metabolism	PREDICTED: calcium-transporting ATPase 1, chloroplastic-like isoform X1 [Malus domestica]
MD08G1055400	27.5873	12.8383	45.2738	21.3764	13.3304	7.4017	22.4272	22.7519	37.9683	9.31755	18.3144	6.41729	[J]	Translation, ribosomal structure and biogenesis	--	--	--	--	Putative 4-hydroxy-4-methyl-2-oxoglutarate aldolase 2 OS=Arabidopsis thaliana OX=3702 GN=At5g16450 PE=1 SV=1	H	Coenzyme transport and metabolism	PREDICTED: putative 4-hydroxy-4-methyl-2-oxoglutarate aldolase 2 [Malus domestica]
MD04G1231000	17.8771	20.8111	9.29476	33.5164	43.3641	24.6919	33.0031	27.8679	11.5138	50.7937	36.3359	73.4762	[J]	Translation, ribosomal structure and biogenesis	--	K11294|4.02159e-178|mdm:103433228|K11294 nucleolin | (RefSeq) 29 kDa ribonucleoprotein A, chloroplastic	[R]	General function prediction only	RNA-binding protein CP29B, chloroplastic OS=Arabidopsis thaliana OX=3702 GN=CP29B PE=1 SV=1	S	Function unknown	PREDICTED: 29 kDa ribonucleoprotein A, chloroplastic [Malus domestica]
MD16G1073500	29.2975	0.554888	25.7887	0.294948	1.04849	5.15325	16.7153	28.829	24.9138	10.8937	0.912623	2.92748	[R]	General function prediction only	Molecular Function: GTP binding (GO:0005525);; Cellular Component: endoplasmic reticulum (GO:0005783);; Cellular Component: Golgi apparatus (GO:0005794);; Biological Process: intracellular protein transport (GO:0006886);; Biological Process: vesicle-mediated transport (GO:0016192);;	K07953|6.20222e-113|mdm:103449219|K07953 GTP-binding protein SAR1 [EC:3.6.5.-] | (RefSeq) GTP-binding protein SAR1B	[U]	Intracellular trafficking, secretion, and vesicular transport	GTP-binding protein SAR1A OS=Arabidopsis thaliana OX=3702 GN=SAR1A PE=2 SV=1	U	Intracellular trafficking, secretion, and vesicular transport	PREDICTED: GTP-binding protein SAR1B [Malus domestica]
MD05G1251000	22.4576	20.2857	13.6946	11.057	7.78254	5.38753	26.6647	25.418	16.841	22.1558	16.8188	8.28239	--	--	Molecular Function: DNA binding (GO:0003677);; Molecular Function: RNA binding (GO:0003723);; Biological Process: RNA metabolic process (GO:0016070);;	K03260|0|mdm:103440710|K03260 translation initiation factor 4G | (RefSeq) eukaryotic translation initiation factor-like	[J]	Translation, ribosomal structure and biogenesis	Eukaryotic translation initiation factor isoform 4G-1 OS=Triticum aestivum OX=4565 PE=1 SV=2	J	Translation, ribosomal structure and biogenesis	PREDICTED: eukaryotic translation initiation factor-like [Malus domestica]
MD05G1060400	16.0196	13.1734	18.2278	21.0094	12.4246	11.0903	29.1271	19.4041	16.8841	35.3148	19.0229	14.9825	[H]	Coenzyme transport and metabolism	Molecular Function: GTP cyclohydrolase II activity (GO:0003935);; Molecular Function: 3,4-dihydroxy-2-butanone-4-phosphate synthase activity (GO:0008686);; Biological Process: riboflavin biosynthetic process (GO:0009231);; Cellular Component: chloroplast stroma (GO:0009570);; Cellular Component: membrane (GO:0016020);; Biological Process: root hair elongation (GO:0048767);;	K14652|0|mdm:103437501|K14652 3,4-dihydroxy 2-butanone 4-phosphate synthase / GTP cyclohydrolase II [EC:4.1.99.12 3.5.4.25] | (RefSeq) bifunctional riboflavin biosynthesis protein RIBA 1, chloroplastic-like	[H]	Coenzyme transport and metabolism	Bifunctional riboflavin biosynthesis protein RIBA 1, chloroplastic OS=Arabidopsis thaliana OX=3702 GN=RIBA1 PE=1 SV=2	H	Coenzyme transport and metabolism	bifunctional riboflavin biosynthesis protein RIBA 1, chloroplastic-like [Malus domestica]
MD09G1081000	19.4636	15.4521	19.7601	20.4297	27.2407	33.1245	21.0163	22.802	17.2401	7.76771	17.9772	32.0512	[T]	Signal transduction mechanisms	Molecular Function: protein serine/threonine kinase activity (GO:0004674);; Molecular Function: ATP binding (GO:0005524);; Biological Process: protein phosphorylation (GO:0006468);; Molecular Function: tau-protein kinase activity (GO:0050321);;	K03083|0|pxb:103946372|K03083 glycogen synthase kinase 3 beta [EC:2.7.11.26] | (RefSeq) shaggy-related protein kinase kappa	[G]	Carbohydrate transport and metabolism	Shaggy-related protein kinase kappa OS=Arabidopsis thaliana OX=3702 GN=ASK10 PE=2 SV=2	T	Signal transduction mechanisms	PREDICTED: shaggy-related protein kinase kappa [Pyrus x bretschneideri]
MD15G1357900	22.9552	33.1942	40.73	38.1775	93.0498	101.18	9.64637	14.0607	35.3863	15.2055	34.9828	144.243	[Z]	Cytoskeleton	Molecular Function: ATP binding (GO:0005524);; Cellular Component: cell wall (GO:0005618);; Cellular Component: nucleus (GO:0005634);; Cellular Component: cytoplasm (GO:0005737);; Cellular Component: cytoskeleton (GO:0005856);; Cellular Component: plasma membrane (GO:0005886);; Biological Process: root hair elongation (GO:0048767);;	K10355|0|mdm:103408379|K10355 actin, other eukaryote | (RefSeq) actin	[Z]	Cytoskeleton	Actin OS=Gossypium hirsutum OX=3635 PE=3 SV=1	Z	Cytoskeleton	PREDICTED: actin [Malus domestica]
MD01G1213900	17.9033	9.84606	11.4501	8.96602	5.63437	6.19573	23.5727	22.846	12.1117	7.07321	7.0254	5.66678	--	--	Molecular Function: nucleic acid binding (GO:0003676);; Molecular Function: zinc ion binding (GO:0008270);;	--	--	--	--	S	Function unknown	PREDICTED: uncharacterized protein LOC103435699 [Malus domestica]
MD15G1253900	19.3109	20.0728	29.0101	11.3509	14.1124	18.0228	7.90807	26.9105	23.5468	4.10054	7.44689	33.6453	[O]	Posttranslational modification, protein turnover, chaperones	Cellular Component: plasma membrane (GO:0005886);; Biological Process: ethylene biosynthetic process (GO:0009693);; Biological Process: embryo development (GO:0009790);;	K12158|4.38941e-91|pper:PRUPE_ppa012799mg|K12158 ubiquitin-like protein Nedd8 | (RefSeq) hypothetical protein	[OR]	--	Ubiquitin-NEDD8-like protein RUB1 OS=Deschampsia antarctica OX=159298 GN=RUB1 PE=2 SV=2	O	Posttranslational modification, protein turnover, chaperones	ubiquitin-NEDD8-like protein RUB2 [Prunus persica]
MD13G1200700	14.3114	12.3459	23.0148	11.9738	24.91	41.0608	15.8594	13.4307	22.6174	9.97538	13.0249	32.5943	--	--	--	--	[OR]	--	Probable serine protease EDA2 OS=Arabidopsis thaliana OX=3702 GN=EDA2 PE=2 SV=2	O	Posttranslational modification, protein turnover, chaperones	PREDICTED: probable serine protease EDA2 isoform X2 [Pyrus x bretschneideri]
MD12G1086900	11.4945	33.9923	24.7782	19.3719	9.90195	3.77155	13.4592	13.7303	24.2086	19.6823	10.3165	3.07628	[E]	Amino acid transport and metabolism	Molecular Function: obsolete gamma-glutamyltransferase activity (GO:0003840);; Cellular Component: vacuole (GO:0005773);; Biological Process: glutathione catabolic process (GO:0006751);; Molecular Function: glutathione gamma-glutamylcysteinyltransferase activity (GO:0016756);;	K18592|0|mdm:103449889|K18592 gamma-glutamyltranspeptidase / glutathione hydrolase / leukotriene-C4 hydrolase [EC:2.3.2.2 3.4.19.13 3.4.19.14] | (RefSeq) gamma-glutamyltranspeptidase 3	[E]	Amino acid transport and metabolism	Glutathione hydrolase 3 OS=Arabidopsis thaliana OX=3702 GN=GGT3 PE=2 SV=1	E	Amino acid transport and metabolism	PREDICTED: gamma-glutamyltranspeptidase 3 [Malus domestica]
MD02G1317900	17.9985	18.1389	19.4357	16.2858	8.80139	10.0403	16.2411	16.1056	16.8528	8.41926	11.8369	10.7096	[O]	Posttranslational modification, protein turnover, chaperones	--	--	[O]	Posttranslational modification, protein turnover, chaperones	Ubiquitin domain-containing protein DSK2b OS=Arabidopsis thaliana OX=3702 GN=DSK2B PE=1 SV=1	O	Posttranslational modification, protein turnover, chaperones	PREDICTED: large proline-rich protein BAG6-like isoform X3 [Malus domestica]
MD08G1243600	15.3209	17.9124	37.3961	28.3145	48.7644	51.2303	9.76475	12.8751	26.0814	19.0859	31.0176	48.3429	[H]	Coenzyme transport and metabolism	Molecular Function: methyltransferase activity (GO:0008168);; Biological Process: methylation (GO:0032259);;	--	--	--	Probable methyltransferase PMT2 OS=Arabidopsis thaliana OX=3702 GN=At1g26850 PE=2 SV=2	S	Function unknown	uncharacterized protein LOC103402903 [Malus domestica]
MD07G1250500	12.4147	7.9188	21.7225	1.07784	0.671909	0.188235	11.5808	12.8284	23.2749	0.225846	0.524329	0.523737	[R]	General function prediction only	--	--	[C]	Energy production and conversion	Perakine reductase OS=Rauvolfia serpentina OX=4060 GN=PR PE=1 SV=1	C	Energy production and conversion	PREDICTED: perakine reductase-like [Pyrus x bretschneideri]
MD05G1203600	31.1991	6.92596	7.16541	11.9424	8.96682	13.9297	19.0561	20.058	5.28049	7.75437	14.3483	12.3072	--	--	--	K14432|0|mdm:103441116|K14432 ABA responsive element binding factor | (RefSeq) ABSCISIC ACID-INSENSITIVE 5-like protein 5	--	--	ABSCISIC ACID-INSENSITIVE 5-like protein 5 OS=Arabidopsis thaliana OX=3702 GN=ABF2 PE=1 SV=1	K	Transcription	PREDICTED: ABSCISIC ACID-INSENSITIVE 5-like protein 5 isoform X2 [Malus domestica]
MD03G1042800	15.4146	19.5932	14.355	11.7541	5.6008	8.17534	13.2826	16.6029	13.7087	17.4895	19.1519	7.96989	--	--	--	K12471|0|mdm:103418810|K12471 epsin | (RefSeq) epsin-3-like	[F]	Nucleotide transport and metabolism	--	U	Intracellular trafficking, secretion, and vesicular transport	PREDICTED: epsin-3-like [Malus domestica]
MD15G1364900	10.295	12.26	22.3809	5.18954	7.5476	1.66301	10.5028	15.9323	15.4135	10.7568	7.34519	6.30093	--	--	--	--	--	--	--	S	Function unknown	PREDICTED: uncharacterized protein LOC103403206 [Malus domestica]
MD08G1037600	12.4775	23.8147	22.7879	4.95169	13.1629	7.82114	7.76458	11.5478	21.802	3.66806	5.06586	9.28807	[E]	Amino acid transport and metabolism	Molecular Function: ATP binding (GO:0005524);; Cellular Component: glycine cleavage complex (GO:0005960);; Biological Process: glycine decarboxylation via glycine cleavage system (GO:0019464);;	K02437|9.01591e-102|pxb:103945156|K02437 glycine cleavage system H protein | (RefSeq) glycine cleavage system H protein 2, mitochondrial	[E]	Amino acid transport and metabolism	Glycine cleavage system H protein 2, mitochondrial OS=Arabidopsis thaliana OX=3702 GN=GDH2 PE=2 SV=1	E	Amino acid transport and metabolism	PREDICTED: glycine cleavage system H protein 2, mitochondrial [Pyrus x bretschneideri]
MD17G1006700	8.34169	5.73904	4.27078	31.692	6.04207	4.31352	21.233	15.7864	3.8505	28.9499	26.2839	7.32277	--	--	Cellular Component: integral component of membrane (GO:0016021);;	--	[E]	Amino acid transport and metabolism	GABA transporter 1 OS=Arabidopsis thaliana OX=3702 GN=GAT1 PE=1 SV=1	E	Amino acid transport and metabolism	PREDICTED: GABA transporter 1-like [Pyrus x bretschneideri]
MD04G1001100	9.24164	14.9599	13.753	49.1954	22.5811	15.4915	8.9068	16.5125	12.7515	36.5707	49.6111	24.6768	[V]	Defense mechanisms	Biological Process: drug transmembrane transport (GO:0006855);; Molecular Function: drug transmembrane transporter activity (GO:0015238);; Molecular Function: antiporter activity (GO:0015297);; Cellular Component: membrane (GO:0016020);;	K03327|0|mdm:103410500|K03327 multidrug resistance protein, MATE family | (RefSeq) protein DETOXIFICATION 33-like	[R]	General function prediction only	Protein DETOXIFICATION 33 OS=Arabidopsis thaliana OX=3702 GN=DTX33 PE=2 SV=1	V	Defense mechanisms	PREDICTED: protein DETOXIFICATION 33-like [Malus domestica]
MD16G1152600	12.2834	16.2926	10.534	15.036	11.3632	13.0137	7.92099	12.5062	17.422	8.60803	14.3803	10.5601	--	--	--	--	--	--	Polyadenylate-binding protein-interacting protein 5 OS=Arabidopsis thaliana OX=3702 GN=CID5 PE=2 SV=1	S	Function unknown	PREDICTED: polyadenylate-binding protein-interacting protein 6-like [Malus domestica]
MD02G1114900	11.2691	13.3926	14.6994	12.1622	6.96438	6.43851	11.5749	10.7247	14.5757	17.8052	18.19	8.33461	--	--	--	--	--	--	--	S	Function unknown	PREDICTED: uncharacterized protein LOC103964371 isoform X1 [Pyrus x bretschneideri]
MD16G1101500	13.6672	12.3095	18.3364	0.085587	0.389398	0.597381	10.3324	8.59593	17.3715	0	0	0.958135	[Q]	Secondary metabolites biosynthesis, transport and catabolism	Molecular Function: oxidoreductase activity, acting on paired donors, with incorporation or reduction of molecular oxygen, 2-oxoglutarate as one donor, and incorporation of one atom each of oxygen into both donors (GO:0016706);; Biological Process: oxidation-reduction process (GO:0055114);;	--	[QR]	--	Codeine O-demethylase OS=Papaver somniferum OX=3469 GN=CODM PE=1 SV=1	S	Function unknown	PREDICTED: codeine O-demethylase-like isoform X2 [Malus domestica]
MD17G1035600	10.0539	10.7488	10.4826	16.0539	4.67196	5.31791	10.9112	10.9408	13.0445	29.6278	25.3341	4.96147	[I]	Lipid transport and metabolism	Biological Process: long-chain fatty acid metabolic process (GO:0001676);; Molecular Function: acyl-CoA dehydrogenase activity (GO:0003995);; Molecular Function: acyl-CoA oxidase activity (GO:0003997);; Cellular Component: peroxisome (GO:0005777);; Biological Process: fatty acid beta-oxidation (GO:0006635);; Biological Process: response to cytokinin (GO:0009735);; Biological Process: proteasome-m…	K00232|0|mdm:103401681|K00232 acyl-CoA oxidase [EC:1.3.3.6] | (RefSeq) acyl-coenzyme A oxidase 2, peroxisomal-like	[IQ]	--	Acyl-coenzyme A oxidase 2, peroxisomal OS=Arabidopsis thaliana OX=3702 GN=ACX2 PE=1 SV=2	I	Lipid transport and metabolism	PREDICTED: acyl-coenzyme A oxidase 2, peroxisomal-like [Malus domestica]
MD04G1016900	10.8214	19.1433	7.17979	5.41873	0.676108	0.909745	12.8162	13.2123	8.12642	3.39416	2.62904	0.778556	--	--	--	--	[D]	Cell cycle control, cell division, chromosome partitioning	--	L	Replication, recombination and repair	PREDICTED: uncharacterized protein LOC103430676 isoform X2 [Malus domestica]
MD08G1136600	13.2498	14.2587	14.3475	5.69256	15.1974	18.9765	7.69326	10.1841	15.8788	0.835006	3.99374	21.2202	--	--	--	--	--	--	--	S	Function unknown	PREDICTED: uncharacterized protein LOC103434215 [Malus domestica]
MD05G1341900	10.4005	7.81373	5.99226	7.38339	4.52035	3.73365	13.3613	12.9835	7.32889	7.66412	5.73385	5.31991	[H]	Coenzyme transport and metabolism	--	K10685|0|mdm:103420916|K10685 ubiquitin-like 1-activating enzyme E1 B [EC:6.2.1.45] | (RefSeq) SUMO-activating enzyme subunit 2-like	[O]	Posttranslational modification, protein turnover, chaperones	SUMO-activating enzyme subunit 2 OS=Arabidopsis thaliana OX=3702 GN=SAE2 PE=1 SV=1	H	Coenzyme transport and metabolism	PREDICTED: SUMO-activating enzyme subunit 2-like isoform X1 [Malus domestica]
MD09G1062400	11.8585	11.1865	11.2306	9.92283	5.32421	8.36016	10.2728	8.54469	13.8417	10.6395	9.28065	6.73934	[L]	Replication, recombination and repair	--	K10706|0|mdm:103439081|K10706 senataxin [EC:3.6.4.-] | (RefSeq) uncharacterized LOC103439081	[A]	RNA processing and modification	Probable helicase MAGATAMA 3 OS=Arabidopsis thaliana OX=3702 GN=MAA3 PE=2 SV=1	L	Replication, recombination and repair	PREDICTED: uncharacterized protein LOC103439081 [Malus domestica]
MD01G1036500	17.9728	4.44376	1.60362	1.77634	5.41171	6.30456	18.3539	10.9874	2.12579	0.982329	1.68289	2.40858	[T]	Signal transduction mechanisms	Biological Process: reproduction (GO:0000003);; Biological Process: cellular process (GO:0009987);; Biological Process: multicellular organismal process (GO:0032501);; Cellular Component: intracellular part (GO:0044424);; Biological Process: anatomical structure development (GO:0048856);;	--	[T]	Signal transduction mechanisms	Probable calcium-binding protein CML25 OS=Arabidopsis thaliana OX=3702 GN=CML25 PE=2 SV=1	DTZ	--	PREDICTED: probable calcium-binding protein CML18 [Malus domestica]
MD02G1244800	9.22228	9.42437	10.7315	3.54165	4.35696	2.16092	10.4694	8.95071	11.1271	1.49931	2.49027	2.94532	--	--	Biological Process: carbohydrate metabolic process (GO:0005975);; Molecular Function: glucan endo-1,3-beta-D-glucosidase activity (GO:0042973);;	K19893|0|mdm:103443523|K19893 glucan endo-1,3-beta-glucosidase 5/6 [EC:3.2.1.39] | (RefSeq) glucan endo-1,3-beta-glucosidase 6	--	--	Glucan endo-1,3-beta-glucosidase 6 OS=Arabidopsis thaliana OX=3702 GN=At5g58090 PE=1 SV=2	G	Carbohydrate transport and metabolism	PREDICTED: glucan endo-1,3-beta-glucosidase 6 [Malus domestica]
MD08G1128400	23.8646	15.3428	19.1	26.6544	26.9879	31.3189	9.32148	10.4707	10.1384	38.6948	23.8963	29.681	[G]	Carbohydrate transport and metabolism	Molecular Function: transporter activity (GO:0005215);; Biological Process: sodium ion transport (GO:0006814);; Cellular Component: membrane (GO:0016020);; Biological Process: transmembrane transport (GO:0055085);;	K14445|0|mdm:103434430|K14445 solute carrier family 13 (sodium-dependent dicarboxylate transporter), member 2/3/5 | (RefSeq) tonoplast dicarboxylate transporter	[P]	Inorganic ion transport and metabolism	Tonoplast dicarboxylate transporter OS=Arabidopsis thaliana OX=3702 GN=TDT PE=2 SV=2	P	Inorganic ion transport and metabolism	PREDICTED: tonoplast dicarboxylate transporter [Malus domestica]
MD03G1095100	8.85564	22.8681	9.96311	0	1.3372	0.274964	6.86509	12.1336	10.443	0	0.311332	0.718617	[IQR]	--	Molecular Function: cyclopentanol dehydrogenase activity (GO:0055041);; Biological Process: oxidation-reduction process (GO:0055114);;	--	[R]	General function prediction only	Secoisolariciresinol dehydrogenase (Fragment) OS=Podophyllum peltatum OX=35933 PE=1 SV=1	S	Function unknown	PREDICTED: secoisolariciresinol dehydrogenase-like [Pyrus x bretschneideri]
MD10G1198000	12.043	6.40054	7.92089	8.37241	4.95251	3.79849	8.2312	9.38262	11.4986	5.83366	5.84908	4.3833	--	--	--	--	[K]	Transcription	Transcription elongation factor TFIIS OS=Arabidopsis thaliana OX=3702 GN=TFIIS PE=1 SV=1	K	Transcription	PREDICTED: uncharacterized protein LOC103401688 [Malus domestica]
MD10G1265500	4.24556	2.24506	6.29655	1.66263	3.68728	2.92105	6.83699	18.7377	3.02633	1.70028	1.03725	1.45694	--	--	--	--	--	--	--	S	Function unknown	PREDICTED: uncharacterized protein LOC103456208 [Malus domestica]
MD01G1062700	13.7113	9.41599	6.99041	7.43709	3.99595	2.91976	6.22734	13.5834	7.1165	5.35546	5.8137	4.14557	[E]	Amino acid transport and metabolism	Molecular Function: N2-acetyl-L-ornithine:2-oxoglutarate 5-aminotransferase activity (GO:0003992);; Biological Process: arginine metabolic process (GO:0006525);; Molecular Function: pyridoxal phosphate binding (GO:0030170);;	K00818|0|mdm:103435413|K00818 acetylornithine aminotransferase [EC:2.6.1.11] | (RefSeq) acetylornithine aminotransferase, mitochondrial-like	[E]	Amino acid transport and metabolism	Acetylornithine aminotransferase, mitochondrial OS=Alnus glutinosa OX=3517 GN=AG118 PE=2 SV=1	E	Amino acid transport and metabolism	PREDICTED: acetylornithine aminotransferase, mitochondrial-like [Malus domestica]
MD06G1224500	7.62975	8.07482	10.8771	10.8669	2.98952	4.23596	7.04841	8.03773	11.261	11.7171	8.98188	4.25235	--	--	--	--	[O]	Posttranslational modification, protein turnover, chaperones	Probable E3 ubiquitin-protein ligase HIP1 OS=Oryza sativa subsp. japonica OX=39947 GN=HIP1 PE=1 SV=2	O	Posttranslational modification, protein turnover, chaperones	PREDICTED: E3 ubiquitin-protein ligase RNF6-like [Malus domestica]
MD03G1252200	2.70442	3.4246	2.27041	45.5524	19.8064	26.221	11.6068	11.5395	1.50096	40.5258	51.5323	23.9984	[R]	General function prediction only	--	--	[R]	General function prediction only	--	S	Function unknown	PREDICTED: uncharacterized protein LOC103455619 isoform X1 [Malus domestica]
MD11G1000700	6.27477	4.61269	7.52596	4.55234	5.2028	5.48853	8.42445	7.63398	7.83036	3.58587	5.12582	6.34174	[K]	Transcription	--	K10268|0|mdm:103447300|K10268 F-box and leucine-rich repeat protein 2/20 | (RefSeq) F-box/LRR-repeat protein 3-like	[R]	General function prediction only	F-box/LRR-repeat protein 3 OS=Arabidopsis thaliana OX=3702 GN=FBL3 PE=2 SV=1	S	Function unknown	PREDICTED: F-box/LRR-repeat protein 3-like [Malus domestica]
MD15G1419800	4.94972	16.1512	8.75981	0.052519	4.61032	7.42487	1.79865	9.65836	12.2231	0	1.06366	3.73204	--	--	--	--	--	--	--	S	Function unknown	PREDICTED: uncharacterized protein LOC103455361 [Malus domestica]
MD08G1049100	5.3766	8.41285	7.59214	3.85614	2.72625	3.7039	8.18218	8.51959	6.90915	2.80321	5.55067	2.61777	--	--	--	K12125|0|mdm:103421088|K12125 protein EARLY FLOWERING 3 | (RefSeq) protein EARLY FLOWERING 3-like	--	--	Protein EARLY FLOWERING 3 OS=Arabidopsis thaliana OX=3702 GN=ELF3 PE=1 SV=1	--	--	PREDICTED: protein EARLY FLOWERING 3-like [Malus domestica]
MD16G1125900	9.94327	12.5159	15.3015	3.90223	17.8873	15.987	3.73402	6.55648	12.3407	2.67402	3.73436	17.0005	--	--	--	--	--	--	O-fucosyltransferase 39 OS=Arabidopsis thaliana OX=3702 GN=OFUT39 PE=2 SV=1	S	Function unknown	PREDICTED: uncharacterized protein At1g04910-like isoform X1 [Malus domestica]
MD14G1235300	7.11464	6.54509	6.92033	4.32761	3.97307	2.60603	6.9118	6.71192	8.91522	5.84939	4.16363	6.43422	[T]	Signal transduction mechanisms	Molecular Function: protein serine/threonine phosphatase activity (GO:0004722);; Biological Process: protein dephosphorylation (GO:0006470);; Molecular Function: metal ion binding (GO:0046872);;	K01102|0|mdm:103425614|K01102 pyruvate dehydrogenase phosphatase [EC:3.1.3.43] | (RefSeq) probable protein phosphatase 2C 42	[T]	Signal transduction mechanisms	Probable protein phosphatase 2C 42 OS=Arabidopsis thaliana OX=3702 GN=At3g17090 PE=2 SV=1	T	Signal transduction mechanisms	PREDICTED: probable protein phosphatase 2C 42 [Malus domestica]
MD12G1165800	5.12923	0.710251	2.30485	0.447683	13.3238	13.4903	10.9714	11.1178	1.70392	0.020255	0.185729	24.3086	[P]	Inorganic ion transport and metabolism	Biological Process: calcium ion transport (GO:0006816);; Molecular Function: calcium:proton antiporter activity (GO:0015369);; Cellular Component: integral component of membrane (GO:0016021);; Biological Process: transmembrane transport (GO:0055085);;	K07300|0|mdm:103450620|K07300 Ca2+:H+ antiporter | (RefSeq) vacuolar cation/proton exchanger 3-like	[P]	Inorganic ion transport and metabolism	Vacuolar cation/proton exchanger 3 OS=Arabidopsis thaliana OX=3702 GN=CAX3 PE=1 SV=1	P	Inorganic ion transport and metabolism	PREDICTED: vacuolar cation/proton exchanger 3-like [Malus domestica]
MD07G1000400	7.17511	14.2082	19.4424	11.8845	17.8668	29.6463	6.38825	6.8281	9.19818	0	6.24095	24.7341	--	--	--	--	--	--	Protein trichome birefringence-like 19 OS=Arabidopsis thaliana OX=3702 GN=TBL19 PE=3 SV=1	S	Function unknown	PREDICTED: protein trichome birefringence-like 19 [Malus domestica]
MD15G1327100	7.32058	1.71566	4.25784	0.785162	1.06736	0.744973	6.71716	8.9416	6.58699	0.534671	1.34338	1.21196	[HR]	--	--	--	--	--	--	S	Function unknown	PREDICTED: uncharacterized protein LOC103956408 [Pyrus x bretschneideri]
MD03G1065000	10.5676	8.64028	13.4553	1.53599	4.09669	2.26275	4.31532	6.47638	10.8377	0.958862	1.53401	2.38515	--	--	--	K10581|0|mdm:103446408|K10581 ubiquitin-conjugating enzyme E2 O [EC:2.3.2.24] | (RefSeq) probable ubiquitin-conjugating enzyme E2 24	[O]	Posttranslational modification, protein turnover, chaperones	Probable ubiquitin-conjugating enzyme E2 24 OS=Arabidopsis thaliana OX=3702 GN=UBC24 PE=1 SV=1	O	Posttranslational modification, protein turnover, chaperones	PREDICTED: probable ubiquitin-conjugating enzyme E2 24 [Malus domestica]
MD12G1167300	6.43422	0.073718	4.27795	0.083756	0.130924	0.131437	5.41234	5.97421	10.2033	0	0.330035	0.131309	--	--	Cellular Component: late endosome (GO:0005770);; Cellular Component: vacuolar membrane (GO:0005774);; Cellular Component: Golgi apparatus (GO:0005794);; Cellular Component: plasmodesma (GO:0009506);; Biological Process: response to abscisic acid (GO:0009737);; Molecular Function: high-affinity copper ion transmembrane transporter activity (GO:0015089);; Biological Process: intracellular copper io…	K14686|1.28892e-82|mdm:103410555|K14686 solute carrier family 31 (copper transporter), member 1 | (RefSeq) copper transporter 5.1-like	[P]	Inorganic ion transport and metabolism	Copper transporter 5 OS=Arabidopsis thaliana OX=3702 GN=COPT5 PE=1 SV=1	P	Inorganic ion transport and metabolism	PREDICTED: copper transporter 5.1-like [Malus domestica]
MD04G1096600	9.07633	7.60782	4.42994	0.652345	7.23256	8.14688	6.59324	9.54142	4.37083	0.779256	0.880335	10.77	[G]	Carbohydrate transport and metabolism	Biological Process: polysaccharide catabolic process (GO:0000272);; Cellular Component: chloroplast (GO:0009507);; Molecular Function: beta-amylase activity (GO:0016161);; Molecular Function: cation binding (GO:0043169);;	--	--	--	Beta-amylase OS=Glycine max OX=3847 GN=BMY1 PE=1 SV=3	G	Carbohydrate transport and metabolism	PREDICTED: LOW QUALITY PROTEIN: beta-amylase-like [Malus domestica]
MD10G1237000	6.30145	10.0176	6.10012	6.63034	5.39181	6.2746	7.02949	7.16454	6.05463	3.70044	7.37744	4.88547	--	--	Cellular Component: cytoplasm (GO:0005737);; Biological Process: proteolysis (GO:0006508);; Biological Process: autophagy (GO:0006914);; Molecular Function: cysteine-type peptidase activity (GO:0008234);; Biological Process: protein transport (GO:0015031);;	K08342|0|mdm:103409907|K08342 cysteine protease ATG4 [EC:3.4.22.-] | (RefSeq) cysteine protease ATG4-like	[ZU]	--	Cysteine protease ATG4 OS=Medicago truncatula OX=3880 GN=ATG4 PE=3 SV=1	O	Posttranslational modification, protein turnover, chaperones	PREDICTED: cysteine protease ATG4-like isoform X2 [Malus domestica]
MD10G1294500	5.08792	10.5422	10.3644	9.74775	9.56413	5.77925	4.37545	4.21865	10.4666	9.78245	10.2973	7.51986	--	--	--	--	[TR]	--	--	U	Intracellular trafficking, secretion, and vesicular transport	PREDICTED: transmembrane protein 56 isoform X1 [Malus domestica]
MD15G1374000	6.13611	6.74859	14.3522	2.51524	7.57072	15.1717	3.23824	3.76102	10.8776	0.777622	2.21962	12.8285	--	--	--	--	[S]	Function unknown	--	S	Function unknown	PREDICTED: uncharacterized protein LOC103404348 [Malus domestica]
MD17G1256500	2.31314	2.78926	2.5735	1.4304	1.36774	2.09596	5.61431	7.45235	3.94512	2.64435	2.89536	1.08306	--	--	Molecular Function: magnesium ion transmembrane transporter activity (GO:0015095);; Biological Process: magnesium ion transport (GO:0015693);; Cellular Component: membrane (GO:0016020);; Biological Process: transmembrane transport (GO:0055085);;	K16075|0|mdm:103402535|K16075 magnesium transporter | (RefSeq) magnesium transporter MRS2-4	[P]	Inorganic ion transport and metabolism	Magnesium transporter MRS2-4 OS=Arabidopsis thaliana OX=3702 GN=MRS2-4 PE=2 SV=1	U	Intracellular trafficking, secretion, and vesicular transport	PREDICTED: magnesium transporter MRS2-4 [Malus domestica]
MD05G1340800	5.23782	8.87187	10.7182	1.07497	1.66027	0.713943	2.41838	3.03022	11.4519	0.748409	0.726746	0.770916	--	--	Cellular Component: plasma membrane (GO:0005886);;	--	--	--	--	S	Function unknown	PREDICTED: uncharacterized protein LOC103455958 [Malus domestica]
MD06G1013000	3.02037	7.20613	6.26668	2.7905	3.22381	3.43339	3.35832	4.39386	8.93808	5.01215	5.52053	5.08944	[O]	Posttranslational modification, protein turnover, chaperones	--	K09510|0|mdm:103452947|K09510 DnaJ homolog subfamily B member 4 | (RefSeq) dnaJ homolog subfamily B member 1-like	[O]	Posttranslational modification, protein turnover, chaperones	DnaJ protein ERDJ3B OS=Arabidopsis thaliana OX=3702 GN=ERDJ3B PE=1 SV=1	O	Posttranslational modification, protein turnover, chaperones	PREDICTED: dnaJ homolog subfamily B member 1-like [Malus domestica]
MD10G1145100	6.14355	5.454	4.50829	4.29246	3.57213	4.55816	6.52533	6.4999	3.65657	7.62596	4.23745	4.46297	--	--	--	--	[A]	RNA processing and modification	--	S	Function unknown	PREDICTED: LYR motif-containing protein 4 [Malus domestica]
MD05G1081400	2.89216	5.48844	2.4795	2.02474	19.4693	12.5769	9.1512	5.17389	2.32363	1.72732	1.09812	12.2284	--	--	--	--	--	--	--	S	Function unknown	PREDICTED: uncharacterized protein LOC103955487 [Pyrus x bretschneideri]
MD01G1000300	10.3303	6.28333	2.19915	0.020693	3.83942	0.338916	6.72767	7.72366	1.90321	3.67345	6.63662	0.273366	[IQR]	--	Molecular Function: nucleotide binding (GO:0000166);; Molecular Function: 3-oxoacyl-[acyl-carrier-protein] reductase (NADPH) activity (GO:0004316);; Cellular Component: cytosol (GO:0005829);; Biological Process: proline biosynthetic process (GO:0006561);; Biological Process: response to heat (GO:0009408);; Biological Process: response to water deprivation (GO:0009414);; Biological Process: respon…	K09841|0|mdm:103446486|K09841 xanthoxin dehydrogenase [EC:1.1.1.288] | (RefSeq) xanthoxin dehydrogenase	[R]	General function prediction only	Xanthoxin dehydrogenase OS=Arabidopsis thaliana OX=3702 GN=ABA2 PE=1 SV=1	S	Function unknown	PREDICTED: xanthoxin dehydrogenase isoform X2 [Malus domestica]
MD08G1079800	6.01358	6.95285	11.3099	14.4914	1.46722	2.33951	2.23235	2.12244	11.9275	0.421836	2.69489	1.79614	[HR]	--	--	--	--	--	Methylesterase 17 OS=Arabidopsis thaliana OX=3702 GN=MES17 PE=1 SV=1	S	Function unknown	PREDICTED: methylesterase 17-like [Malus domestica]
MD08G1074200	5.82083	4.24277	3.89238	21.7212	18.1145	25.5992	5.84113	5.51939	4.67818	13.4427	27.7346	32.0021	[T]	Signal transduction mechanisms	--	K00898|1.61615e-120|pxb:103950319|K00898 pyruvate dehydrogenase kinase 2/3/4 [EC:2.7.11.2] | (RefSeq) pyruvate dehydrogenase (acetyl-transferring) kinase, mitochondrial-like	[T]	Signal transduction mechanisms	[Pyruvate dehydrogenase (acetyl-transferring)] kinase, mitochondrial OS=Arabidopsis thaliana OX=3702 GN=PDK PE=1 SV=1	T	Signal transduction mechanisms	PREDICTED: pyruvate dehydrogenase (acetyl-transferring) kinase, mitochondrial-like isoform X2 [Malus domestica]
MD02G1003800	2.89313	8.08592	14.3566	5.07655	2.23296	1.06717	2.6611	2.40038	10.6626	2.53138	4.96792	1.5346	--	--	--	--	--	--	O-fucosyltransferase 20 OS=Arabidopsis thaliana OX=3702 GN=OFUT20 PE=1 SV=1	S	Function unknown	PREDICTED: uncharacterized protein At1g04910-like [Malus domestica]
Apple_newGene_90361	2.93841	4.56312	4.34101	3.46775	6.09078	4.19638	6.49903	5.14807	3.22689	2.56666	3.11409	5.42702	--	--	--	--	--	--	--	S	Function unknown	PREDICTED: uncharacterized protein LOC103440014 [Malus domestica]
MD02G1273500	4.70219	1.84738	3.03549	6.6588	4.50035	4.51112	4.87162	6.33233	3.3935	3.7011	4.55821	5.55718	--	--	--	--	--	--	--	S	Function unknown	PREDICTED: uncharacterized protein LOC103441881 isoform X2 [Malus domestica]
MD15G1342000	3.24978	1.89473	2.70208	5.91445	6.17658	10.2644	5.7754	5.38945	2.54284	1.70954	7.39534	9.21196	--	--	--	--	--	--	CRIB domain-containing protein RIC7 OS=Arabidopsis thaliana OX=3702 GN=RIC7 PE=1 SV=1	S	Function unknown	PREDICTED: CRIB domain-containing protein RIC10-like isoform X2 [Malus domestica]
MD13G1054800	4.45429	5.60719	12.9149	1.17695	3.98089	4.76017	0.695159	0.94484	11.3554	0.40187	0.625407	5.62884	--	--	--	--	--	--	Protein NSP-INTERACTING KINASE 1 OS=Arabidopsis thaliana OX=3702 GN=NIK1 PE=1 SV=1	T	Signal transduction mechanisms	PREDICTED: protein NSP-INTERACTING KINASE 1-like [Malus domestica]
MD12G1104300	4.62277	5.85262	2.28167	3.97445	3.20681	6.23353	3.81008	4.61032	3.63237	2.21275	5.43267	3.7892	--	--	--	--	--	--	--	--	--	PREDICTED: uncharacterized protein LOC103419842 [Malus domestica]
MD04G1100400	7.39406	5.69476	2.77461	11.8787	5.76365	2.44853	4.71684	4.47685	2.67616	12.211	10.0758	3.49652	--	--	--	--	--	--	Methyl-CpG-binding domain-containing protein 10 OS=Arabidopsis thaliana OX=3702 GN=MBD10 PE=1 SV=1	S	Function unknown	PREDICTED: methyl-CpG-binding domain-containing protein 11 [Malus domestica]
MD07G1003800	3.68256	2.63918	2.52084	4.56095	16.5537	11.6091	4.60282	3.8573	3.21705	2.42857	4.14641	19.7674	[H]	Coenzyme transport and metabolism	Molecular Function: hydroxymethylbilane synthase activity (GO:0004418);; Biological Process: peptidyl-pyrromethane cofactor linkage (GO:0018160);; Biological Process: tetrapyrrole biosynthetic process (GO:0033014);;	K01749|0|mdm:103425596|K01749 hydroxymethylbilane synthase [EC:2.5.1.61] | (RefSeq) porphobilinogen deaminase, chloroplastic-like	[H]	Coenzyme transport and metabolism	Porphobilinogen deaminase, chloroplastic OS=Pisum sativum OX=3888 GN=HEMC PE=1 SV=1	H	Coenzyme transport and metabolism	PREDICTED: porphobilinogen deaminase, chloroplastic-like [Malus domestica]
MD05G1323200	1.51934	3.77366	11.2437	0.211712	1.42563	0.579001	0.013645	0.44144	10.872	0.31861	0.318848	1.9326	--	--	Molecular Function: inorganic anion exchanger activity (GO:0005452);; Cellular Component: plasma membrane (GO:0005886);; Biological Process: anion transport (GO:0006820);; Cellular Component: integral component of membrane (GO:0016021);;	--	[P]	Inorganic ion transport and metabolism	Probable boron transporter 2 OS=Arabidopsis thaliana OX=3702 GN=BOR2 PE=2 SV=1	U	Intracellular trafficking, secretion, and vesicular transport	PREDICTED: probable boron transporter 2 isoform X1 [Malus domestica]
MD13G1170000	4.07417	8.20233	7.88402	4.89589	2.41737	1.96268	2.3896	2.76187	5.76131	1.30186	3.81054	1.88216	--	--	Molecular Function: transcription factor activity, sequence-specific DNA binding (GO:0003700);; Cellular Component: nucleus (GO:0005634);; Biological Process: regulation of transcription, DNA-templated (GO:0006355);; Molecular Function: sequence-specific DNA binding (GO:0043565);;	--	--	--	WUSCHEL-related homeobox 13 OS=Arabidopsis thaliana OX=3702 GN=WOX13 PE=2 SV=1	K	Transcription	PREDICTED: WUSCHEL-related homeobox 13-like [Malus domestica]
MD05G1214000	1.18295	3.59399	15.8555	1.74389	18.0445	44.1447	0.676111	0.658378	9.50024	0.079399	0.804389	33.6691	--	--	Molecular Function: ATP binding (GO:0005524);; Molecular Function: kinase activity (GO:0016301);; Biological Process: phosphorylation (GO:0016310);;	--	--	--	--	S	Function unknown	PREDICTED: uncharacterized protein LOC103938164 isoform X1 [Pyrus x bretschneideri]
MD14G1026500	5.76826	3.52539	1.647	2.59098	2.05112	1.26478	1.68288	6.36696	1.84001	2.60323	1.70464	1.71771	--	--	--	--	--	--	--	S	Function unknown	PREDICTED: uncharacterized protein LOC103943640 [Pyrus x bretschneideri]
MD07G1308400	2.39688	6.55644	2.00789	4.05386	3.95452	3.59107	4.2456	3.2741	2.25924	3.29815	2.98454	3.15663	--	--	--	--	--	--	Cell number regulator 6 OS=Zea mays OX=4577 GN=CNR6 PE=2 SV=1	S	Function unknown	PREDICTED: cell number regulator 6-like [Malus domestica]
MD11G1268600	2.45546	1.57401	1.66619	1.74772	1.58073	1.65577	4.02959	3.05328	2.35138	0.74414	1.2636	1.76536	--	--	--	K15326|0|mdm:103423269|K15326 tRNA-splicing endonuclease subunit Sen54 | (RefSeq) uncharacterized LOC103423269	[J]	Translation, ribosomal structure and biogenesis	--	S	Function unknown	PREDICTED: uncharacterized protein LOC103423269 [Malus domestica]
MD02G1120900	1.47913	4.83237	4.25353	5.02126	46.0303	11.1644	2.11763	1.33375	4.07327	2.68892	13.1507	14.9853	[G]	Carbohydrate transport and metabolism	--	--	--	--	Probable starch synthase 4, chloroplastic/amyloplastic OS=Arabidopsis thaliana OX=3702 GN=SS4 PE=1 SV=1	G	Carbohydrate transport and metabolism	PREDICTED: probable starch synthase 4, chloroplastic/amyloplastic [Malus domestica]
MD01G1228600	1.75479	6.72526	6.26999	1.72162	0.078033	0.136261	2.64989	1.58736	2.62451	0.68785	0.47675	0.078562	--	--	--	--	[E]	Amino acid transport and metabolism	Proline transporter 1 OS=Arabidopsis thaliana OX=3702 GN=PROT1 PE=1 SV=1	E	Amino acid transport and metabolism	PREDICTED: proline transporter 2-like [Malus domestica]
MD09G1055800	1.98812	0.74489	1.55398	0.596566	4.24526	3.54931	1.78489	2.62331	1.66987	0.119085	0.57515	6.4923	--	--	--	--	--	--	--	S	Function unknown	PREDICTED: uncharacterized protein LOC103444133 [Malus domestica]
MD17G1210700	2.13954	8.22956	1.44734	7.09151	12.0968	6.05075	1.86125	2.35044	1.58152	24.6468	12.0113	10.6728	[Q]	Secondary metabolites biosynthesis, transport and catabolism	Molecular Function: oxidoreductase activity (GO:0016491);; Biological Process: oxidation-reduction process (GO:0055114);;	--	[R]	General function prediction only	Non-functional NADPH-dependent codeinone reductase 2 OS=Papaver somniferum OX=3469 GN=COR2 PE=1 SV=1	S	Function unknown	PREDICTED: non-functional NADPH-dependent codeinone reductase 2-like [Malus domestica]
MD09G1103800	9.63445	1.12209	0.082811	3.14056	3.99155	10.2066	0.437412	4.80848	0.044669	38.2913	8.2774	6.66653	--	--	Biological Process: response to stress (GO:0006950);; Biological Process: response to water (GO:0009415);;	--	--	--	Dehydrin DHN1 OS=Hordeum vulgare OX=4513 GN=DHN1 PE=2 SV=1	S	Function unknown	dehydrin 6 [Malus domestica]
MD05G1283300	0.853426	3.8357	4.3556	1.4434	2.43605	2.65289	0.085088	0.102704	4.43716	0.36227	1.43567	3.7295	--	--	--	--	[O]	Posttranslational modification, protein turnover, chaperones	Receptor homology region, transmembrane domain- and RING domain-containing protein 2 OS=Oryza sativa subsp. japonica OX=39947 GN=RMR1 PE=2 SV=2	O	Posttranslational modification, protein turnover, chaperones	PREDICTED: E3 ubiquitin-protein ligase RNF6 isoform X1 [Malus domestica]
MD17G1124900	0.663057	3.0234	1.18768	1.14312	3.12785	4.19775	1.09368	2.71104	0.560639	0.287823	0.734985	3.21599	[K]	Transcription	--	K13457|0|mdm:103416870|K13457 disease resistance protein RPM1 | (RefSeq) disease resistance protein RPM1-like	[T]	Signal transduction mechanisms	Disease resistance protein RPM1 OS=Arabidopsis thaliana OX=3702 GN=RPM1 PE=1 SV=1	S	Function unknown	PREDICTED: disease resistance protein RPM1-like [Malus domestica]
MD08G1162600	0.273667	2.47563	0.447575	57.8484	185.759	212.219	1.97521	2.17182	0.169446	16.8532	39.9115	305.841	[E]	Amino acid transport and metabolism	Cellular Component: glycine cleavage complex (GO:0005960);; Biological Process: glycine decarboxylation via glycine cleavage system (GO:0019464);;	K02437|1.31077e-100|mdm:103409716|K02437 glycine cleavage system H protein | (RefSeq) glycine cleavage system H protein 3, mitochondrial	[E]	Amino acid transport and metabolism	Glycine cleavage system H protein, mitochondrial OS=Flaveria anomala OX=35877 GN=GDCSH PE=2 SV=1	E	Amino acid transport and metabolism	PREDICTED: glycine cleavage system H protein 3, mitochondrial [Malus domestica]
MD09G1244200	1.34623	2.387	2.07493	1.23317	3.56404	2.64418	0.922443	1.01264	2.14108	0.393992	0.995452	3.17393	[L]	Replication, recombination and repair	Cellular Component: ubiquitin ligase complex (GO:0000151);; Molecular Function: ubiquitin-protein transferase activity (GO:0004842);; Biological Process: protein ubiquitination (GO:0016567);;	--	--	--	U-box domain-containing protein 30 OS=Arabidopsis thaliana OX=3702 GN=PUB30 PE=2 SV=1	O	Posttranslational modification, protein turnover, chaperones	PREDICTED: U-box domain-containing protein 30-like [Malus domestica]
MD11G1268800	1.47005	2.48202	1.4057	1.16789	0.912207	0.949274	1.2958	1.07592	1.44521	0.420254	1.23651	1.40608	--	--	--	--	--	--	--	--	--	PREDICTED: uncharacterized protein LOC108171998 isoform X1 [Malus domestica]
MD01G1214500	3.32299	0.775819	2.68703	1.39425	1.39656	1.45325	0.789918	1.94098	0.986818	0.209103	0.832883	1.25631	[W]	Extracellular structures	--	--	--	--	G-type lectin S-receptor-like serine/threonine-protein kinase At4g03230 OS=Arabidopsis thaliana OX=3702 GN=At4g03230 PE=3 SV=3	T	Signal transduction mechanisms	PREDICTED: G-type lectin S-receptor-like serine/threonine-protein kinase At4g03230 [Malus domestica]
MD02G1116300	0.075565	2.36939	3.80191	1.74466	4.11265	6.25113	0	0.25695	2.77142	0.031311	0.906552	4.82107	--	--	--	--	--	--	--	S	Function unknown	PREDICTED: uncharacterized protein At3g17950-like [Malus domestica]
MD02G1281900	0.561734	2.64976	1.8519	0	0.015761	0.074413	1.02888	0.670544	1.26682	0.073933	0.075854	0.139222	--	--	--	K01411|2.6828e-37|pxb:103945922|K01411 nardilysin [EC:3.4.24.61] | (RefSeq) nardilysin-like	[O]	Posttranslational modification, protein turnover, chaperones	Nardilysin-like OS=Arabidopsis thaliana OX=3702 GN=At1g06900 PE=2 SV=1	O	Posttranslational modification, protein turnover, chaperones	PREDICTED: nardilysin-like [Pyrus x bretschneideri]
MD17G1056400	3.28142	1.11166	1.94444	0.675712	1.93511	1.35269	0	0.220291	2.30002	0.607371	0	1.1145	--	--	--	--	--	--	--	S	Function unknown	PREDICTED: uncharacterized protein LOC103453071 [Malus domestica]
MD11G1054500	1.17463	0.924423	1.33098	0.614322	0.520744	0.791158	0.488876	0.280003	1.69278	0.321389	0.644616	0.68481	--	--	--	--	[TZ]	--	Formin-like protein 1 OS=Oryza sativa subsp. japonica OX=39947 GN=FH1 PE=2 SV=1	U	Intracellular trafficking, secretion, and vesicular transport	PREDICTED: formin-like protein 2 [Pyrus x bretschneideri]
MD10G1148300	0.131189	2.50549	0.578301	2.86646	33.6033	79.978	0.856388	0.663137	0.268384	0	2.35828	71.1743	--	--	--	--	--	--	Protein ECERIFERUM 26 OS=Arabidopsis thaliana OX=3702 GN=CER26 PE=2 SV=1	S	Function unknown	PREDICTED: protein ECERIFERUM 26-like [Malus domestica]
MD03G1037700	0.128273	3.26323	0.570376	1.70161	2.80385	3.22469	0.122521	0.014618	0.558731	0.625624	2.22076	3.46431	--	--	--	--	--	--	--	--	--	PREDICTED: uncharacterized protein LOC103958290 [Pyrus x bretschneideri]
Md/Mb root-to-leaf	Md/Mb +3 d r1	Md/Mb +3 d r2	Md/Mb +3 d r3	Md/Mb +3 d L1	Md/Mb +3 d L2	Md/Mb +3 d L3	Md/Mb -3 d r1	Md/Mb -3 d r2	Md/Mb -3 d r3	Md/Mb -3 d L1	Md/Mb -3 d L2	Md/Mb -3 d L3	COG_class	COG_class_annotation	GO_annotation	KEGG_annotation	KOG_class	KOG_class_annotation	Swissprot_annotation	eggNOG_class	eggNOG_class_annotation	nr_annotation
MD11G1109200	2109.48	1595.01	734.307	30.5118	75.7946	15.4294	679.665	1244.78	405.107	34.7779	15.0252	18.3616	--	--	Molecular Function: copper ion binding (GO:0005507);;	--	--	--	Metallothionein-like protein type 2 OS=Actinidia deliciosa OX=3627 GN=pKIWI504 PE=2 SV=1	S	Function unknown	metallothionein protein, partial [Malus domestica]
MD14G1201600	81.8464	29.5874	62.2279	32.9155	27.2459	31.2267	100.688	81.6776	69.0432	31.6193	29.5723	27.1288	[T]	Signal transduction mechanisms	--	K14165|0|mdm:103432998|K14165 atypical dual specificity phosphatase [EC:3.1.3.16 3.1.3.48] | (RefSeq) putative dual specificity protein phosphatase DSP8	[V]	Defense mechanisms	Putative dual specificity protein phosphatase DSP8 OS=Arabidopsis thaliana OX=3702 GN=DSP8 PE=2 SV=2	T	Signal transduction mechanisms	PREDICTED: putative dual specificity protein phosphatase DSP8 [Malus domestica]
MD04G1061500	64.1103	37.1181	66.5468	37.5433	56.9696	28.6579	87.4596	62.5634	58.5143	30.0303	31.1384	32.2782	--	--	--	--	--	--	--	S	Function unknown	PREDICTED: uncharacterized protein LOC103414791 [Malus domestica]
MD17G1026900	48.4849	174.068	85.1394	50.978	61.7166	40.9668	53.6059	58.2683	76.5198	47.3878	44.3752	38.4691	--	--	Molecular Function: DNA binding (GO:0003677);; Biological Process: regulation of transcription, DNA-templated (GO:0006355);;	--	--	--	Cyclic dof factor 3 OS=Arabidopsis thaliana OX=3702 GN=CDF3 PE=1 SV=2	S	Function unknown	PREDICTED: cyclic dof factor 3-like [Malus domestica]
MD03G1215500	55.5416	30.2674	69.3125	26.077	24.7964	37.4123	66.8708	60.7194	60.199	33.0667	35.9184	40.7973	[M]	Cell wall/membrane/envelope biogenesis	Molecular Function: glycogenin glucosyltransferase activity (GO:0008466);; Molecular Function: intramolecular transferase activity (GO:0016866);; Biological Process: cellulose biosynthetic process (GO:0030244);;	K13379|0|mdm:103424567|K13379 reversibly glycosylated polypeptide / UDP-arabinopyranose mutase [EC:2.4.1.- 5.4.99.30] | (RefSeq) alpha-1,4-glucan-protein synthase [UDP-forming]	--	--	Probable UDP-arabinopyranose mutase 1 OS=Pisum sativum OX=3888 GN=UPTG PE=1 SV=1	O	Posttranslational modification, protein turnover, chaperones	PREDICTED: alpha-1,4-glucan-protein synthase [UDP-forming] [Malus domestica]
MD17G1026300	41.8204	50.1782	65.7718	58.0591	50.1574	70.4821	41.1131	40.9544	43.002	74.5634	76.2888	73.5626	[J]	Translation, ribosomal structure and biogenesis	--	K02900|5.0339e-103|pxb:103965798|K02900 large subunit ribosomal protein L27Ae | (RefSeq) 60S ribosomal protein L27a-3-like	[J]	Translation, ribosomal structure and biogenesis	60S ribosomal protein L27a-3 OS=Arabidopsis thaliana OX=3702 GN=RPL27AC PE=2 SV=2	J	Translation, ribosomal structure and biogenesis	PREDICTED: 60S ribosomal protein L27a-3-like [Malus domestica]
MD17G1012600	24.2967	25.4585	32.9751	37.6004	49.095	42.1159	41.1734	30.4285	41.9707	45.3871	50.2706	54.3575	[I]	Lipid transport and metabolism	Molecular Function: fatty-acyl-CoA binding (GO:0000062);; Cellular Component: cytosol (GO:0005829);; Cellular Component: plasma membrane (GO:0005886);; Biological Process: lipid transport (GO:0006869);; Molecular Function: phosphatidylcholine binding (GO:0031210);; Biological Process: response to freezing (GO:0050826);;	K08762|7.17524e-60|pxb:103935163|K08762 diazepam-binding inhibitor (GABA receptor modulator, acyl-CoA-binding protein) | (RefSeq) acyl-CoA-binding protein	[I]	Lipid transport and metabolism	Acyl-CoA-binding protein OS=Ricinus communis OX=3988 PE=3 SV=1	I	Lipid transport and metabolism	PREDICTED: acyl-CoA-binding protein [Pyrus x bretschneideri]
MD07G1232100	29.1935	38.9418	26.4011	44.7845	41.7086	56.2735	18.5393	26.324	30.8248	43.8002	48.2214	45.297	--	--	--	--	--	--	--	S	Function unknown	PREDICTED: uncharacterized protein LOC103429531 [Malus domestica]
MD13G1216900	39.4294	15.6933	19.312	6.92258	9.07607	6.65697	25.4568	20.7251	21.346	5.34699	5.36534	5.76157	--	--	--	--	[V]	Defense mechanisms	--	S	Function unknown	PREDICTED: uncharacterized protein LOC103414955, partial [Malus domestica]
MD10G1061700	36.0014	68.9611	41.1791	6.62967	9.86274	2.71501	16.518	25.664	24.895	8.16655	7.91972	12.7259	--	--	--	--	--	--	--	S	Function unknown	PREDICTED: uncharacterized protein LOC103928190 [Pyrus x bretschneideri]
MD00G1040000	7.06245	2.92858	13.3983	22.0903	25.2983	21.7768	21.2257	18.004	24.7751	25.987	30.3678	29.0925	--	--	Cellular Component: mitochondrial proton-transporting ATP synthase complex, coupling factor F(o) (GO:0000276);; Molecular Function: hydrogen ion transmembrane transporter activity (GO:0015078);; Biological Process: ATP synthesis coupled proton transport (GO:0015986);;	--	--	--	--	S	Function unknown	PREDICTED: uncharacterized protein LOC103445151 [Malus domestica]
MD10G1185200	15.2237	17.5906	17.3431	31.7181	26.6659	34.3636	21.1769	21.6627	20.3839	34.6399	29.1052	28.7715	[J]	Translation, ribosomal structure and biogenesis	Molecular Function: structural constituent of ribosome (GO:0003735);; Biological Process: translation (GO:0006412);; Molecular Function: rRNA binding (GO:0019843);; Cellular Component: cytosolic large ribosomal subunit (GO:0022625);; Molecular Function: metal ion binding (GO:0046872);;	K02922|1.11109e-61|pxb:103957485|K02922 large subunit ribosomal protein L37e | (RefSeq) 60S ribosomal protein L37-3-like	[J]	Translation, ribosomal structure and biogenesis	60S ribosomal protein L37-1 OS=Arabidopsis thaliana OX=3702 GN=RPL37A PE=3 SV=1	J	Translation, ribosomal structure and biogenesis	PREDICTED: 60S ribosomal protein L37-3-like [Pyrus x bretschneideri]
MD02G1122500	17.6746	20.5439	14.115	95.8728	135.971	87.5176	24.593	19.0926	16.9277	68.2774	73.5929	71.1674	[J]	Translation, ribosomal structure and biogenesis	--	--	--	--	30S ribosomal protein S21, chloroplastic OS=Spinacia oleracea OX=3562 GN=rps21 PE=1 SV=2	S	Function unknown	PREDICTED: uncharacterized protein LOC103404196 [Malus domestica]
MD10G1318600	26.2487	18.8663	17.4116	9.48072	10.5161	9.96222	21.4434	20.1978	18.8371	9.61179	6.27866	8.224	--	--	--	--	--	--	--	--	--	PREDICTED: cytochrome P450 716B1-like [Malus domestica]
MD07G1294000	21.5829	3.1924	8.18596	16.3182	34.0791	29.5452	14.294	16.3564	20.1951	22.8578	17.3208	23.5711	--	--	--	K08272|0|mdm:103419592|K08272 calcium binding protein 39 | (RefSeq) putative MO25-like protein At5g47540	[S]	Function unknown	Putative MO25-like protein At5g47540 OS=Arabidopsis thaliana OX=3702 GN=At5g47540 PE=2 SV=1	S	Function unknown	PREDICTED: putative MO25-like protein At5g47540 [Malus domestica]
MD06G1217200	11.4181	5.89096	8.0972	5.91086	5.96954	8.62767	9.14792	17.2635	20.0351	9.51767	10.6774	9.88918	--	--	Molecular Function: thiol oxidase activity (GO:0016972);; Biological Process: cell redox homeostasis (GO:0045454);; Biological Process: oxidation-reduction process (GO:0055114);;	K10758|0|mdm:103423735|K10758 thiol oxidase [EC:1.8.3.2] | (RefSeq) sulfhydryl oxidase 2-like	[D]	Cell cycle control, cell division, chromosome partitioning	Sulfhydryl oxidase 2 OS=Arabidopsis thaliana OX=3702 GN=QSOX2 PE=2 SV=2	O	Posttranslational modification, protein turnover, chaperones	PREDICTED: sulfhydryl oxidase 2-like isoform X2 [Malus domestica]
MD08G1103200	10.6942	4.63331	6.48944	14.421	10.2775	18.5835	13.1688	14.7425	11.3549	21.5215	20.0294	20.3978	--	--	--	--	--	--	Tobamovirus multiplication protein 1 OS=Nicotiana tabacum OX=4097 GN=TOM1 PE=1 SV=1	S	Function unknown	PREDICTED: tobamovirus multiplication protein 1 [Malus domestica]
MD07G1000400	12.7557	9.03029	10.1653	4.82427	15.8904	3.43187	13.5628	11.6662	13.9443	6.365	2.96263	4.80589	--	--	--	--	--	--	--	--	--	PREDICTED: uncharacterized protein LOC103439886 [Malus domestica]
MD10G1191500	15.0947	27.7449	22.282	6.23914	5.72109	4.99964	12.0968	12.3902	13.5672	4.38956	4.59331	5.41033	[R]	General function prediction only	--	--	--	--	TMV resistance protein N OS=Nicotiana glutinosa OX=35889 GN=N PE=1 SV=1	S	Function unknown	PREDICTED: TMV resistance protein N-like [Pyrus x bretschneideri]
MD15G1104000	16.5245	11.9868	10.942	9.21193	10.9956	8.39204	14.3695	10.103	13.25	10.0088	11.0193	11.4415	--	--	Cellular Component: nucleus (GO:0005634);; Biological Process: regulation of transcription, DNA-templated (GO:0006355);; Biological Process: auxin-activated signaling pathway (GO:0009734);; Molecular Function: protein dimerization activity (GO:0046983);;	K14484|0|mdm:103441702|K14484 auxin-responsive protein IAA | (RefSeq) IAA2; auxin-responsive protein IAA8-like	--	--	Auxin-responsive protein IAA9 OS=Arabidopsis thaliana OX=3702 GN=IAA9 PE=1 SV=1	K	Transcription	auxin-responsive protein IAA8-like [Malus domestica]
MD00G1092500	5.87338	11.8922	4.2601	14.1983	7.24087	13.3886	10.5727	7.07651	18.833	13.1903	21.0057	24.799	--	--	--	K15285|0|mdm:103432913|K15285 solute carrier family 35, member E3 | (RefSeq) uncharacterized membrane protein At1g06890-like	[GE]	--	UDP-xylose transporter 3 OS=Arabidopsis thaliana OX=3702 GN=UXT3 PE=1 SV=1	S	Function unknown	PREDICTED: uncharacterized membrane protein At1g06890-like [Malus domestica]
MD09G1063300	18.6357	5.36308	21.116	433.788	342.656	489.634	10.4238	9.64644	13.459	434.423	561.358	749.49	[Q]	Secondary metabolites biosynthesis, transport and catabolism	Biological Process: biosynthetic process (GO:0009058);; Molecular Function: naringenin-chalcone synthase activity (GO:0016210);;	K00660|0|pxb:103959489|K00660 chalcone synthase [EC:2.3.1.74] | (RefSeq) chalcone synthase-like	--	--	Polyketide synthase 1 OS=Rubus idaeus OX=32247 GN=PKS1 PE=1 SV=1	Q	Secondary metabolites biosynthesis, transport and catabolism	chalcone synthase [Malus domestica]
MD04G1049500	10.0845	8.18242	19.5604	490.349	811.739	514.404	14.3089	7.66614	9.27609	496.814	327.409	431.499	[G]	Carbohydrate transport and metabolism	Molecular Function: fructose-bisphosphate aldolase activity (GO:0004332);; Biological Process: glycolytic process (GO:0006096);;	K01623|0|mdm:103453790|K01623 fructose-bisphosphate aldolase, class I [EC:4.1.2.13] | (RefSeq) fructose-bisphosphate aldolase 1, chloroplastic	[G]	Carbohydrate transport and metabolism	Fructose-bisphosphate aldolase 2, chloroplastic OS=Arabidopsis thaliana OX=3702 GN=FBA2 PE=1 SV=2	G	Carbohydrate transport and metabolism	PREDICTED: fructose-bisphosphate aldolase 1, chloroplastic [Malus domestica]
MD13G1028500	9.67606	13.4366	16.4896	12.3303	13.2013	15.1432	11.0288	8.37275	10.9752	16.3464	18.5685	14.8847	--	--	--	--	--	--	--	S	Function unknown	PREDICTED: uncharacterized protein LOC103445638 [Malus domestica]
MD17G1085600	8.40459	25.7429	11.7299	7.32736	10.6113	12.6222	9.06196	7.5624	10.967	16.1592	6.07475	11.1655	--	--	--	--	[K]	Transcription	Transcription elongation factor TFIIS OS=Arabidopsis thaliana OX=3702 GN=TFIIS PE=1 SV=1	S	Function unknown	PREDICTED: uncharacterized protein LOC103456146 [Malus domestica]
MD15G1290300	5.41997	3.65152	6.98446	0.328004	0.249608	0	8.10139	8.16122	9.25527	0.296951	0	0.133686	--	--	Molecular Function: DNA binding (GO:0003677);; Molecular Function: chromatin binding (GO:0003682);; Molecular Function: catalytic activity (GO:0003824);; Biological Process: metabolic process (GO:0008152);;	K09422|0|mdm:103438006|K09422 myb proto-oncogene protein, plant | (RefSeq) MYB8; transcription factor WER	[K]	Transcription	Transcription factor MYB62 OS=Arabidopsis thaliana OX=3702 GN=MYB62 PE=2 SV=1	K	Transcription	PREDICTED: transcription factor WER [Malus domestica]
MD15G1364900	10.7516	8.43352	12.9396	3.77295	4.97499	3.76705	8.93408	7.22306	9.12517	2.92068	3.42032	3.11327	--	--	--	--	[T]	Signal transduction mechanisms	Serine/threonine-protein kinase STY17 OS=Arabidopsis thaliana OX=3702 GN=STY17 PE=1 SV=1	T	Signal transduction mechanisms	PREDICTED: serine/threonine-protein kinase STY17 [Malus domestica]
MD15G1115600	14.3001	13.2234	14.8437	6.73973	13.9917	3.33525	4.64454	11.7861	6.11756	0.460017	0.975954	3.2276	--	--	--	--	--	--	Snakin-2 OS=Solanum tuberosum OX=4113 GN=SN2 PE=1 SV=1	O	Posttranslational modification, protein turnover, chaperones	PREDICTED: gibberellin-regulated protein 1-like [Malus domestica]
MD17G1156300	4.43964	2.59954	3.56546	5.93506	6.35472	3.57359	4.16932	6.08974	11.2399	4.29231	5.0136	7.59493	[G]	Carbohydrate transport and metabolism	Biological Process: glycogen biosynthetic process (GO:0005978);; Molecular Function: glucose-1-phosphate adenylyltransferase activity (GO:0008878);; Cellular Component: chloroplast (GO:0009507);; Biological Process: starch biosynthetic process (GO:0019252);;	K00975|0|mdm:103448413|K00975 glucose-1-phosphate adenylyltransferase [EC:2.7.7.27] | (RefSeq) glucose-1-phosphate adenylyltransferase large subunit 1-like	[M]	Cell wall/membrane/envelope biogenesis	Glucose-1-phosphate adenylyltransferase large subunit 1 (Fragment) OS=Solanum tuberosum OX=4113 GN=AGPS1 PE=1 SV=1	G	Carbohydrate transport and metabolism	PREDICTED: glucose-1-phosphate adenylyltransferase large subunit 1-like isoform X2 [Malus domestica]
MD12G1165800	4.19323	1.56575	1.39933	8.85637	31.4657	3.25764	3.01985	2.4133	3.37305	1.77346	0.441278	1.06636	[P]	Inorganic ion transport and metabolism	Biological Process: calcium ion transport (GO:0006816);; Molecular Function: calcium:proton antiporter activity (GO:0015369);; Cellular Component: integral component of membrane (GO:0016021);; Biological Process: transmembrane transport (GO:0055085);;	K07300|0|mdm:103450620|K07300 Ca2+:H+ antiporter | (RefSeq) vacuolar cation/proton exchanger 3-like	[P]	Inorganic ion transport and metabolism	Vacuolar cation/proton exchanger 3 OS=Arabidopsis thaliana OX=3702 GN=CAX3 PE=1 SV=1	P	Inorganic ion transport and metabolism	PREDICTED: vacuolar cation/proton exchanger 3-like [Malus domestica]
MD11G1244700	7.19564	8.08189	7.39575	8.87012	6.11574	7.62459	7.38797	6.86928	7.00139	10.5769	12.5788	10.1241	[L]	Replication, recombination and repair	--	K10706|0|mdm:103439081|K10706 senataxin [EC:3.6.4.-] | (RefSeq) uncharacterized LOC103439081	[A]	RNA processing and modification	Probable helicase MAGATAMA 3 OS=Arabidopsis thaliana OX=3702 GN=MAA3 PE=2 SV=1	L	Replication, recombination and repair	PREDICTED: uncharacterized protein LOC103439081 [Malus domestica]
MD02G1312900	5.36843	13.751	4.61502	8.95565	8.55058	12.3602	6.37985	7.70585	6.47142	13.7569	9.79568	8.27001	--	--	--	--	--	--	Autophagy-related protein 11 OS=Arabidopsis thaliana OX=3702 GN=ATG11 PE=1 SV=1	S	Function unknown	PREDICTED: autophagy-related protein 11 [Malus domestica]
MD08G1128400	6.75224	6.04505	11.1973	4.39481	5.82765	7.34223	7.26414	5.62025	6.2983	7.86393	6.57592	10.3479	--	--	--	--	[O]	Posttranslational modification, protein turnover, chaperones	Ubiquitin carboxyl-terminal hydrolase 12 OS=Arabidopsis thaliana OX=3702 GN=UBP12 PE=1 SV=2	O	Posttranslational modification, protein turnover, chaperones	PREDICTED: MATH domain and coiled-coil domain-containing protein At3g58270-like [Malus domestica]
MD11G1034800	5.32272	3.74857	3.40245	0.467874	0.162019	4.51867	6.2308	7.24411	5.58419	2.27476	5.59695	2.41589	--	--	--	--	[U]	Intracellular trafficking, secretion, and vesicular transport	Phosphate transporter PHO1 OS=Arabidopsis thaliana OX=3702 GN=PHO1 PE=1 SV=1	T	Signal transduction mechanisms	PREDICTED: phosphate transporter PHO1-like [Pyrus x bretschneideri]
MD07G1051300	5.28371	13.6204	14.3501	17.1104	16.422	14.2698	6.99013	4.80794	6.10801	14.8825	21.5743	17.4697	--	--	--	K03109|5.95125e-72|mdm:103417112|K03109 signal recognition particle subunit SRP9 | (RefSeq) signal recognition particle 9 kDa protein	[U]	Intracellular trafficking, secretion, and vesicular transport	Signal recognition particle 9 kDa protein OS=Arabidopsis thaliana OX=3702 GN=SRP9 PE=3 SV=1	U	Intracellular trafficking, secretion, and vesicular transport	PREDICTED: signal recognition particle 9 kDa protein [Malus domestica]
MD17G1123700	4.22947	5.21311	3.63418	7.53394	7.69161	7.21411	5.05887	6.31138	6.27133	7.43429	8.29643	9.10613	[R]	General function prediction only	--	--	[U]	Intracellular trafficking, secretion, and vesicular transport	Ras-related protein RABA5b OS=Arabidopsis thaliana OX=3702 GN=RABA5B PE=1 SV=1	S	Function unknown	PREDICTED: ras-related protein RABA5b-like [Malus domestica]
MD03G1187000	6.19236	8.26722	4.3304	6.37494	5.22373	5.75424	5.98711	5.2157	5.84507	5.3351	6.49675	6.02312	--	--	Cellular Component: cytoplasm (GO:0005737);; Biological Process: proteolysis (GO:0006508);; Biological Process: autophagy (GO:0006914);; Molecular Function: cysteine-type peptidase activity (GO:0008234);; Biological Process: protein transport (GO:0015031);;	K08342|0|mdm:103409907|K08342 cysteine protease ATG4 [EC:3.4.22.-] | (RefSeq) cysteine protease ATG4-like	[ZU]	--	Cysteine protease ATG4 OS=Medicago truncatula OX=3880 GN=ATG4 PE=3 SV=1	O	Posttranslational modification, protein turnover, chaperones	PREDICTED: cysteine protease ATG4-like isoform X2 [Malus domestica]
MD10G1030700	7.15136	3.70465	3.90278	7.39715	6.74129	6.42641	6.17187	4.57754	6.00767	4.42296	5.45911	2.65836	--	--	--	--	[S]	Function unknown	--	S	Function unknown	PREDICTED: uncharacterized protein LOC103441128 [Malus domestica]
MD02G1054900	3.63533	0.599759	3.72942	5.79159	3.98029	8.08764	4.41526	6.8016	4.7874	9.73819	7.9663	7.48086	--	--	--	--	[O]	Posttranslational modification, protein turnover, chaperones	Probable E3 ubiquitin-protein ligase HIP1 OS=Oryza sativa subsp. japonica OX=39947 GN=HIP1 PE=1 SV=2	O	Posttranslational modification, protein turnover, chaperones	PREDICTED: E3 ubiquitin-protein ligase RNF6-like [Malus domestica]
MD09G1014300	7.45329	1.85263	1.25754	16.2074	13.7406	22.4442	2.45696	2.59049	8.20151	12.8954	11.6062	22.3828	[QV]	--	--	--	[Q]	Secondary metabolites biosynthesis, transport and catabolism	Cytochrome P450 81E8 OS=Medicago truncatula OX=3880 GN=CYP81E8 PE=2 SV=1	Q	Secondary metabolites biosynthesis, transport and catabolism	PREDICTED: cytochrome P450 81E8-like isoform X1 [Pyrus x bretschneideri]
MD16G1007000	4.57491	2.54915	2.31586	2.75589	2.39332	2.74055	4.56083	3.6821	4.82268	2.3911	2.97118	3.31211	--	--	Cellular Component: mitochondrial inner membrane (GO:0005743);; Biological Process: glycolytic process (GO:0006096);; Biological Process: protein targeting to vacuole (GO:0006623);; Biological Process: mitochondrial pyruvate transport (GO:0006850);; Biological Process: aerobic respiration (GO:0009060);; Biological Process: response to cadmium ion (GO:0046686);;	--	[S]	Function unknown	Mitochondrial pyruvate carrier 4 OS=Arabidopsis thaliana OX=3702 GN=MPC4 PE=3 SV=1	S	Function unknown	PREDICTED: mitochondrial pyruvate carrier 4-like [Malus domestica]
MD15G1061800	6.48407	4.72669	3.50323	4.16197	5.54663	3.09488	4.77541	4.00414	3.33497	5.5833	3.69633	3.5587	[S]	Function unknown	--	--	--	--	Protein LIKE COV 2 OS=Arabidopsis thaliana OX=3702 GN=LCV2 PE=2 SV=1	S	Function unknown	PREDICTED: protein LIKE COV 2-like [Malus domestica]
MD03G1227600	1.92974	0.309339	1.72845	1.19749	0	0.829107	2.87111	2.95974	4.86408	1.43264	0.785169	0.41061	--	--	--	--	--	--	Cyclic phosphodiesterase OS=Arabidopsis thaliana OX=3702 GN=At4g18930 PE=1 SV=1	S	Function unknown	PREDICTED: F-box/kelch-repeat protein At3g06240-like isoform X1 [Pyrus x bretschneideri]
MD11G1245600	3.53627	2.00366	2.47583	0.09736	0.185833	0.328636	3.36534	3.64955	3.17996	0.039383	0.586556	0.350597	--	--	--	--	--	--	--	S	Function unknown	PREDICTED: uncharacterized protein LOC103403429 [Malus domestica]
MD02G1023800	6.33221	2.25874	3.58067	13.6933	26.9263	14.2772	3.1474	2.55071	3.4356	17.8419	13.5454	12.0937	[J]	Translation, ribosomal structure and biogenesis	Molecular Function: RNA binding (GO:0003723);; Molecular Function: structural constituent of ribosome (GO:0003735);; Cellular Component: ribosome (GO:0005840);; Biological Process: translation (GO:0006412);;	K02946|4.1754e-119|mdm:103418971|K02946 small subunit ribosomal protein S10 | (RefSeq) 30S ribosomal protein S10, chloroplastic-like	[J]	Translation, ribosomal structure and biogenesis	30S ribosomal protein S10, chloroplastic OS=Mesembryanthemum crystallinum OX=3544 GN=RPS10 PE=2 SV=1	J	Translation, ribosomal structure and biogenesis	PREDICTED: 30S ribosomal protein S10, chloroplastic-like [Malus domestica]
MD03G1169200	2.03989	1.53702	2.4467	3.23268	3.43043	3.25781	2.47863	2.70735	3.68527	3.07287	3.38201	2.24249	--	--	--	--	[T]	Signal transduction mechanisms	Oligopeptide transporter 5 OS=Arabidopsis thaliana OX=3702 GN=OPT5 PE=2 SV=1	S	Function unknown	PREDICTED: oligopeptide transporter 1-like [Pyrus x bretschneideri]
MD12G1080400	3.25733	2.94721	2.2169	2.39437	3.49564	3.68699	3.47574	1.93146	3.33628	2.30281	0.777984	1.38709	--	--	--	--	[R]	General function prediction only	--	S	Function unknown	PREDICTED: uncharacterized protein LOC103413183 [Malus domestica]
MD05G1163800	5.91204	7.36353	3.35411	8.43765	18.8946	7.89181	3.09083	2.47906	3.11409	7.95238	8.15334	9.65043	[T]	Signal transduction mechanisms	Molecular Function: protein serine/threonine kinase activity (GO:0004674);; Molecular Function: transmembrane receptor protein tyrosine kinase activity (GO:0004714);; Molecular Function: ATP binding (GO:0005524);; Biological Process: protein phosphorylation (GO:0006468);; Cellular Component: integral component of membrane (GO:0016021);;	--	--	--	LRR receptor-like serine/threonine-protein kinase FEI 1 OS=Arabidopsis thaliana OX=3702 GN=FEI1 PE=1 SV=1	T	Signal transduction mechanisms	PREDICTED: LRR receptor-like serine/threonine-protein kinase FEI 2 [Malus domestica]
MD11G1080400	4.40544	2.00445	4.27275	3.34375	11.1954	1.06474	3.03638	2.22397	2.76791	0.104516	0.0309	0	[IQR]	--	--	K08081|0|pxb:103964709|K08081 tropinone reductase I [EC:1.1.1.206] | (RefSeq) tropinone reductase homolog At1g07440-like	[R]	General function prediction only	Tropinone reductase homolog At1g07440 OS=Arabidopsis thaliana OX=3702 GN=At1g07440 PE=1 SV=1	S	Function unknown	PREDICTED: tropinone reductase homolog At1g07440-like isoform X2 [Pyrus x bretschneideri]
MD11G1012200	2.26069	2.6371	6.22555	6.07221	3.18351	5.53889	1.98738	3.13072	2.38074	8.85363	11.2771	9.67991	[O]	Posttranslational modification, protein turnover, chaperones	--	--	[O]	Posttranslational modification, protein turnover, chaperones	DnaJ protein P58IPK homolog A OS=Oryza sativa subsp. japonica OX=39947 GN=P58A PE=1 SV=1	O	Posttranslational modification, protein turnover, chaperones	PREDICTED: dnaJ homolog subfamily B member 7-like isoform X1 [Malus domestica]
MD01G1137500	0.034287	2.61023	0.174507	2.16888	4.27679	2.94611	0.129621	2.5937	4.64288	1.99031	1.97093	1.50914	--	--	--	--	--	--	--	--	--	PREDICTED: uncharacterized protein LOC103958290 [Pyrus x bretschneideri]
MD12G1002500	2.28089	0.64535	1.77228	8.09103	10.7277	4.3132	2.01371	2.01061	3.08101	6.63672	11.0465	11.4751	--	--	Molecular Function: zinc ion binding (GO:0008270);;	--	--	--	--	S	Function unknown	PREDICTED: uncharacterized protein LOC103420049 isoform X1 [Malus domestica]
MD16G1141000	1.4077	0.547878	0.633757	2.24752	6.50399	3.04722	3.05379	2.60012	1.19103	3.377	2.24986	3.87633	--	--	--	--	--	--	--	S	Function unknown	PREDICTED: uncharacterized protein At3g17950-like [Malus domestica]
MD10G1091000	1.71645	1.56759	7.05188	14.4291	17.5693	12.4326	2.01149	3.1807	1.24595	12.1068	11.11	14.1847	[M]	Cell wall/membrane/envelope biogenesis	Cellular Component: cytoplasm (GO:0005737);; Molecular Function: 3-deoxy-manno-octulosonate cytidylyltransferase activity (GO:0008690);; Biological Process: lipopolysaccharide biosynthetic process (GO:0009103);;	K00979|0|mdm:103413289|K00979 3-deoxy-manno-octulosonate cytidylyltransferase (CMP-KDO synthetase) [EC:2.7.7.38] | (RefSeq) 3-deoxy-manno-octulosonate cytidylyltransferase, mitochondrial	--	--	3-deoxy-manno-octulosonate cytidylyltransferase, mitochondrial OS=Arabidopsis thaliana OX=3702 GN=KDSB PE=1 SV=1	M	Cell wall/membrane/envelope biogenesis	PREDICTED: 3-deoxy-manno-octulosonate cytidylyltransferase, mitochondrial-like [Malus domestica]
MD13G1285100	6.06073	96.3226	3.81074	48.6074	37.6366	51.8391	1.24072	2.12985	2.52755	57.042	61.17	57.6025	[C]	Energy production and conversion	--	--	--	--	--	S	Function unknown	PREDICTED: uncharacterized protein LOC103404273 [Malus domestica]
MD02G1278900	2.50911	3.12737	1.72007	1.56161	2.66717	2.25485	2.11414	1.86611	1.33249	2.47275	2.31266	1.82221	--	--	--	--	--	--	TITAN-like protein OS=Arabidopsis thaliana OX=3702 GN=TTL PE=2 SV=1	S	Function unknown	PREDICTED: TITAN-like protein isoform X2 [Malus domestica]
MD05G1281100	1.89054	2.54908	1.28828	6.18215	5.33671	4.9738	1.26822	2.21732	1.37802	5.54083	5.22919	6.04839	[O]	Posttranslational modification, protein turnover, chaperones	Molecular Function: metalloendopeptidase activity (GO:0004222);; Molecular Function: ATP binding (GO:0005524);; Biological Process: proteolysis (GO:0006508);; Molecular Function: zinc ion binding (GO:0008270);; Cellular Component: integral component of membrane (GO:0016021);; Molecular Function: nucleoside-triphosphatase activity (GO:0017111);; Biological Process: protein catabolic process (GO:00…	K03798|0|pxb:103938584|K03798 cell division protease FtsH [EC:3.4.24.-] | (RefSeq) ATP-dependent zinc metalloprotease FTSH 9, chloroplastic-like	[O]	Posttranslational modification, protein turnover, chaperones	ATP-dependent zinc metalloprotease FTSH 9, chloroplastic OS=Arabidopsis thaliana OX=3702 GN=FTSH9 PE=2 SV=1	O	Posttranslational modification, protein turnover, chaperones	PREDICTED: ATP-dependent zinc metalloprotease FTSH 9, chloroplastic-like [Pyrus x bretschneideri]
MD17G1015100	2.1256	1.74743	1.16439	2.00785	1.79254	0.848998	1.255	1.33849	2.18314	0.983199	0.289076	0.877238	--	--	--	--	[GC]	--	UDP-glycosyltransferase 87A1 OS=Arabidopsis thaliana OX=3702 GN=UGT87A1 PE=2 SV=1	S	Function unknown	PREDICTED: UDP-glycosyltransferase 87A1-like isoform X2 [Pyrus x bretschneideri]
MD04G1093600	2.10776	1.60967	2.25954	3.2126	3.10008	3.5764	1.2167	1.20649	1.42766	2.88374	2.04699	2.55858	[M]	Cell wall/membrane/envelope biogenesis	--	--	[R]	General function prediction only	F-box/kelch-repeat protein At1g16250 OS=Arabidopsis thaliana OX=3702 GN=At1g16250 PE=2 SV=1	S	Function unknown	PREDICTED: F-box/kelch-repeat protein At1g16250 [Malus domestica]
MD15G1161200	1.46399	4.32785	14.0114	2.39641	2.76959	4.08929	1.48949	1.19586	0.765749	1.96931	2.01718	2.62315	--	--	--	--	--	--	Tobamovirus multiplication protein 3 OS=Arabidopsis thaliana OX=3702 GN=TOM3 PE=1 SV=2	S	Function unknown	PREDICTED: tobamovirus multiplication protein 3-like [Malus domestica]
MD14G1223300	1.95494	0.209502	1.92544	3.71843	4.00839	3.02857	1.214	0.713147	1.46984	3.72288	3.22403	4.16925	--	--	--	K08472|0|mdm:103448665|K08472 mlo protein | (RefSeq) MLO-like protein 11	--	--	MLO-like protein 11 OS=Arabidopsis thaliana OX=3702 GN=MLO11 PE=2 SV=1	D	Cell cycle control, cell division, chromosome partitioning	PREDICTED: MLO-like protein 11 isoform X2 [Malus domestica]
MD03G1044200	1.97723	4.71841	1.37069	2.62267	3.02612	2.8614	1.42611	1.0999	0.797957	3.53958	4.35738	7.06856	[HR]	--	--	--	--	--	Methylesterase 17 OS=Arabidopsis thaliana OX=3702 GN=MES17 PE=1 SV=1	S	Function unknown	PREDICTED: methylesterase 17-like [Malus domestica]
MD12G1164100	1.25605	1.10738	0.143204	1.82077	3.16927	1.60742	0.915077	0.929263	1.15741	2.41029	2.06536	2.63709	--	--	--	--	--	--	--	S	Function unknown	PREDICTED: uncharacterized protein LOC103424646 [Malus domestica]
MD03G1163300	1.23867	1.73678	0.58909	0.7369	1.02975	0	0.807203	1.06345	0.967384	0.519002	0.665283	1.37331	--	--	--	--	--	--	--	S	Function unknown	PREDICTED: uncharacterized protein LOC103453071 [Malus domestica]
MD10G1278900	3.31932	2.79159	2.44771	7.75585	7.6928	9.53431	0.549414	0.797093	1.0157	9.22642	2.94991	9.6455	[K]	Transcription	Molecular Function: nucleic acid binding (GO:0003676);; Biological Process: regulation of transcription, DNA-templated (GO:0006355);;	K03145|0|mdm:103432931|K03145 transcription elongation factor S-II | (RefSeq) transcription elongation factor TFIIS-like	[K]	Transcription	Transcription elongation factor TFIIS OS=Arabidopsis thaliana OX=3702 GN=TFIIS PE=1 SV=1	K	Transcription	PREDICTED: transcription elongation factor TFIIS-like [Malus domestica]
MD08G1133200	0.900863	0.32258	0.163609	1.70779	2.94359	2.49994	1.0622	0.59995	0.69211	1.9318	2.44588	3.20204	--	--	--	--	--	--	--	S	Function unknown	PREDICTED: uncharacterized protein LOC103944087 [Pyrus x bretschneideri]
MD02G1091400	1.71732	3.18934	1.22117	2.88716	2.71775	4.01392	0.306193	0.819572	1.04025	4.45395	1.44151	2.14008	--	--	--	--	[U]	Intracellular trafficking, secretion, and vesicular transport	Transmembrane 9 superfamily member 12 OS=Arabidopsis thaliana OX=3702 GN=TMN12 PE=2 SV=1	S	Function unknown	PREDICTED: transmembrane 9 superfamily member 12-like [Malus domestica]
MD04G1184900	1.65735	4.03398	0.090371	0	0	0	0.723659	0.929059	0.432104	0	0.084107	0	[H]	Coenzyme transport and metabolism	Molecular Function: methionine adenosyltransferase activity (GO:0004478);; Molecular Function: ATP binding (GO:0005524);; Cellular Component: cytoplasm (GO:0005737);; Biological Process: S-adenosylmethionine biosynthetic process (GO:0006556);; Biological Process: one-carbon metabolic process (GO:0006730);; Molecular Function: metal ion binding (GO:0046872);;	K00789|2.63102e-69|mdm:103436288|K00789 S-adenosylmethionine synthetase [EC:2.5.1.6] | (RefSeq) S-adenosylmethionine synthase 4-like	[H]	Coenzyme transport and metabolism	S-adenosylmethionine synthase 2 OS=Catharanthus roseus OX=4058 GN=SAMS2 PE=1 SV=1	H	Coenzyme transport and metabolism	PREDICTED: S-adenosylmethionine synthase 4-like [Malus domestica]
MD08G1216300	0.817669	0.396094	1.73347	3.47968	6.24665	1.93994	1.24691	0.112548	0.576169	3.53924	3.81308	3.41075	--	--	--	--	--	--	--	S	Function unknown	PREDICTED: uncharacterized protein LOC103417282 isoform X2 [Malus domestica]
MD09G1277500	0.778362	0.516859	0	1.47076	3.30433	0.904999	0.273109	0.206464	1.18863	1.5765	1.87697	2.72259	--	--	Molecular Function: protein serine/threonine kinase activity (GO:0004674);; Molecular Function: ATP binding (GO:0005524);; Biological Process: protein phosphorylation (GO:0006468);;	K04733|0|mdm:103405862|K04733 interleukin-1 receptor-associated kinase 4 [EC:2.7.11.1] | (RefSeq) serine/threonine-protein kinase CDL1	[T]	Signal transduction mechanisms	Probable serine/threonine-protein kinase PBL26 OS=Arabidopsis thaliana OX=3702 GN=PBL26 PE=2 SV=1	T	Signal transduction mechanisms	PREDICTED: serine/threonine-protein kinase CDL1 [Malus domestica]
MD09G1032400	0.278198	0.542352	11.8051	1.76223	1.61618	1.97507	0.724848	0.521798	0.358579	1.4604	1.94781	1.35426	--	--	--	K15326|0|mdm:103423269|K15326 tRNA-splicing endonuclease subunit Sen54 | (RefSeq) uncharacterized LOC103423269	[J]	Translation, ribosomal structure and biogenesis	--	S	Function unknown	PREDICTED: uncharacterized protein LOC103423269 [Malus domestica]
MD17G1044100	1.46206	0.464409	1.16676	1.26573	1.22904	0.711462	0.617685	0.399126	0.513955	1.18656	0.74856	0.865929	[F]	Nucleotide transport and metabolism	--	K00939|8.49771e-82|mdm:103404205|K00939 adenylate kinase [EC:2.7.4.3] | (RefSeq) probable adenylate kinase 7, mitochondrial	[F]	Nucleotide transport and metabolism	Probable adenylate kinase 7, mitochondrial OS=Arabidopsis thaliana OX=3702 GN=At3g01820 PE=2 SV=1	F	Nucleotide transport and metabolism	PREDICTED: probable adenylate kinase 7, mitochondrial [Malus domestica]
MD08G1079800	0.95746	2.01139	1.39917	3.70852	5.48351	3.36939	0.014922	0.786977	0.670111	4.44447	4.0561	4.80192	[HG]	--	--	--	--	--	--	S	Function unknown	PREDICTED: uncharacterized protein YNL011C [Malus domestica]
MD15G1065400	0.228906	0.697757	2.41748	43.6965	14.5262	36.7439	0.556315	0.582142	0.292329	31.3329	33.433	34.7157	--	--	--	K00901|1.81752e-153|mdm:103404756|K00901 diacylglycerol kinase (ATP) [EC:2.7.1.107] | (RefSeq) diacylglycerol kinase 5	[IT]	--	Diacylglycerol kinase 5 OS=Arabidopsis thaliana OX=3702 GN=DGK5 PE=2 SV=1	I	Lipid transport and metabolism	PREDICTED: LOW QUALITY PROTEIN: diacylglycerol kinase 5 [Malus domestica]
MD13G1069500	0	0	0.351291	2.68538	4.06059	1.56067	0.592637	0.508217	0.187316	1.41815	0.049317	1.77384	[L]	Replication, recombination and repair	Cellular Component: ubiquitin ligase complex (GO:0000151);; Molecular Function: ubiquitin-protein transferase activity (GO:0004842);; Biological Process: protein ubiquitination (GO:0016567);;	--	--	--	U-box domain-containing protein 30 OS=Arabidopsis thaliana OX=3702 GN=PUB30 PE=2 SV=1	O	Posttranslational modification, protein turnover, chaperones	PREDICTED: U-box domain-containing protein 30-like [Malus domestica]
MD05G1066600	2.26468	6.89146	0.157032	2.73917	2.04709	2.12185	0.100119	0.404551	0.602206	2.30666	3.49122	2.56168	[K]	Transcription	--	--	--	--	TMV resistance protein N OS=Nicotiana glutinosa OX=35889 GN=N PE=1 SV=1	S	Function unknown	PREDICTED: protein SUPPRESSOR OF npr1-1, CONSTITUTIVE 1-like [Malus domestica]
MD02G1297500	0.563058	0.177796	0.071586	1.65056	3.58704	1.18586	0.101062	0.552846	0.452147	2.34539	1.43366	1.09203	--	--	--	K14500|1.26266e-18|tcc:TCM_034358|K14500 BR-signaling kinase [EC:2.7.11.1] | (RefSeq) BR-signaling kinase 1	--	--	Serine/threonine-protein kinase BSK1 OS=Arabidopsis thaliana OX=3702 GN=BSK1 PE=1 SV=1	T	Signal transduction mechanisms	kinase family protein [Dorcoceras hygrometricum]
MD09G1141900	0.783081	0.571681	0.556419	0.750562	2.04625	0.953736	0.180979	0.154396	0.717464	2.18463	1.47973	2.53157	--	--	--	--	--	--	--	S	Function unknown	PREDICTED: uncharacterized protein LOC103443098 isoform X2 [Malus domestica]
MD15G1419800	0	0.335798	0	0.207229	1.03402	0.742543	0.330983	0.698451	0	0.239399	0.275669	0.439678	[T]	Signal transduction mechanisms	--	--	--	--	Protein STRUBBELIG-RECEPTOR FAMILY 8 OS=Arabidopsis thaliana OX=3702 GN=SRF8 PE=2 SV=1	T	Signal transduction mechanisms	PREDICTED: protein STRUBBELIG-RECEPTOR FAMILY 8-like [Malus domestica]
MD15G1220700	0.167894	0.163943	0.014038	5.9229	3.12237	11.649	0.239229	0.131463	0.516643	15.1576	19.4875	14.077	--	--	--	--	--	--	--	S	Function unknown	PREDICTED: uncharacterized protein LOC103431394 [Malus domestica]
MD14G1002400	0.214448	0.628542	0.025867	7.13308	15.2468	4.24085	0.117979	0.419605	0.1627	2.66953	1.87363	2.83167	[HT]	--	--	K08869|0|mdm:103427683|K08869 aarF domain-containing kinase | (RefSeq) uncharacterized protein slr0889-like	[R]	General function prediction only	Protein ACTIVITY OF BC1 COMPLEX KINASE 8, chloroplastic OS=Arabidopsis thaliana OX=3702 GN=ABC1K8 PE=2 SV=1	S	Function unknown	PREDICTED: uncharacterized protein slr0889-like [Malus domestica]
MD08G1042700	0.283005	0.633085	1.06953	2.02771	1.19969	1.90227	0.33186	0	0.296533	1.92345	2.14694	2.03884	--	--	--	--	--	--	AT-rich interactive domain-containing protein 1 OS=Arabidopsis thaliana OX=3702 GN=ARID1 PE=2 SV=1	K	Transcription	PREDICTED: AT-rich interactive domain-containing protein 1-like isoform X1 [Malus domestica]
MD04G1150900	0.519077	1.32926	0.610134	3.31773	6.23925	1.7891	0.11035	0.175074	0.182488	1.01115	1.57656	1.09546	--	--	Molecular Function: DNA binding (GO:0003677);; Molecular Function: chromatin binding (GO:0003682);;	K09422|0|pxb:103955839|K09422 myb proto-oncogene protein, plant | (RefSeq) transcription factor MYB86	[K]	Transcription	Transcription factor MYB61 OS=Arabidopsis thaliana OX=3702 GN=MYB61 PE=2 SV=1	K	Transcription	MYB domain class transcription factor [Malus domestica]
MD02G1057600	0.462202	0.420125	0.238968	4.46255	5.37274	3.59808	0.039835	0.079791	0.159093	4.87842	4.82378	4.22605	--	--	--	--	[R]	General function prediction only	Topless-related protein 4 OS=Arabidopsis thaliana OX=3702 GN=TPR4 PE=1 SV=2	S	Function unknown	PREDICTED: topless-related protein 4-like isoform X2 [Malus domestica]
MD07G1206500	0.022629	0.082693	0.052465	3.4596	2.90285	4.50364	0.010321	0.020315	0.052874	2.72218	2.73559	2.90867	--	--	--	--	--	--	--	S	Function unknown	PREDICTED: vicilin-like seed storage protein At2g18540 isoform X1 [Pyrus x bretschneideri]
MD09G1074200	0.126656	0.114299	0.073195	1.6644	2.02587	1.15024	0	0.029831	0.047777	2.14708	1.75693	1.58744	--	--	Molecular Function: kinase activity (GO:0016301);; Biological Process: phosphorylation (GO:0016310);;	--	--	--	--	T	Signal transduction mechanisms	PREDICTED: uncharacterized protein LOC103958872 isoform X1 [Pyrus x bretschneideri]
MD10G1019400	0	2.50046	0	21.3606	34.421	20.3326	0	0.013925	0	20.5683	15.1256	17.4275	[R]	General function prediction only	Molecular Function: nucleotide binding (GO:0000166);; Molecular Function: 3-beta-hydroxy-delta5-steroid dehydrogenase activity (GO:0003854);; Biological Process: steroid biosynthetic process (GO:0006694);; Cellular Component: chloroplast stroma (GO:0009570);; Cellular Component: chloroplast envelope (GO:0009941);; Biological Process: oxidation-reduction process (GO:0055114);;	--	[G]	Carbohydrate transport and metabolism	Sanguinarine reductase OS=Eschscholzia californica OX=3467 GN=SARED1 PE=1 SV=1	GM	--	PREDICTED: sanguinarine reductase-like [Pyrus x bretschneideri]
MD11G1100200	0.278723	0.961505	0.031765	0.360816	1.13751	1.45461	0	0	0	0.934582	0.220643	1.24298	--	--	--	--	--	--	Protein FIP1 OS=Arabidopsis thaliana OX=3702 GN=FIP1 PE=1 SV=1	S	Function unknown	PREDICTED: uncharacterized protein LOC103929720 [Pyrus x bretschneideri]
MD16G1000600	0	0.300916	0.330849	2.29066	2.15929	8.18934	0	0	0	13.0376	12.3061	6.44409	[Q]	Secondary metabolites biosynthesis, transport and catabolism	--	--	[QR]	--	1-aminocyclopropane-1-carboxylate oxidase homolog 1 OS=Arabidopsis thaliana OX=3702 GN=At1g06620 PE=2 SV=1	S	Function unknown	PREDICTED: 1-aminocyclopropane-1-carboxylate oxidase homolog 3-like [Malus domestica]
MD05G1331100	0	0.113077	0	4.88122	6.12931	1.99927	0	0	0	5.40344	4.97174	5.28653	[I]	Lipid transport and metabolism	Molecular Function: carboxylic ester hydrolase activity (GO:0004091);; Biological Process: metabolic process (GO:0008152);; Molecular Function: retinyl-palmitate esterase activity (GO:0050253);; Molecular Function: methyl indole-3-acetate esterase activity (GO:0080030);; Molecular Function: methyl salicylate esterase activity (GO:0080031);; Molecular Function: methyl jasmonate esterase activity (…	--	[V]	Defense mechanisms	Probable carboxylesterase 7 OS=Arabidopsis thaliana OX=3702 GN=CXE7 PE=2 SV=1	I	Lipid transport and metabolism	PREDICTED: probable carboxylesterase 7 [Malus domestica]
Md/Mx leaf-to-root	Md/Mx +3 d r1	Md/Mx +3 d r2	Md/Mx +3 d r3	Md/Mx +3 d L1	Md/Mx +3 d L2	Md/Mx +3 d L3	Md/Mx -3 d r1	Md/Mx -3 d r2	Md/Mx -3 d r3	Md/Mx -3 d L1	Md/Mx -3 d L2	Md/Mx -3 d L3	COG_class	COG_class_annotation	GO_annotation	KEGG_annotation	KOG_class	KOG_class_annotation	Swissprot_annotation	eggNOG_class	eggNOG_class_annotation	nr_annotation
MD14G1175600	84.5267	58.9896	57.2986	806.321	300.158	100.681	93.1497	165.531	51.9242	1345.25	802.195	135.417	[VI]	--	Molecular Function: glutathione peroxidase activity (GO:0004602);; Cellular Component: plasma membrane (GO:0005886);; Biological Process: response to oxidative stress (GO:0006979);; Cellular Component: chloroplast (GO:0009507);; Biological Process: response to salt stress (GO:0009651);; Biological Process: response to cadmium ion (GO:0046686);; Biological Process: oxidation-reduction process (GO:…	K00432|4.94922e-166|pxb:103932090|K00432 glutathione peroxidase [EC:1.11.1.9] | (RefSeq) probable phospholipid hydroperoxide glutathione peroxidase	[O]	Posttranslational modification, protein turnover, chaperones	Probable phospholipid hydroperoxide glutathione peroxidase 6, mitochondrial OS=Arabidopsis thaliana OX=3702 GN=GPX6 PE=2 SV=2	O	Posttranslational modification, protein turnover, chaperones	PREDICTED: probable phospholipid hydroperoxide glutathione peroxidase [Pyrus x bretschneideri]
MD02G1007800	4.68794	10.4256	2.32574	616.802	1427.64	1990.28	14.0976	11.9923	1.81325	136.786	493.701	1922.99	[G]	Carbohydrate transport and metabolism	Molecular Function: ATP binding (GO:0005524);;	--	[O]	Posttranslational modification, protein turnover, chaperones	Ribulose bisphosphate carboxylase/oxygenase activase 1, chloroplastic OS=Larrea tridentata OX=66636 GN=RCA1 PE=1 SV=1	O	Posttranslational modification, protein turnover, chaperones	PREDICTED: ribulose bisphosphate carboxylase/oxygenase activase, chloroplastic [Malus domestica]
MD11G1070800	223.513	195.849	106.937	170.43	109.104	15.3086	270.359	378.902	783.028	279.774	121.356	44.4541	[E]	Amino acid transport and metabolism	Molecular Function: asparagine synthase (glutamine-hydrolyzing) activity (GO:0004066);; Molecular Function: ATP binding (GO:0005524);; Biological Process: cellular amino acid catabolic process (GO:0009063);; Biological Process: response to absence of light (GO:0009646);; Biological Process: L-asparagine biosynthetic process (GO:0070981);;	K01953|0|mdm:103447373|K01953 asparagine synthase (glutamine-hydrolysing) [EC:6.3.5.4] | (RefSeq) asparagine synthetase [glutamine-hydrolyzing] 1	[E]	Amino acid transport and metabolism	Asparagine synthetase [glutamine-hydrolyzing] 1 OS=Lotus japonicus OX=34305 GN=AS1 PE=2 SV=2	E	Amino acid transport and metabolism	PREDICTED: asparagine synthetase [glutamine-hydrolyzing] 1 [Malus domestica]
MD14G1052100	113.231	154.344	122.392	82.2452	53.5458	31.7708	76.5722	104.774	142.522	107.873	89.2144	53.7222	[J]	Translation, ribosomal structure and biogenesis	Molecular Function: structural constituent of ribosome (GO:0003735);; Cellular Component: nucleolus (GO:0005730);; Cellular Component: mitochondrion (GO:0005739);; Biological Process: translation (GO:0006412);; Cellular Component: chloroplast (GO:0009507);; Cellular Component: cytosolic large ribosomal subunit (GO:0022625);;	K02889|1.40827e-116|mdm:103430899|K02889 large subunit ribosomal protein L21e | (RefSeq) 60S ribosomal protein L21-1	[J]	Translation, ribosomal structure and biogenesis	60S ribosomal protein L21-1 OS=Arabidopsis thaliana OX=3702 GN=RPL21A PE=2 SV=2	J	Translation, ribosomal structure and biogenesis	PREDICTED: 60S ribosomal protein L21-1 [Malus domestica]
MD13G1107100	23.6876	45.9685	92.3928	75.0614	15.6329	7.86829	15.3491	21.6795	119.597	57.4621	61.5158	19.0661	[C]	Energy production and conversion	Biological Process: tricarboxylic acid cycle (GO:0006099);; Molecular Function: phosphoenolpyruvate carboxylase activity (GO:0008964);; Biological Process: carbon fixation (GO:0015977);; Molecular Function: 2-alkenal reductase [NAD(P)] activity (GO:0032440);;	K01595|0|mdm:103448757|K01595 phosphoenolpyruvate carboxylase [EC:4.1.1.31] | (RefSeq) phosphoenolpyruvate carboxylase, housekeeping isozyme	--	--	Phosphoenolpyruvate carboxylase, housekeeping isozyme OS=Glycine max OX=3847 GN=PPC16 PE=2 SV=1	C	Energy production and conversion	PREDICTED: phosphoenolpyruvate carboxylase, housekeeping isozyme [Malus domestica]
MD12G1260900	20.6242	23.7233	19.7752	53.9845	21.1753	17.4075	19.808	22.8003	16.7721	27.7368	42.7228	19.3069	[P]	Inorganic ion transport and metabolism	Molecular Function: copper-exporting ATPase activity (GO:0004008);; Molecular Function: ATP binding (GO:0005524);; Cellular Component: integral component of membrane (GO:0016021);; Molecular Function: metal ion binding (GO:0046872);; Biological Process: copper ion export (GO:0060003);;	K01533|0|mdm:103424630|K01533 Cu2+-exporting ATPase [EC:3.6.3.4] | (RefSeq) copper-transporting ATPase PAA2, chloroplastic-like	[P]	Inorganic ion transport and metabolism	Copper-transporting ATPase PAA2, chloroplastic OS=Arabidopsis thaliana OX=3702 GN=PAA2 PE=1 SV=1	P	Inorganic ion transport and metabolism	PREDICTED: copper-transporting ATPase PAA2, chloroplastic-like [Malus domestica]
MD06G1044800	21.9872	16.8777	13.6378	42.4305	18.3297	16.9776	23.7856	20.6982	11.2046	95.5584	50.0244	15.9913	[P]	Inorganic ion transport and metabolism	Biological Process: sodium ion transport (GO:0006814);; Biological Process: regulation of pH (GO:0006885);; Molecular Function: sodium:proton antiporter activity (GO:0015385);; Cellular Component: integral component of membrane (GO:0016021);; Biological Process: transmembrane transport (GO:0055085);;	--	[P]	Inorganic ion transport and metabolism	Sodium/hydrogen exchanger 2 OS=Arabidopsis thaliana OX=3702 GN=NHX2 PE=2 SV=2	P	Inorganic ion transport and metabolism	PREDICTED: sodium/hydrogen exchanger 2-like [Malus domestica]
MD09G1174400	172.561	148.99	185.233	39.0029	35.2486	47.7873	232.966	162.177	164.995	50.8213	38.6903	48.819	--	--	Molecular Function: DNA binding (GO:0003677);; Molecular Function: transcription factor activity, sequence-specific DNA binding (GO:0003700);; Cellular Component: nucleus (GO:0005634);; Biological Process: regulation of transcription, DNA-templated (GO:0006355);;	K09286|0|mdm:103443637|K09286 EREBP-like factor | (RefSeq) AP2D55; ethylene-responsive transcription factor RAP2-12-like	--	--	Ethylene-responsive transcription factor RAP2-12 OS=Arabidopsis thaliana OX=3702 GN=RAP2-12 PE=1 SV=1	K	Transcription	ethylene-responsive transcription factor RAP2-12-like [Malus domestica]
MD02G1134000	35.6541	52.5646	49.345	38.761	24.5506	17.7781	20.828	31.0161	53.2877	54.388	49.246	25.7899	[J]	Translation, ribosomal structure and biogenesis	Molecular Function: RNA binding (GO:0003723);; Molecular Function: structural constituent of ribosome (GO:0003735);; Cellular Component: nucleolus (GO:0005730);; Cellular Component: plasma membrane (GO:0005886);; Biological Process: translation (GO:0006412);; Cellular Component: cytosolic small ribosomal subunit (GO:0022627);;	K02958|6.3932e-106|pxb:103938165|K02958 small subunit ribosomal protein S15e | (RefSeq) 40S ribosomal protein S15-4-like	[J]	Translation, ribosomal structure and biogenesis	40S ribosomal protein S15 OS=Oryza sativa subsp. japonica OX=39947 GN=RPS15 PE=2 SV=2	J	Translation, ribosomal structure and biogenesis	PREDICTED: 40S ribosomal protein S15-4 [Fragaria vesca subsp. vesca]
MD15G1031400	56.7605	81.7444	104.693	38.4798	31.5396	26.8036	62.6274	56.6326	110.898	34.2101	28.9723	30.3647	--	--	Cellular Component: nuclear envelope (GO:0005635);; Biological Process: protein import into nucleus (GO:0006606);; Biological Process: lipid transport (GO:0006869);; Biological Process: intra-Golgi vesicle-mediated transport (GO:0006891);; Molecular Function: Ran GTPase binding (GO:0008536);; Molecular Function: protein transporter activity (GO:0008565);; Biological Process: lithium ion transport…	--	[U]	Intracellular trafficking, secretion, and vesicular transport	Nuclear transport factor 2B OS=Arabidopsis thaliana OX=3702 GN=NTF2B PE=1 SV=1	U	Intracellular trafficking, secretion, and vesicular transport	PREDICTED: nuclear transport factor 2-like [Malus domestica]
MD02G1193900	62.6566	136.241	184.151	34.3563	75.241	50.0313	53.8166	55.0388	178.178	98.7357	35.4882	67.1516	--	--	Molecular Function: cytochrome-c oxidase activity (GO:0004129);; Cellular Component: mitochondrial respiratory chain complex IV (GO:0005751);;	K02266|1.53551e-39|mdm:103405422|K02266 cytochrome c oxidase subunit 6a | (RefSeq) cytochrome c oxidase subunit 6a, mitochondrial	[C]	Energy production and conversion	Cytochrome c oxidase subunit 6a, mitochondrial OS=Arabidopsis thaliana OX=3702 GN=COX6A PE=3 SV=1	O	Posttranslational modification, protein turnover, chaperones	PREDICTED: cytochrome c oxidase subunit 6a, mitochondrial [Malus domestica]
MD13G1175700	41.6828	54.0058	49.9585	34.1742	20.0989	12.8881	27.5274	40.8591	61.7747	42.0232	32.0334	23.4513	--	--	Molecular Function: structural constituent of ribosome (GO:0003735);; Cellular Component: nucleolus (GO:0005730);; Cellular Component: plasma membrane (GO:0005886);; Biological Process: translation (GO:0006412);; Cellular Component: cytosolic large ribosomal subunit (GO:0022625);;	K02891|1.76089e-48|mdm:103406072|K02891 large subunit ribosomal protein L22e | (RefSeq) 60S ribosomal protein L22-3	[J]	Translation, ribosomal structure and biogenesis	60S ribosomal protein L22-2 OS=Arabidopsis thaliana OX=3702 GN=RPL22B PE=2 SV=1	J	Translation, ribosomal structure and biogenesis	PREDICTED: 60S ribosomal protein L22-3 [Malus domestica]
MD13G1203100	47.9435	34.9493	55.6421	28.0789	25.1499	14.815	48.5334	44.9659	44.5827	27.3983	24.0178	18.1108	--	--	--	--	[S]	Function unknown	--	U	Intracellular trafficking, secretion, and vesicular transport	PREDICTED: stress-associated endoplasmic reticulum protein 2-like [Malus domestica]
MD08G1013400	13.1592	14.95	21.8218	26.215	9.77931	7.62158	15.3584	15.3912	18.4941	32.1095	28.8848	8.11445	--	--	Cellular Component: exocyst (GO:0000145);; Cellular Component: cytosol (GO:0005829);; Cellular Component: plasma membrane (GO:0005886);; Biological Process: vesicle docking involved in exocytosis (GO:0006904);; Biological Process: response to high light intensity (GO:0009644);; Biological Process: response to hydrogen peroxide (GO:0042542);;	K07195|0|mdm:103437542|K07195 exocyst complex component 7 | (RefSeq) exocyst complex component EXO70B1-like	[U]	Intracellular trafficking, secretion, and vesicular transport	Exocyst complex component EXO70A1 OS=Arabidopsis thaliana OX=3702 GN=EXO70A1 PE=1 SV=1	S	Function unknown	PREDICTED: exocyst complex component EXO70B1-like [Malus domestica]
MD12G1192800	22.1611	20.4	21.7297	25.8889	33.2115	30.6701	22.7969	24.8027	21.4868	19.0415	25.5253	45.1481	[G]	Carbohydrate transport and metabolism	Molecular Function: glucose-6-phosphate isomerase activity (GO:0004347);; Cellular Component: cytoplasm (GO:0005737);; Biological Process: gluconeogenesis (GO:0006094);; Biological Process: glycolytic process (GO:0006096);;	K01810|0|mdm:103440430|K01810 glucose-6-phosphate isomerase [EC:5.3.1.9] | (RefSeq) glucose-6-phosphate isomerase, cytosolic	[G]	Carbohydrate transport and metabolism	Glucose-6-phosphate isomerase, cytosolic 1 OS=Clarkia mildrediae OX=49756 GN=PGIC1 PE=3 SV=1	G	Carbohydrate transport and metabolism	PREDICTED: glucose-6-phosphate isomerase, cytosolic [Malus domestica]
MD09G1233700	16.136	23.7508	17.9372	24.3545	45.3279	19.4894	8.83894	12.0534	16.1393	9.58518	16.6241	46.7519	[O]	Posttranslational modification, protein turnover, chaperones	Molecular Function: ATP binding (GO:0005524);; Cellular Component: mitochondrion (GO:0005739);; Cellular Component: chloroplast stroma (GO:0009570);; Cellular Component: thylakoid (GO:0009579);; Biological Process: chloroplast organization (GO:0009658);; Biological Process: embryo development (GO:0009790);; Cellular Component: chloroplast envelope (GO:0009941);; Cellular Component: membrane (GO:0…	--	[O]	Posttranslational modification, protein turnover, chaperones	RuBisCO large subunit-binding protein subunit alpha, chloroplastic OS=Pisum sativum OX=3888 PE=1 SV=2	O	Posttranslational modification, protein turnover, chaperones	PREDICTED: ruBisCO large subunit-binding protein subunit alpha-like [Malus domestica]
MD00G1082000	42.2736	58.8923	65.989	22.9569	10.6189	14.3162	41.9553	43.3564	57.6894	30.508	25.9878	13.7852	--	--	--	K20721|3.36453e-170|mdm:103439819|K20721 reticulon-1 | (RefSeq) reticulon-like protein B1	[U]	Intracellular trafficking, secretion, and vesicular transport	Reticulon-like protein B1 OS=Arabidopsis thaliana OX=3702 GN=RTNLB1 PE=1 SV=1	U	Intracellular trafficking, secretion, and vesicular transport	PREDICTED: reticulon-like protein B1 [Malus domestica]
MD10G1287300	9.41485	24.9113	19.3223	22.3064	14.7603	11.3062	16.3422	15.7447	19.2115	31.8568	25.9155	11.2888	--	--	Cellular Component: proteasome regulatory particle (GO:0005838);; Biological Process: proteolysis (GO:0006508);;	K03031|6.2636e-174|mdm:103400669|K03031 26S proteasome regulatory subunit N12 | (RefSeq) 26S proteasome non-ATPase regulatory subunit 8 homolog A	[O]	Posttranslational modification, protein turnover, chaperones	26S proteasome non-ATPase regulatory subunit 8 homolog A OS=Arabidopsis thaliana OX=3702 GN=RPN12A PE=1 SV=1	O	Posttranslational modification, protein turnover, chaperones	PREDICTED: 26S proteasome non-ATPase regulatory subunit 8 homolog A [Malus domestica]
MD10G1058000	7.69154	11.1276	13.7063	22.0048	35.2081	34.9137	6.30103	24.9721	12.1252	11.3313	22.2403	38.1045	[Q]	Secondary metabolites biosynthesis, transport and catabolism	--	--	[R]	General function prediction only	Endo-1,3;1,4-beta-D-glucanase OS=Zea mays OX=4577 PE=1 SV=1	Q	Secondary metabolites biosynthesis, transport and catabolism	PREDICTED: endo-1,3;1,4-beta-D-glucanase-like [Malus domestica]
MD03G1146100	20.7416	29.1168	38.03	20.7241	8.32542	7.36412	22.2697	21.3221	42.6375	25.5617	23.9641	7.37931	[CE]	--	Molecular Function: magnesium ion binding (GO:0000287);; Molecular Function: isocitrate dehydrogenase (NAD+) activity (GO:0004449);; Biological Process: tricarboxylic acid cycle (GO:0006099);; Molecular Function: NAD binding (GO:0051287);;	K00030|0|mdm:103445208|K00030 isocitrate dehydrogenase (NAD+) [EC:1.1.1.41] | (RefSeq) isocitrate dehydrogenase [NAD] regulatory subunit 1, mitochondrial	[E]	Amino acid transport and metabolism	Isocitrate dehydrogenase [NAD] regulatory subunit 1, mitochondrial OS=Arabidopsis thaliana OX=3702 GN=IDH1 PE=1 SV=2	E	Amino acid transport and metabolism	PREDICTED: isocitrate dehydrogenase [NAD] regulatory subunit 1, mitochondrial [Malus domestica]
MD10G1187000	21.192	62.7442	37.1254	20.5828	21.2785	14.6036	14.9609	18.8624	44.1694	28.4583	27.8588	21.3952	--	--	--	K17790|8.21373e-113|pxb:103964847|K17790 mitochondrial import inner membrane translocase subunit TIM22 | (RefSeq) outer envelope pore protein 16-3, chloroplastic/mitochondrial-like	[U]	Intracellular trafficking, secretion, and vesicular transport	Outer envelope pore protein 16-3, chloroplastic/mitochondrial OS=Arabidopsis thaliana OX=3702 GN=OEP163 PE=1 SV=1	O	Posttranslational modification, protein turnover, chaperones	PREDICTED: outer envelope pore protein 16-3, chloroplastic/mitochondrial-like [Malus domestica]
MD04G1224100	19.2159	22.3267	18.7505	20.4736	2.4612	4.8629	20.2277	10.549	19.1734	24.9772	19.9056	2.27648	--	--	--	--	--	--	Probable WRKY transcription factor 61 OS=Arabidopsis thaliana OX=3702 GN=WRKY61 PE=2 SV=1	K	Transcription	PREDICTED: probable WRKY transcription factor 61 isoform X2 [Malus domestica]
MD13G1120700	26.649	21.6596	15.1471	19.6711	12.0381	20.1533	74.3878	70.8518	18.047	25.9186	31.0235	16.0217	--	--	--	--	--	--	--	S	Function unknown	hypothetical protein PRUPE_7G016200 [Prunus persica]
MD09G1019600	10.7024	7.62876	11.2749	19.2287	12.0359	10.9533	10.5566	11.215	10.684	10.5957	17.9597	10.348	--	--	--	--	[T]	Signal transduction mechanisms	Protein NPGR2 OS=Arabidopsis thaliana OX=3702 GN=NPGR2 PE=1 SV=1	S	Function unknown	PREDICTED: tetratricopeptide repeat protein 7A [Malus domestica]
MD05G1042300	5.25424	7.72944	7.18584	18.8836	6.32172	5.46698	5.29561	6.09302	6.37231	42.2462	23.1507	5.46839	[I]	Lipid transport and metabolism	Molecular Function: phospholipase A2 activity (GO:0004623);; Biological Process: toxin catabolic process (GO:0009407);; Biological Process: response to chitin (GO:0010200);; Biological Process: response to cyclopentenone (GO:0010583);; Molecular Function: lysophosphatidic acid acyltransferase activity (GO:0042171);; Biological Process: defense response by callose deposition (GO:0052542);; Biologi…	--	[R]	General function prediction only	1-acylglycerol-3-phosphate O-acyltransferase OS=Arabidopsis thaliana OX=3702 GN=At4g24160 PE=1 SV=1	S	Function unknown	PREDICTED: 1-acylglycerol-3-phosphate O-acyltransferase-like [Malus domestica]
MD10G1179600	10.6509	25.5546	32.0994	18.4936	24.1267	13.3825	9.73627	8.51004	22.6973	4.77244	11.1218	15.1527	[QR]	--	Molecular Function: nucleotide binding (GO:0000166);; Molecular Function: zinc ion binding (GO:0008270);; Molecular Function: 2-alkenal reductase [NAD(P)] activity (GO:0032440);; Biological Process: oxidation-reduction process (GO:0055114);;	--	[R]	General function prediction only	2-alkenal reductase (NADP(+)-dependent) OS=Nicotiana tabacum OX=4097 GN=DBR PE=1 SV=1	S	Function unknown	2-alkenal reductase (NADP(+)-dependent) [Prunus persica]
MD15G1188400	13.2096	15.2697	16.1635	17.9163	18.4556	15.2928	13.1251	14.4535	17.2722	15.453	20.4219	23.0947	[C]	Energy production and conversion	--	K00161|0|mdm:103439433|K00161 pyruvate dehydrogenase E1 component alpha subunit [EC:1.2.4.1] | (RefSeq) pyruvate dehydrogenase E1 component subunit alpha-3, chloroplastic	[C]	Energy production and conversion	Pyruvate dehydrogenase E1 component subunit alpha-3, chloroplastic OS=Arabidopsis thaliana OX=3702 GN=PDH-E1 ALPHA PE=2 SV=1	C	Energy production and conversion	PREDICTED: pyruvate dehydrogenase E1 component subunit alpha-3, chloroplastic [Malus domestica]
MD08G1004700	28.1773	14.0225	14.3957	17.7421	6.47904	5.53264	38.5844	1.43377	10.479	60.4837	26.6033	5.55387	[G]	Carbohydrate transport and metabolism	--	K01183|0|mdm:103441854|K01183 chitinase [EC:3.2.1.14] | (RefSeq) acidic mammalian chitinase-like	[G]	Carbohydrate transport and metabolism	Class V chitinase OS=Arabidopsis thaliana OX=3702 GN=ChiC PE=1 SV=1	G	Carbohydrate transport and metabolism	PREDICTED: acidic mammalian chitinase-like [Malus domestica]
MD14G1132800	15.8502	16.4763	16.1016	17.4132	11.016	7.87289	16.1523	17.102	18.5082	22.1478	21.49	11.8712	--	--	Biological Process: mRNA export from nucleus (GO:0006406);; Biological Process: protein import into nucleus (GO:0006606);;	K14840|0|mdm:103432886|K14840 nucleolar protein 53 | (RefSeq) uncharacterized protein At2g40430	[R]	General function prediction only	Ribosome biogenesis protein NOP53 OS=Arabidopsis thaliana OX=3702 GN=At2g40430 PE=1 SV=2	S	Function unknown	PREDICTED: uncharacterized protein At2g40430 [Malus domestica]
MD12G1012300	18.1878	17.7775	13.832	16.7733	13.4045	14.3505	29.8152	25.5647	13.6952	18.3638	19.0208	9.87889	--	--	--	--	--	--	Zinc finger CCCH domain-containing protein 30 OS=Oryza sativa subsp. japonica OX=39947 GN=Os04g0663200 PE=2 SV=3	S	Function unknown	PREDICTED: zinc finger CCCH domain-containing protein 6-like [Malus domestica]
MD15G1125100	17.9985	18.1389	19.4357	16.2858	8.80139	10.0403	16.2411	16.1056	16.8528	8.41926	11.8369	10.7096	[O]	Posttranslational modification, protein turnover, chaperones	--	--	[O]	Posttranslational modification, protein turnover, chaperones	Ubiquitin domain-containing protein DSK2b OS=Arabidopsis thaliana OX=3702 GN=DSK2B PE=1 SV=1	O	Posttranslational modification, protein turnover, chaperones	PREDICTED: large proline-rich protein BAG6-like isoform X3 [Malus domestica]
MD13G1081900	14.9587	19.6389	33.0016	15.8553	11.3614	11.443	15.3922	15.0901	30.4429	16.8515	14.7187	11.3732	[R]	General function prediction only	--	K06990|0|pxb:103946734|K06990 MEMO1 family protein | (RefSeq) protein MEMO1	[R]	General function prediction only	--	S	Function unknown	PREDICTED: protein MEMO1 [Pyrus x bretschneideri]
MD06G1166600	8.45736	8.35411	9.36226	15.6314	9.18769	5.55128	8.51341	8.76105	5.11341	11.5048	14.2443	8.28358	--	--	--	--	[I]	Lipid transport and metabolism	Patellin-6 OS=Arabidopsis thaliana OX=3702 GN=PATL6 PE=2 SV=1	S	Function unknown	PREDICTED: random slug protein 5-like [Malus domestica]
MD00G1052100	17.1607	25.6197	23.6543	15.0331	15.0964	13.6252	33.654	19.492	15.8408	17.5607	16.0265	28.4771	--	--	--	K03115|4.7896e-170|mdm:103436952|K03115 casein kinase II subunit beta | (RefSeq) putative casein kinase II subunit beta-4	[TDK]	--	Putative casein kinase II subunit beta-4 OS=Arabidopsis thaliana OX=3702 GN=CKB4 PE=1 SV=1	DKT	--	PREDICTED: putative casein kinase II subunit beta-4 isoform X6 [Malus domestica]
MD11G1261900	14.6798	13.9915	12.8528	14.5171	6.40852	12.6077	7.33719	14.6575	10.7433	7.5198	13.6348	11.5029	--	--	--	--	--	--	--	S	Function unknown	PREDICTED: uncharacterized protein LOC103445638 [Malus domestica]
MD10G1185200	31.8497	16.7936	24.1421	13.7358	7.1673	6.87956	33.4407	32.2353	27.1438	16.9218	14.8217	6.61055	[P]	Inorganic ion transport and metabolism	--	K05016|0|mdm:103453107|K05016 chloride channel 7 | (RefSeq) chloride channel protein CLC-d	[P]	Inorganic ion transport and metabolism	Chloride channel protein CLC-d OS=Arabidopsis thaliana OX=3702 GN=CLC-D PE=1 SV=2	P	Inorganic ion transport and metabolism	PREDICTED: chloride channel protein CLC-d isoform X1 [Malus domestica]
MD13G1074200	13.6026	7.75803	14.5753	13.4322	4.98663	3.57482	12.3904	13.9355	12.306	10.3193	12.1666	3.63908	[G]	Carbohydrate transport and metabolism	Cellular Component: integral component of membrane (GO:0016021);; Molecular Function: substrate-specific transmembrane transporter activity (GO:0022891);; Biological Process: transmembrane transport (GO:0055085);;	--	[R]	General function prediction only	D-xylose-proton symporter-like 2 OS=Arabidopsis thaliana OX=3702 GN=At5g17010 PE=1 SV=1	G	Carbohydrate transport and metabolism	PREDICTED: D-xylose-proton symporter-like 2 [Malus domestica]
MD08G1029000	14.2805	24.4751	21.1205	12.1895	22.5741	31.1725	13.2173	10.7869	19.3304	5.51578	10.1889	21.5978	[TK]	--	--	K12129|0|pxb:103934049|K12129 pseudo-response regulator 7 | (RefSeq) two-component response regulator-like APRR7	[K]	Transcription	Two-component response regulator-like APRR7 OS=Arabidopsis thaliana OX=3702 GN=APRR7 PE=1 SV=1	K	Transcription	PREDICTED: two-component response regulator-like APRR7 isoform X1 [Pyrus x bretschneideri]
MD07G1068200	13.0543	12.8318	10.597	11.9743	7.70125	9.70866	19.8374	18.4717	11.1291	14.9246	11.1845	9.41402	--	--	Molecular Function: nucleic acid binding (GO:0003676);; Molecular Function: metal ion binding (GO:0046872);;	--	[R]	General function prediction only	Protein indeterminate-domain 2 OS=Arabidopsis thaliana OX=3702 GN=IDD2 PE=1 SV=1	S	Function unknown	C2H2L domain class transcription factor [Malus domestica]
MD12G1161000	18.7696	14.9222	11.5287	11.4342	6.86644	6.65202	15.9659	17.4913	9.01038	16.673	12.421	7.12857	[EH]	--	--	K00826|0|mdm:103405053|K00826 branched-chain amino acid aminotransferase [EC:2.6.1.42] | (RefSeq) branched-chain-amino-acid aminotransferase 3, chloroplastic	[E]	Amino acid transport and metabolism	Branched-chain amino acid aminotransferase 2, chloroplastic OS=Humulus lupulus OX=3486 GN=BCAT2 PE=1 SV=1	E	Amino acid transport and metabolism	PREDICTED: branched-chain-amino-acid aminotransferase 3, chloroplastic [Malus domestica]
MD15G1266200	19.1404	21.0875	14.9861	11.3116	7.33262	6.44368	24.7513	20.6954	18.6722	17.4736	11.5989	7.08258	--	--	Molecular Function: transcription factor activity, sequence-specific DNA binding (GO:0003700);; Cellular Component: nucleus (GO:0005634);; Biological Process: regulation of transcription, DNA-templated (GO:0006355);; Biological Process: response to heat (GO:0009408);; Molecular Function: sequence-specific DNA binding (GO:0043565);;	K09419|0|pxb:103955120|K09419 heat shock transcription factor, other eukaryote | (RefSeq) heat stress transcription factor A-4b-like	[K]	Transcription	Heat stress transcription factor A-4b OS=Oryza sativa subsp. japonica OX=39947 GN=HSFA4B PE=2 SV=1	K	Transcription	PREDICTED: heat stress transcription factor A-4b-like [Pyrus x bretschneideri]
MD12G1165800	5.12923	0.710251	2.30485	0.447683	13.3238	13.4903	10.9714	11.1178	1.70392	0.020255	0.185729	24.3086	[P]	Inorganic ion transport and metabolism	Biological Process: calcium ion transport (GO:0006816);; Molecular Function: calcium:proton antiporter activity (GO:0015369);; Cellular Component: integral component of membrane (GO:0016021);; Biological Process: transmembrane transport (GO:0055085);;	K07300|0|mdm:103450620|K07300 Ca2+:H+ antiporter | (RefSeq) vacuolar cation/proton exchanger 3-like	[P]	Inorganic ion transport and metabolism	Vacuolar cation/proton exchanger 3 OS=Arabidopsis thaliana OX=3702 GN=CAX3 PE=1 SV=1	P	Inorganic ion transport and metabolism	PREDICTED: vacuolar cation/proton exchanger 3-like [Malus domestica]
MD13G1188900	23.3505	26.3502	28.5252	11.1789	4.71335	1.04882	29.5116	26.1384	25.6065	9.60374	11.9311	4.20945	[N]	Cell motility	--	--	--	--	Cellulose synthase-like protein E1 OS=Arabidopsis thaliana OX=3702 GN=CSLE1 PE=2 SV=1	S	Function unknown	PREDICTED: cellulose synthase-like protein E1 isoform X1 [Pyrus x bretschneideri]
MD10G1339800	8.94388	9.50951	7.98272	11.0973	6.31599	5.58046	8.55465	7.71409	9.56685	10.5481	11.9859	4.78483	--	--	--	--	[TU]	--	Protein FREE1 OS=Arabidopsis thaliana OX=3702 GN=FREE1 PE=1 SV=1	S	Function unknown	PREDICTED: uncharacterized protein LOC103958022 [Pyrus x bretschneideri]
MD07G1132500	0.481282	42.759	53.3537	10.6315	71.8478	14.939	0.27336	0.227458	28.5635	0.986493	4.86916	15.0867	[O]	Posttranslational modification, protein turnover, chaperones	--	K00799|6.14899e-156|mdm:103451887|K00799 glutathione S-transferase [EC:2.5.1.18] | (RefSeq) glutathione S-transferase U17-like	[O]	Posttranslational modification, protein turnover, chaperones	Glutathione S-transferase U17 OS=Arabidopsis thaliana OX=3702 GN=GSTU17 PE=2 SV=1	O	Posttranslational modification, protein turnover, chaperones	PREDICTED: glutathione S-transferase U17-like [Malus domestica]
MD04G1020100	56.3637	52.0582	81.765	10.4418	5.0495	7.13021	33.4333	62.3094	101.407	4.69524	7.48215	4.44601	--	--	--	--	--	--	Transcription factor LHW OS=Arabidopsis thaliana OX=3702 GN=LHW PE=1 SV=1	S	Function unknown	PREDICTED: transcription factor EMB1444-like isoform X1 [Malus domestica]
MD05G1073700	6.984	8.60076	10.711	10.0933	5.21582	4.80885	10.1509	6.30595	12.3631	10.4294	11.3355	4.71293	[C]	Energy production and conversion	Biological Process: leucine catabolic process (GO:0006552);; Molecular Function: electron carrier activity (GO:0009055);; Biological Process: chlorophyll catabolic process (GO:0015996);; Biological Process: methylglyoxal catabolic process to D-lactate via S-lactoyl-glutathione (GO:0019243);;	K03521|1.40175e-179|mdm:103453422|K03521 electron transfer flavoprotein beta subunit | (RefSeq) electron transfer flavoprotein subunit beta, mitochondrial	[C]	Energy production and conversion	Electron transfer flavoprotein subunit beta, mitochondrial OS=Arabidopsis thaliana OX=3702 GN=ETFB PE=1 SV=1	C	Energy production and conversion	PREDICTED: electron transfer flavoprotein subunit beta, mitochondrial [Malus domestica]
MD12G1076000	21.5974	8.78197	15.689	9.6947	5.18775	4.1238	21.3459	21.2124	15.8068	5.50683	8.65151	3.69036	--	--	--	--	[G]	Carbohydrate transport and metabolism	Purple acid phosphatase 18 OS=Arabidopsis thaliana OX=3702 GN=PAP18 PE=2 SV=1	S	Function unknown	PREDICTED: purple acid phosphatase 18-like [Malus domestica]
MD04G1124300	6.098	7.10862	11.76	9.4252	7.66196	8.35567	5.31236	6.31405	8.88654	8.45144	8.97324	8.57354	--	--	--	K04710|3.95383e-180|mdm:103436493|K04710 ceramide synthetase [EC:2.3.1.24] | (RefSeq) LAG1 longevity assurance homolog 2	[U]	Intracellular trafficking, secretion, and vesicular transport	LAG1 longevity assurance homolog 2 OS=Arabidopsis thaliana OX=3702 GN=LAG2 PE=1 SV=1	U	Intracellular trafficking, secretion, and vesicular transport	PREDICTED: LAG1 longevity assurance homolog 2 [Malus domestica]
MD13G1212500	8.45664	13.5084	11.2273	9.18704	15.7684	7.85651	9.0156	7.37615	8.87965	3.92472	6.68403	9.71656	[R]	General function prediction only	Molecular Function: nucleotide binding (GO:0000166);; Molecular Function: zinc ion binding (GO:0008270);; Biological Process: response to wounding (GO:0009611);; Biological Process: coumarin biosynthetic process (GO:0009805);; Molecular Function: oxidoreductase activity (GO:0016491);; Molecular Function: transferase activity, transferring acyl groups other than amino-acyl groups (GO:0016747);; Bi…	K00001|0|mdm:103438307|K00001 alcohol dehydrogenase [EC:1.1.1.1] | (RefSeq) alcohol dehydrogenase-like 6	[Q]	Secondary metabolites biosynthesis, transport and catabolism	Alcohol dehydrogenase-like 6 OS=Arabidopsis thaliana OX=3702 GN=At5g24760 PE=2 SV=2	C	Energy production and conversion	PREDICTED: alcohol dehydrogenase-like 6 isoform X2 [Malus domestica]
MD08G1017500	12.6129	9.0561	20.7689	9.05551	6.44014	4.89713	10.8392	16.384	21.331	10.9898	8.9849	5.67655	--	--	Cellular Component: mitochondrion (GO:0005739);; Biological Process: intracellular protein transport (GO:0006886);; Molecular Function: protein transporter activity (GO:0008565);; Cellular Component: AP-2 adaptor complex (GO:0030122);;	K11827|2.39657e-98|fve:101307955|K11827 AP-2 complex subunit sigma-1 | (RefSeq) AP-2 complex subunit sigma	[U]	Intracellular trafficking, secretion, and vesicular transport	AP-2 complex subunit sigma OS=Arabidopsis thaliana OX=3702 GN=AP17 PE=2 SV=1	U	Intracellular trafficking, secretion, and vesicular transport	PREDICTED: AP-2 complex subunit sigma [Fragaria vesca subsp. vesca]
MD15G1361000	15.0339	12.9929	11.7608	8.42494	8.55155	12.6326	16.3835	17.3825	9.9381	4.1657	8.96158	10.9776	[J]	Translation, ribosomal structure and biogenesis	--	K12900|3.68301e-57|mdm:103453006|K12900 FUS-interacting serine-arginine-rich protein 1 | (RefSeq) serine/arginine-rich SC35-like splicing factor SCL28	[R]	General function prediction only	Serine/arginine-rich SC35-like splicing factor SCL28 OS=Arabidopsis thaliana OX=3702 GN=SCL28 PE=1 SV=1	S	Function unknown	PREDICTED: serine/arginine-rich SC35-like splicing factor SCL28 isoform X1 [Malus domestica]
MD08G1188100	16.3666	11.1891	17.1147	8.22062	10.0635	9.38719	15.9814	22.5961	12.1948	5.10607	7.65482	6.86446	[O]	Posttranslational modification, protein turnover, chaperones	Molecular Function: ubiquitin-protein transferase activity (GO:0004842);; Biological Process: ubiquitin-dependent protein catabolic process (GO:0006511);; Biological Process: protein ubiquitination (GO:0016567);;	K04649|4.26601e-142|mdm:103428259|K04649 ubiquitin-conjugating enzyme (huntingtin interacting protein 2) [EC:2.3.2.23] | (RefSeq) ubiquitin-conjugating enzyme E2 27-like	[O]	Posttranslational modification, protein turnover, chaperones	Ubiquitin-conjugating enzyme E2 27 OS=Arabidopsis thaliana OX=3702 GN=UBC27 PE=2 SV=1	O	Posttranslational modification, protein turnover, chaperones	PREDICTED: ubiquitin-conjugating enzyme E2 27-like [Malus domestica]
MD08G1043700	7.79171	7.82388	10.3102	7.80841	3.92804	3.59111	8.11952	7.53229	7.52548	14.0699	10.0449	3.87658	[O]	Posttranslational modification, protein turnover, chaperones	Biological Process: protein peptidyl-prolyl isomerization (GO:0000413);; Molecular Function: peptidyl-prolyl cis-trans isomerase activity (GO:0003755);; Cellular Component: endosome (GO:0005768);; Cellular Component: Golgi apparatus (GO:0005794);; Cellular Component: trans-Golgi network (GO:0005802);; Biological Process: protein folding (GO:0006457);;	--	[O]	Posttranslational modification, protein turnover, chaperones	Peptidyl-prolyl cis-trans isomerase CYP23 OS=Arabidopsis thaliana OX=3702 GN=CYP23 PE=2 SV=1	O	Posttranslational modification, protein turnover, chaperones	PREDICTED: peptidyl-prolyl cis-trans isomerase CYP23-like [Malus domestica]
MD00G1008600	6.99504	6.255	6.96946	7.80489	3.09373	3.30109	10.4452	6.76244	9.71495	10.4135	12.0708	3.69486	--	--	--	K14190|0|mdm:103446110|K14190 GDP-L-galactose phosphorylase [EC:2.7.7.69] | (RefSeq) GDP-L-galactose phosphorylase 2-like	[R]	General function prediction only	GDP-L-galactose phosphorylase 2 OS=Arabidopsis thaliana OX=3702 GN=VTC5 PE=1 SV=1	S	Function unknown	PREDICTED: GDP-L-galactose phosphorylase 2-like [Malus domestica]
MD09G1236600	3.08855	6.3509	7.58489	7.56392	2.92713	2.40851	5.22401	3.79466	4.72646	3.72979	7.72685	3.94171	[IR]	--	--	--	--	--	GDSL esterase/lipase 1 OS=Arabidopsis thaliana OX=3702 GN=GLIP1 PE=1 SV=1	S	Function unknown	PREDICTED: GDSL esterase/lipase 1-like [Malus domestica]
MD10G1172000	8.34822	12.2455	8.37608	7.54063	7.45481	6.17467	16.5037	14.747	9.83481	11.3798	7.8966	7.36231	--	--	Molecular Function: zinc ion binding (GO:0008270);; Molecular Function: ligase activity (GO:0016874);;	--	--	--	--	S	Function unknown	PREDICTED: uncharacterized protein LOC103424569 [Malus domestica]
MD07G1229400	10.9572	29.3795	10.4198	7.49289	8.46866	2.53931	23.7366	8.26443	8.64614	19.3539	7.57787	5.73675	--	--	--	K10666|1.04816e-165|mdm:103429372|K10666 E3 ubiquitin-protein ligase RNF5 [EC:2.3.2.27] | (RefSeq) E3 ubiquitin-protein ligase RMA1H1-like	[O]	Posttranslational modification, protein turnover, chaperones	E3 ubiquitin-protein ligase RMA1H1 OS=Capsicum annuum OX=4072 GN=RMA1H1 PE=1 SV=1	O	Posttranslational modification, protein turnover, chaperones	PREDICTED: E3 ubiquitin-protein ligase RMA1H1-like [Malus domestica]
MD03G1029000	3.77388	11.9151	7.85467	7.44761	4.90224	1.33089	13.9795	7.87161	6.03565	56.2972	13.6598	1.24793	--	--	--	--	--	--	--	S	Function unknown	hypothetical protein PRUPE_6G264500 [Prunus persica]
MD13G1077900	18.8645	35.8481	36.9402	7.26521	6.58739	6.1246	12.9325	14.9183	28.0724	6.79338	5.55428	7.08892	[Q]	Secondary metabolites biosynthesis, transport and catabolism	--	--	[QR]	--	1-aminocyclopropane-1-carboxylate oxidase homolog 1 OS=Arabidopsis thaliana OX=3702 GN=At1g06620 PE=2 SV=1	S	Function unknown	PREDICTED: 1-aminocyclopropane-1-carboxylate oxidase homolog 1-like [Malus domestica]
MD05G1081300	7.0743	19.9721	12.0596	6.46784	25.8717	23.7	4.42921	5.65854	10.5921	2.72019	6.98174	23.7362	--	--	--	--	--	--	--	--	--	PREDICTED: sodium/potassium/calcium exchanger 1-like [Malus domestica]
MD05G1043200	8.39673	4.00775	3.82952	6.19421	4.71337	5.38249	8.04305	8.6768	3.7407	6.31862	4.71058	4.32753	--	--	Molecular Function: DNA binding (GO:0003677);; Molecular Function: chromatin binding (GO:0003682);;	--	[O]	Posttranslational modification, protein turnover, chaperones	Protein REVEILLE 5 OS=Arabidopsis thaliana OX=3702 GN=RVE5 PE=2 SV=1	K	Transcription	protein REVEILLE 5-like [Malus domestica]
MD10G1156200	8.79907	9.43276	10.039	6.17798	7.11409	4.70202	7.45704	6.27	8.23336	10.0375	8.56275	5.48431	[O]	Posttranslational modification, protein turnover, chaperones	--	--	[C]	Energy production and conversion	Hypersensitive-induced response protein 4 OS=Arabidopsis thaliana OX=3702 GN=HIR4 PE=1 SV=1	O	Posttranslational modification, protein turnover, chaperones	PREDICTED: hypersensitive-induced response protein 4 [Malus domestica]
MD00G1051300	33.3177	19.9116	37.7036	5.97487	20.6967	22.4526	19.2597	31.5246	53.1405	2.47428	5.45669	24.703	[K]	Transcription	--	--	--	--	Probable LRR receptor-like serine/threonine-protein kinase At1g06840 OS=Arabidopsis thaliana OX=3702 GN=At1g06840 PE=2 SV=2	T	Signal transduction mechanisms	PREDICTED: probable LRR receptor-like serine/threonine-protein kinase At1g06840 [Malus domestica]
MD03G1278600	13.222	17.6857	26.0678	5.97033	5.53559	4.26375	10.207	8.90649	21.0868	8.16297	5.61874	5.11576	[C]	Energy production and conversion	Molecular Function: succinate-CoA ligase (GDP-forming) activity (GO:0004776);; Molecular Function: copper ion binding (GO:0005507);; Molecular Function: ATP binding (GO:0005524);; Biological Process: gluconeogenesis (GO:0006094);; Biological Process: glycolytic process (GO:0006096);; Biological Process: ubiquitin-dependent protein catabolic process (GO:0006511);; Biological Process: response to s…	K01900|0|mdm:103445597|K01900 succinyl-CoA synthetase beta subunit [EC:6.2.1.4 6.2.1.5] | (RefSeq) succinyl-CoA ligase [ADP-forming] subunit beta, mitochondrial	[C]	Energy production and conversion	Succinate--CoA ligase [ADP-forming] subunit beta, mitochondrial OS=Arabidopsis thaliana OX=3702 GN=At2g20420 PE=1 SV=1	C	Energy production and conversion	PREDICTED: succinyl-CoA ligase [ADP-forming] subunit beta, mitochondrial [Malus domestica]
MD09G1174700	9.86024	6.24738	12.8353	5.94079	6.24533	9.5219	13.5887	13.0943	14.9995	7.03331	7.8166	7.61366	--	--	--	--	--	--	Transcription factor VOZ1 OS=Arabidopsis thaliana OX=3702 GN=VOZ1 PE=1 SV=1	S	Function unknown	PREDICTED: transcription factor VOZ1 [Malus domestica]
MD04G1028200	2.41594	4.81463	3.23106	5.85129	30.034	60.1433	1.76367	1.51675	2.61951	2.22207	3.78112	40.8579	[M]	Cell wall/membrane/envelope biogenesis	Cellular Component: cytosol (GO:0005829);; Biological Process: nucleotide-sugar metabolic process (GO:0009225);; Biological Process: L-ascorbic acid biosynthetic process (GO:0019853);; Molecular Function: GDP-mannose 3,5-epimerase activity (GO:0047918);; Molecular Function: NAD binding (GO:0051287);;	K10046|0|mdm:103434162|K10046 GDP-D-mannose 3', 5'-epimerase [EC:5.1.3.18 5.1.3.-] | (RefSeq) GDP-mannose 3,5-epimerase 2	[GM]	--	GDP-mannose 3,5-epimerase OS=Arabidopsis thaliana OX=3702 GN=At5g28840 PE=1 SV=1	M	Cell wall/membrane/envelope biogenesis	PREDICTED: GDP-mannose 3,5-epimerase 2 [Malus domestica]
MD12G1004600	3.26973	2.98392	1.8737	5.43345	7.76979	12.2619	4.00651	3.83101	2.88555	2.36022	4.87217	11.1085	[J]	Translation, ribosomal structure and biogenesis	Molecular Function: translation release factor activity (GO:0003747);; Biological Process: translational termination (GO:0006415);;	K15033|7.94955e-156|mdm:103408295|K15033 peptidyl-tRNA hydrolase ICT1 [EC:3.1.1.29] | (RefSeq) peptidyl-tRNA hydrolase ICT1, mitochondrial-like	[J]	Translation, ribosomal structure and biogenesis	--	J	Translation, ribosomal structure and biogenesis	PREDICTED: peptidyl-tRNA hydrolase ICT1, mitochondrial-like isoform X1 [Malus domestica]
MD03G1028900	29.02	58.8009	35.0622	5.20014	2.78014	3.40507	19.6417	25.672	34.0009	26.0279	12.6953	3.95798	--	--	--	--	--	--	Organ-specific protein P4 OS=Pisum sativum OX=3888 PE=2 SV=1	S	Function unknown	PREDICTED: organ-specific protein S2-like [Malus domestica]
MD10G1029100	7.75592	8.91945	10.2215	5.08051	2.95872	3.14137	7.86956	8.04155	8.15688	3.22383	3.80288	3.72376	--	--	Cellular Component: P-body (GO:0000932);; Cellular Component: small nucleolar ribonucleoprotein complex (GO:0005732);; Biological Process: vegetative to reproductive phase transition of meristem (GO:0010228);; Biological Process: RNA metabolic process (GO:0016070);;	K12620|7.33238e-73|pxb:103942398|K12620 U6 snRNA-associated Sm-like protein LSm1 | (RefSeq) sm-like protein LSM1B	[A]	RNA processing and modification	Sm-like protein LSM1B OS=Arabidopsis thaliana OX=3702 GN=LSM1B PE=1 SV=1	K	Transcription	PREDICTED: sm-like protein LSM1B [Malus domestica]
MD12G1123400	11.8723	7.04668	9.53356	4.95008	1.27228	1.19102	12.9265	11.8907	14.4621	7.69402	8.75567	1.63834	[IQR]	--	--	K15095|0|mdm:103400719|K15095 (+)-neomenthol dehydrogenase [EC:1.1.1.208] | (RefSeq) (+)-neomenthol dehydrogenase-like	[Q]	Secondary metabolites biosynthesis, transport and catabolism	(+)-neomenthol dehydrogenase OS=Arabidopsis thaliana OX=3702 GN=SDR1 PE=1 SV=1	S	Function unknown	PREDICTED: (+)-neomenthol dehydrogenase-like [Malus domestica]
MD07G1040000	1.70109	1.85648	1.82643	4.73201	5.48143	4.88985	1.33381	1.99885	2.20167	4.90566	3.57913	4.69348	[P]	Inorganic ion transport and metabolism	Molecular Function: hydrolase activity (GO:0016787);;	--	--	--	--	S	Function unknown	PREDICTED: putative hydrolase C777.06c isoform X2 [Malus domestica]
MD11G1060100	6.09788	3.50191	2.72425	4.61092	4.50009	2.5415	4.96717	5.61409	3.27608	5.50694	5.47708	2.11067	[L]	Replication, recombination and repair	--	K12823|0|mdm:103429292|K12823 ATP-dependent RNA helicase DDX5/DBP2 [EC:3.6.4.13] | (RefSeq) DEAD-box ATP-dependent RNA helicase 20-like	[A]	RNA processing and modification	DEAD-box ATP-dependent RNA helicase 30 OS=Arabidopsis thaliana OX=3702 GN=RH30 PE=1 SV=2	L	Replication, recombination and repair	PREDICTED: DEAD-box ATP-dependent RNA helicase 20-like [Malus domestica]
MD06G1177800	6.76156	4.58966	7.25213	4.52475	2.70982	2.3582	7.67048	3.94433	5.71634	3.85982	4.317	2.88427	--	--	--	--	[U]	Intracellular trafficking, secretion, and vesicular transport	Vesicle-associated protein 2-2 OS=Arabidopsis thaliana OX=3702 GN=PVA22 PE=1 SV=1	U	Intracellular trafficking, secretion, and vesicular transport	PREDICTED: vesicle-associated protein 2-2-like [Malus domestica]
MD08G1237600	1.10424	14.6294	89.6978	4.18528	4.72653	122.758	0.49393	0.993408	31.1468	0.082069	1.86906	88.9279	[E]	Amino acid transport and metabolism	Molecular Function: cysteine synthase activity (GO:0004124);; Molecular Function: copper ion binding (GO:0005507);; Cellular Component: mitochondrion (GO:0005739);; Biological Process: glycolytic process (GO:0006096);; Biological Process: cysteine biosynthetic process from serine (GO:0006535);; Biological Process: water transport (GO:0006833);; Biological Process: hyperosmotic response (GO:000697…	K13034|0|mdm:103405317|K13034 L-3-cyanoalanine synthase/ cysteine synthase [EC:2.5.1.47 4.4.1.9] | (RefSeq) CAS2, MdCAS2; L-3-cyanoalanine synthase 2, mitochondrial	[E]	Amino acid transport and metabolism	L-3-cyanoalanine synthase 2, mitochondrial OS=Malus domestica OX=3750 GN=CAS2 PE=1 SV=1	E	Amino acid transport and metabolism	L-3-cyanoalanine synthase 2, mitochondrial [Malus domestica]
MD04G1079400	9.64204	3.80533	13.6873	4.15424	3.49736	3.69339	7.0176	7.88532	12.1042	2.54919	3.8513	2.69019	[K]	Transcription	Molecular Function: hydrolase activity (GO:0016787);;	--	[R]	General function prediction only	Plant intracellular Ras-group-related LRR protein 1 OS=Arabidopsis thaliana OX=3702 GN=PIRL1 PE=2 SV=1	S	Function unknown	PREDICTED: plant intracellular Ras-group-related LRR protein 1-like [Malus domestica]
MD10G1341100	4.80997	7.29421	7.04534	4.09993	2.92387	2.55121	3.56852	4.81466	6.25666	6.6097	6.34022	2.68981	--	--	--	--	--	--	--	S	Function unknown	PREDICTED: uncharacterized protein LOC103456203 isoform X5 [Malus domestica]
MD05G1171800	12.5522	4.31399	5.90158	4.04596	7.24747	12.2647	15.747	7.95968	6.75774	2.79882	4.99311	4.45596	--	--	--	--	--	--	--	S	Function unknown	PREDICTED: surfeit locus protein 2 isoform X1 [Pyrus x bretschneideri]
MD03G1076400	3.40469	8.4924	6.62008	4.01239	1.33535	0.600441	1.62434	2.40369	7.46351	5.27232	3.71975	1.68593	--	--	--	--	--	--	--	S	Function unknown	PREDICTED: cucumber peeling cupredoxin-like [Malus domestica]
MD13G1132300	1.29699	10.0241	19.1512	3.53593	6.98217	1.85413	0.078661	0.288546	18.1198	3.03107	2.66314	19.0185	[G]	Carbohydrate transport and metabolism	Biological Process: carbohydrate metabolic process (GO:0005975);; Molecular Function: cellulase activity (GO:0008810);; Molecular Function: carbohydrate binding (GO:0030246);;	--	--	--	Endoglucanase 6 OS=Arabidopsis thaliana OX=3702 GN=At1g64390 PE=2 SV=2	G	Carbohydrate transport and metabolism	PREDICTED: endoglucanase 6-like [Malus domestica]
MD06G1206600	3.15293	3.11521	5.19161	3.46701	5.15426	4.70104	3.48653	2.69759	6.34511	1.87547	2.22432	3.78629	[T]	Signal transduction mechanisms	--	K18039|0|mdm:103429478|K18039 tyrosine-protein phosphatase non-receptor type 20 [EC:3.1.3.48] | (RefSeq) protein-tyrosine-phosphatase PTP1-like	[T]	Signal transduction mechanisms	Protein-tyrosine-phosphatase PTP1 OS=Arabidopsis thaliana OX=3702 GN=PTP1 PE=1 SV=1	T	Signal transduction mechanisms	PREDICTED: protein-tyrosine-phosphatase PTP1-like [Malus domestica]
MD04G1138900	11.9882	11.2717	14.3604	3.41624	6.5189	4.07825	14.7259	13.5733	17.3252	3.34388	6.18037	5.22199	--	--	Biological Process: response to superoxide (GO:0000303);; Molecular Function: aspartic-type endopeptidase activity (GO:0004190);; Biological Process: postreplication repair (GO:0006301);; Biological Process: N-terminal protein myristoylation (GO:0006499);; Biological Process: ubiquitin-dependent protein catabolic process (GO:0006511);; Biological Process: fatty acid beta-oxidation (GO:0006635);; …	--	[O]	Posttranslational modification, protein turnover, chaperones	Aspartic proteinase-like protein 2 OS=Arabidopsis thaliana OX=3702 GN=At1g65240 PE=1 SV=2	O	Posttranslational modification, protein turnover, chaperones	PREDICTED: aspartic proteinase-like protein 2 [Malus domestica]
MD04G1135600	92.3155	31.3191	22.2352	3.28641	8.40916	13.4703	98.6451	94.6368	27.1647	3.82628	5.40816	6.2516	[T]	Signal transduction mechanisms	Cellular Component: mitochondrion (GO:0005739);; Biological Process: glycolytic process (GO:0006096);; Biological Process: water transport (GO:0006833);; Biological Process: hyperosmotic response (GO:0006972);; Biological Process: Golgi organization (GO:0007030);; Biological Process: response to temperature stimulus (GO:0009266);; Biological Process: response to salt stress (GO:0009651);; Molecul…	--	--	--	CBS domain-containing protein CBSX3, mitochondrial OS=Arabidopsis thaliana OX=3702 GN=CBSX3 PE=1 SV=1	S	Function unknown	PREDICTED: CBS domain-containing protein CBSX3, mitochondrial-like [Malus domestica]
MD10G1256100	3.89564	3.00816	4.92624	3.14691	5.35534	14.0419	3.855	4.22952	5.52841	0.78104	3.25655	7.92688	--	--	--	--	--	--	O-fucosyltransferase 7 OS=Arabidopsis thaliana OX=3702 GN=OFUT7 PE=2 SV=1	S	Function unknown	PREDICTED: uncharacterized protein At1g04910-like isoform X1 [Malus domestica]
MD06G1105900	6.76305	13.3357	18.5002	3.13286	5.4729	5.75121	6.3289	6.78309	16.1474	4.77459	3.57101	5.21213	[U]	Intracellular trafficking, secretion, and vesicular transport	Biological Process: signal peptide processing (GO:0006465);; Biological Process: proteolysis (GO:0006508);; Molecular Function: peptidase activity (GO:0008233);; Cellular Component: integral component of membrane (GO:0016021);;	K13280|5.27805e-112|pxb:103936720|K13280 signal peptidase, endoplasmic reticulum-type [EC:3.4.-.-] | (RefSeq) signal peptidase complex catalytic subunit SEC11C-like	[U]	Intracellular trafficking, secretion, and vesicular transport	--	U	Intracellular trafficking, secretion, and vesicular transport	PREDICTED: signal peptidase complex catalytic subunit SEC11C-like [Pyrus x bretschneideri]
MD09G1141100	4.90527	3.48	3.06024	3.12189	2.82001	1.96162	5.83938	5.94321	3.58714	4.27195	3.69266	1.51288	--	--	--	--	--	--	--	S	Function unknown	PREDICTED: uncharacterized protein LOC103440207 [Malus domestica]
MD15G1061100	11.6376	17.1597	17.7769	3.1199	1.87064	1.37492	14.3665	12.5057	19.6152	5.12415	4.06984	1.91613	--	--	--	--	--	--	AT-hook motif nuclear-localized protein 1 OS=Arabidopsis thaliana OX=3702 GN=AHL1 PE=1 SV=1	S	Function unknown	PREDICTED: AT-hook motif nuclear-localized protein 6 [Malus domestica]
MD13G1193200	4.2998	6.37531	4.66286	3.00264	4.73914	2.40068	1.93373	4.61621	4.97597	4.37719	4.00049	3.72735	--	--	Cellular Component: cytosol (GO:0005829);;	--	--	--	--	S	Function unknown	PREDICTED: uncharacterized protein LOC103437338 isoform X1 [Malus domestica]
MD13G1044800	2.95406	2.47285	3.752	2.97069	15.3408	13.5318	0.834817	1.66797	4.01421	0.997767	1.45996	10.5786	--	--	Biological Process: cell differentiation (GO:0030154);;	--	[S]	Function unknown	Protein NDL1 OS=Arabidopsis thaliana OX=3702 GN=NDL1 PE=1 SV=1	S	Function unknown	PREDICTED: pollen-specific protein SF21-like [Malus domestica]
MD10G1034400	3.11365	4.71017	11.2383	2.89726	2.61683	3.46948	2.90504	1.46524	7.05027	1.75343	3.19261	3.33895	[O]	Posttranslational modification, protein turnover, chaperones	Molecular Function: acid-amino acid ligase activity (GO:0016881);;	K10576|2.21389e-112|mdm:103455242|K10576 ubiquitin-conjugating enzyme E2 H [EC:2.3.2.23] | (RefSeq) ubiquitin-conjugating enzyme E2-23 kDa-like	[O]	Posttranslational modification, protein turnover, chaperones	Ubiquitin-conjugating enzyme E2 4 OS=Arabidopsis thaliana OX=3702 GN=UBC4 PE=2 SV=2	O	Posttranslational modification, protein turnover, chaperones	PREDICTED: ubiquitin-conjugating enzyme E2-23 kDa-like [Malus domestica]
MD05G1037800	4.93824	4.89697	4.19695	2.62145	5.32404	2.95293	1.69622	3.1207	3.48241	2.12123	1.46206	4.69369	[Q]	Secondary metabolites biosynthesis, transport and catabolism	Biological Process: fatty acid biosynthetic process (GO:0006633);; Biological Process: response to osmotic stress (GO:0006970);; Biological Process: response to cold (GO:0009409);; Biological Process: response to light stimulus (GO:0009416);; Biological Process: response to wounding (GO:0009611);; Molecular Function: fatty acid elongase activity (GO:0009922);; Biological Process: suberin biosynth…	K15397|0|mdm:103424071|K15397 3-ketoacyl-CoA synthase [EC:2.3.1.199] | (RefSeq) 3-ketoacyl-CoA synthase 20-like	--	--	3-ketoacyl-CoA synthase 2 OS=Arabidopsis thaliana OX=3702 GN=KCS2 PE=2 SV=2	I	Lipid transport and metabolism	PREDICTED: 3-ketoacyl-CoA synthase 20-like isoform X1 [Malus domestica]
MD08G1250100	4.76057	3.29747	2.99787	2.53448	2.46487	2.61036	3.19381	3.55128	3.78316	2.0708	2.79265	1.32718	[S]	Function unknown	--	--	[R]	General function prediction only	Phosphatidylinositol 4-phosphate 5-kinase 1 OS=Arabidopsis thaliana OX=3702 GN=PIP5K1 PE=1 SV=1	S	Function unknown	PREDICTED: uncharacterized protein LOC103406614 [Malus domestica]
MD01G1155800	1.50653	3.24802	2.16286	2.31336	2.11557	1.67976	5.82617	8.59985	2.82781	0.756457	2.44926	2.01659	[G]	Carbohydrate transport and metabolism	--	--	--	--	Glucan endo-1,3-beta-glucosidase 5 OS=Arabidopsis thaliana OX=3702 GN=At4g31140 PE=1 SV=1	S	Function unknown	PREDICTED: glucan endo-1,3-beta-glucosidase 6 [Malus domestica]
MD01G1112300	2.87739	3.30328	4.50924	2.07051	3.09201	2.83779	2.73166	1.83414	2.35593	3.986	2.74418	2.92183	--	--	Molecular Function: GTPase activator activity (GO:0008060);; Molecular Function: zinc ion binding (GO:0008270);; Biological Process: regulation of GTPase activity (GO:0032312);;	K12492|0|mdm:103408374|K12492 ADP-ribosylation factor GTPase-activating protein 1 | (RefSeq) probable ADP-ribosylation factor GTPase-activating protein AGD6	[TUZ]	--	Probable ADP-ribosylation factor GTPase-activating protein AGD6 OS=Arabidopsis thaliana OX=3702 GN=AGD6 PE=1 SV=1	U	Intracellular trafficking, secretion, and vesicular transport	PREDICTED: probable ADP-ribosylation factor GTPase-activating protein AGD6 [Malus domestica]
MD08G1123400	2.24648	2.12579	3.02754	1.99997	0.767672	0.879842	2.63854	1.61414	2.11351	2.25507	2.24943	0.942116	[O]	Posttranslational modification, protein turnover, chaperones	--	--	[O]	Posttranslational modification, protein turnover, chaperones	Uncharacterized protein At5g39865 OS=Arabidopsis thaliana OX=3702 GN=At5g39865 PE=2 SV=1	O	Posttranslational modification, protein turnover, chaperones	PREDICTED: uncharacterized protein At5g39865 [Malus domestica]
MD11G1091700	4.39198	4.41024	3.88256	1.81307	1.60882	1.50347	4.23602	4.9306	3.47576	2.81775	2.20054	1.39543	[N]	Cell motility	Cellular Component: endosome (GO:0005768);; Cellular Component: trans-Golgi network (GO:0005802);; Biological Process: cell tip growth (GO:0009932);; Biological Process: carbohydrate biosynthetic process (GO:0016051);; Molecular Function: cellulose synthase activity (GO:0016759);; Biological Process: cellulose metabolic process (GO:0030243);; Biological Process: root hair cell differentiation (GO…	--	--	--	Probable xyloglucan glycosyltransferase 6 OS=Arabidopsis thaliana OX=3702 GN=CSLC6 PE=1 SV=1	M	Cell wall/membrane/envelope biogenesis	PREDICTED: probable xyloglucan glycosyltransferase 6 [Malus domestica]
MD09G1248700	13.6456	23.7651	38.8798	1.74744	1.87358	2.78371	15.3567	15.3482	28.367	0.782704	1.25721	3.49053	[IQR]	--	Molecular Function: nucleotide binding (GO:0000166);; Molecular Function: protochlorophyllide reductase activity (GO:0016630);; Biological Process: oxidation-reduction process (GO:0055114);;	--	[Q]	Secondary metabolites biosynthesis, transport and catabolism	Short-chain dehydrogenase TIC 32, chloroplastic OS=Arabidopsis thaliana OX=3702 GN=TIC32 PE=2 SV=1	S	Function unknown	PREDICTED: short-chain dehydrogenase TIC 32, chloroplastic [Malus domestica]
MD06G1234600	2.9765	2.80593	3.34998	1.5603	0.980452	0.806187	2.36663	2.57831	3.87246	0.654047	0.463554	0.598535	[Q]	Secondary metabolites biosynthesis, transport and catabolism	Molecular Function: oxidoreductase activity (GO:0016491);;	--	[QR]	--	Gibberellin 2-beta-dioxygenase 8 OS=Arabidopsis thaliana OX=3702 GN=GA2OX8 PE=1 SV=2	S	Function unknown	PREDICTED: gibberellin 2-beta-dioxygenase 8-like [Pyrus x bretschneideri]
MD13G1207000	40.8265	100.922	87.3765	1.46237	7.1919	11.3215	6.43091	29.489	77.0556	0.159519	0.383253	4.51915	[G]	Carbohydrate transport and metabolism	Molecular Function: hydrolase activity, hydrolyzing O-glycosyl compounds (GO:0004553);; Cellular Component: cell wall (GO:0005618);; Biological Process: cellular glucan metabolic process (GO:0006073);; Molecular Function: xyloglucan:xyloglucosyl transferase activity (GO:0016762);; Cellular Component: apoplast (GO:0048046);;	K08235|0|mdm:103443395|K08235 xyloglucan:xyloglucosyl transferase [EC:2.4.1.207] | (RefSeq) xyloglucan endotransglucosylase/hydrolase 2	--	--	Xyloglucan endotransglucosylase/hydrolase 2 OS=Glycine max OX=3847 PE=2 SV=1	G	Carbohydrate transport and metabolism	PREDICTED: xyloglucan endotransglucosylase/hydrolase 2 [Malus domestica]
MD09G1179100	1.01749	66.7386	103.543	1.42086	0.137492	0.064191	0.971933	1.22013	110.887	0.931686	0.45724	0.159313	[G]	Carbohydrate transport and metabolism	--	K01188|0|mdm:103447062|K01188 beta-glucosidase [EC:3.2.1.21] | (RefSeq) beta-glucosidase 12-like	[G]	Carbohydrate transport and metabolism	Beta-glucosidase 12 OS=Oryza sativa subsp. indica OX=39946 GN=BGLU12 PE=3 SV=1	G	Carbohydrate transport and metabolism	PREDICTED: beta-glucosidase 12-like [Malus domestica]
MD13G1181400	9.64759	5.82437	14.6899	1.33622	1.17008	0.795771	5.00179	4.22011	16.9333	0.458182	1.1144	1.02107	[G]	Carbohydrate transport and metabolism	--	--	[G]	Carbohydrate transport and metabolism	Adenosine kinase OS=Physcomitrella patens subsp. patens OX=3218 GN=ADK PE=2 SV=1	G	Carbohydrate transport and metabolism	PREDICTED: uncharacterized sugar kinase slr0537-like isoform X2 [Malus domestica]
MD14G1122900	2.82003	4.67818	7.05359	1.32515	3.43111	4.1835	0.512561	2.43456	5.91247	0.225109	1.73414	5.17451	--	--	--	--	[I]	Lipid transport and metabolism	Phosphatidylinositol/phosphatidylcholine transfer protein SFH1 OS=Arabidopsis thaliana OX=3702 GN=SFH1 PE=2 SV=1	S	Function unknown	PREDICTED: phosphatidylinositol/phosphatidylcholine transfer protein SFH1 [Malus domestica]
MD04G1205200	2.53766	2.77033	4.30039	1.26153	1.84063	2.79729	2.99428	2.07225	3.97549	4.26083	3.58494	1.99029	--	--	--	--	--	--	Dof zinc finger protein DOF5.1 OS=Arabidopsis thaliana OX=3702 GN=DOF5.1 PE=2 SV=1	S	Function unknown	PREDICTED: dof zinc finger protein DOF3.6-like [Pyrus x bretschneideri]
MD02G1221500	7.94266	14.0192	10.1285	1.18773	4.35995	1.96729	0.756837	2.4898	8.816	1.29346	1.60238	3.20881	[K]	Transcription	--	--	--	--	Leucine-rich repeat extensin-like protein 4 OS=Arabidopsis thaliana OX=3702 GN=LRX4 PE=1 SV=1	S	Function unknown	PREDICTED: leucine-rich repeat extensin-like protein 3 [Pyrus x bretschneideri]
MD10G1191900	4.66861	4.43647	4.70906	1.13512	1.91521	1.76541	2.37578	3.18125	3.75073	0.329394	0.488877	2.29965	[L]	Replication, recombination and repair	Biological Process: base-excision repair (GO:0006284);; Molecular Function: DNA-3-methyladenine glycosylase activity (GO:0008725);;	K01246|0|mdm:103446994|K01246 DNA-3-methyladenine glycosylase I [EC:3.2.2.20] | (RefSeq) probable GMP synthase [glutamine-hydrolyzing]	--	--	--	L	Replication, recombination and repair	PREDICTED: probable GMP synthase [glutamine-hydrolyzing] [Malus domestica]
MD07G1258900	1.13962	1.59934	2.61184	1.12146	0.68395	0.250564	0	0	0.710874	0.417374	0.482307	0.660423	--	--	Molecular Function: catalytic activity (GO:0003824);; Biological Process: metabolic process (GO:0008152);;	--	--	--	--	S	Function unknown	PREDICTED: uncharacterized protein LOC103435857 [Malus domestica]
MD10G1132900	53.0321	73.092	46.3341	0.825729	0.50888	0.568793	97.8421	51.7344	32.859	0.284515	0.560673	0.361617	--	--	Cellular Component: integral component of membrane (GO:0016021);;	--	[E]	Amino acid transport and metabolism	Lysine histidine transporter-like 8 OS=Arabidopsis thaliana OX=3702 GN=AATL1 PE=1 SV=1	E	Amino acid transport and metabolism	PREDICTED: lysine histidine transporter-like 8 [Malus domestica]
MD09G1287000	1.52945	2.87466	4.23285	0.604169	1.98188	1.32508	1.09944	1.91844	3.22064	0.50149	0.489047	2.52443	[R]	General function prediction only	--	--	--	--	Protein SUPPRESSOR OF QUENCHING 1, chloroplastic OS=Arabidopsis thaliana OX=3702 GN=SOQ1 PE=1 SV=1	S	Function unknown	PREDICTED: uncharacterized protein LOC103448781 isoform X1 [Malus domestica]
MD10G1045300	4.1052	0.421596	3.01246	0.388304	0.555607	1.64823	2.87505	2.91038	2.9702	0.238142	0.565367	0.60363	[E]	Amino acid transport and metabolism	Molecular Function: glutamate dehydrogenase [NAD(P)+] activity (GO:0004353);; Molecular Function: copper ion binding (GO:0005507);; Molecular Function: ATP binding (GO:0005524);; Cellular Component: mitochondrion (GO:0005739);; Biological Process: cellular amino acid metabolic process (GO:0006520);; Molecular Function: zinc ion binding (GO:0008270);; Biological Process: response to absence of lig…	K00261|1.08273e-44|mdm:103452065|K00261 glutamate dehydrogenase (NAD(P)+) [EC:1.4.1.3] | (RefSeq) glutamate dehydrogenase 1-like	[E]	Amino acid transport and metabolism	Glutamate dehydrogenase 1 OS=Arabidopsis thaliana OX=3702 GN=GDH1 PE=2 SV=1	E	Amino acid transport and metabolism	PREDICTED: glutamate dehydrogenase 1-like isoform X1 [Malus domestica]
MD04G1205500	0.932166	7.16487	18.6648	0.272523	1.51156	2.13446	0	0.214505	14.0881	0	0.342796	17.7407	[G]	Carbohydrate transport and metabolism	Cellular Component: membrane (GO:0016020);; Molecular Function: lyase activity (GO:0016829);;	K01728|0|mdm:103437645|K01728 pectate lyase [EC:4.2.2.2] | (RefSeq) probable pectate lyase 18	--	--	Probable pectate lyase 22 OS=Arabidopsis thaliana OX=3702 GN=At5g63180 PE=2 SV=1	G	Carbohydrate transport and metabolism	probable pectate lyase 18 precursor [Malus domestica]
MD00G1178300	2.05896	3.71179	9.42352	0.24417	4.78371	8.26988	0.141605	0.433735	5.91137	0.08461	0.636826	6.7317	[DPM]	--	Molecular Function: copper ion binding (GO:0005507);; Molecular Function: L-ascorbate oxidase activity (GO:0008447);; Biological Process: plant-type secondary cell wall biogenesis (GO:0009834);; Biological Process: lignin catabolic process (GO:0046274);; Cellular Component: apoplast (GO:0048046);; Molecular Function: hydroquinone:oxygen oxidoreductase activity (GO:0052716);; Biological Process: o…	K05909|0|mdm:103427122|K05909 laccase [EC:1.10.3.2] | (RefSeq) laccase-4-like	[Q]	Secondary metabolites biosynthesis, transport and catabolism	Laccase-4 OS=Arabidopsis thaliana OX=3702 GN=IRX12 PE=2 SV=2	Q	Secondary metabolites biosynthesis, transport and catabolism	PREDICTED: laccase-4 [Malus domestica]
MD08G1148200	6.38854	3.79471	12.5002	0.174468	0.36105	0.235986	3.18042	6.30201	9.3016	0.384785	0.54941	0.163242	--	--	Molecular Function: peroxidase activity (GO:0004601);; Molecular Function: copper ion binding (GO:0005507);; Molecular Function: calcium ion binding (GO:0005509);; Molecular Function: ATP binding (GO:0005524);; Molecular Function: calcium-dependent phospholipid binding (GO:0005544);; Cellular Component: cell wall (GO:0005618);; Cellular Component: mitochondrion (GO:0005739);; Cellular Component: …	--	[U]	Intracellular trafficking, secretion, and vesicular transport	Annexin D1 OS=Arabidopsis thaliana OX=3702 GN=ANN1 PE=1 SV=1	S	Function unknown	PREDICTED: annexin D1-like [Malus domestica]
MD01G1052800	2.88083	6.10332	18.3433	0.174172	14.8536	13.1156	0.014696	0.059307	10.4546	0.03764	0.03954	6.75498	[P]	Inorganic ion transport and metabolism	Molecular Function: copper ion binding (GO:0005507);; Biological Process: plant-type secondary cell wall biogenesis (GO:0009834);; Biological Process: lignin catabolic process (GO:0046274);; Cellular Component: apoplast (GO:0048046);; Molecular Function: hydroquinone:oxygen oxidoreductase activity (GO:0052716);; Biological Process: oxidation-reduction process (GO:0055114);;	K05909|0|mdm:103450543|K05909 laccase [EC:1.10.3.2] | (RefSeq) laccase-4-like	[Q]	Secondary metabolites biosynthesis, transport and catabolism	Laccase-4 OS=Arabidopsis thaliana OX=3702 GN=IRX12 PE=2 SV=2	Q	Secondary metabolites biosynthesis, transport and catabolism	PREDICTED: laccase-4-like [Malus domestica]
MD12G1213700	22.1962	5.6803	29.1892	0.159104	0.209721	0.365876	28.6909	38.5436	34.7139	0.148754	0.729173	0.323277	--	--	Cellular Component: membrane (GO:0016020);;	--	--	--	WAT1-related protein At5g07050 OS=Arabidopsis thaliana OX=3702 GN=At5g07050 PE=2 SV=1	U	Intracellular trafficking, secretion, and vesicular transport	PREDICTED: WAT1-related protein At1g43650-like [Malus domestica]
MD03G1066600	3.11895	4.87467	9.17863	0.157215	4.0351	5.25062	0.252	0.048793	9.99348	0	0	5.5806	--	--	Biological Process: glucuronoxylan metabolic process (GO:0010413);; Biological Process: xylan biosynthetic process (GO:0045492);;	--	--	--	--	S	Function unknown	PREDICTED: interaptin-like [Malus domestica]
MD15G1220700	0.68439	1.17726	2.73721	0.155202	2.14019	4.29258	0	0.07564	1.72696	0	0	2.7149	--	--	Molecular Function: transferase activity (GO:0016740);;	K20869|0|mdm:103450082|K20869 putative beta-1,4-xylosyltransferase IRX9 [EC:2.4.2.-] | (RefSeq) probable beta-1,4-xylosyltransferase IRX9	[O]	Posttranslational modification, protein turnover, chaperones	Probable beta-1,4-xylosyltransferase IRX9 OS=Arabidopsis thaliana OX=3702 GN=IRX9 PE=2 SV=1	S	Function unknown	PREDICTED: probable beta-1,4-xylosyltransferase IRX9 [Malus domestica]
MD06G1126900	43.7647	19.0122	27.7913	0.135667	0.529525	0.307161	38.6011	43.6101	104.865	2.55334	0.327209	1.31694	--	--	Biological Process: dephosphorylation (GO:0016311);; Molecular Function: pyrophosphatase activity (GO:0016462);; Molecular Function: phosphatase activity (GO:0016791);;	K13248|0|mdm:103424640|K13248 pyridoxal phosphate phosphatase PHOSPHO2 [EC:3.1.3.74] | (RefSeq) inorganic pyrophosphatase 2-like	[R]	General function prediction only	Inorganic pyrophosphatase 2 OS=Arabidopsis thaliana OX=3702 GN=At1g17710 PE=2 SV=1	S	Function unknown	PREDICTED: inorganic pyrophosphatase 2-like [Malus domestica]
MD05G1186700	1.68407	6.34692	7.4868	0.091188	0.101134	0	0.158506	0.365003	6.41376	0	0	0.460458	--	--	--	--	--	--	BAG family molecular chaperone regulator 2 OS=Arabidopsis thaliana OX=3702 GN=BAG2 PE=1 SV=1	O	Posttranslational modification, protein turnover, chaperones	PREDICTED: BAG family molecular chaperone regulator 2-like [Pyrus x bretschneideri]
MD08G1004300	5.51877	27.5778	30.0129	0.052093	0.039593	0.032165	1.95565	2.53911	38.8142	0.010742	0.047954	0.009797	--	--	--	K16276|0|mdm:103420571|K16276 zinc finger protein-like protein | (RefSeq) uncharacterized LOC103420571	[R]	General function prediction only	Zinc finger protein BRUTUS OS=Arabidopsis thaliana OX=3702 GN=BTS PE=1 SV=1	S	Function unknown	PREDICTED: uncharacterized protein LOC103420571 [Malus domestica]
MD11G1193400	3.31316	4.48686	5.86813	0.013608	0.093767	0.011466	0.045966	0.180715	7.07255	0	0	0.137041	--	--	Biological Process: pollen tube growth (GO:0009860);;	--	--	--	BTB/POZ domain-containing protein At1g03010 OS=Arabidopsis thaliana OX=3702 GN=At1g03010 PE=2 SV=1	S	Function unknown	PREDICTED: BTB/POZ domain-containing protein At1g03010-like isoform X1 [Malus domestica]
MD03G1268200	3.08093	0.014471	2.85448	0.007617	0.003134	0.012664	4.75144	4.46346	3.44722	0.020878	0.003582	0.003732	--	--	--	--	--	--	--	--	--	PREDICTED: probable pectinesterase 48 [Malus domestica]
Md/Mb leaf-to-root	Md/Mb +3 d r1	Md/Mb +3 d r2	Md/Mb +3 d r3	Md/Mb +3 d L1	Md/Mb +3 d L2	Md/Mb +3 d L3	Md/Mb -3 d r1	Md/Mb -3 d r2	Md/Mb -3 d r3	Md/Mb -3 d L1	Md/Mb -3 d L2	Md/Mb -3 d L3	COG_class	COG_class_annotation	GO_annotation	KEGG_annotation	KOG_class	KOG_class_annotation	Swissprot_annotation	eggNOG_class	eggNOG_class_annotation	nr_annotation
MD13G1192700	7.43931	8.49083	6.9258	730.757	1718.73	526.24	4.6698	3.40022	7.04299	557.299	323.258	463.018	[C]	Energy production and conversion	Molecular Function: copper ion binding (GO:0005507);; Molecular Function: electron carrier activity (GO:0009055);;	K02638|1.78084e-83|mdm:103420850|K02638 plastocyanin | (RefSeq) plastocyanin	--	--	Plastocyanin, chloroplastic OS=Solanum lycopersicum OX=4081 GN=PETE PE=2 SV=1	C	Energy production and conversion	PREDICTED: plastocyanin [Malus domestica]
MD02G1096100	54.9775	210.712	86.6635	663.352	258.725	544.132	98.5459	96.8745	104.185	459.789	473.484	567.635	--	--	--	K13464|0|mdm:103451320|K13464 jasmonate ZIM domain-containing protein | (RefSeq) protein TIFY 10A	--	--	Protein TIFY 10A OS=Arabidopsis thaliana OX=3702 GN=TIFY10A PE=1 SV=1	S	Function unknown	PREDICTED: protein TIFY 10A [Malus domestica]
MD14G1047800	75.2772	82.5209	70.4072	477.579	885.495	421.413	30.3627	48.8774	59.7382	331.565	266.651	347.475	--	--	Molecular Function: calcium ion binding (GO:0005509);; Molecular Function: poly(U) RNA binding (GO:0008266);; Cellular Component: chloroplast thylakoid membrane (GO:0009535);; Cellular Component: chloroplast stroma (GO:0009570);; Cellular Component: photosystem II oxygen evolving complex (GO:0009654);; Cellular Component: chloroplast envelope (GO:0009941);; Biological Process: photosynthesis (GO:…	K02717|7.7197e-178|mdm:103443153|K02717 photosystem II oxygen-evolving enhancer protein 2 | (RefSeq) oxygen-evolving enhancer protein 2, chloroplastic-like	--	--	Oxygen-evolving enhancer protein 2, chloroplastic OS=Cucumis sativus OX=3659 GN=PSBP PE=2 SV=1	S	Function unknown	PREDICTED: oxygen-evolving enhancer protein 2, chloroplastic-like [Malus domestica]
MD07G1118800	14.141	8.58844	6.6125	330.239	292.9	293.377	18.1385	13.4078	13.255	279.832	316.059	408.905	[E]	Amino acid transport and metabolism	Cellular Component: cytoplasm (GO:0005737);; Biological Process: L-phenylalanine catabolic process (GO:0006559);; Biological Process: cinnamic acid biosynthetic process (GO:0009800);; Molecular Function: phenylalanine ammonia-lyase activity (GO:0045548);;	K10775|0|mdm:103433222|K10775 phenylalanine ammonia-lyase [EC:4.3.1.24] | (RefSeq) phenylalanine ammonia-lyase 1-like	[Q]	Secondary metabolites biosynthesis, transport and catabolism	Phenylalanine ammonia-lyase 1 OS=Prunus avium OX=42229 GN=PAL1 PE=2 SV=1	E	Amino acid transport and metabolism	PREDICTED: phenylalanine ammonia-lyase 1-like [Malus domestica]
MD04G1187100	4.58767	4.46612	6.93958	305.855	678.1	257.906	4.35814	4.71318	5.6686	211.87	145.823	242.515	--	--	Cellular Component: photosystem I (GO:0009522);;	K02693|5.06606e-67|mdm:103428016|K02693 photosystem I subunit IV | (RefSeq) photosystem I reaction center subunit IV B, chloroplastic-like	--	--	Photosystem I reaction center subunit IV A, chloroplastic OS=Nicotiana sylvestris OX=4096 GN=PSAEA PE=1 SV=1	C	Energy production and conversion	PREDICTED: photosystem I reaction center subunit IV B, chloroplastic-like [Malus domestica]
MD11G1066100	11.108	8.38888	10.3937	192.147	5.88592	135.514	8.37247	7.13799	8.08397	183.346	194.057	45.227	--	--	Molecular Function: aspartic-type endopeptidase activity (GO:0004190);; Biological Process: proteolysis (GO:0006508);;	--	[O]	Posttranslational modification, protein turnover, chaperones	Basic 7S globulin OS=Glycine max OX=3847 GN=BG PE=1 SV=2	O	Posttranslational modification, protein turnover, chaperones	PREDICTED: basic 7S globulin-like [Malus domestica]
MD06G1189200	558.984	390.667	283.865	124.29	165.124	99.9173	773.576	670.204	673.63	99.2601	79.3652	75.677	[O]	Posttranslational modification, protein turnover, chaperones	Molecular Function: ubiquitin-protein transferase activity (GO:0004842);; Biological Process: protein ubiquitination (GO:0016567);;	K10573|2.97327e-103|mtr:MTR_8g468530|K10573 ubiquitin-conjugating enzyme E2 A [EC:2.3.2.23] | (RefSeq) ubiquitin-conjugating enzyme	[O]	Posttranslational modification, protein turnover, chaperones	Ubiquitin-conjugating enzyme E2 2 OS=Arabidopsis thaliana OX=3702 GN=UBC2 PE=2 SV=1	O	Posttranslational modification, protein turnover, chaperones	PREDICTED: ubiquitin-conjugating enzyme E2 2 isoform X1 [Gossypium hirsutum]
MD09G1184000	3.21577	11.2764	3.58084	118.937	72.6157	140.006	0.46888	1.79517	0.559085	168.199	184.863	204.666	[V]	Defense mechanisms	Biological Process: drug transmembrane transport (GO:0006855);; Molecular Function: drug transmembrane transporter activity (GO:0015238);; Molecular Function: antiporter activity (GO:0015297);; Cellular Component: membrane (GO:0016020);;	--	[R]	General function prediction only	Protein DETOXIFICATION 35 OS=Arabidopsis thaliana OX=3702 GN=DTX35 PE=1 SV=1	V	Defense mechanisms	PREDICTED: protein DETOXIFICATION 35-like isoform X3 [Pyrus x bretschneideri]
MD14G1145500	69.6623	79.0863	110.473	92.9124	57.583	108.64	61.0585	56.854	113.558	108.393	150.426	123.14	[G]	Carbohydrate transport and metabolism	Molecular Function: phosphoglycerate mutase activity (GO:0004619);; Cellular Component: cytoplasm (GO:0005737);; Biological Process: glycolytic process (GO:0006096);; Biological Process: response to stress (GO:0006950);; Molecular Function: manganese ion binding (GO:0030145);;	K15633|0|mdm:103450793|K15633 2,3-bisphosphoglycerate-independent phosphoglycerate mutase [EC:5.4.2.12] | (RefSeq) 2,3-bisphosphoglycerate-independent phosphoglycerate mutase	[G]	Carbohydrate transport and metabolism	2,3-bisphosphoglycerate-independent phosphoglycerate mutase OS=Mesembryanthemum crystallinum OX=3544 GN=PGM1 PE=2 SV=1	G	Carbohydrate transport and metabolism	PREDICTED: 2,3-bisphosphoglycerate-independent phosphoglycerate mutase [Malus domestica]
MD01G1222200	0	0	0	87.9937	62.4611	75.2831	0	0	0.121078	78.4707	88.3966	97.6562	--	--	Molecular Function: DNA binding (GO:0003677);; Molecular Function: chromatin binding (GO:0003682);;	K09422|0|mdm:103453608|K09422 myb proto-oncogene protein, plant | (RefSeq) MYB11; transcription repressor MYB6-like	[K]	Transcription	Transcription repressor MYB4 OS=Arabidopsis thaliana OX=3702 GN=MYB4 PE=1 SV=1	K	Transcription	uncharacterized protein LOC103453608 [Malus domestica]
MD07G1222300	9.29523	7.36025	7.74036	77.9295	37.0749	112.584	7.72315	7.63852	7.81609	87.8667	47.8513	59.472	[R]	General function prediction only	Molecular Function: ATP binding (GO:0005524);; Biological Process: obsolete ATP catabolic process (GO:0006200);; Molecular Function: ATPase activity (GO:0016887);;	K06185|0|mdm:103447918|K06185 ATP-binding cassette, subfamily F, member 2 | (RefSeq) ABC transporter F family member 1	[R]	General function prediction only	ABC transporter F family member 1 OS=Arabidopsis thaliana OX=3702 GN=ABCF1 PE=2 SV=1	S	Function unknown	PREDICTED: ABC transporter F family member 1 [Malus domestica]
MD09G1146300	29.3131	15.1056	42.1342	75.3856	31.0114	80.9845	64.6915	55.0125	53.1888	87.55	93.8786	72.1399	--	--	--	--	--	--	--	S	Function unknown	PREDICTED: uncharacterized protein LOC103962645 [Pyrus x bretschneideri]
MD04G1096200	10.4137	72.5933	27.8193	70.2082	98.6547	150.764	3.8375	5.84024	3.6168	104.766	99.8797	166.498	[R]	General function prediction only	Molecular Function: glutathione dehydrogenase (ascorbate) activity (GO:0045174);; Biological Process: oxidation-reduction process (GO:0055114);;	--	[P]	Inorganic ion transport and metabolism	Glutathione S-transferase DHAR2 OS=Arabidopsis thaliana OX=3702 GN=DHAR2 PE=1 SV=1	O	Posttranslational modification, protein turnover, chaperones	glutathione S-transferase DHAR2-like [Malus domestica]
MD11G1132800	36.1688	48.3464	42.3804	64.8838	125.479	36.7852	38.9283	34.5541	29.0197	58.5196	31.5783	43.6314	[G]	Carbohydrate transport and metabolism	Molecular Function: chitinase activity (GO:0004568);; Biological Process: carbohydrate metabolic process (GO:0005975);; Biological Process: chitin catabolic process (GO:0006032);; Biological Process: cell wall macromolecule catabolic process (GO:0016998);;	--	[R]	General function prediction only	Chitinase-like protein 1 OS=Arabidopsis thaliana OX=3702 GN=CTL1 PE=1 SV=1	G	Carbohydrate transport and metabolism	PREDICTED: chitinase-like protein 1 [Malus domestica]
MD10G1143600	13.4519	49.5846	8.14083	37.442	34.2414	40.5176	22.9638	20.8614	25.5611	51.6718	51.241	54.5858	--	--	Cellular Component: mitochondrial respiratory chain complex I (GO:0005747);; Biological Process: pentose-phosphate shunt (GO:0006098);; Biological Process: ubiquitin-dependent protein catabolic process (GO:0006511);; Cellular Component: chloroplast (GO:0009507);; Biological Process: response to salt stress (GO:0009651);; Biological Process: photorespiration (GO:0009853);; Molecular Function: oxid…	K03949|1.54703e-120|mdm:103439817|K03949 NADH dehydrogenase (ubiquinone) 1 alpha subcomplex subunit 5 | (RefSeq) probable NADH dehydrogenase [ubiquinone] 1 alpha subcomplex subunit 5, mitochondrial	[C]	Energy production and conversion	Probable NADH dehydrogenase [ubiquinone] 1 alpha subcomplex subunit 5, mitochondrial OS=Arabidopsis thaliana OX=3702 GN=At5g52840 PE=1 SV=1	I	Lipid transport and metabolism	PREDICTED: probable NADH dehydrogenase [ubiquinone] 1 alpha subcomplex subunit 5, mitochondrial [Malus domestica]
MD13G1232000	0.822516	3.87851	1.11679	36.7381	4.95222	31.4992	0	0.132516	0.140934	13.1291	8.8016	6.06068	[IR]	--	--	K08248|0|pxb:103954303|K08248 (R)-mandelonitrile lyase [EC:4.1.2.10] | (RefSeq) (R)-mandelonitrile lyase 2-like	[R]	General function prediction only	(R)-mandelonitrile lyase 3 OS=Prunus serotina OX=23207 GN=MDL3 PE=2 SV=1	E	Amino acid transport and metabolism	PREDICTED: (R)-mandelonitrile lyase 2-like [Pyrus x bretschneideri]
MD11G1310700	32.4468	26.2011	18.6795	32.8546	24.6556	29.2126	31.9812	26.7496	26.5085	36.2069	36.9828	41.1848	[O]	Posttranslational modification, protein turnover, chaperones	--	--	[O]	Posttranslational modification, protein turnover, chaperones	Oryzain alpha chain OS=Oryza sativa subsp. japonica OX=39947 GN=Os04g0650000 PE=1 SV=2	O	Posttranslational modification, protein turnover, chaperones	PREDICTED: low-temperature-induced cysteine proteinase-like [Malus domestica]
MD11G1315700	0.906108	32.0625	25.1735	32.1056	28.6479	41.6609	33.4383	31.8474	29.4526	35.5757	34.5012	42.4266	--	--	--	--	--	--	--	--	--	unknown [Lotus japonicus]
MD08G1049400	17.3123	5.8631	3.95349	27.4277	20.291	29.7721	6.16064	10.9104	7.93372	29.0179	39.0165	41.4933	[E]	Amino acid transport and metabolism	--	--	--	--	Stem-specific protein TSJT1 OS=Nicotiana tabacum OX=4097 GN=TSJT1 PE=2 SV=1	S	Function unknown	PREDICTED: stem-specific protein TSJT1-like [Malus domestica]
MD08G1001300	49.4077	24.6127	39.6864	25.8193	31.8956	33.8181	45.3903	41.4709	38.0774	28.4038	37.9593	32.2938	--	--	--	K09481|1.26956e-35|mdm:103418826|K09481 protein transport protein SEC61 subunit beta | (RefSeq) protein transport protein Sec61 subunit beta-like	[O]	Posttranslational modification, protein turnover, chaperones	Protein transport protein Sec61 subunit beta OS=Arabidopsis thaliana OX=3702 GN=At2g45070 PE=1 SV=1	U	Intracellular trafficking, secretion, and vesicular transport	PREDICTED: protein transport protein Sec61 subunit beta-like [Malus domestica]
MD03G1091100	11.9019	2.08657	37.2835	25.8182	28.0003	30.5405	14.5107	10.4688	19.2927	30.5572	37.2096	34.6423	[IQR]	--	Molecular Function: oxidoreductase activity (GO:0016491);; Biological Process: oxidation-reduction process (GO:0055114);;	K11147|5.15648e-142|mdm:103446766|K11147 dehydrogenase/reductase SDR family member 4 [EC:1.1.-.-] | (RefSeq) tropinone reductase-like 3	[R]	General function prediction only	Tropinone reductase-like 3 OS=Erythroxylum coca OX=289672 PE=2 SV=1	S	Function unknown	PREDICTED: tropinone reductase-like 3 [Malus domestica]
MD13G1147600	15.3197	22.4665	27.2889	22.3168	11.6217	23.2076	7.1669	9.0997	9.48	27.1756	30.3341	22.7703	[S]	Function unknown	Molecular Function: ion binding (GO:0043167);; Molecular Function: organic cyclic compound binding (GO:0097159);; Molecular Function: heterocyclic compound binding (GO:1901363);;	--	[KL]	--	Helicase-like transcription factor CHR28 OS=Arabidopsis thaliana OX=3702 GN=CHR28 PE=1 SV=1	L	Replication, recombination and repair	PREDICTED: helicase-like transcription factor CHR28 isoform X2 [Malus domestica]
MD07G1175900	2.71798	0.935729	5.48216	21.897	18.9223	25.1048	2.56176	1.71098	2.38097	23.967	25.388	24.6699	[O]	Posttranslational modification, protein turnover, chaperones	Molecular Function: ATP binding (GO:0005524);; Cellular Component: mitochondrion (GO:0005739);; Biological Process: protein folding (GO:0006457);; Biological Process: response to stress (GO:0006950);; Molecular Function: unfolded protein binding (GO:0051082);;	K03283|0|mdm:103436566|K03283 heat shock 70kDa protein 1/8 | (RefSeq) heat shock 70 kDa protein, mitochondrial	[O]	Posttranslational modification, protein turnover, chaperones	Heat shock 70 kDa protein, mitochondrial OS=Phaseolus vulgaris OX=3885 PE=2 SV=1	O	Posttranslational modification, protein turnover, chaperones	PREDICTED: heat shock 70 kDa protein, mitochondrial [Malus domestica]
MD08G1045800	9.09439	1.61881	5.88573	19.4927	19.4733	26.0085	5.13159	5.72014	5.57299	24.9449	29.0591	28.248	--	--	--	K04523|0|pxb:103962424|K04523 ubiquilin | (RefSeq) ubiquitin domain-containing protein DSK2a-like	[OR]	--	Ubiquitin domain-containing protein DSK2b OS=Arabidopsis thaliana OX=3702 GN=DSK2B PE=1 SV=1	O	Posttranslational modification, protein turnover, chaperones	PREDICTED: ubiquitin domain-containing protein DSK2a-like [Pyrus x bretschneideri]
MD01G1206300	16.4365	10.394	21.7866	19.1804	10.3308	13.8249	10.0693	13.8317	17.9144	10.6103	10.8741	9.28191	--	--	--	--	--	--	Transcription factor bHLH147 OS=Arabidopsis thaliana OX=3702 GN=BHLH147 PE=1 SV=1	K	Transcription	PREDICTED: transcription factor bHLH149-like [Malus domestica]
MD01G1177400	28.6387	14.8102	17.5458	19.1571	21.9947	16.4403	20.2903	22.8838	21.5128	20.1459	19.0987	13.9886	[J]	Translation, ribosomal structure and biogenesis	--	K13210|0|pxb:103967991|K13210 far upstream element-binding protein | (RefSeq) far upstream element-binding protein 2-like	[A]	RNA processing and modification	Protein BTR1 OS=Arabidopsis thaliana OX=3702 GN=BTR1 PE=1 SV=1	S	Function unknown	PREDICTED: far upstream element-binding protein 2-like isoform X1 [Pyrus x bretschneideri]
MD04G1030300	43.0441	322.742	82.2694	18.4497	22.1399	19.8972	42.2785	140.577	51.6146	18.4103	16.8894	14.8584	[J]	Translation, ribosomal structure and biogenesis	Molecular Function: structural constituent of ribosome (GO:0003735);; Cellular Component: ribosome (GO:0005840);; Biological Process: translation (GO:0006412);;	K02979|2.30825e-19|fve:101312744|K02979 small subunit ribosomal protein S28e | (RefSeq) 40S ribosomal protein S28	[J]	Translation, ribosomal structure and biogenesis	40S ribosomal protein S28 OS=Zea mays OX=4577 GN=RPS28 PE=3 SV=1	J	Translation, ribosomal structure and biogenesis	PREDICTED: 40S ribosomal protein S28 [Fragaria vesca subsp. vesca]
MD04G1101700	690.685	134.671	483.81	18.447	11.3318	22.93	721.146	486.498	775.897	24.7145	22.5933	13.7601	--	--	Molecular Function: peroxidase activity (GO:0004601);; Cellular Component: cytosol (GO:0005829);; Biological Process: response to oxidative stress (GO:0006979);; Molecular Function: heme binding (GO:0020037);; Molecular Function: metal ion binding (GO:0046872);; Biological Process: defense response to fungus (GO:0050832);; Biological Process: oxidation-reduction process (GO:0055114);;	K00430|0|mdm:103433277|K00430 peroxidase [EC:1.11.1.7] | (RefSeq) peroxidase 21	--	--	Peroxidase 21 OS=Arabidopsis thaliana OX=3702 GN=PER21 PE=1 SV=1	G	Carbohydrate transport and metabolism	PREDICTED: peroxidase 21 [Malus domestica]
MD01G1238100	10.8081	10.9958	11.187	18.0837	7.21948	23.1079	8.64004	11.2052	8.50394	26.9659	22.8501	31.0405	[V]	Defense mechanisms	Molecular Function: catalytic activity (GO:0003824);; Biological Process: metabolic process (GO:0008152);;	--	[V]	Defense mechanisms	LanC-like protein GCL1 OS=Arabidopsis thaliana OX=3702 GN=GCL1 PE=2 SV=1	S	Function unknown	PREDICTED: lanC-like protein GCL1 [Malus domestica]
MD00G1163400	0.393567	0.147882	0.662222	17.5356	11.3179	23.3628	0.419694	0.298529	0.440644	37.0397	39.0142	28.489	--	--	--	--	--	--	--	S	Function unknown	PREDICTED: uncharacterized protein LOC103454794 isoform X1 [Malus domestica]
MD00G1062100	0.266146	1.93904	0.477584	16.9328	15.3052	16.5667	0.289019	0.175934	0.166749	17.1552	16.0809	20.2285	[O]	Posttranslational modification, protein turnover, chaperones	Molecular Function: ATP binding (GO:0005524);; Cellular Component: cytoplasm (GO:0005737);; Biological Process: response to stress (GO:0006950);; Biological Process: protein refolding (GO:0042026);;	K04077|0|pxb:103960361|K04077 chaperonin GroEL | (RefSeq) chaperonin CPN60-2, mitochondrial-like	[O]	Posttranslational modification, protein turnover, chaperones	Chaperonin CPN60-2, mitochondrial OS=Cucurbita maxima OX=3661 GN=CPN60-2 PE=1 SV=1	O	Posttranslational modification, protein turnover, chaperones	PREDICTED: chaperonin CPN60-2, mitochondrial-like [Pyrus x bretschneideri]
MD11G1145400	21.3826	18.7522	50.8684	16.6723	16.9277	21.2165	38.7221	33.3168	28.1639	18.652	15.4498	19.3858	--	--	--	--	--	--	BAG family molecular chaperone regulator 6 OS=Arabidopsis thaliana OX=3702 GN=BAG6 PE=1 SV=1	S	Function unknown	PREDICTED: BAG family molecular chaperone regulator 6 isoform X1 [Malus domestica]
MD01G1068900	34.4413	75.0811	90.8097	16.5341	20.7733	23.5197	27.0486	13.747	33.8673	13.0996	16.0801	15.9173	[G]	Carbohydrate transport and metabolism	Molecular Function: polygalacturonase activity (GO:0004650);; Cellular Component: extracellular region (GO:0005576);; Biological Process: carbohydrate metabolic process (GO:0005975);;	--	--	--	Probable polygalacturonase OS=Vitis vinifera OX=29760 GN=GSVIVT00026920001 PE=1 SV=1	M	Cell wall/membrane/envelope biogenesis	PREDICTED: probable polygalacturonase [Malus domestica]
MD02G1187200	39.493	69.4021	40.5742	15.2386	15.452	21.44	39.9986	30.1207	41.8466	26.1003	27.4745	21.345	[T]	Signal transduction mechanisms	Molecular Function: protein serine/threonine kinase activity (GO:0004674);; Molecular Function: protein tyrosine kinase activity (GO:0004713);; Molecular Function: ATP binding (GO:0005524);; Cellular Component: plasma membrane (GO:0005886);; Biological Process: glycolytic process (GO:0006096);; Biological Process: water transport (GO:0006833);; Biological Process: hyperosmotic response (GO:000697…	--	[G]	Carbohydrate transport and metabolism	Shaggy-related protein kinase eta OS=Arabidopsis thaliana OX=3702 GN=ASK7 PE=1 SV=2	T	Signal transduction mechanisms	PREDICTED: shaggy-related protein kinase eta [Malus domestica]
MD09G1105100	15.5773	17.6219	14.091	15.0318	10.3241	14.7613	12.2281	12.5753	12.2533	13.5163	12.7465	9.71838	--	--	Molecular Function: ligase activity (GO:0016874);;	K10591|0|mdm:103446785|K10591 E3 ubiquitin-protein ligase NEDD4 [EC:2.3.2.26] | (RefSeq) E3 ubiquitin-protein ligase UPL5-like	[O]	Posttranslational modification, protein turnover, chaperones	E3 ubiquitin-protein ligase UPL5 OS=Arabidopsis thaliana OX=3702 GN=UPL5 PE=1 SV=1	O	Posttranslational modification, protein turnover, chaperones	PREDICTED: E3 ubiquitin-protein ligase UPL5-like isoform X1 [Malus domestica]
MD02G1086400	8.90848	5.0141	6.05729	15.0218	12.1922	13.3747	6.05603	4.8954	5.62761	11.8521	16.2351	13.0846	--	--	--	--	--	--	Zinc finger CCCH domain-containing protein 53 OS=Oryza sativa subsp. japonica OX=39947 GN=Os07g0682400 PE=2 SV=1	S	Function unknown	PREDICTED: zinc finger CCCH domain-containing protein 53-like [Malus domestica]
MD14G1236000	0.072427	16.3889	0.021564	14.9693	21.9946	12.6218	0	0.00989	0.021155	13.1328	11.908	13.4077	--	--	Biological Process: lipid metabolic process (GO:0006629);; Molecular Function: O-acyltransferase activity (GO:0008374);;	K00679|0|mdm:103450792|K00679 phospholipid:diacylglycerol acyltransferase [EC:2.3.1.158] | (RefSeq) phospholipid:diacylglycerol acyltransferase 1	[I]	Lipid transport and metabolism	Phospholipid:diacylglycerol acyltransferase 1 OS=Arabidopsis thaliana OX=3702 GN=PDAT1 PE=2 SV=1	S	Function unknown	PREDICTED: phospholipid:diacylglycerol acyltransferase 1 isoform X2 [Malus domestica]
MD07G1280400	32.0279	72.3064	48.3379	14.9193	22.5991	15.6569	28.069	27.4143	30.8077	6.54333	7.51986	9.51899	--	--	--	--	[U]	Intracellular trafficking, secretion, and vesicular transport	Transmembrane 9 superfamily member 3 OS=Arabidopsis thaliana OX=3702 GN=TMN3 PE=2 SV=1	S	Function unknown	PREDICTED: transmembrane 9 superfamily member 3-like [Malus domestica]
MD08G1247700	14.0278	19.1384	8.8132	14.1263	16.6999	15.1139	14.7049	15.7981	14.268	10.0911	10.3406	12.0414	--	--	Molecular Function: SNAP receptor activity (GO:0005484);; Biological Process: intracellular protein transport (GO:0006886);; Cellular Component: membrane (GO:0016020);; Biological Process: vesicle-mediated transport (GO:0016192);;	--	[U]	Intracellular trafficking, secretion, and vesicular transport	Syntaxin-22 OS=Arabidopsis thaliana OX=3702 GN=SYP22 PE=1 SV=1	U	Intracellular trafficking, secretion, and vesicular transport	PREDICTED: syntaxin-22-like [Malus domestica]
MD06G1149700	11.4079	7.6003	7.03261	13.8693	25.4779	11.7623	8.14134	6.19733	8.20157	8.51211	7.80087	7.29328	--	--	--	--	[R]	General function prediction only	--	S	Function unknown	PREDICTED: putative lipase YOR059C [Malus domestica]
MD01G1161200	5.68494	7.68985	3.89208	13.8059	14.0275	14.112	6.99651	5.60194	5.90332	14.3161	11.4175	13.5183	--	--	--	K09284|0|mdm:103421864|K09284 AP2-like factor, euAP2 lineage | (RefSeq) ethylene-responsive transcription factor RAP2-7-like	--	--	Ethylene-responsive transcription factor RAP2-7 OS=Arabidopsis thaliana OX=3702 GN=RAP2-7 PE=2 SV=2	K	Transcription	PREDICTED: ethylene-responsive transcription factor RAP2-7-like isoform X1 [Malus domestica]
MD15G1331300	2.87564	0.60497	5.10826	13.7297	8.33989	14.4752	2.98572	2.97852	3.3778	19.1137	18.7864	12.0104	[I]	Lipid transport and metabolism	Biological Process: long-chain fatty acid metabolic process (GO:0001676);; Molecular Function: acyl-CoA dehydrogenase activity (GO:0003995);; Molecular Function: acyl-CoA oxidase activity (GO:0003997);; Cellular Component: peroxisome (GO:0005777);; Biological Process: fatty acid beta-oxidation (GO:0006635);; Biological Process: response to cytokinin (GO:0009735);; Biological Process: proteasome-m…	K00232|0|mdm:103401681|K00232 acyl-CoA oxidase [EC:1.3.3.6] | (RefSeq) acyl-coenzyme A oxidase 2, peroxisomal-like	[IQ]	--	Acyl-coenzyme A oxidase 2, peroxisomal OS=Arabidopsis thaliana OX=3702 GN=ACX2 PE=1 SV=2	I	Lipid transport and metabolism	PREDICTED: acyl-coenzyme A oxidase 2, peroxisomal-like [Malus domestica]
MD02G1135800	0.935066	5.51819	4.8171	13.2852	12.5197	9.68326	1.90445	7.00145	6.25007	12.1775	13.0177	13.5185	[E]	Amino acid transport and metabolism	--	--	--	--	Stress-response A/B barrel domain-containing protein HS1 OS=Arabidopsis thaliana OX=3702 GN=HS1 PE=1 SV=1	S	Function unknown	PREDICTED: stress-response A/B barrel domain-containing protein HS1-like [Malus domestica]
MD07G1068700	0.02397	0.144214	0.048339	13.1675	15.8704	17.4562	0.072473	0.010329	0	17.0205	14.7455	25.8121	[HT]	--	Biological Process: maltose metabolic process (GO:0000023);; Cellular Component: plastoglobule (GO:0010287);; Biological Process: chlorophyll catabolic process (GO:0015996);; Molecular Function: transferase activity, transferring phosphorus-containing groups (GO:0016772);; Biological Process: starch biosynthetic process (GO:0019252);; Biological Process: positive regulation of catalytic activity …	K08869|0|pxb:103953728|K08869 aarF domain-containing kinase | (RefSeq) uncharacterized aarF domain-containing protein kinase At5g05200, chloroplastic-like	[R]	General function prediction only	Uncharacterized aarF domain-containing protein kinase At5g05200, chloroplastic OS=Arabidopsis thaliana OX=3702 GN=At5g05200 PE=1 SV=1	S	Function unknown	PREDICTED: uncharacterized aarF domain-containing protein kinase At5g05200, chloroplastic-like [Pyrus x bretschneideri]
[truncated: 49 more rows]
